# Supplementary material for: BRAF activates PAX3 to control muscle precursor cell migration during forelimb muscle development
Source: eLife. 2016 Dec 1;5:e18351. doi: 10.7554/eLife.18351 (PMC5148607; doi:10.7554/eLife.18351)
Supplement: Figure 7—source data 1. — DOI: http://dx.doi.org/10.7554/eLife.18351.013 [file elife-18351-fig7-data1.xlsx]

## Sheet: description of table
Column	Description
Proteins	Uniprot Ids
Positions within proteins	position of phosphorylation within protein according to Uniprot Id
Leading proteins	leading protein IDs
Protein names	Protein names according to the uniport.org website
Gene names	Gene names according to the uniport.org website
-Log10 t-test p value	negative log10 p-value
log2 Ratio H/L	log2 Ratio H/L
Sequence window	Peptide sequence window
Number of Phospho (STY)	number of STY Phospho sites
Amino acid	modified amino acid
Charge	charge state of precursor ion
Localization prob	defines localization probability (with 1 being 100% certain)
PEP	Posterior Error Probability of the identification. This value essentially operates as a p-value, where smaller is better.
Score	Andromeda score for the best associated MS/MS spectrum.
Score diff	Sequence representation for each of the possible PTM positions in each possible configuration, the difference is calculated between the identification score with the PTM added to that position and the best scoring identification where no PTM is added to that position. When this value is negative, it is unlikely that the particular modification is located at this position

## Sheet: global Phosphoproteome data
Proteins	Positions within proteins	Leading proteins	Protein names	Gene names	-Log10 t-test p value_Phospho H(PAX3+Braf)/L(PAX2) norm on Protein level	log2 Ratio_Phospho H(Pax3+Braf)/L(Pax3) norm on Protein level	Sequence window	Number of Phospho (STY)	log 2 Ratio Phospho Exp1 H(Pax3+Braf)/ L(Pax3)	log 2 Ratio Proteome Exp1 H(Pax3+Braf)/ L(Pax3)	log 2 Ratio Phospho Exp2 H(Pax3+Braf)/ L(Pax3)	log 2 Ratio Proteome Exp2 H(Pax3+Braf)/ L(Pax3)	log 2 Ratio Phospho Exp1 norm on prot (H: Pax3+Braf)/L(Pax3))	log 2 Ratio Phospho Exp2 norm on prot (H: Pax3+Braf)/L(Pax3))	Amino acid	Charge	Localization prob	PEP	Score	Score diff	-Log10 t-test p value_Phospho H(PAX2+Braf)/L(PAX2) without normalization on protein level	log2 Ratio_Phospho_H(Pax3+Braf)/Pax3 without normalization on protein level
F5H6W4;B7Z7P5;Q9H992	244;262;300	F5H6W4	E3 ubiquitin-protein ligase MARCH7	2015-03-07	0	NaN	RIASSMSSTFFSRRSSQDSLNTRSLNSENSY	1	0.102053	NaN	NaN	NaN	NaN	NaN	S	2	0.824273	0.0187063	59.855	6.73392	0	0.102053
Q15019;Q15019-2;C9JB25;C9J938;C9IZU3;C9JZI2;C9JFT1;F8WB65;C9JT15;C9JSE7	14;49;14;14;14;14;14;14;14;14	Q15019	Septin-2	2015-09-02	1.00746	0.400141	__MSKQQPTQFINPETPGYVGFANLPNQVHR	1	0.402504	-0.059916	0.280125	-0.057737	0.46242	0.337862	T	3	0.999828	1.97e-05	90.946	38.9771	0.947187	0.341314
Q15019;Q15019-2	218;253	Q15019	Septin-2	2015-09-02	0.674623	0.0332497	IEEHNIKIYHLPDAESDEDEDFKEQTRLLKA	1	-0.0381397	-0.059916	-0.0130139	-0.057737	0.0217763	0.0447231	S	3	1	1.55e-18	279.96	191.335	0.536613	-0.0255768
E7EQM7;C9JM82;E7EPG2;B4DJ62;E7EX32;G3XAH0;Q99719-2;Q99719;H7C299	225;178;263;178;225;234;234;225;91	E7EQM7	Septin-5	2015-09-05	1.80961	-0.216817	IDKFGIHVYQFPECDSDEDEDFKQQDRELKW	1	0.52667	0.738206	0.551983	0.774081	-0.211536	-0.222097	S	3	1	7.42e-06	150.36	126.333	1.82573	0.539327
B1AMS2;F5H1J5;Q14141-2;Q14141-4;Q14141;B4E049	416;446;416;416;416;358	B1AMS2	Septin-6	2015-09-06	1.48417	1.145	TAAELLQSQGSQAGGSQTLKRDKEKKNLGFL	1	1.09085	0.0048968	1.29543	0.0913952	1.08596	1.20403	S	2	0.954049	3.38e-28	324.88	13.1732	1.26405	1.19314
B1AMS2;F5H1J5;Q14141-2;Q14141-4;Q14141;B4E049	418;448;418;418;418;360	B1AMS2	Septin-6	2015-09-06	1.22705	0.298474	AELLQSQGSQAGGSQTLKRDKEKKNLGFL__	1	0.331247	0.0048968	0.361993	0.0913952	0.32635	0.270598	T	2	0.983214	4.55e-29	337.82	17.6769	1.5495	0.34662
G3V1Q4;Q16181;E7ES33;E7EPK1;Q16181-2;H0Y3Y4;H0YFF6	281;334;333;333;333;312;320	G3V1Q4;Q16181	Septin-7	2015-09-07	1.09422	0.679803	YNGVDNNKNKGQLTKSPLAQMEEERREHVAK	1	0.681674	-0.0845479	0.500598	-0.0927863	0.766222	0.593384	S	2	1	0.000375502	148.96	114.31	1.01434	0.591136
G3V1Q4;Q16181;E7ES33;E7EPK1;Q16181-2;H0Y3Y4;H0YFF6	175;228;227;227;227;206;214	G3V1Q4;Q16181	Septin-7	2015-09-07	0.188988	0.141461	KEIQEHKIKIYEFPETDDEEENKLVKKIKDR	1	0.285461	-0.0845479	-0.179874	-0.0927863	0.370009	-0.0870878	T	2	1	0.0013629	106.28	80.0663	0.0665367	0.0527936
A6NMH6;A6NFQ9;F8W8I8;Q92599-2;F6W7K9;Q92599	10;10;10;10;10;10	A6NMH6	Septin-8	2015-09-08	0.371699	0.628733	______MAATDLERFSNAEPEPRSLSLGGHV	1	-0.00203565	-0.135253	1.06716	-0.0570915	0.133218	1.12425	S	2	0.999878	0.000315927	89.011	39.1307	0.299976	0.532561
A6NMH6;A6NFQ9;F8W8I8;Q92599-2;F6W7K9;Q92599	20;20;20;20;20;20	A6NMH6	Septin-8	2015-09-08	0.771523	0.570162	DLERFSNAEPEPRSLSLGGHVGFDSLPDQLV	1	0.590147	-0.135253	0.357833	-0.0570915	0.7254	0.414925	S	3	0.989683	5.69e-05	105.24	19.8197	0.815321	0.47399
Q9UHD8-5;Q9UHD8-7;Q9UHD8-2;Q9UHD8;Q9UHD8-3;Q9UHD8-4;Q9UHD8-9;Q9UHD8-8;K7EL40;K7EK18;K7ER52;K7EIE4;K7EQD7;K7ELJ9;K7ER14;K7EJZ2;K7EIR4;K7EKN4;K7EN52;K7ENQ5	325;313;314;332;168;81;108;220;81;81;81;81;81;81;149;81;81;81;81;81	Q9UHD8-5	Septin-9	2015-09-09	0	0.745357	TLFKSKISRKSVQPTSEERIPKTIEIKSITH		NaN	0.0963968	0.90589	0.160533	NaN	0.745357	S	2	0.839354	0.0515894	54.073	7.18143	0	0.90589
Q9UHD8-5;Q9UHD8-7;Q9UHD8-2;Q9UHD8;K7ENL0;K7EPY1;K7EJV0	35;23;24;42;27;49;27	Q9UHD8-5	Septin-9	2015-09-09	0	0.484906	LKRSFEVEEVETPNSTPPRRVQTPLLRATVA	1	0.581303	0.0963968	NaN	0.160533	0.484906	NaN	T	2	0.790669	0.000155723	174.87	5.82096	0	0.581303
Q9UHD8-5;Q9UHD8-7;Q9UHD8-2;Q9UHD8;K7ENL0;K7EPY1;K7EJV0	75;63;64;82;67;89;67	Q9UHD8-5	Septin-9	2015-09-09	0	0.0132341	GVKNSEPSARHVDSLSQRSPKASLRRVELSG	1	NaN	0.0963968	0.173767	0.160533	NaN	0.0132341	S	2	0.700064	0.0132598	111.12	3.76816	0	0.173767
Q9UHD8-5;Q9UHD8-7;Q9UHD8-2;Q9UHD8;K7ENL0;K7EPY1;K7EJV0	23;11;12;30;15;37;15	Q9UHD8-5	Septin-9	2015-09-09	0.0393814	-0.0226273	AQLDGIISDFEALKRSFEVEEVETPNSTPPR	1	0.238909	0.0963968	-0.0272338	0.160533	0.142512	-0.187767	S	2	1	8.62e-06	224.86	147.951	0.242408	0.105838
Q9UHD8-5;Q9UHD8-7;Q9UHD8-2;Q9UHD8;K7ENL0;K7EPY1;K7EJV0	78;66;67;85;70;92;70	Q9UHD8-5	Septin-9	2015-09-09	0.279283	-0.239022	NSEPSARHVDSLSQRSPKASLRRVELSGPKA	1	0.116498	0.0963968	-0.337612	0.160533	0.0201011	-0.498145	S	3	0.994197	0.000803258	162.16	22.339	0.147807	-0.110557
Q9UHD8-5;Q9UHD8-7;Q9UHD8-2;Q9UHD8;K7ENL0;K7EPY1;K7EJV0	34;22;23;41;26;48;26	Q9UHD8-5	Septin-9	2015-09-09	0.842972	-0.247859	ALKRSFEVEEVETPNSTPPRRVQTPLLRATV	1	-0.0946029	0.0963968	-0.144186	0.160533	-0.191	-0.304719	S	3	0.638733	2.29e-05	165.06	2.54426	0.884931	-0.119394
Q9UHD8-5;Q9UHD8-7;Q9UHD8-2;Q9UHD8;K7ENL0;K7EJ51;K7ER34	135;123;124;142;127;36;36	Q9UHD8-5	Septin-9	2015-09-09	2.02108	-0.524376	PSRFGLKRAEVLGHKTPEPAPRRTEITIVKP	1	-0.435827	0.0963968	-0.355996	0.160533	-0.532224	-0.516529	T	2	1	0.000493915	102.39	76.6789	1.19404	-0.395911
Q9UHD8-5;Q9UHD8-7;Q9UHD8-2;Q9UHD8;Q9UHD8-3;K7ER14;K7EJL9	231;219;220;238;74;55;47	Q9UHD8-5	Septin-9	2015-09-09	0	-0.887005	LEPKPQPPVAEATPRSQEATEAAPSCVGDMA	1	NaN	0.0963968	-0.726472	0.160533	NaN	-0.887005	S	2	0.99933	0.000328559	111.84	31.7333	0	-0.726472
D6RGI3;D6RER5;Q9NVA2	9;9;9	D6RGI3	Septin-11	2015-09-11	1.55211	0.981539	_______MAVAVGRPSNEELRNLSLSGHVGF	1	0.994435	0.0561673	1.06619	0.0413831	0.938268	1.02481	S	2	1	0.000163699	162.64	101.009	1.65443	1.03031
D6RGI3;D6RER5;Q9NVA2;Q9NVA2-2;D6RDU5;D6RDP1;D6R9Y6	17;17;17;27;9;27;27	D6RGI3	Septin-11	2015-09-11	1.39294	0.24823	AVAVGRPSNEELRNLSLSGHVGFDSLPDQLV	1	0.320196	0.0561673	0.273814	0.0413831	0.264028	0.232431	S	2	0.980297	3.74e-05	115.79	16.973	1.30445	0.297005
Q9NRG9;F8VZ44;Q9NRG9-2	495;371;462	Q9NRG9	Aladin	AAAS	1.52324	0.539195	AHIPLYFVNAQFPRFSPVLGRAQEPPAGGGG	1	0.363003	-0.150785	0.481505	-0.0830954	0.513788	0.564601	S	2	1	0.0155705	111.06	100.984	1.05182	0.422254
Q6PD74;B4DG44	310;201	Q6PD74	Alpha- and gamma-adaptin-binding protein p34	AAGAB	0	NaN	FWMAIGGDRDEIEGLSSDEEH__________	2	NaN	-0.0649477	NaN	-0.0614959	NaN	NaN	S	2	1	5.28e-06	143.05	143.055	0	NaN
Q6PD74;B4DG44	311;202	Q6PD74	Alpha- and gamma-adaptin-binding protein p34	AAGAB	0	NaN	WMAIGGDRDEIEGLSSDEEH___________	2	NaN	-0.0649477	NaN	-0.0614959	NaN	NaN	S	2	1	5.28e-06	143.05	143.055	0	NaN
Q2M2I8;Q2M2I8-2;E9PG46	14;14;14	Q2M2I8	AP2-associated protein kinase 1	AAK1	0	NaN	__MKKFFDSRREQGGSGLGSGSSGGGGSTSG		NaN	0.443713	NaN	0.64441	NaN	NaN	S	3	0.472355	0.0013767	43.462	4.47633	0	NaN
Q2M2I8;Q2M2I8-2	670;670	Q2M2I8	AP2-associated protein kinase 1	AAK1	0	NaN	LLQAAAAEASLNKSKSATTTPSGSPRTSQQN	3	NaN	0.443713	NaN	0.64441	NaN	NaN	S	2	0.872606	0.00192519	107.63	8.39671	0	NaN
Q2M2I8;Q2M2I8-2;E9PG46	624;624;624	Q2M2I8;REV__Q2M2I8	AP2-associated protein kinase 1	AAK1	0	NaN	;PAVQGQKVGSLTPPSSPKTQRAGHRRILSDV	2	NaN	0.443713	NaN	0.64441	NaN	NaN	S	2	0.500049	0.00193747	139.71	0	0	NaN
Q2M2I8;Q2M2I8-2;E9PG46	620;620;620	Q2M2I8;REV__Q2M2I8	AP2-associated protein kinase 1	AAK1	0	NaN	;TTPPPAVQGQKVGSLTPPSSPKTQRAGHRRI	2	NaN	0.443713	NaN	0.64441	NaN	NaN	T	2	0.999982	0.001313	163.26	49.1947	0	NaN
Q2M2I8;Q2M2I8-2;E9PG46	623;623;623	Q2M2I8;REV__Q2M2I8	AP2-associated protein kinase 1	AAK1	1.20763	1.6826	;PPAVQGQKVGSLTPPSSPKTQRAGHRRILSD	1;2	2.29069	0.443713	2.16263	0.64441	1.84698	1.51822	S	2	0.891152	0.001313	163.26	9.13146	1.73751	2.22666
Q2M2I8	846	Q2M2I8	AP2-associated protein kinase 1	AAK1	0.6054	0.690932	SLIPGLEPPVPQRLPSQTESVTSNRTDSLTG	1	1.41841	0.443713	1.05158	0.64441	0.974693	0.407171	S	2	0.999323	0.00195104	135.72	31.8402	1.02752	1.23499
Q2M2I8;Q2M2I8-2	678;678	Q2M2I8	AP2-associated protein kinase 1	AAK1	0	0.264783	ASLNKSKSATTTPSGSPRTSQQNVYNPSEGS	1;2	0.708496	0.443713	NaN	0.64441	0.264783	NaN	S	2	0.811787	0.00193094	107.7	7.01728	0	0.708496
Q2M2I8;Q2M2I8-2	674;674	Q2M2I8	AP2-associated protein kinase 1	AAK1	0	0.170573	AAAEASLNKSKSATTTPSGSPRTSQQNVYNP	1;2;3	0.614286	0.443713	NaN	0.64441	0.170573	NaN	T	2	0.9909	0.00192519	107.7	20.863	0	0.614286
Q2M2I8;Q2M2I8-2	676;676	Q2M2I8	AP2-associated protein kinase 1	AAK1	0.260165	0.134816	AEASLNKSKSATTTPSGSPRTSQQNVYNPSE	1;2;3	0.736042	0.443713	0.621712	0.64441	0.292329	-0.0226981	S	2	0.800982	0.00192519	124.51	6.09267	1.2718	0.678877
Q2M2I8;Q2M2I8-2;E9PG46	20;20;20	Q2M2I8	AP2-associated protein kinase 1	AAK1	0	-0.281519	FDSRREQGGSGLGSGSSGGGGSTSGLGSGYI	1	NaN	0.443713	0.362891	0.64441	NaN	-0.281519	S	3	0.509281	0.000286073	55.022	1.00483	0	0.362891
Q2M2I8;Q2M2I8-2;E9PG46	21;21;21	Q2M2I8	AP2-associated protein kinase 1	AAK1	0.473008	-0.323415	DSRREQGGSGLGSGSSGGGGSTSGLGSGYIG	1	0.309176	0.443713	0.132116	0.64441	-0.134537	-0.512294	S	3	0.925305	1.34e-05	122.76	11.0358	0.61455	0.220646
Q2M2I8;Q2M2I8-2;E9PG46	606;606;606	Q2M2I8	AP2-associated protein kinase 1	AAK1	0.749571	-0.358324	PAIQAPVRQQPKVQTTPPPAVQGQKVGSLTP	1	0.188274	0.443713	0.183201	0.64441	-0.255439	-0.461209	T	2	0.999794	0.000773869	141.82	36.8611	2.06076	0.185738
Q2M2I8;Q2M2I8-2;E9PG46	389;389;389	Q2M2I8	AP2-associated protein kinase 1	AAK1	0.858894	-0.997845	QTQPNPGILPIQPALTPRKRATVQPPPQAAG	1	-0.333734	0.443713	-0.573832	0.64441	-0.777447	-1.21824	T	2	1	0.000140657	117.61	76.1686	0.783447	-0.453783
Q2M2I8;Q2M2I8-2;E9PG46	637;637;637	Q2M2I8	AP2-associated protein kinase 1	AAK1	1.29448	-1.14421	PSSPKTQRAGHRRILSDVTHSAVFGVPASKS	1	-0.609068	0.443713	-0.591223	0.64441	-1.05278	-1.23563	S	2	0.999997	5.54e-09	247.35	54.9949	2.02392	-0.600146
P49588	555	P49588	Alanine--tRNA ligase, cytoplasmic	AARS	0.153684	0.0228291	GQIYDEGYLVKVDDSSEDKTEFTVKNAQVRG	1	-0.0415211	-0.109499	-0.137886	-0.115566	0.0679778	-0.0223197	S	2	0.999828	1.71e-05	271.49	37.6313	0.503354	-0.0897035
G3V0G4;R4GNB1;Q4L235-3;Q4L235-4;Q4L235-2;Q4L235	164;496;649;649;549;649	G3V0G4	Acyl-CoA synthetase family member 4	AASDH	0	NaN	EDVTFRKSCATKRKLSDINQEEASGTSLHQK	1	1.92759	NaN	1.64787	NaN	NaN	NaN	S	3	1	1.71e-05	160.84	82.4653	1.3036	1.78773
Q9NRN7	258	Q9NRN7	L-aminoadipate-semialdehyde dehydrogenase-phosphopantetheinyl transferase	AASDHPPT	0.679842	-0.546415	VALRKPDGSRHQDVPSQDDSKPTQRQFTILN	1	-0.970696	-0.238153	-0.591245	-0.230956	-0.732542	-0.360288	S	2	0.999961	0.000339162	196.96	44.1329	0.818961	-0.78097
Q9NY61	316	Q9NY61	Protein AATF	AATF	0	NaN	PDTRYLVDGTKPNAGSEEISSEDDELVEEKK	3	NaN	-0.000259717	NaN	0.0287106	NaN	NaN	S	3	0.999991	1.91e-08	161.3	50.3797	0	NaN
Q9NY61	320	Q9NY61	Protein AATF	AATF	0	NaN	YLVDGTKPNAGSEEISSEDDELVEEKKQQRR	2;3	NaN	-0.000259717	NaN	0.0287106	NaN	NaN	S	3	1	1.91e-08	179.64	91.7624	0	NaN
Q9NY61	321	Q9NY61	Protein AATF	AATF	0	NaN	LVDGTKPNAGSEEISSEDDELVEEKKQQRRR	2;3	NaN	-0.000259717	NaN	0.0287106	NaN	NaN	S	3	1	1.91e-08	179.64	95.3373	0	NaN
Q9NY61	203	Q9NY61	Protein AATF	AATF	1.29333	0.577487	DSQGESEEDRAGDRNSEDDGVVMTFSSVKVS	1	0.623492	-0.000259717	0.559932	0.0287106	0.623752	0.531222	S	3	1	8.59e-12	259.42	77.4753	1.46649	0.591712
H0Y8C9;H0Y8D6;E7EU84;J3QSS3;Q9BZC7-2;Q9BZC7;Q9BZC7-3	675;678;1357;1328;1327;1327;1328	H0Y8C9	ATP-binding cassette sub-family A member 2	ABCA2	0	NaN	TTLEEVFLKVSEEDQSLENSEADVKESRKDV	2	NaN	NaN	NaN	NaN	NaN	NaN	S	2	0.99999	0.000647759	120.33	50.0129	0	NaN
H0Y8C9;H0Y8D6;E7EU84;J3QSS3;Q9BZC7-2;Q9BZC7;Q9BZC7-3	679;682;1361;1332;1331;1331;1332	H0Y8C9	ATP-binding cassette sub-family A member 2	ABCA2	0	NaN	EVFLKVSEEDQSLENSEADVKESRKDVLPGA	2	NaN	NaN	NaN	NaN	NaN	NaN	S	2	1	0.000647759	120.33	95.1743	0	NaN
Q2M3G0;Q2M3G0-4	227;672	Q2M3G0	ATP-binding cassette sub-family B member 5	ABCB5	0	NaN	DFIDKAEESTQSKEISLPEVSLLKILKLNKP	1	0.646808	NaN	NaN	NaN	NaN	NaN	S	2	0.99989	0.00730448	77.597	39.5989	0	0.646808
P33527-7;P33527-4;P33527-3;P33527;I3L4X2;P33527-9;P33527-8;P33527-6;P33527-5;P33527-2	859;915;859;915;824;925;800;856;800;856	P33527-7	Multidrug resistance-associated protein 1	ABCC1	0	NaN	MLVTDSAGKQLQRQLSSSSSYSGDISRHHNS	3	NaN	0.0408223	NaN	0.0564447	NaN	NaN	S	2	0.565576	0.0123762	42.209	1.8546	0	NaN
P33527-7;P33527-4;P33527-3;P33527;I3L4X2;P33527-9;P33527-8;P33527-6;P33527-5;P33527-2	862;918;862;918;827;928;803;859;803;859	P33527-7	Multidrug resistance-associated protein 1	ABCC1	0	NaN	TDSAGKQLQRQLSSSSSYSGDISRHHNSTAE	3	NaN	0.0408223	NaN	0.0564447	NaN	NaN	S	2	0.673669	0.0123762	42.209	3.88758	0	NaN
P33527-7;P33527-4;P33527-3;P33527;I3L4X2;P33527-9;P33527-8;P33527-6;P33527-5;P33527-2	874;930;874;930;839;940;815;871;815;871	P33527-7	Multidrug resistance-associated protein 1	ABCC1	0	0.40906	SSSSSYSGDISRHHNSTAELQKAEAKKEETW	1	NaN	0.0408223	0.465504	0.0564447	NaN	0.40906	S	2	0.945744	0.0042676	121.56	12.4133	0	0.465504
P33527-7;P33527-4;P33527-3;P33527;I3L4X2;P33527-9;P33527-8;P33527-6;P33527-5;P33527-2	863;919;863;919;828;929;804;860;804;860	P33527-7	Multidrug resistance-associated protein 1	ABCC1	0	-1.3338	DSAGKQLQRQLSSSSSYSGDISRHHNSTAEL	1;3	NaN	0.0408223	-1.27736	0.0564447	NaN	-1.3338	S	2	0.744222	0.0123762	55.437	6.49814	0	-1.27736
O15439;O15439-2;O15439-3;B7Z3Q7	646;646;646;571	O15439	Multidrug resistance-associated protein 4	ABCC4	0.557766	-0.400196	LKKDNEESEQPPVPGTPTLRNRTFSESSVWS	1	-0.259098	0.326997	-0.17994	0.0343565	-0.586096	-0.214296	T	2	0.965535	2.15e-18	315.26	14.4738	0.944763	-0.219519
Q86UX3;O15440	558;558	Q86UX3	Multidrug resistance-associated protein 5	ABCC5	0	0.855244	AEQKGHLLLDSDERPSPEEEEGKHIHLGHLR	1	0.993783	NaN	1.13192	0.276675	NaN	0.855244	S	3	0.999994	1.87e-06	177.03	51.9909	1.38393	1.06285
Q86UX3;O15440	509;509	Q86UX3	Multidrug resistance-associated protein 5	ABCC5	0	-0.127026	NATLAWDSSHSSIQNSPKLTPKMKKDKRASR	1;2	0.414677	NaN	0.14965	0.276675	NaN	-0.127026	S	2	1	4.69e-63	425.91	118.261	0.553595	0.282163
Q86UX3;O15440	505;505	Q86UX3	Multidrug resistance-associated protein 5	ABCC5	0	-0.131976	IEMKNATLAWDSSHSSIQNSPKLTPKMKKDK	1;2	0.0170666	NaN	0.144699	0.276675	NaN	-0.131976	S	2	0.879409	3.79e-08	216.85	8.70125	0.371347	0.0808828
Q5STZ8;Q8NE71;Q8NE71-2;F5GYK6	106;105;105;8	Q5STZ8;Q8NE71	ATP-binding cassette sub-family F member 1	ABCF1	0	NaN	DDGEEKELMERLKKLSVPTSDEEDEVPAPKP	2;3	NaN	0.0439044	NaN	0.00662125	NaN	NaN	S	3	1	1.18e-05	181.11	60.4719	0	NaN
Q5STZ8;Q8NE71;Q8NE71-2;F5GYK6	109;108;108;11	Q5STZ8;Q8NE71	ATP-binding cassette sub-family F member 1	ABCF1	0	NaN	EEKELMERLKKLSVPTSDEEDEVPAPKPRGG	2;3	NaN	0.0439044	NaN	0.00662125	NaN	NaN	T	3	1	1.14e-10	258.19	60.4719	0	NaN
Q8NE71;Q8NE71-2;H0YGW7	621;583;372	Q8NE71	ATP-binding cassette sub-family F member 1	ABCF1	0	1.4543	KEYTVRFTFPDPPPLSPPVLGLHGVTFGYQG	1	1.4982	0.0439044	NaN	0.00662125	1.4543	NaN	S	3	1	9.11e-09	161.26	65.4283	0	1.4982
Q5STZ8;Q8NE71	229;228	Q5STZ8;Q8NE71	ATP-binding cassette sub-family F member 1	ABCF1	0.77334	0.141039	PPKQGKEKAKKAEQGSEEEGEGEEEEEEGGE	1	0.223175	0.0439044	0.109427	0.00662125	0.179271	0.102806	S	2	1	1.73e-163	486.71	339.115	0.678232	0.166301
Q5STZ8;Q8NE71;Q8NE71-2;F5GYK6	167;166;166;69	Q5STZ8;Q8NE71	ATP-binding cassette sub-family F member 1	ABCF1	3.50194	0.109955	PKPAKPEKNRINKAVSEEQQPALKGKKGKEE	1	0.153805	0.0439044	0.116631	0.00662125	0.109901	0.11001	S	2	1	2.88e-05	194.98	113.253	1.06065	0.135218
Q5STZ8;Q8NE71;Q8NE71-2;Q5STZ7	22;22;22;22	Q5STZ8;Q8NE71	ATP-binding cassette sub-family F member 1	ABCF1	0.697143	0.0805291	QQPPEPEWIGDGESTSPSDKVVKKGKKDKKI	1	0.09815	0.0439044	0.113434	0.00662125	0.0542456	0.106813	S	2	0.980765	3.84e-15	258.83	20.1319	1.33813	0.105792
Q5STZ8;Q8NE71;Q8NE71-2;F5GYK6	141;140;140;43	Q5STZ8;Q8NE71	ATP-binding cassette sub-family F member 1	ABCF1	0.306375	0.0367538	KTKGGNVFAALIQDQSEEEEEEEKHPPKPAK	1	0.0446039	0.0439044	0.0794293	0.00662125	0.0006995	0.072808	S	3	1	8.44e-66	406.5	121.505	0.758802	0.0620166
Q5STZ8;Q8NE71;Q8NE71-2;F5GYK6	110;109;109;12	Q5STZ8;Q8NE71	ATP-binding cassette sub-family F member 1	ABCF1	1.55352	-0.621825	EKELMERLKKLSVPTSDEEDEVPAPKPRGGK	1;2;3	-0.605244	0.0439044	-0.58788	0.00662125	-0.649149	-0.594501	S	2	1	1.14e-10	258.19	84.6655	2.03317	-0.596562
Q8NE71;Q8NE71-2;H0YGW7	595;557;346	Q8NE71	ATP-binding cassette sub-family F member 1	ABCF1	1.14988	-1.51677	TRKQQKCRRKNQDEESQEAPELLKRPKEYTV	1	-1.64228	0.0439044	-1.34073	0.00662125	-1.68618	-1.34735	S	2	1	0.000121629	219.95	182.087	1.19289	-1.49151
F8WA56;A6NFN2;Q8IZP0-2;Q8IZP0-4;Q8IZP0-3;Q8IZP0-5;Q8IZP0-6;Q8IZP0-9;Q8IZP0-12;Q8IZP0	300;327;293;298;299;294;298;299;343;326	F8WA56	Abl interactor 1	ABI1	0	NaN	YGTMTRQISRHNSTTSSTSSGGYRRTPSVTA	2	NaN	0.124593	NaN	0.0603242	NaN	NaN	S	2	0.578544	0.00244188	74.618	4.28362	0	NaN
F8WA56;A6NFN2;Q8IZP0-2;Q8IZP0-4;Q8IZP0-3;Q8IZP0-5;Q8IZP0-6;Q8IZP0-9;Q8IZP0-12;Q8IZP0	303;330;296;301;302;297;301;302;346;329	F8WA56	Abl interactor 1	ABI1	0	NaN	MTRQISRHNSTTSSTSSGGYRRTPSVTAQFS	2	NaN	0.124593	NaN	0.0603242	NaN	NaN	S	2	0.629631	0.00104734	105.38	5.96878	0	NaN
F8WA56;A6NFN2;Q8IZP0-2;Q8IZP0-4;Q8IZP0-3;Q8IZP0-5;Q8IZP0-6;Q8IZP0-9;Q8IZP0-12;Q8IZP0	297;324;290;295;296;291;295;296;340;323	F8WA56	Abl interactor 1	ABI1	1.00029	0.362258	GSQYGTMTRQISRHNSTTSSTSSGGYRRTPS	1;2	0.544189	0.124593	0.365245	0.0603242	0.419596	0.30492	S	2	0.999005	0.000163161	204.37	30.0626	0.907686	0.454717
F8WA56;A6NFN2;Q8IZP0-2;Q8IZP0-4;Q8IZP0-3;Q8IZP0-5;Q8IZP0-6;Q8IZP0-9;Q8IZP0-12;Q8IZP0;F5H1G9;F8WA55;Q8IZP0-10;Q8IZP0-8;Q8IZP0-7;Q8IZP0-11	226;226;220;225;225;220;225;225;242;225;226;226;220;225;225;161	F8WA56	Abl interactor 1	ABI1	0.214021	-0.0943867	PNDYMTSPARLGSQHSPGRTASLNQRPRTHS	1	0.164915	0.124593	-0.168771	0.0603242	0.0403221	-0.229096	S	2	0.999998	0.00127555	178.36	57.8299	0.00320697	-0.00192822
F8WA56;A6NFN2;Q8IZP0-2;Q8IZP0-4;Q8IZP0-3;Q8IZP0-5;Q8IZP0-6;Q8IZP0-9;Q8IZP0-12;Q8IZP0;F5H1G9;F8WA55;Q8IZP0-10;Q8IZP0-8;Q8IZP0-7;Q8IZP0-11	232;232;226;231;231;226;231;231;248;231;232;232;226;231;231;167	F8WA56	Abl interactor 1	ABI1	0.992336	-0.288659	SPARLGSQHSPGRTASLNQRPRTHSGSSGGS	1	-0.210613	0.124593	-0.181788	0.0603242	-0.335206	-0.242112	S	2	0.999967	0.0180889	97.163	44.777	1.33085	-0.1962
F8WA56;A6NFN2;Q8IZP0-2;Q8IZP0-4;Q8IZP0-3;Q8IZP0-5;Q8IZP0-6;Q8IZP0-9;Q8IZP0-12;Q8IZP0;F5H1G9;F8WA55;Q8IZP0-10;Q8IZP0-8;Q8IZP0-7;Q8IZP0-11	216;216;210;215;215;210;215;215;232;215;216;216;210;215;215;151	F8WA56	Abl interactor 1	ABI1	0	-0.495885	TLEPVKPPTVPNDYMTSPARLGSQHSPGRTA	1	-0.371292	0.124593	NaN	0.0603242	-0.495885	NaN	T	3	0.78193	7.91e-05	204.38	5.54572	0	-0.371292
F8WA56;A6NFN2;Q8IZP0-2;Q8IZP0-4;Q8IZP0-3;Q8IZP0-5;Q8IZP0-6;Q8IZP0-9;Q8IZP0-12;Q8IZP0;F5H1G9;F8WA55;Q8IZP0-10;Q8IZP0-8;Q8IZP0-7;Q8IZP0-11	184;184;178;183;183;178;183;183;200;183;184;184;178;183;183;119	F8WA56	Abl interactor 1	ABI1	1.16709	-0.514661	TGTLSRTNPPTQKPPSPPMSGRGTLGRNTPY	1	-0.445303	0.124593	-0.399102	0.0603242	-0.569896	-0.459427	S	2	0.999976	2.79e-06	237.91	46.2525	1.45845	-0.422203
F8WA56;A6NFN2;Q8IZP0-2;Q8IZP0-4;Q8IZP0-3;Q8IZP0-5;Q8IZP0-6;Q8IZP0-9;Q8IZP0-12;Q8IZP0;F5H1G9;F8WA55;Q8IZP0-10;Q8IZP0-8;Q8IZP0-7;Q8IZP0-11	217;217;211;216;216;211;216;216;233;216;217;217;211;216;216;152	F8WA56	Abl interactor 1	ABI1	1.36678	-0.608883	LEPVKPPTVPNDYMTSPARLGSQHSPGRTAS	1	-0.443124	0.124593	-0.589724	0.0603242	-0.567717	-0.650048	S	3	0.800682	0.000110947	91.416	6.0405	1.04691	-0.516424
Q9NYB9-2;E7EW77;E7EP65;J3KNB2;Q9NYB9-3;Q9NYB9-4;Q9NYB9;H0Y6B5;H7C3Q7	218;224;224;224;173;218;224;65;90	Q9NYB9-2	Abl interactor 2	ABI2	0	NaN	VPNDYVPSPTRNMAPSQQSPVRTASVNQRNR	1	NaN	-0.312742	0.227864	NaN	NaN	NaN	S	2	0.613854	0.00923728	71.558	2.01314	0	0.227864
Q9NYB9-2;E7EW77;E7EP65;J3KNB2;Q9NYB9-3;Q9NYB9-4;Q9NYB9;H0Y6B5;H7C3Q7	221;227;227;227;176;221;227;68;93	Q9NYB9-2	Abl interactor 2	ABI2	0	0.51826	DYVPSPTRNMAPSQQSPVRTASVNQRNRTYS	1	0.205518	-0.312742	-0.189022	NaN	0.51826	NaN	S	2	1	1.13e-07	216.81	108.803	0.0117091	0.00824769
Q9NYB9-2;E7EW77;E7EP65;J3KNB2;Q9NYB9-3;Q9NYB9-4;Q9NYB9;H0Y6B5	236;242;242;242;191;236;242;83	Q9NYB9-2	Abl interactor 2	ABI2	0	0.390395	SPVRTASVNQRNRTYSSSGSSGGSHPSSRSS	1	0.0776532	-0.312742	0.175684	NaN	0.390395	NaN	S	2	0.980443	1.34e-08	264.84	17.0123	0.628842	0.126669
Q9NYB9-2;E7EW77;E7EP65;J3KNB2;Q9NYB9-3;Q9NYB9-4;Q9NYB9;H0Y6B5;H7C3Q7;E9PEZ7;F8WAL6	177;183;183;183;132;177;183;24;49;177;18	Q9NYB9-2	Abl interactor 2	ABI2	0	-0.393981	MGGLPRTTPPTQKPPSPPMSGKGTLGRHSPY	1	-0.706724	-0.312742	NaN	NaN	-0.393981	NaN	S	2	0.997938	0.000298008	90.822	28.9675	0	-0.706724
Q9NYB9-2;E7EW77;E7EP65;J3KNB2;Q9NYB9-3;Q9NYB9-4;Q9NYB9;H0Y6B5;H7C3Q7;E9PEZ7;F8WAL6	297;331;364;364;252;358;364;144;168;309;150	Q9NYB9-2	Abl interactor 2	ABI2	0	-0.578499	QFYSMNRPASRHTPPTIGGSLPYRRPPSITS	1	-0.891241	-0.312742	-0.592571	NaN	-0.578499	NaN	T	2	0.786947	0.00116462	114.01	5.87693	0.898072	-0.741906
Q9NYB9-2;E7EW77;E7EP65;J3KNB2;Q9NYB9-3;Q9NYB9-4;Q9NYB9;H0Y6B5;H7C3Q7	210;216;216;216;165;210;216;57;82	Q9NYB9-2	Abl interactor 2	ABI2	0	-0.599904	LEPVRPPVVPNDYVPSPTRNMAPSQQSPVRT	1	-0.912646	-0.312742	-0.515852	NaN	-0.599904	NaN	S	3	0.774896	1.85e-05	133.15	5.37217	0.763247	-0.714249
Q9NYB9-2;Q9NYB9-3;H0Y6B5;H7C3Q7	285;240;132;156	Q9NYB9-2	Abl interactor 2	ABI2	0	-2.11249	PSPPSVFPGHPVQFYSMNRPASRHTPPTIGG	1	-2.42523	-0.312742	NaN	NaN	-2.11249	NaN	S	4	0.931442	4e-08	142.6	11.359	0	-2.42523
P00519;P00519-2	569;588	P00519	Tyrosine-protein kinase ABL1	ABL1	0	NaN	KGQGESDPLDHEPAVSPLLPRKERGPPEGGL	1	-0.873212	NaN	-0.773861	NaN	NaN	NaN	S	2	1	9.05e-10	214.11	87.1047	1.41619	-0.823537
P00519;P00519-2	718;737	P00519	Tyrosine-protein kinase ABL1	ABL1	0	NaN	EEGGGSSSKRFLRSCSASCVPHGAKDTEWRS	1	0.140779	NaN	0.0356239	NaN	NaN	NaN	S	2	0.999851	0.00207329	119.62	39.108	0.465699	0.0882012
P00519;P00519-2	814;833	P00519	Tyrosine-protein kinase ABL1	ABL1	0	NaN	KDIMESSPGSSPPNLTPKPLRRQVTVAPASG	1	-0.287325	NaN	2.71308	NaN	NaN	NaN	T	2	0.923929	0.00114634	95.51	12.1149	0.246287	1.21288
P00519;P00519-2	852;871	P00519	Tyrosine-protein kinase ABL1	ABL1	0	NaN	GKGSALGTPAAAEPVTPTSKAGSGAPGGTSK	1	0.679424	NaN	0.559247	NaN	NaN	NaN	T	2	0.767029	0.000228307	139.51	8.18542	1.21061	0.619335
P42684;P42684-5;P42684-6;P42684-3;P42684-7;P42684-10;P42684-2;P42684-4	1052;949;1031;1038;928;935;1017;914	P42684	Abelson tyrosine-protein kinase 2	ABL2	0	NaN	GRPVMPPPQVPLPTSSISPAKMANGTAGTKV		NaN	NaN	NaN	-0.545656	NaN	NaN	S	3	0.431853	0.000508091	59.912	0	0	NaN
P42684;P42684-5;P42684-6;P42684-3;P42684-7;P42684-10;P42684-2;P42684-4	1054;951;1033;1040;930;937;1019;916	P42684	Abelson tyrosine-protein kinase 2	ABL2	0	NaN	PVMPPPQVPLPTSSISPAKMANGTAGTKVAL	1	-0.553701	NaN	NaN	-0.545656	NaN	NaN	S	3	0.973488	4.69e-05	103.58	17.2238	0	-0.553701
P42684;P42684-5;P42684-3;P42684-10	71;71;57;57	P42684	Abelson tyrosine-protein kinase 2	ABL2	0	NaN	ASCVEDGFEGDKTGGSSPEALHRPYGCDVEP		NaN	NaN	NaN	-0.545656	NaN	NaN	S	3	0.444237	2.97e-05	111.9	0	0	NaN
P42684;P42684-5;P42684-3;P42684-10	72;72;58;58	P42684	Abelson tyrosine-protein kinase 2	ABL2	0	NaN	SCVEDGFEGDKTGGSSPEALHRPYGCDVEPQ	1	-0.0724828	NaN	NaN	-0.545656	NaN	NaN	S	3	0.841525	3.43e-11	183.65	7.42967	0	-0.0724828
P42684;P42684-5;P42684-6;P42684-3;P42684-7;P42684-10;P42684-2;P42684-4	817;714;796;803;693;700;782;679	P42684	Abelson tyrosine-protein kinase 2	ABL2	0	NaN	PRNCQRSKLQLERTVSTSSQPEENVDRANDM	2	NaN	NaN	NaN	-0.545656	NaN	NaN	S	2	0.995763	0.000146857	161.55	23.9419	0	NaN
P42684;P42684-5;P42684-6;P42684-3;P42684-7;P42684-10;P42684-2;P42684-4	820;717;799;806;696;703;785;682	P42684	Abelson tyrosine-protein kinase 2	ABL2	0	NaN	CQRSKLQLERTVSTSSQPEENVDRANDMLPK	2	NaN	NaN	NaN	-0.545656	NaN	NaN	S	2	0.992909	0.000146857	161.55	21.4972	0	NaN
P42684;P42684-5;P42684-6;P42684-3;P42684-7;P42684-10;P42684-2;P42684-4	936;833;915;922;812;819;901;798	P42684	Abelson tyrosine-protein kinase 2	ABL2	0	1.60515	PVLPTTHNHKVPVLISPTLKHTPADVQLIGT	1	1.09849	NaN	1.05949	-0.545656	NaN	1.60515	S	2	0.925829	0.00402311	113.69	10.963	1.93923	1.07899
P42684;P42684-5;P42684-6;P42684-3;P42684-7;P42684-10;P42684-2;P42684-4	819;716;798;805;695;702;784;681	P42684	Abelson tyrosine-protein kinase 2	ABL2	0	0.913027	NCQRSKLQLERTVSTSSQPEENVDRANDMLP	1	NaN	NaN	0.367371	-0.545656	NaN	0.913027	S	2	0.806588	0.000620871	136.39	7.28154	0	0.367371
P42684;P42684-5;P42684-6;P42684-3;P42684-7;P42684-10;P42684-2;P42684-4	818;715;797;804;694;701;783;680	P42684	Abelson tyrosine-protein kinase 2	ABL2	0	0.849699	RNCQRSKLQLERTVSTSSQPEENVDRANDML	1	NaN	NaN	0.304044	-0.545656	NaN	0.849699	T	2	0.520155	0.0408602	65.105	2.44656	0	0.304044
P42684;P42684-6;P42684-3;P42684-2	783;762;769;748	P42684	Abelson tyrosine-protein kinase 2	ABL2	0	0.666273	PTASDDTSKPFPRSNSTSSMSSGLPEQDRMA	1	0.23131	NaN	0.120617	-0.545656	NaN	0.666273	S	2	0.949371	0.000359573	166.21	12.8585	0.712198	0.175963
P42684;P42684-5;P42684-6;P42684-3;P42684-7;P42684-10;P42684-2;P42684-4	671;671;650;657;650;657;636;636	P42684	Abelson tyrosine-protein kinase 2	ABL2	0	0.59654	FMKKRNAPTPPKRSSSFREMENQPHKKYELT	1	0.199876	NaN	0.0508847	-0.545656	NaN	0.596541	S	3	0.998078	0.000232996	126.26	27.4474	0.466864	0.125381
P42684;P42684-5;P42684-6;P42684-3;P42684-7;P42684-10;P42684-2;P42684-4	631;631;610;617;610;617;596;596	P42684	Abelson tyrosine-protein kinase 2	ABL2	0	0.402347	ASSGSPALPRKQRDKSPSSLLEDAKETCFTR	1	-0.0973012	NaN	-0.143309	-0.545656	NaN	0.402347	S	2	0.999964	0.00312168	182.79	45.5076	0.919813	-0.120305
P42684;P42684-5;P42684-6;P42684-3;P42684-7;P42684-10;P42684-2;P42684-4	655;655;634;641;634;641;620;620	P42684	Abelson tyrosine-protein kinase 2	ABL2	0	0.206201	KETCFTRDRKGGFFSSFMKKRNAPTPPKRSS	1	-0.491267	NaN	-0.339455	-0.545656	NaN	0.206201	S	2	0.97077	0.00438361	96.229	15.2129	0.939034	-0.415361
P42684;P42684-5;P42684-6;P42684-3;P42684-7;P42684-10;P42684-2;P42684-4	620;620;599;606;599;606;585;585	P42684	Abelson tyrosine-protein kinase 2	ABL2	0	-1.85613	SLAPGFIRGAQASSGSPALPRKQRDKSPSSL	1	-2.6918	NaN	-2.40179	-0.545656	NaN	-1.85613	S	2	0.989035	0.00087542	129.05	19.5771	1.44119	-2.54679
J3QSX6;Q5JVV3;F8W8M4;Q5T6N4;O14639-3;O14639-5;Q5T6N2;O14639-2;O14639;H0Y3K7;O14639-4;H0Y7N6;F6XFR5	167;167;395;483;139;167;423;395;455;395;113;120;139	J3QSX6	Actin-binding LIM protein 1	ABLIM1	0	NaN	QDVRDRMIHRSTSQGSINSPVYSRHSYTPTT	2	NaN	-0.0535386	NaN	-0.467514	NaN	NaN	S	2	0.999944	0.000774346	132.14	42.5788	0	NaN
J3QSX6;Q5JVV3;F8W8M4;Q5T6N4;O14639-3;O14639-5;Q5T6N2;O14639-2;O14639;H0Y3K7;O14639-4;H0Y7N6;F6XFR5	147;147;375;463;119;147;403;375;435;375;93;100;119	J3QSX6	Actin-binding LIM protein 1	ABLIM1	0	NaN	RQSLGESPRTLSPTPSAEGYQDVRDRMIHRS	2	NaN	-0.0535386	NaN	-0.467514	NaN	NaN	S	2	0.999	0.000895215	125.04	30.0006	0	NaN
J3QSX6;Q5JVV3;F8W8M4;Q5T6N4;O14639-3;O14639-5;Q5T6N2;O14639-2;O14639;H0Y3K7;H0Y7N6;F6XFR5	64;64;292;380;36;64;320;292;352;292;17;36	J3QSX6	Actin-binding LIM protein 1	ABLIM1	1.30463	0.736508	IRRTGRSPSLQPTRTSSESIYSRPGSSIPGS	1	0.740453	-0.0535386	0.211511	-0.467514	0.793991	0.679024	S	2	0.638324	1.52e-05	124.06	3.01456	0.490977	0.475982
J3QSX6;Q5JVV3;F8W8M4;Q5T6N4;O14639-3;O14639-5;Q5T6N2;O14639-2;O14639;H0Y3K7;H0Y7N6;F6XFR5	63;63;291;379;35;63;319;291;351;291;16;35	J3QSX6	Actin-binding LIM protein 1	ABLIM1	0.856733	0.58576	LIRRTGRSPSLQPTRTSSESIYSRPGSSIPG	1	0.402176	-0.0535386	0.248292	-0.467514	0.455715	0.715805	T	2	0.816281	1.52e-05	124.06	6.96115	0.830064	0.325234
J3QSX6;Q5JVV3;F8W8M4;Q5T6N4;O14639-3;O14639-5;Q5T6N2;O14639-2;O14639;H0Y3K7;H0Y7N6;F6XFR5	79;79;307;395;51;79;335;307;367;307;32;51	J3QSX6	Actin-binding LIM protein 1	ABLIM1	0.803977	0.537145	SSESIYSRPGSSIPGSPGHTIYAKVDNEILD	1	0.348346	-0.0535386	0.204892	-0.467514	0.401884	0.672405	S	2	0.998203	0.000216455	139.46	27.45	0.791781	0.276619
J3QSX6;Q5JVV3;F8W8M4;Q5T6N4;O14639-3;O14639-5;Q5T6N2;O14639-2;O14639;H0Y3K7;O14639-4	347;422;610;738;319;347;640;610;670;610;293	J3QSX6	Actin-binding LIM protein 1	ABLIM1	0.357804	0.518335	SLPGYGRNGLHRPVSTDFAQYNSYGDVSGGV	1	0.0377336	-0.0535386	0.477884	-0.467514	0.0912722	0.945398	T	3	0.580744	3.3e-05	111.89	1.41506	0.346945	0.257809
J3QSX6;Q5JVV3;F8W8M4;Q5T6N4;O14639-3;O14639-5;Q5T6N2;O14639-2;O14639;H0Y3K7;O14639-4;H0Y7N6;F6XFR5	143;143;371;459;115;143;399;371;431;371;89;96;115	J3QSX6	Actin-binding LIM protein 1	ABLIM1	0.448008	0.343477	DKQERQSLGESPRTLSPTPSAEGYQDVRDRM	1;2	0.0746424	-0.0535386	0.0912598	-0.467514	0.128181	0.558773	S	2	0.999959	0.000331452	166.6	45.1725	1.19686	0.0829511
J3QSX6;Q5JVV3;F8W8M4;Q5T6N4;O14639-3;O14639-5;Q5T6N2;O14639-2;O14639;H0Y3K7;O14639-4;H0Y7N6;F6XFR5	164;164;392;480;136;164;420;392;452;392;110;117;136	J3QSX6	Actin-binding LIM protein 1	ABLIM1	0.16588	0.280333	EGYQDVRDRMIHRSTSQGSINSPVYSRHSYT	1;2	-0.287959	-0.0535386	0.327572	-0.467514	-0.23442	0.795086	S	2	0.998814	0.000774346	132.14	31.7419	0.0181425	0.0198067
J3QSX6;Q5JVV3;F8W8M4;Q5T6N4;O14639-3;O14639-5;Q5T6N2;O14639-2;O14639;H0Y3K7;O14639-4	332;407;595;723;304;332;625;595;655;595;278	J3QSX6	Actin-binding LIM protein 1	ABLIM1	0.279318	0.117936	SPINSASHIPSSKTASLPGYGRNGLHRPVST	1	-0.0634393	-0.0535386	-0.221741	-0.467514	-0.00990072	0.245773	S	2	0.999728	0.00374487	115.89	35.6471	0.49133	-0.14259
J3QSX6;Q5JVV3;F8W8M4;Q5T6N4;O14639-3;O14639-5;Q5T6N2;O14639-2;O14639;H0Y3K7;O14639-4	263;338;526;654;235;263;556;526;586;526;209	J3QSX6	Actin-binding LIM protein 1	ABLIM1	0.0647515	-0.0318452	GPPSFAVVGPDMKRRSSGREEDDEELLRRRQ	1	0.0586628	-0.0535386	-0.643405	-0.467514	0.112201	-0.175892	S	2	0.831155	0.00598691	107.98	6.92194	0.253456	-0.292371
J3QSX6;Q5JVV3;F8W8M4;Q5T6N4;O14639-3;O14639-5;Q5T6N2;O14639-2;O14639;O14639-4	383;458;646;774;355;383;676;646;706;329	J3QSX6	Actin-binding LIM protein 1	ABLIM1	0.290704	-0.188509	LPDGHMPAMRMDRGVSMPNMLEPKIFPYEML	1	-0.437819	-0.0535386	-0.460251	-0.467514	-0.38428	0.0072629	S	2	1	0.00327382	124.81	80.5075	1.79865	-0.449035
Q12979-4;Q12979;I3L4Y1;I3L259;I3L2L3	26;72;26;26;26	Q12979-4	Active breakpoint cluster region-related protein	ABR	0	0.53344	SPQLSARSQGGGDGVSPTPPEGLAPGVEAGK	1	NaN	0.0980152	0.555914	0.0224743	NaN	0.53344	S	2	0.910457	0.000927971	71.117	10.5907	0	0.555914
Q13085;Q13085-4;Q13085-2;Q13085-3	1257;1294;1199;1179	Q13085	Acetyl-CoA carboxylase 1;Biotin carboxylase	ACACA	0	NaN	FEDFVRIFDEVMGCFSDSPPQSPTFPEAGHT		NaN	-0.137489	NaN	-0.143245	NaN	NaN	S	3	0.496681	0.000183808	64.726	0	0	NaN
Q13085;Q13085-4;D3YTK0;K7EJ22	23;60;23;23	Q13085	Acetyl-CoA carboxylase 1;Biotin carboxylase	ACACA	1.17302	2.28042	AQPLELNQHSRFIIGSVSEDNSEDEISNLVK	1;2	1.90153	-0.137489	2.37857	-0.143245	2.03902	2.52181	S	2	0.999876	3.09e-07	186.92	39.0492	1.15081	2.14005
Q13085;Q13085-4;Q13085-2	80;117;22	Q13085	Acetyl-CoA carboxylase 1;Biotin carboxylase	ACACA	1.63523	1.20687	SSLQDGLALHIRSSMSGLHLVKQGRDRKKID	1	1.02545	-0.137489	1.10755	-0.143245	1.16294	1.2508	S	2	0.999975	0.00164864	199.15	46.6492	1.61098	1.0665
Q13085;Q13085-4;D3YTK0	50;87;50	Q13085	Acetyl-CoA carboxylase 1;Biotin carboxylase	ACACA	1.21112	0.724967	NLVKLDLLEEKEGSLSPASVGSDTLSDLGIS	1	0.657732	-0.137489	0.511468	-0.143245	0.795221	0.654713	S	3	0.547055	4.22e-09	163.82	0.819917	1.10112	0.5846
Q13085;Q13085-4;D3YTK0;K7EJ22	29;66;29;29	Q13085	Acetyl-CoA carboxylase 1;Biotin carboxylase	ACACA	0.187464	-0.0573704	NQHSRFIIGSVSEDNSEDEISNLVKLDLLEE	1;2	-0.288294	-0.137489	-0.107182	-0.143245	-0.150805	0.0360637	S	2	0.999891	3.91e-08	203.72	39.6202	0.563203	-0.197738
Q13085;Q13085-4;Q13085-2;Q13085-3	1259;1296;1201;1181	Q13085	Acetyl-CoA carboxylase 1;Biotin carboxylase	ACACA	0	-2.11178	DFVRIFDEVMGCFSDSPPQSPTFPEAGHTSL	1	-2.24927	-0.137489	NaN	-0.143245	-2.11178	NaN	S	3	0.763384	1.42e-08	109.13	5.51067	0	-2.24927
Q9H845;H0Y8Z9	322;85	Q9H845	Acyl-CoA dehydrogenase family member 9, mitochondrial	ACAD9	0	NaN	MGSVVAGLLKRLIEMTAEYACTRKQFNKRLS	2	NaN	-0.121455	NaN	-0.102264	NaN	NaN	T	3	0.690164	0.0266105	45.433	0.890259	0	NaN
Q9H845;H0Y8Z9	328;91	Q9H845	Acyl-CoA dehydrogenase family member 9, mitochondrial	ACAD9	0	NaN	GLLKRLIEMTAEYACTRKQFNKRLSEFGLIQ	2	NaN	-0.121455	NaN	-0.102264	NaN	NaN	T	3	0.690164	0.0266105	45.433	0.890259	0	NaN
Q15057	379	Q15057	Arf-GAP with coiled-coil, ANK repeat and PH domain-containing protein 2	ACAP2	0	0.417925	YREKGDESEKLDKKSSPSTGSLDSGNESKEK	1	NaN	NaN	-0.0941563	-0.512081	NaN	0.417925	S	2	0.913074	1.85e-06	212.06	10.2157	0	-0.0941563
Q15057;H7C3K3	521;80	Q15057	Arf-GAP with coiled-coil, ANK repeat and PH domain-containing protein 2	ACAP2	0	0.414935	KYVERKFVDKYSISLSPPEQQKKFVSKSSEE	1	0.223299	NaN	-0.0971469	-0.512081	NaN	0.414935	S	2	0.999956	0.000287635	219.95	43.637	0.118478	0.0630761
Q9H3P7	43	Q9H3P7	Golgi resident protein GCP60	ACBD3	1.94722	-0.426847	GAEGAPLLPPPLPPPSPPGSGRGPGASGEQP	1	-0.56734	-0.148065	-0.499789	-0.0653703	-0.419275	-0.434419	S	4	0.878926	6.51e-23	230.91	8.62409	1.39529	-0.533565
Q96AP0;R4GNJ5;Q96AP0-2	110;31;110	Q96AP0	Adrenocortical dysplasia protein homolog	ACD	0	NaN	LRPWIRELILGSETPSSPRAGQLLEVLQDAE	1	-0.3454	NaN	1.43978	NaN	NaN	NaN	S	2	0.511417	0.000606459	176.49	0.210543	0.18716	0.547192
Q96AP0;R4GNJ5;Q96AP0-2	111;32;111	Q96AP0	Adrenocortical dysplasia protein homolog	ACD	0	NaN	RPWIRELILGSETPSSPRAGQLLEVLQDAEA	1	1.65563	NaN	NaN	NaN	NaN	NaN	S	2	0.635942	0.00014007	180.1	3.60879	0	1.65563
Q96AP0;R4GNJ5;Q96AP0-2;R4GND4	425;343;422;283	Q96AP0	Adrenocortical dysplasia protein homolog	ACD	0	NaN	ATLTPRSPHASRTPSSPLQSCTPSLSPRSHV	1;2	-0.153687	NaN	-0.456207	NaN	NaN	NaN	S	2	0.911755	0.000249673	163.15	10.189	0.532929	-0.304947
Q96AP0;R4GNJ5;Q96AP0-2;R4GND4	433;351;430;291	Q96AP0	Adrenocortical dysplasia protein homolog	ACD	0	NaN	HASRTPSSPLQSCTPSLSPRSHVPSPHQALV		NaN	NaN	NaN	NaN	NaN	NaN	S	2	0.409735	0.0181158	61.942	0	0	NaN
Q96AP0;R4GNJ5;Q96AP0-2;R4GND4	435;353;432;293	Q96AP0	Adrenocortical dysplasia protein homolog	ACD	0	NaN	SRTPSSPLQSCTPSLSPRSHVPSPHQALVTR	2	NaN	NaN	NaN	NaN	NaN	NaN	S	2	0.984335	0.000249673	163.15	18.5882	0	NaN
Q9UKV3-5;S4R3H4;E7EQT4;Q9UKV3	664;606;624;664	Q9UKV3-5;S4R3H4	Apoptotic chromatin condensation inducer in the nucleus	ACIN1	0	NaN	SSNSRKSLSPGVSRDSSTSYTETKDPSSGQE	3	NaN	-1.44e-05	NaN	0.00216244	NaN	NaN	S	2	0.822244	0.00108163	79.591	9.88068	0	NaN
Q9UKV3-5	885	Q9UKV3-5	Apoptotic chromatin condensation inducer in the nucleus	ACIN1	0	NaN	LKEAVVDLHADDSRISEDETERNGDDGTHDK	1	0.216238	NaN	0.276675	NaN	NaN	NaN	S	2	0.999968	2.24e-23	316.98	44.8859	1.10974	0.246456
Q9UKV3-5;S4R3H4;E7EQT4;Q9UKV3	481;423;441;481	Q9UKV3-5;S4R3H4	Apoptotic chromatin condensation inducer in the nucleus	ACIN1	0	NaN	VSQHTVQLVGGLSPLSSPSDTKAESPAEKVP		NaN	-1.44e-05	NaN	0.00216244	NaN	NaN	S	3	0.468401	0.000146985	66.294	0.52804	0	NaN
Q9UKV3-5	825	Q9UKV3-5	Apoptotic chromatin condensation inducer in the nucleus	ACIN1	0	NaN	EKKESSLPKSFKRKISVVSTKGVPAGNSDTE	1	1.17862	NaN	NaN	NaN	NaN	NaN	S	2	0.999845	0.00558699	101.56	38.1399	0	1.17862
Q9UKV3-5;S4R3H4;E7EQT4;Q9UKV3	714;656;674;714	Q9UKV3-5;S4R3H4	Apoptotic chromatin condensation inducer in the nucleus	ACIN1	0	NaN	TSSSSVQARRLSQPESAEKHVTQRLQPERGS	2	NaN	-1.44e-05	NaN	0.00216244	NaN	NaN	S	2	1	0.00153499	153.41	89.2316	0	NaN
Q9UKV3-5;S4R3H4;E7EQT4;Q9UKV3	384;326;344;384	Q9UKV3-5;S4R3H4	Apoptotic chromatin condensation inducer in the nucleus	ACIN1	0	NaN	EEEREIKSSQGLKEKSKSPSPPRLTEDRKKA	3	NaN	-1.44e-05	NaN	0.00216244	NaN	NaN	S	2	1	0.040361	65.895	58.1158	0	NaN
Q9UKV3-5;S4R3H4;E7EQT4;Q9UKV3	386;328;346;386	Q9UKV3-5;S4R3H4	Apoptotic chromatin condensation inducer in the nucleus	ACIN1	0	NaN	EREIKSSQGLKEKSKSPSPPRLTEDRKKASL	3	NaN	-1.44e-05	NaN	0.00216244	NaN	NaN	S	2	1	0.040361	65.895	58.1158	0	NaN
Q9UKV3-5;S4R3H4;E7EQT4;Q9UKV3	388;330;348;388	Q9UKV3-5;S4R3H4	Apoptotic chromatin condensation inducer in the nucleus	ACIN1	0	NaN	EIKSSQGLKEKSKSPSPPRLTEDRKKASLVA	3	NaN	-1.44e-05	NaN	0.00216244	NaN	NaN	S	2	1	0.040361	65.895	58.1158	0	NaN
Q9UKV3-5;S4R3H4;E7EQT4;Q9UKV3	655;597;615;655	Q9UKV3-5;S4R3H4	Apoptotic chromatin condensation inducer in the nucleus	ACIN1	0	NaN	RSRSRSRSASSNSRKSLSPGVSRDSSTSYTE	2;3	NaN	-1.44e-05	NaN	0.00216244	NaN	NaN	S	2	1	0.00108163	128.33	116.408	0	NaN
Q9UKV3-5;S4R3H4;E7EQT4;Q9UKV3;Q9UKV3-3;Q9UKV3-2	1316;1271;1289;1329;571;602	Q9UKV3-5;S4R3H4	Apoptotic chromatin condensation inducer in the nucleus	ACIN1	0	NaN	RERDRRDTKRHSRSRSRSTPVRDRGGRR___	2;3	NaN	-1.44e-05	NaN	0.00216244	NaN	NaN	S	2	1	0.0018485	91.313	66.7955	0	NaN
Q9UKV3-5;S4R3H4;E7EQT4;Q9UKV3;Q9UKV3-3;Q9UKV3-2	1318;1273;1291;1331;573;604	Q9UKV3-5;S4R3H4	Apoptotic chromatin condensation inducer in the nucleus	ACIN1	0	NaN	RDRRDTKRHSRSRSRSTPVRDRGGRR_____	3	NaN	-1.44e-05	NaN	0.00216244	NaN	NaN	S	2	1	0.0018485	83.511	66.7955	0	NaN
Q9UKV3-5;S4R3H4;E7EQT4;Q9UKV3;Q9UKV3-3;Q9UKV3-2	1319;1274;1292;1332;574;605	Q9UKV3-5;S4R3H4	Apoptotic chromatin condensation inducer in the nucleus	ACIN1	0	NaN	DRRDTKRHSRSRSRSTPVRDRGGRR______	2;3	NaN	-1.44e-05	NaN	0.00216244	NaN	NaN	T	2	1	0.0018485	91.313	66.7955	0	NaN
S4R3H4;E7EQT4;Q9UKV3;Q9UKV3-3;Q9UKV3-2	767;785;825;67;98	S4R3H4	Apoptotic chromatin condensation inducer in the nucleus	ACIN1	1.82856	1.66948	EKKESSLPKSFKRKISVVSATKGVPAGNSDT	1	1.63054	-1.44e-05	1.71057	0.00216244	1.63056	1.70841	S	2	0.999994	0.00243511	139.05	52.4604	1.81687	1.67056
Q9UKV3-5;S4R3H4;E7EQT4;Q9UKV3	365;307;325;365	Q9UKV3-5;S4R3H4	Apoptotic chromatin condensation inducer in the nucleus	ACIN1	1.81528	1.24767	SHLARQQQEKEMKTTSPLEEEEREIKSSQGL	1	1.21766	-1.44e-05	1.27983	0.00216244	1.21768	1.27767	S	2	0.999796	0.000366557	139	37.6684	1.80018	1.24875
Q9UKV3-5;S4R3H4;E7EQT4;Q9UKV3	561;503;521;561	Q9UKV3-5;S4R3H4	Apoptotic chromatin condensation inducer in the nucleus	ACIN1	0.895908	1.1442	CLKQPSLEQKEGRRASHTLLPSHRLKQSADS	1	1.37568	-1.44e-05	0.914871	0.00216244	1.37569	0.912708	S	2	0.998728	0.00662299	67.252	28.9515	0.898298	1.14527
Q9UKV3-5;S4R3H4;E7EQT4;Q9UKV3	698;640;658;698	Q9UKV3-5;S4R3H4	Apoptotic chromatin condensation inducer in the nucleus	ACIN1	0	1.12956	PPVPQLQVCEPKERTSTSSSSVQARRLSQPE		1.12955	-1.44e-05	NaN	0.00216244	1.12956	NaN	S	2	0.792205	0.0234885	98.281	6.92547	0	1.12955
Q9UKV3-5;S4R3H4;E7EQT4;Q9UKV3	710;652;670;710	Q9UKV3-5;S4R3H4	Apoptotic chromatin condensation inducer in the nucleus	ACIN1	1.69164	0.980013	ERTSTSSSSVQARRLSQPESAEKHVTQRLQP	1;2	0.948676	-1.44e-05	1.0135	0.00216244	0.94869	1.01134	S	2	1	0.00153499	232.35	78.8264	1.67729	0.981087
Q9UKV3-5;S4R3H4;E7EQT4;Q9UKV3;Q9UKV3-3;Q9UKV3-2	862;805;823;863;105;136	Q9UKV3-5;S4R3H4	Apoptotic chromatin condensation inducer in the nucleus	ACIN1	0.413298	0.881906	KRRWGASTATTQKKPSISITTESLKEAVVDL;KRRWGASTATTQKKPSISITTESLKSLIPDI	1	0.27011	-1.44e-05	1.49585	0.00216244	0.270125	1.49369	S	2	0.999998	2.61e-07	213.35	56.9405	0.41311	0.882979
Q9UKV3-5;S4R3H4;E7EQT4;Q9UKV3	240;182;200;240	Q9UKV3-5;S4R3H4	Apoptotic chromatin condensation inducer in the nucleus	ACIN1	0.704123	0.633565	ERRSSRVRQARAAKLSEGSQPAEEEEDQETP	1;2	0.430285	-1.44e-05	0.838992	0.00216244	0.4303	0.83683	S	2	1	1.23e-18	304.68	165.055	0.70264	0.634639
Q9UKV3-5;S4R3H4;E7EQT4;Q9UKV3	400;342;360;400	Q9UKV3-5;S4R3H4	Apoptotic chromatin condensation inducer in the nucleus	ACIN1	1.41116	0.624563	KSPSPPRLTEDRKKASLVALPEQTASEEETP	1	0.662661	-1.44e-05	0.588613	0.00216244	0.662676	0.58645	S	3	0.999999	4.37e-06	132.35	59.1817	1.42446	0.625637
Q9UKV3-5;S4R3H4;E7EQT4;Q9UKV3	682;624;642;682	Q9UKV3-5;S4R3H4	Apoptotic chromatin condensation inducer in the nucleus	ACIN1	1.60912	0.599468	SYTETKDPSSGQEVATPPVPQLQVCEPKERT	1	0.57628	-1.44e-05	0.624803	0.00216244	0.576295	0.62264	T	2	0.999464	9.93e-05	75.718	34.054	1.58999	0.600542
Q9UKV3-5;S4R3H4;E7EQT4;Q9UKV3;Q9UKV3-3;Q9UKV3-2	974;929;947;987;229;260	Q9UKV3-5;S4R3H4	Apoptotic chromatin condensation inducer in the nucleus	ACIN1	0.376167	0.579474	TLGDTLTRRSISQQKSGVSITIDDPVRTAQV	1	1.02977	-1.44e-05	0.131326	0.00216244	1.02978	0.129164	S	2	0.998841	0.00036145	113.53	29.354	0.377529	0.580548
Q9UKV3-5;S4R3H4;E7EQT4;Q9UKV3	414;356;374;414	Q9UKV3-5;S4R3H4	Apoptotic chromatin condensation inducer in the nucleus	ACIN1	2.02789	0.578473	ASLVALPEQTASEEETPPPLLTKEASSPPPH	1;2	0.586981	-1.44e-05	0.572114	0.00216244	0.586995	0.569951	T	3	0.989364	3.78e-05	98.491	22.6577	2.08803	0.579547
Q9UKV3-5;S4R3H4;E7EQT4;Q9UKV3	482;424;442;482	Q9UKV3-5;S4R3H4	Apoptotic chromatin condensation inducer in the nucleus	ACIN1	0.374414	0.506146	SQHTVQLVGGLSPLSSPSDTKAESPAEKVPE	1;2	0.110631	-1.44e-05	0.90381	0.00216244	0.110645	0.901647	S	3	0.879637	1.46e-09	181.81	9.81292	0.374214	0.50722
Q9UKV3-5;S4R3H4;E7EQT4;Q9UKV3	490;432;450;490	Q9UKV3-5;S4R3H4	Apoptotic chromatin condensation inducer in the nucleus	ACIN1	0.911209	0.457499	GGLSPLSSPSDTKAESPAEKVPEESVLPLVQ	1	0.546759	-1.44e-05	0.370388	0.00216244	0.546773	0.368225	S	3	1	1.96e-06	175.99	81.4482	0.917401	0.458573
Q9UKV3-5;S4R3H4;E7EQT4;Q9UKV3	657;599;617;657	Q9UKV3-5;S4R3H4	Apoptotic chromatin condensation inducer in the nucleus	ACIN1	0.779805	0.33457	RSRSRSASSNSRKSLSPGVSRDSSTSYTETK	1;2;3	0.423847	-1.44e-05	0.247442	0.00216244	0.423862	0.245279	S	2	1	0.00108163	128.33	82.5633	0.786227	0.335644
Q9UKV3-5;S4R3H4;E7EQT4;Q9UKV3;Q9UKV3-3;Q9UKV3-2	815;757;775;815;57;88	Q9UKV3-5;S4R3H4	Apoptotic chromatin condensation inducer in the nucleus	ACIN1	0.804992	0.331769	DRPEGSVEDEEKKESSLPKSFKRKISVVSAT;DRPEGSVEDEEKKESSLPKSFKRKISVVSTK	1	0.248413	-1.44e-05	0.417272	0.00216244	0.248428	0.41511	S	2	0.784567	0.010099	123.11	5.61319	0.80093	0.332843
Q9UKV3-5;S4R3H4;E7EQT4;Q9UKV3	729;671;689;729	Q9UKV3-5;S4R3H4	Apoptotic chromatin condensation inducer in the nucleus	ACIN1	1.18929	0.194781	SAEKHVTQRLQPERGSPKKCEAEEAEPPAAT	1	0.214622	-1.44e-05	0.177089	0.00216244	0.214637	0.174926	S	3	1	0.0118704	94.547	46.8795	1.21599	0.195855
S4R3H4;E7EQT4;Q9UKV3;Q9UKV3-3;Q9UKV3-2	840;858;898;140;171	S4R3H4	Apoptotic chromatin condensation inducer in the nucleus	ACIN1	0.41513	0.105849	GQEAVVDLHADDSRISEDETERNGDDGTHDK	1;2	0.0328061	-1.44e-05	0.181039	0.00216244	0.0328206	0.178876	S	2	0.999968	7.3e-73	412.22	44.8859	0.413552	0.106923
Q9UKV3-5;S4R3H4;E7EQT4;Q9UKV3	216;158;176;216	Q9UKV3-5;S4R3H4	Apoptotic chromatin condensation inducer in the nucleus	ACIN1	0	0.0818995	HSPRKSSSISEEKGDSDDEKPRKGERRSSRV	1	0.081885	-1.44e-05	NaN	0.00216244	0.0818995	NaN	S	2	1	0.00419772	200.76	138.991	0	0.081885
Q9UKV3-5;S4R3H4;E7EQT4;Q9UKV3	667;609;627;667	Q9UKV3-5;S4R3H4	Apoptotic chromatin condensation inducer in the nucleus	ACIN1	0	0.0816268	SRKSLSPGVSRDSSTSYTETKDPSSGQEVAT	1	0.0816123	-1.44e-05	NaN	0.00216244	0.0816268	NaN	S	2	0.682686	0.0123564	74.537	5.30846	0	0.0816123
S4R3H4;E7EQT4;Q9UKV3;Q9UKV3-3;Q9UKV3-2	837;855;895;137;168	S4R3H4	Apoptotic chromatin condensation inducer in the nucleus	ACIN1	0	-0.0511118	PLAGQEAVVDLHADDSRISEDETERNGDDGT	1;2	NaN	-1.44e-05	-0.0489494	0.00216244	NaN	-0.0511119	S	3	0.999994	8.36e-22	259.59	52.2616	0	-0.0489494
Q9UKV3-5;S4R3H4;E7EQT4;Q9UKV3;Q9UKV3-3;Q9UKV3-2	991;946;964;1004;246;277	Q9UKV3-5;S4R3H4	Apoptotic chromatin condensation inducer in the nucleus	ACIN1	1.78432	-0.112034	VSITIDDPVRTAQVPSPPRGKISNIVHISNL	1	-0.114941	-1.44e-05	-0.10698	0.00216244	-0.114927	-0.109142	S	2	1	0.00284859	149.93	115.855	1.64151	-0.11096
Q9UKV3-5;S4R3H4;E7EQT4;Q9UKV3	295;237;255;295	Q9UKV3-5;S4R3H4	Apoptotic chromatin condensation inducer in the nucleus	ACIN1	0.359902	-0.187368	EEDDEEEEGDDEGQKSREAPILKEFKEEGEE	1	-0.340715	-1.44e-05	-0.0318724	0.00216244	-0.3407	-0.0340348	S	2	1	0.0365738	105.13	105.133	0.355936	-0.186294
Q9UKV3-5;S4R3H4;E7EQT4;Q9UKV3	243;185;203;243	Q9UKV3-5;S4R3H4	Apoptotic chromatin condensation inducer in the nucleus	ACIN1	0.649175	-0.198514	SSRVRQARAAKLSEGSQPAEEEEDQETPSRN	1;2	-0.125541	-1.44e-05	-0.269338	0.00216244	-0.125527	-0.271501	S	2	1	7.08e-24	327.28	154.023	0.653011	-0.19744
Q9UKV3-5;S4R3H4;E7EQT4;Q9UKV3	328;270;288;328	Q9UKV3-5;S4R3H4	Apoptotic chromatin condensation inducer in the nucleus	ACIN1	0.758056	-0.230272	RVKPEEMMDERPKTRSQEQEVLERGGRFTRS	1	-0.165515	-1.44e-05	-0.292882	0.00216244	-0.165501	-0.295044	S	2	0.996119	0.00701355	178.02	24.0942	0.763126	-0.229198
Q9UKV3-5;S4R3H4;E7EQT4;Q9UKV3;Q9UKV3-3;Q9UKV3-2	837;780;798;838;80;111	Q9UKV3-5;S4R3H4	Apoptotic chromatin condensation inducer in the nucleus	ACIN1	0.374905	-0.276552	KISVVSATKGVPAGNSDTEGGQPGRKRRWGA;RKISVVSTKGVPAGNSDTEGGQPGRKRRWGA	1	-0.0608035	-1.44e-05	-0.490152	0.00216244	-0.0607891	-0.492315	S	2	0.984058	7.11e-05	164.9	17.9049	0.375276	-0.275478
Q9UKV3-5;S4R3H4;E7EQT4;Q9UKV3	666;608;626;666	Q9UKV3-5;S4R3H4	Apoptotic chromatin condensation inducer in the nucleus	ACIN1	0.205193	-0.455611	NSRKSLSPGVSRDSSTSYTETKDPSSGQEVA	1	0.222681	-1.44e-05	-1.13176	0.00216244	0.222695	-1.13392	T	2	0.594839	0.008528	81.565	4.38073	0.205038	-0.454537
Q9UKV3-5;S4R3H4;E7EQT4;Q9UKV3	410;352;370;410	Q9UKV3-5;S4R3H4	Apoptotic chromatin condensation inducer in the nucleus	ACIN1	2.28603	-0.487734	DRKKASLVALPEQTASEEETPPPLLTKEASS	1;2	-0.491713	-1.44e-05	-0.481606	0.00216244	-0.491699	-0.483768	S	3	0.999445	1.7e-09	190.5	33.7976	2.17974	-0.48666
Q9UKV3-5;S4R3H4;E7EQT4;Q9UKV3	478;420;438;478	Q9UKV3-5;S4R3H4	Apoptotic chromatin condensation inducer in the nucleus	ACIN1	1.60905	-0.76444	ELLVSQHTVQLVGGLSPLSSPSDTKAESPAE	1;2	-0.734899	-1.44e-05	-0.791832	0.00216244	-0.734885	-0.793995	S	2	1	5.35e-118	469.48	73.0532	1.62472	-0.763366
Q9UKV3-5;S4R3H4;E7EQT4;Q9UKV3	254;196;214;254	Q9UKV3-5;S4R3H4	Apoptotic chromatin condensation inducer in the nucleus	ACIN1	0.644711	-0.865604	LSEGSQPAEEEEDQETPSRNLRVRADRNLKT	1	-0.543783	-1.44e-05	-1.18528	0.00216244	-0.543768	-1.18744	T	2	0.821955	0.000122733	135.62	6.64317	0.645566	-0.86453
Q9UKV3-5;S4R3H4;E7EQT4;Q9UKV3	665;607;625;665	Q9UKV3-5;S4R3H4	Apoptotic chromatin condensation inducer in the nucleus	ACIN1	0	-0.953257	SNSRKSLSPGVSRDSSTSYTETKDPSSGQEV	1	-0.953271	-1.44e-05	NaN	0.00216244	-0.953257	NaN	S	2	0.958598	0.00245431	100.38	15.4843	0	-0.953271
Q9UKV3-5;S4R3H4;E7EQT4;Q9UKV3;Q9UKV3-3;Q9UKV3-2	1091;1046;1064;1104;346;377	Q9UKV3-5;S4R3H4	Apoptotic chromatin condensation inducer in the nucleus	ACIN1	0	-1.03817	QDELDYHRGLLVDRPSETKTEEQGIPRPLHP	1	-1.03818	-1.44e-05	NaN	0.00216244	-1.03817	NaN	S	2	0.882987	0.0136596	138.55	8.77719	0	-1.03818
P53396;P53396-2;B4E3P0	1100;1090;829	P53396	ATP-citrate synthase	ACLY	0	NaN	RHPWDDISYVLPEHMSM______________	1	NaN	0.00662125	NaN	-0.0238857	NaN	NaN	S	2	1	0.000411222	109.36	75.6943	0	NaN
P53396	481	P53396	ATP-citrate synthase	ACLY	0.92629	0.250121	PAKKAKPAMPQDSVPSPRSLQGKSTTLFSRH	1	0.209641	0.00662125	0.273337	-0.0238857	0.203019	0.297223	S	2	0.999983	0.00030457	190.1	47.7833	1.07843	0.241489
P53396;P53396-2;B4E3P0	455;455;194	P53396	ATP-citrate synthase	ACLY	0.612649	0.115578	NASGSTSTPAPSRTASFSESRADEVAPAKKA	1	0.0756011	0.00662125	0.13829	-0.0238857	0.0689798	0.162176	S	2	0.999999	0.000132543	191.16	60.889	0.741116	0.106946
P53396;P53396-2;B4E3P0;K7EIE7	447;447;186;121	P53396	ATP-citrate synthase	ACLY	1.36988	-0.689845	AHTANFLLNASGSTSTPAPSRTASFSESRAD	1	-0.729531	0.00662125	-0.667424	-0.0238857	-0.736152	-0.643538	T	4	0.878499	2.37e-10	198.12	9.93822	1.54845	-0.698477
Q99798;A2A274	559;584	Q99798	Aconitate hydratase, mitochondrial	ACO2	0.554256	0.45623	YQHPPKDSSGQHVDVSPTSQRLQLLEPFDKW	1	0.636358	-0.0337615	0.182184	-0.0601566	0.670119	0.24234	S	2	0.99477	0.000589076	175.46	23.3866	0.491485	0.409271
Q15067-2;Q15067;I3L2U4;K7ELT1;I3L0T4	26;26;26;26;26	Q15067-2	Peroxisomal acyl-coenzyme A oxidase 1	ACOX1	0	0.208708	SASFNPELLTHILDGSPEKTRRRREIENMIL	1	-0.111508	-0.320216	NaN	-0.120012	0.208708	NaN	S	2	1	2.01e-19	280.96	109.201	0	-0.111508
Q9NR19;Q9NR19-2;E7EWU3	265;265;215	Q9NR19	Acetyl-coenzyme A synthetase, cytoplasmic	ACSS2	0	NaN	VKHLGRAELGMGDSTSQSPPIKRSCPDVQIS		NaN	-0.312939	NaN	-0.739276	NaN	NaN	S	2	0.473782	0.0454728	48.616	0	0	NaN
Q9NR19;Q9NR19-2;E7EWU3	267;267;217	Q9NR19	Acetyl-coenzyme A synthetase, cytoplasmic	ACSS2	0.741218	0.840713	HLGRAELGMGDSTSQSPPIKRSCPDVQISWN	1	0.281431	-0.312939	0.347779	-0.739276	0.594371	1.08706	S	2	0.9985	0.00092899	127.01	28.4661	1.17469	0.314605
Q9NR19;Q9NR19-2;F8WCJ4;C9JXD9;C9IYL0;B4DEH9;C9JY31	30;30;30;30;30;30;30	Q9NR19	Acetyl-coenzyme A synthetase, cytoplasmic	ACSS2	0.277013	0.228692	RGQEEAGAGGRARSWSPPPEVSRSAHVPSLQ	1	-0.334334	-0.312939	-0.260497	-0.739276	-0.021395	0.478778	S	2	0.999968	0.00405001	116.71	44.9072	1.10446	-0.297416
P60709;G5E9R0;E7EVS6;C9JZR7;C9JTX5;P63261;I3L3I0;I3L1U9;I3L4N8;I3L3R2;J3KT65;K7EM38;C9JUM1;P68032;P63267;P68133;P62736;Q5T8M8;A6NL76;Q5T8M7;C9JFL5;F6UVQ4;F6QUT6;F8WB63;B8ZZJ2	60;60;60;60;60;60;60;60;51;60;60;60;63;62;61;62;62;62;62;62;61;62;62;61;61	P60709;P63261;P68032	Actin, cytoplasmic 1;Actin, cytoplasmic 1, N-terminally processed;Actin, cytoplasmic 2;Actin, cytoplasmic 2, N-terminally processed;Actin, alpha cardiac muscle 1;Actin, gamma-enteric smooth muscle;Actin, alpha skeletal muscle;Actin, aortic smooth muscle	ACTB;ACTG1;ACTC1;ACTG2;ACTA1;ACTA2	0	0.241123	VGMGQKDSYVGDEAQSKRGILTLKYPIEHGI	1	0.215741	-0.0253826	NaN	0.0223323	0.241123	NaN	S	2	1	0.000720301	111.81	97.58	0	0.215741
P60709;P63261;P68032;P63267;P68133;P62736;Q5T8M8;A6NL76;Q5T8M7;P63267-2	323;323;325;324;325;325;235;237;290;281	P60709;P63261;P68032	Actin, cytoplasmic 1;Actin, cytoplasmic 1, N-terminally processed;Actin, cytoplasmic 2;Actin, cytoplasmic 2, N-terminally processed;Actin, alpha cardiac muscle 1;Actin, gamma-enteric smooth muscle;Actin, alpha skeletal muscle;Actin, aortic smooth muscle	ACTB;ACTG1;ACTC1;ACTG2;ACTA1;ACTA2	0.0823872	-0.0540941	GIADRMQKEITALAPSTMKIKIIAPPERKYS	1	0.1149	-0.0253826	-0.226139	0.0223323	0.140283	-0.248471	S	2	0.805379	0.000564931	128.95	6.16811	0.0973027	-0.0556193
P60709;P63261;I3L4N8;Q6S8J3	232;232;223;932	P60709;P63261	Actin, cytoplasmic 1;Actin, cytoplasmic 1, N-terminally processed;Actin, cytoplasmic 2;Actin, cytoplasmic 2, N-terminally processed;POTE ankyrin domain family member E	ACTB;ACTG1;POTEE	0	NaN	CYVALDFEQEMATAASSSSLEKSYELPDGQV		NaN	0.0329386	NaN	0.0526537	NaN	NaN	S	3	0.387969	0.00149042	63.138	0	0	NaN
P60709;P63261;I3L4N8;Q6S8J3	233;233;224;933	P60709;P63261	Actin, cytoplasmic 1;Actin, cytoplasmic 1, N-terminally processed;Actin, cytoplasmic 2;Actin, cytoplasmic 2, N-terminally processed;POTE ankyrin domain family member E	ACTB;ACTG1;POTEE	0.841414	1.06843	YVALDFEQEMATAASSSSLEKSYELPDGQVI	1	1.34738	0.0329386	0.875072	0.0526537	1.31444	0.822419	S	3	0.672662	1.56e-06	164.39	4.88513	0.875139	1.11123
P60709;P63261;Q6S8J3;A5A3E0;Q9BYX7;P68032;P63267;P68133;P62736;Q5T8M8;A6NL76;Q5T8M7;P63267-2;Q562R1	239;239;939;939;239;241;240;241;241;151;153;206;197;240	P60709;P63261;P68032;Q562R1	Actin, cytoplasmic 1;Actin, cytoplasmic 1, N-terminally processed;Actin, cytoplasmic 2;Actin, cytoplasmic 2, N-terminally processed;POTE ankyrin domain family member E;POTE ankyrin domain family member F;Putative beta-actin-like protein 3;Putative beta-actin-like protein 3, N-terminally processed;Actin, alpha cardiac muscle 1;Actin, gamma-enteric smooth muscle;Actin, alpha skeletal muscle;Actin, …	ACTB;ACTG1;POTEE;POTEF;POTEKP;ACTC1;ACTG2;ACTA1;ACTA2;ACTBL2	0.787958	0.280385	ENEMATAASSSSLEKSYELPDGQVITIGNER;EQEMATAASSSSLEKSYELPDGQVITIGNER;EQEMVRAAASSSPERSYELPDGQVITIGNER	1	0.328377	-0.0253826	0.229342	0.0223323	0.35376	0.20701	S	2	0.999598	0.00117053	93.776	33.9515	0.951249	0.278859
O96019;O96019-2	233;191	O96019	Actin-like protein 6A	ACTL6A	0.507185	0.553191	VPPYMIASKEAVREGSPANWKRKEKLPQVTR	1	0.136848	-0.122287	0.740625	-0.106622	0.259135	0.847248	S	2	1	0.00515362	128.95	81.525	0.416029	0.438736
Q9NZ32;H0YJD9	414;146	Q9NZ32	Actin-related protein 10	ACTR10	0	0.541191	FDVGKTQPPLMKRAFSTEK____________	1	0.480989	-0.0602017	NaN	-0.0443896	0.541191	NaN	S	2	0.705386	0.0478882	60.899	3.79174	0	0.480989
Q9H981;Q9H981-2;C9J7L6	132;21;21	Q9H981	Actin-related protein 8	ACTR8	0.0168498	0.00891491	IWSKKMSNGTRRIPVSPEQARSYNKQMRPAI	1	0.108491	0.248535	0.144568	-0.0133051	-0.140044	0.157874	S	2	1	0.00341033	141.59	71.5314	1.04502	0.12653
Q9H981;Q9H981-2;H0Y849;Q9H981-3	412;301;166;117	Q9H981	Actin-related protein 8	ACTR8	0.189232	-0.164674	TFGIVGQKMTTLQHRSQGDPEDPHDEHYLLA	1	-0.181853	0.248535	0.0877344	-0.0133051	-0.430388	0.10104	S	2	1	2.13e-07	171.29	108.152	0.104486	-0.0470593
B4DNW0;Q03154-2;Q03154;Q03154-3;Q03154-4;C9JMV9	427;265;337;272;302;438	B4DNW0	Aminoacylase-1	ACY1;ABHD14A-ACY1	0	NaN	PWWAAFSRVCKDMNLTLEPEIMPAATDNRYI	2	NaN	-0.254892	NaN	-0.325087	NaN	NaN	T	2	1	0.0134584	41.16	41.1603	0	NaN
B4DNW0;Q03154-2;Q03154;Q03154-3;Q03154-4;C9JMV9	437;275;347;282;312;448	B4DNW0	Aminoacylase-1	ACY1;ABHD14A-ACY1	0	NaN	KDMNLTLEPEIMPAATDNRYIRAVGVPALGF	2	NaN	-0.254892	NaN	-0.325087	NaN	NaN	T	2	1	0.0134584	41.16	41.1603	0	NaN
P78536	791	P78536	Disintegrin and metalloproteinase domain-containing protein 17	ADAM17	0	NaN	GFEKDPFPNSSTAAKSFEDLTDHPVTRSEKA	1	-0.541912	NaN	-0.113489	NaN	NaN	NaN	S	2	1	0.000304588	257.04	147.424	0.433472	-0.3277
P78536	735	P78536	Disintegrin and metalloproteinase domain-containing protein 17	ADAM17	0	NaN	DSASVRIIKPFPAPQTPGRLQPAPVIPSAPA	1	-0.0404375	NaN	0.100978	NaN	NaN	NaN	T	2	1	0.0164598	64.121	64.1212	0.129309	0.0302701
H7C3I4;H7C0Q9;G5E951;Q9P0K1-4;Q9P0K1-3;Q9P0K1-5;Q9P0K1-2;Q9P0K1	163;192;798;798;834;798;798;834	H7C3I4	Disintegrin and metalloproteinase domain-containing protein 22	ADAM22	0	NaN	KHISDICENGRPRSNSWQGNLGGNKKKIRGK	1	-0.0591041	NaN	0.215244	NaN	NaN	NaN	S	2	0.999237	0.00210541	117.08	31.1716	0.173533	0.0780698
Q13443	758	Q13443	Disintegrin and metalloproteinase domain-containing protein 9	ADAM9	0	NaN	QANPSRQPGSVPRHVSPVTPPREVPIYANRF	1;2	-0.352787	NaN	-0.568024	NaN	NaN	NaN	S	2	1	0.00229665	128.88	90.6136	0.835101	-0.460405
Q13443	761	Q13443	Disintegrin and metalloproteinase domain-containing protein 9	ADAM9	0	NaN	PSRQPGSVPRHVSPVTPPREVPIYANRFAVP	2	NaN	NaN	NaN	NaN	NaN	NaN	T	2	1	0.00229665	110.31	90.6136	0	NaN
E7ENU4;P55265;P55265-4;P55265-5;H0YCK3;P55265-2;P55265-3	644;601;644;306;596;601;601	E7ENU4	Double-stranded RNA-specific adenosine deaminase	ADAR	2.55964	2.98085	HYSTEKESEKTAESQTPTPSATSFFSGKSPV	1;2	2.92602	-0.041922	2.9557	-0.0380508	2.96794	2.99375	T	2	0.999081	4.18e-08	229.03	30.5927	2.49309	2.94086
E7ENU4;P55265;P55265-4;P55265-5;H0YCK3;P55265-2;P55265-3	657;614;657;319;609;614;614	E7ENU4	Double-stranded RNA-specific adenosine deaminase	ADAR	1.47137	1.74311	SQTPTPSATSFFSGKSPVTTLLECMHKLGNS	1;2	1.60862	-0.041922	1.79764	-0.0380508	1.65054	1.83569	S	2	1	7.95e-11	223.06	65.3629	1.45234	1.70313
E7ENU4;P55265;P55265-4;P55265-5	866;823;866;528	E7ENU4	Double-stranded RNA-specific adenosine deaminase	ADAR	0	0.833984	TPVTGASLRRTMLLLSRSPEAQPKTLPLTGS	1	NaN	-0.041922	0.795933	-0.0380508	NaN	0.833984	S	3	0.631866	0.000401988	100.58	2.35027	0	0.795933
E7ENU4;P55265;P55265-4;P55265-5	868;825;868;530	E7ENU4	Double-stranded RNA-specific adenosine deaminase	ADAR	1.63764	0.428952	VTGASLRRTMLLLSRSPEAQPKTLPLTGSTF	1	0.371503	-0.041922	0.406428	-0.0380508	0.413425	0.444479	S	2	1	1.56e-06	208.52	85.7159	1.54422	0.388965
P78563-3;P78563;C9JUP4;P78563-2;P78563-4;G5E9B4	26;26;26;26;53;54	P78563-3	Double-stranded RNA-specific editase 1	ADARB1	0	NaN	SSSTDVKENRNLDNVSPKDGSTPGPGEGSQL	1	0.499884	NaN	1.06716	NaN	NaN	NaN	S	2	1	0.00903629	101.71	101.712	0.655381	0.78352
Q9BUB4-2;Q9BUB4	42;191	Q9BUB4-2	tRNA-specific adenosine deaminase 1	ADAT1	0	NaN	NLEAPGNERKCEDPDSPVTKKMRLEPGTAAR	1	1.18618	NaN	NaN	NaN	NaN	NaN	S	2	0.999948	0.00253494	149.6	42.8476	0	1.18618
Q9BUB4-2;Q9BUB4	78;227	Q9BUB4-2	tRNA-specific adenosine deaminase 1	ADAT1	0	NaN	AAHHQSFGKQKSGPISPGIHSCDLTVEGLAT	1	0.870661	NaN	0.945008	NaN	NaN	NaN	S	2	0.999703	9.71e-07	167.22	35.2716	1.58413	0.907834
O43306-2;O43306	576;576	O43306-2	Adenylate cyclase type 6	ADCY6	0	NaN	EEKAMLAKLQRTRANSMEGLMPRWVPDRAFS	1	0.182947	NaN	-0.0524461	NaN	NaN	NaN	S	2	1	0.0043816	147.73	100.223	0.168939	0.0652502
O43306-2;O43306	54;54	O43306-2	Adenylate cyclase type 6	ADCY6	0	NaN	CTPRYMSCLRDAEPPSPTPAGPPRCPWQDDA	1	0.101381	NaN	0.00360232	NaN	NaN	NaN	S	2	0.912328	0.00591311	65.47	10.1729	0.321128	0.0524918
O60503	1257	O60503	Adenylate cyclase type 9	ADCY9	0	NaN	YPKCTDHRVIPQHQLSISPDIRVQVDGSIGR	2	NaN	NaN	NaN	NaN	NaN	NaN	S	3	1	0.012722	58.024	58.0243	0	NaN
O60503	1259	O60503	Adenylate cyclase type 9	ADCY9	0	NaN	KCTDHRVIPQHQLSISPDIRVQVDGSIGRSP	2	NaN	NaN	NaN	NaN	NaN	NaN	S	3	1	0.012722	58.024	58.0243	0	NaN
O60503	1269	O60503	Adenylate cyclase type 9	ADCY9	0	NaN	HQLSISPDIRVQVDGSIGRSPTDEIANLVPS		NaN	NaN	NaN	NaN	NaN	NaN	S	3	0.33332	0.0217235	46.862	0	0	NaN
O60503	1273	O60503	Adenylate cyclase type 9	ADCY9	0	NaN	ISPDIRVQVDGSIGRSPTDEIANLVPSVQYV		NaN	NaN	NaN	NaN	NaN	NaN	S	3	0.33332	0.0217235	46.862	0	0	NaN
O60503	1275	O60503	Adenylate cyclase type 9	ADCY9	0	NaN	PDIRVQVDGSIGRSPTDEIANLVPSVQYVDK		NaN	NaN	NaN	NaN	NaN	NaN	T	3	0.33332	0.0217235	46.862	0	0	NaN
P35611;P35611-3;E7EV99;E7ENY0;P35611-2;A2A3N8;Q86XM2;H0Y9H2	481;512;481;512;481;512;481;218	P35611	Alpha-adducin	ADD1	0	NaN	PKSKTKWTKEDGHRTSTSAVPNLFVPLNTNP		NaN	-0.03518	NaN	-0.133401	NaN	NaN	S	3	0.249998	0.00147933	45.357	0	0	NaN
P35611;P35611-3;E7EV99;E7ENY0;P35611-2;A2A3N8;Q86XM2;H0Y9H2	483;514;483;514;483;514;483;220	P35611	Alpha-adducin	ADD1	0	NaN	SKTKWTKEDGHRTSTSAVPNLFVPLNTNPKE		NaN	-0.03518	NaN	-0.133401	NaN	NaN	S	3	0.249998	0.00147933	45.357	0	0	NaN
P35611;P35611-3;E7EV99;E7ENY0;P35611-2;A2A3N8;Q86XM2;H0Y9H2	480;511;480;511;480;511;480;217	P35611	Alpha-adducin	ADD1	0	NaN	SPKSKTKWTKEDGHRTSTSAVPNLFVPLNTN		NaN	-0.03518	NaN	-0.133401	NaN	NaN	T	3	0.249998	0.00147933	45.357	0	0	NaN
P35611;P35611-3;E7EV99;E7ENY0;P35611-2;A2A3N8;Q86XM2;H0Y9H2	482;513;482;513;482;513;482;219	P35611	Alpha-adducin	ADD1	0	NaN	KSKTKWTKEDGHRTSTSAVPNLFVPLNTNPK		NaN	-0.03518	NaN	-0.133401	NaN	NaN	T	3	0.249998	0.00147933	45.357	0	0	NaN
P35611;P35611-3;E7EV99;E7ENY0;P35611-2;A2A3N8;Q86XM2;H0Y9H2	364;364;364;364;364;364;364;70	P35611	Alpha-adducin	ADD1	0	NaN	YKAKSRSPGSPVGEGTGSPPKWQIGEQEFEA	2	NaN	-0.03518	NaN	-0.133401	NaN	NaN	T	2	0.573608	0.000769989	122.64	1.28795	0	NaN
P35611;P35611-3;E7EV99;E7ENY0;P35611-2;A2A3N8;Q86XM2;D6RAH3;D6RF25;D6RJE2	11;11;11;11;11;11;11;11;11;11	P35611	Alpha-adducin	ADD1	0	1.86145	_____MNGDSRAAVVTSPPPTTAPHKERYFD	1	NaN	-0.03518	1.72805	-0.133401	NaN	1.86145	T	3	0.499991	0.00880518	62.287	0	0	1.72805
P35611;P35611-3;E7EV99;E7ENY0;P35611-2;A2A3N8;Q86XM2;D6RAH3;D6RF25;D6RJE2	12;12;12;12;12;12;12;12;12;12	P35611	Alpha-adducin	ADD1	2.87685	1.24623	____MNGDSRAAVVTSPPPTTAPHKERYFDR	1	1.20846	-0.03518	1.11543	-0.133401	1.24364	1.24883	S	2	0.988006	0.000144666	158.17	19.2642	1.59398	1.16194
P35611;P35611-3;E7EV99;E7ENY0;P35611-2;A2A3N8;Q86XM2;D6RAH3	59;59;59;59;59;59;59;59	P35611	Alpha-adducin	ADD1	0.231397	0.527354	DLRQDFNMMEQKKRVSMILQSPAFCEELESM	1	-0.203236	-0.03518	1.08936	-0.133401	-0.168056	1.22276	S	3	0.999974	6.64e-10	191.11	45.7748	0.209419	0.443063
P35611;P35611-3;E7EV99;E7ENY0;P35611-2;A2A3N8;Q86XM2;H0Y9H2;H0YG19	586;617;586;617;586;617;617;323;32	P35611	Alpha-adducin	ADD1	1.05353	0.241705	ELEEYRREVERKQKGSEENLDEAREQKEKSP	1	0.172743	-0.03518	0.142087	-0.133401	0.207924	0.275487	S	2	1	0.00489439	168.45	71.0799	1.20904	0.157415
P35611;P35611-3;E7EV99;E7ENY0;P35611-2;A2A3N8;Q86XM2;H0Y9H2	464;464;464;464;464;464;464;170	P35611	Alpha-adducin	ADD1	0	0.223983	NSGRGDEASEEGQNGSSPKSKTKWTKEDGHR		NaN	-0.03518	0.0905825	-0.133401	NaN	0.223983	S	3	0.571522	0.0115466	58.924	1.25136	0	0.0905825
P35611;P35611-3;E7EV99;E7ENY0;P35611-2;A2A3N8;Q86XM2;H0Y9H2;H0YG19	613;644;613;644;613;644;644;350;59	P35611	Alpha-adducin	ADD1	0	0.17015	EKSPPDQPAVPHPPPSTPIKLEEDLVPEPTT	1	NaN	-0.03518	0.0367495	-0.133401	NaN	0.17015	S	2	0.629786	0.000133296	175.86	2.3074	0	0.0367495
P35611;P35611-3;E7EV99;E7ENY0;P35611-2;A2A3N8;Q86XM2;H0Y9H2;H0YG19	614;645;614;645;614;645;645;351;60	P35611	Alpha-adducin	ADD1	0	0.145543	KSPPDQPAVPHPPPSTPIKLEEDLVPEPTTG	1	0.110363	-0.03518	NaN	-0.133401	0.145543	NaN	T	3	0.777634	1.52e-05	165.58	5.43706	0	0.110363
P35611;P35611-3;E7EV99;E7ENY0;P35611-2;A2A3N8;Q86XM2;H0Y9H2	465;465;465;465;465;465;465;171	P35611	Alpha-adducin	ADD1	0.251145	0.085959	SGRGDEASEEGQNGSSPKSKTKWTKEDGHRT	1	0.154972	-0.03518	-0.151635	-0.133401	0.190152	-0.0182339	S	2	0.992479	1.06e-10	221.9	21.2043	0.00301993	0.00166875
P35611;P35611-3;E7EV99;E7ENY0;P35611-2;A2A3N8;Q86XM2;H0Y9H2	358;358;358;358;358;358;358;64	P35611	Alpha-adducin	ADD1	0.188744	0.0397537	LLNPEKYKAKSRSPGSPVGEGTGSPPKWQIG	1;2	-0.0597355	-0.03518	-0.0293377	-0.133401	-0.0245555	0.104063	S	2	1	6.42e-14	307.46	81.0347	0.67909	-0.0445366
P35611;P35611-3;E7EV99;E7ENY0;P35611-2;A2A3N8;Q86XM2;H0Y9H2	436;436;436;436;436;436;436;142	P35611	Alpha-adducin	ADD1	1.69884	-0.408641	FASDGDSGTCSPLRHSFQKQQREKTRWLNSG	1	-0.430976	-0.03518	-0.554888	-0.133401	-0.395796	-0.421487	S	4	0.999071	4.74e-41	291.51	32.5962	1.09909	-0.492932
P35611;P35611-3;E7EV99;E7ENY0;P35611-2;A2A3N8;Q86XM2;H0Y9H2	366;366;366;366;366;366;366;72	P35611	Alpha-adducin	ADD1	0.692908	-0.850619	AKSRSPGSPVGEGTGSPPKWQIGEQEFEALM	1;2	-1.16634	-0.03518	-0.703478	-0.133401	-1.13116	-0.570077	S	2	0.951508	3.53e-05	208.72	12.9436	0.811111	-0.934909
P35611;P35611-3;E7EV99;E7ENY0;P35611-2;A2A3N8;Q86XM2;H0Y9H2;H0YG19	600;631;600;631;600;631;631;337;46	P35611	Alpha-adducin	ADD1	0	-1.12016	GSEENLDEAREQKEKSPPDQPAVPHPPPSTP	1	-1.15534	-0.03518	NaN	-0.133401	-1.12016	NaN	S	3	1	9.93e-08	176.23	153.231	0	-1.15534
P35611;P35611-3;P35612;Q9UEY8;Q9UEY8-2	726;757;713;693;661	P35611;P35612;Q9UEY8	Alpha-adducin;Beta-adducin;Gamma-adducin	ADD1;ADD2;ADD3	0.524566	0.0754876	PGKSPSKKKKKFRTPSFLKKSKKKSDS____;PSKSPSKKKKKFRTPSFLKKNKKKEKVEA__;PSKSPSKKKKKFRTPSFLKKSKKKEKVES__	1	0.00201835	-0.03518	-0.0196236	-0.133401	0.0371983	0.113777	S	2	0.999973	0.00899063	129.83	45.7427	0.24776	-0.00880265
P35612	693	P35612	Beta-adducin	ADD2	0	NaN	DTSKDKTESVTSGPMSPEGSPSKSPSKKKKK	2	NaN	0.0436244	NaN	0.0507454	NaN	NaN	S	2	0.999929	7.17e-06	199.94	42.8151	0	NaN
P35612	613	P35612	Beta-adducin	ADD2	0	NaN	PASPVQSPAKEAETKSPLVSPSKSLEEGTKK	2	NaN	0.0436244	NaN	0.0507454	NaN	NaN	S	2	1	0.000239606	262.37	103.548	0	NaN
P35612	617	P35612	Beta-adducin	ADD2	0	NaN	VQSPAKEAETKSPLVSPSKSLEEGTKKTETS	2	NaN	0.0436244	NaN	0.0507454	NaN	NaN	S	2	0.999939	0.000239606	262.37	42.1619	0	NaN
P35612	596	P35612	Beta-adducin	ADD2	0	NaN	GEKETAPEEPGSPAKSAPASPVQSPAKEAET	2;3	NaN	0.0436244	NaN	0.0507454	NaN	NaN	S	2	1	0.00053553	145.73	133.927	0	NaN
P35612	600	P35612	Beta-adducin	ADD2	0	NaN	TAPEEPGSPAKSAPASPVQSPAKEAETKSPL	2;3	NaN	0.0436244	NaN	0.0507454	NaN	NaN	S	2	1	0.00053553	145.73	133.927	0	NaN
P35612	604	P35612	Beta-adducin	ADD2	0	NaN	EPGSPAKSAPASPVQSPAKEAETKSPLVSPS	3	NaN	0.0436244	NaN	0.0507454	NaN	NaN	S	2	1	0.00053553	133.93	133.927	0	NaN
P35612	592	P35612	Beta-adducin	ADD2	0.581105	-0.245266	LELDGEKETAPEEPGSPAKSAPASPVQSPAK	1	-0.308859	0.0436244	-0.0873041	0.0507454	-0.352483	-0.13805	S	2	1	0.00181336	153.48	95.4993	0.488619	-0.198082
P35612	697	P35612	Beta-adducin	ADD2	1.16436	-0.76509	DKTESVTSGPMSPEGSPSKSPSKKKKKFRTP	1;2	-0.804098	0.0436244	-0.631712	0.0507454	-0.847723	-0.682458	S	2	0.983448	3.44e-17	235.97	17.7388	1.11879	-0.717905
P35612	701	P35612	Beta-adducin	ADD2	0	-0.800345	SVTSGPMSPEGSPSKSPSKKKKKFRTPSFLK	1;2	-0.756721	0.0436244	NaN	0.0507454	-0.800345	NaN	S	3	0.841137	3.44e-17	235.97	7.39395	0	-0.756721
Q9UEY8;Q9UEY8-2	679;647	Q9UEY8	Gamma-adducin	ADD3	0	NaN	SPEKIEEVLSPEGSPSKSPSKKKKKFRTPSF		NaN	-0.11926	NaN	-0.254479	NaN	NaN	S	2	0.494673	0.0261682	46.249	0	0	NaN
Q9UEY8;Q9UEY8-2	651;619	Q9UEY8	Gamma-adducin	ADD3	0	NaN	HDVEDELAKRVSRLSTSTTIENIEITIKSPE		NaN	-0.11926	NaN	-0.254479	NaN	NaN	T	2	0.450267	0.0187784	48.907	1.22726	0	NaN
Q9UEY8;Q9UEY8-2	673;641	Q9UEY8	Gamma-adducin	ADD3	0	1.82305	IEITIKSPEKIEEVLSPEGSPSKSPSKKKKK	1;2;3	NaN	-0.11926	1.56857	-0.254479	NaN	1.82305	S	2	1	0.000196438	193.72	68.7288	0	1.56857
Q9UEY8;Q9UEY8-2	12;12	Q9UEY8	Gamma-adducin	ADD3	1.73438	1.22209	____MSSDASQGVITTPPPPSMPHKERYFDR	1	1.13823	-0.11926	0.932212	-0.254479	1.25748	1.18669	T	3	0.936202	0.000205016	126.96	11.7314	1.19972	1.03522
Q9UEY8;Q9UEY8-2	64;64	Q9UEY8	Gamma-adducin	ADD3	1.01381	0.921332	FNMMEQRKRVTQILQSPAFREDLECLIQEQM	1	0.943359	-0.11926	0.525568	-0.254479	1.06262	0.780046	S	2	1	3.84e-05	132.31	95.229	0.75348	0.734463
Q9UEY8;Q9UEY8-2	423;423	Q9UEY8	Gamma-adducin	ADD3	0.725284	0.474593	ATVTAFSFEDDTVPLSPLKYMAQRQQREKTR	1	0.210763	-0.11926	0.364685	-0.254479	0.330022	0.619163	S	3	0.993152	8.29e-05	120.37	21.8036	0.778876	0.287724
Q9UEY8;Q9UEY8-2	42;42	Q9UEY8	Gamma-adducin	ADD3	0.469848	0.316902	RINENDPEYIRERNMSPDLRQDFNMMEQRKR	1	0.010923	-0.11926	0.249142	-0.254479	0.130183	0.503621	S	2	1	0.0224585	89.08	70.5516	0.32596	0.130032
Q9UEY8;Q9UEY8-2	461;461	Q9UEY8	Gamma-adducin	ADD3	0	0.196396	YMKVNVPEESRNGETSPRTKITWMKAEDSSK	1	NaN	-0.11926	-0.0580824	-0.254479	NaN	0.196396	S	2	0.684345	0.0201917	77.533	3.36062	0	-0.0580824
Q9UEY8;Q9UEY8-2	681;649	Q9UEY8	Gamma-adducin	ADD3	0.968909	-0.197807	EKIEEVLSPEGSPSKSPSKKKKKFRTPSFLK	1;2;3	-0.283369	-0.11926	-0.485984	-0.254479	-0.164109	-0.231505	S	2	0.975305	2.44e-08	227.6	16.406	0.785325	-0.384676
Q9UEY8;Q9UEY8-2	677;645	Q9UEY8	Gamma-adducin	ADD3	0.567232	-0.200275	IKSPEKIEEVLSPEGSPSKSPSKKKKKFRTP	1;2;3	-0.410294	-0.11926	-0.363995	-0.254479	-0.291034	-0.109516	S	2	0.996684	4.61e-05	207.21	24.5986	1.41997	-0.387144
B1ALU3;O95490-2;O95490-5;H0Y5C0;B1ALU1;O95490;O95490-7;O95490-6;H0Y3V3	1346;1318;1331;1266;1299;1374;1376;1389;386	B1ALU3	Latrophilin-2	ADGRL2;LPHN2	0	NaN	AEDHLQSPNRDSLYTSMPNLRDSPYPESSPD	1	-0.506086	NaN	-0.41448	NaN	NaN	NaN	S	2	0.830429	0.0032911	134.61	6.89991	1.19968	-0.460283
B1ALU3;O95490-2;O95490-5;H0Y5C0;B1ALU1;O95490;O95490-7;O95490-6;H0Y3V3	1402;1374;1387;1322;1355;1430;1432;1445;442	B1ALU3	Latrophilin-2	ADGRL2;LPHN2	0	NaN	AGHQLQMCYQISRGNSDGYIIPINKEGCIPE	1	-0.657878	NaN	-0.473791	NaN	NaN	NaN	S	2	1	0.0013044	157.58	108.129	0.988604	-0.565834
B1ALU3;O95490-2;O95490-5;H0Y5C0;B1ALU1;O95490;O95490-7;O95490-6;H0Y3V3	1337;1309;1322;1257;1290;1365;1367;1380;377	B1ALU3	Latrophilin-2	ADGRL2;LPHN2	0	NaN	SYVSQLTAEAEDHLQSPNRDSLYTSMPNLRD	1	2.11333	NaN	NaN	NaN	NaN	NaN	S	3	1	2.32e-05	140.27	70.2178	0	2.11333
B1ALU3;O95490-2;O95490-5;H0Y5C0;B1ALU1;O95490;O95490-7;O95490-6;H0Y3V3	1306;1278;1291;1226;1259;1334;1336;1349;346	B1ALU3	Latrophilin-2	ADGRL2;LPHN2	0	NaN	HHKELEAPLIPQRTHSLLYQPQKKVKSEGTD	1	-0.403637	NaN	-0.672727	NaN	NaN	NaN	S	2	0.999994	0.00219978	199.95	52.4068	0.806994	-0.538182
P11766	351	P11766	Alcohol dehydrogenase class-3	ADH5	0	-0.0597774	MSKKIKVDEFVTHNLSFDEINKAFELMHSGK	1	-0.159767	-0.0999891	NaN	-0.149137	-0.0597774	NaN	S	2	0.999984	0.000212478	147.35	47.9389	0	-0.159766
Q9H2P0	955	Q9H2P0	Activity-dependent neuroprotector homeobox protein	ADNP	0	NaN	HLTEEPTKLMHNASDSEVDQDDVVEWKDGAS	2	NaN	-0.0139459	NaN	-0.0741828	NaN	NaN	S	3	1	4.25e-10	243.49	106.877	0	NaN
Q9H2P0	709	Q9H2P0	Activity-dependent neuroprotector homeobox protein	ADNP	0.716345	0.413699	QNGQDKTNAPSRLNQSPSLAPVKRTYEQMEF	1	0.270947	-0.0139459	0.468323	-0.0741828	0.284893	0.542505	S	2	0.999894	0.00173108	203.74	39.7516	0.779644	0.369635
Q9H2P0;E9PQK8	98;98	Q9H2P0	Activity-dependent neuroprotector homeobox protein	ADNP	0.101299	0.0869744	SKFFSAYKSHFRNVHSEDFENRILLNCPYCT	1	-0.183572	-0.0139459	0.269392	-0.0741828	-0.169626	0.343575	S	2	1	0.00242058	176.32	143.578	0.0551241	0.04291
Q9H2P0	953	Q9H2P0	Activity-dependent neuroprotector homeobox protein	ADNP	0.014632	-0.0145124	TIHLTEEPTKLMHNASDSEVDQDDVVEWKDG	1;2	-0.307073	-0.0139459	0.189919	-0.0741828	-0.293127	0.264102	S	3	1	4.25e-10	243.49	106.877	0.0692429	-0.0585768
Q9H2P0	1001	Q9H2P0	Activity-dependent neuroprotector homeobox protein	ADNP	1.0993	-1.09263	DNTCEMKPGTWSDESSQSEDARSSKPAAKKK	1	-0.969311	-0.0139459	-1.30408	-0.0741828	-0.955365	-1.22989	S	2	0.787461	0.0016793	93.812	6.591	1.03116	-1.13669
Q6IQ32	1024	Q6IQ32	ADNP homeobox protein 2	ADNP2	0	NaN	EKVTSVVPFKRQRNESRTEGPIVKDEALQIL	1	-2.51153	NaN	NaN	NaN	NaN	NaN	S	2	0.990844	0.0332408	83.633	20.3428	0	-2.51153
P13945	140	P13945	Beta-3 adrenergic receptor	ADRB3	0	NaN	IETLCALAVDRYLAVTNPLRYGALVTKRCAR	3	NaN	NaN	NaN	NaN	NaN	NaN	T	2	0.99998	0.01441	51.798	46.9208	0	NaN
P13945	136	P13945	Beta-3 adrenergic receptor	ADRB3	0	NaN	VTASIETLCALAVDRYLAVTNPLRYGALVTK	3	NaN	NaN	NaN	NaN	NaN	NaN	Y	2	0.999984	0.01441	51.798	47.8984	0	NaN
P13945	145	P13945	Beta-3 adrenergic receptor	ADRB3	0	NaN	ALAVDRYLAVTNPLRYGALVTKRCARTAVVL	3	NaN	NaN	NaN	NaN	NaN	NaN	Y	2	0.999984	0.01441	51.798	47.8984	0	NaN
P25098	670	P25098	Beta-adrenergic receptor kinase 1	ADRBK1	0	0.460015	QQLVQRVPKMKNKPRSPVVELSKVPLVQRGS	1	NaN	0.0382958	0.476226	0.016211	NaN	0.460015	S	2	1	0.00272723	77.744	66.6438	0	0.476226
Q16186	217	Q16186	Proteasomal ubiquitin receptor ADRM1	ADRM1	0.789524	1.21395	GSSSSSSSRSQSAAVTPSSTTSSTRATPAPS	1	0.903655	0.00619029	1.44493	-0.085512	0.897465	1.53044	T	2	0.985304	0.000567299	140.73	19.7761	0.841025	1.17429
Q16186	405	Q16186	Proteasomal ubiquitin receptor ADRM1	ADRM1	0	0.15473	KEGDTKDKKDEEEDMSLD_____________	1	0.16092	0.00619029	NaN	-0.085512	0.15473	NaN	S	2	1	0.00994801	138.73	138.726	0	0.16092
Q16186	211	Q16186	Proteasomal ubiquitin receptor ADRM1	ADRM1	0	-0.510536	GSSGPPGSSSSSSSRSQSAAVTPSSTTSSTR	1	-0.504346	0.00619029	NaN	-0.085512	-0.510536	NaN	S	2	0.89158	0.0308212	52.318	9.15406	0	-0.504346
P30566;E7ERF4;P30566-2	12;12;12	P30566	Adenylosuccinate lyase	ADSL	0	1.2248	____MAAGGDHGSPDSYRSPLASRYASPEMC		1.10279	-0.122005	NaN	-0.134889	1.2248	NaN	S	3	0.670693	0.000161991	90.1	3.15393	0	1.10279
P30566;E7ERF4;P30566-2	15;15;15	P30566	Adenylosuccinate lyase	ADSL	0	1.02483	_MAAGGDHGSPDSYRSPLASRYASPEMCFVF	1	NaN	-0.122005	0.889941	-0.134889	NaN	1.02483	S	3	0.815376	0.000105427	111.97	6.46853	0	0.889941
P30566;E7ERF4;P30566-2	9;9;9	P30566	Adenylosuccinate lyase	ADSL	0.865775	0.127755	_______MAAGGDHGSPDSYRSPLASRYASP	1	-0.0220094	-0.122005	0.0206267	-0.134889	0.0999951	0.155516	S	2	0.999946	5.68e-05	206.53	42.6641	0.00905748	-0.000691388
P30566;E7ERF4	434;448	P30566	Adenylosuccinate lyase	ADSL	0	0.127045	GDNDLIERIQVDAYFSPIHSQLDHLLDPSSF	1	0.0050406	-0.122005	NaN	-0.134889	0.127045	NaN	S	3	0.986307	1.73e-05	114.76	18.5998	0	0.0050406
Q6ZN18-2;Q6ZN18	24;24	Q6ZN18-2	Zinc finger protein AEBP2	AEBP2	0	NaN	ADLEELSRLSPLPPGSPGSAARGRAEPPEEE	1	NaN	NaN	-0.502587	NaN	NaN	NaN	S	2	0.801951	0.0277002	58.246	6.0738	0	-0.502587
Q6ZN18-2;Q6ZN18	206;206	Q6ZN18-2	Zinc finger protein AEBP2	AEBP2	0	NaN	TGGGGSSATSGGRRGSLEMSSDGEPLSRMDS	1	0.427499	NaN	0.43957	NaN	NaN	NaN	S	2	1	0.000260008	184.34	64.2727	2.05246	0.433534
Q8N556;Q8N556-2	548;632	Q8N556	Actin filament-associated protein 1	AFAP1	0	NaN	QPKKADPAAVVKRTGSNAAQYKYGKNRVEAD	1	0.744247	NaN	NaN	NaN	NaN	NaN	S	2	0.716956	0.0094256	74.296	4.03653	0	0.744247
Q8N556;Q8N556-2	668;752	Q8N556	Actin filament-associated protein 1	AFAP1	0	NaN	LGLAIEPKSGTSSPQSPVFRHRTLENSPISS	1	0.188274	NaN	0.0877344	NaN	NaN	NaN	S	2	0.999996	0.000134675	153.41	56.1044	0.652891	0.138004
Q8N556;Q8N556-2	710;794	Q8N556	Actin filament-associated protein 1	AFAP1	0	NaN	VNSAAVLKKSQAAPGSSPCRGHVLRKAKEWE	1	NaN	NaN	0.425781	NaN	NaN	NaN	S	2	0.499994	0.0287719	54.09	0	0	0.425782
Q8N556;Q8N556-2	711;795	Q8N556	Actin filament-associated protein 1	AFAP1	0	NaN	NSAAVLKKSQAAPGSSPCRGHVLRKAKEWEL	1	0.143785	NaN	0.425781	NaN	NaN	NaN	S	2	0.861142	0.00559863	94.355	7.92504	0.533621	0.284783
P51825;P51825-3;P51825-2;E7EMC5;E7ETI4	212;212;219;219;219	P51825	AF4/FMR2 family member 1	AFF1	0	NaN	ELSPLISLPSPVPPLSPIHSNQQTLPRTQGS	1	NaN	NaN	-2.39912	NaN	NaN	NaN	S	3	0.961048	0.000370352	66.677	18.5492	0	-2.39912
P51825;P51825-3;P51825-2;F5GXF9	588;588;595;226	P51825	AF4/FMR2 family member 1	AFF1	0	NaN	APPEAPHPGKRSCQKSPAQQEPPQRQTVGTK	1	-0.865306	NaN	-0.982192	NaN	NaN	NaN	S	2	1	0.00133269	147.96	101.388	1.39552	-0.923749
Q9UHB7;Q9UHB7-2	706;706	Q9UHB7	AF4/FMR2 family member 4	AFF4	0	NaN	RMFSPMEEKELLSPLSEPDDRYPLIVKIDLN	2	NaN	NaN	NaN	-0.161912	NaN	NaN	S	2	1	0.000170485	88.504	67.7699	0	NaN
Q9UHB7;Q9UHB7-2	839;839	Q9UHB7	AF4/FMR2 family member 4	AFF4	0	NaN	PKTEHGSRKRTISQSSSLKSSSNSNKETSGS	2	NaN	NaN	NaN	-0.161912	NaN	NaN	S	2	0.844244	0.00194596	70.523	9.96768	0	NaN
Q9UHB7;Q9UHB7-2;Q9UHB7-3	180;180;180	Q9UHB7	AF4/FMR2 family member 4	AFF4	0	NaN	KKGQHGSEHSKSRSSSPGKPQAVSSLNSSHS	1	-0.111352	NaN	NaN	-0.161912	NaN	NaN	S	3	0.996007	1.21e-05	154.92	25.3517	0	-0.111352
Q9UHB7;Q9UHB7-2;H7C319	424;424;120	Q9UHB7	AF4/FMR2 family member 4	AFF4	0	NaN	SNSEPSHHNSEGADNSRDDSSSHSGSESSSG	1	-0.376208	NaN	NaN	-0.161912	NaN	NaN	S	3	0.600584	8.91e-05	85.814	1.9343	0	-0.376208
Q9UHB7;Q9UHB7-2	671;671	Q9UHB7	AF4/FMR2 family member 4	AFF4	0	NaN	SESLPPSSQTPKYPESNRTPVKPSSVEEEDS	1	-0.314589	NaN	NaN	-0.161912	NaN	NaN	S	4	0.499982	2.63e-08	173.86	0	0	-0.314589
Q9UHB7;Q9UHB7-2;Q9UHB7-3	332;332;332	Q9UHB7	AF4/FMR2 family member 4	AFF4	0	NaN	DEILKEMTHSWPPPLTAIHTPCKTEPSKFPF	2	NaN	NaN	NaN	-0.161912	NaN	NaN	T	3	0.999998	0.000623007	71.06	59.7006	0	NaN
Q9UHB7;Q9UHB7-2;Q9UHB7-3	336;336;336	Q9UHB7	AF4/FMR2 family member 4	AFF4	0	NaN	KEMTHSWPPPLTAIHTPCKTEPSKFPFPTKE	2	NaN	NaN	NaN	-0.161912	NaN	NaN	T	3	1	0.000623007	71.06	67.3307	0	NaN
Q9UHB7;Q9UHB7-2	674;674	Q9UHB7	AF4/FMR2 family member 4	AFF4	0	NaN	LPPSSQTPKYPESNRTPVKPSSVEEEDSFFR	1	-0.314589	NaN	NaN	-0.161912	NaN	NaN	T	4	0.499982	2.63e-08	173.86	0	0	-0.314589
Q9UHB7	1043	Q9UHB7	AF4/FMR2 family member 4	AFF4	0	0.394081	LTEHLKNSYNNSQAPSPGLGSKAVGMPSPVS	1	0.320773	NaN	0.23217	-0.161912	NaN	0.394081	S	2	0.999961	6.65e-07	238.06	44.0671	0.995024	0.276471
Q9UHB7	1058	Q9UHB7	AF4/FMR2 family member 4	AFF4	0	0.386322	SPGLGSKAVGMPSPVSPKLSPGNSGNYSSGA	1;2	-0.160347	NaN	0.224411	-0.161912	NaN	0.386322	S	2	1	0.00413276	102.5	71.0799	0.0481949	0.0320321
Q9UHB7;Q9UHB7-2	836;836	Q9UHB7	AF4/FMR2 family member 4	AFF4	0	0.259927	SKDPKTEHGSRKRTISQSSSLKSSSNSNKET	1;2	0.265677	NaN	0.0980152	-0.161912	NaN	0.259927	S	2	0.99982	0.00194596	131.03	40.9366	0.560673	0.181846
Q9UHB7;Q9UHB7-2	694;694	Q9UHB7	AF4/FMR2 family member 4	AFF4	0	0.0963903	SSVEEEDSFFRQRMFSPMEEKELLSPLSEPD	1	-0.0562061	NaN	-0.0655212	-0.161912	NaN	0.0963903	S	2	1	0.00561075	128.81	117.52	1.31317	-0.0608637
Q9UHB7;Q9UHB7-2	814;814	Q9UHB7	AF4/FMR2 family member 4	AFF4	0	0.0714312	ESSKQSAAKEKDLLPSPAGPVPSKDPKTEHG	1	-0.21225	NaN	-0.0904803	-0.161912	NaN	0.0714312	S	2	0.999943	0.00192532	87.429	42.4303	0.613563	-0.151365
Q9UHB7;Q9UHB7-2;H7C319	418;418;114	Q9UHB7	AF4/FMR2 family member 4	AFF4	0	-0.0382054	PRSTPGSNSEPSHHNSEGADNSRDDSSSHSG	1	NaN	NaN	-0.200117	-0.161912	NaN	-0.0382054	S	3	0.642041	0.000796559	59.359	5.36087	0	-0.200117
Q9UHB7;Q9UHB7-2	703;703	Q9UHB7	AF4/FMR2 family member 4	AFF4	0	-0.134616	FRQRMFSPMEEKELLSPLSEPDDRYPLIVKI	1;2	-0.349107	NaN	-0.296527	-0.161912	NaN	-0.134616	S	2	1	0.000170485	88.504	85.6963	1.28625	-0.322817
Q9UHB7;Q9UHB7-2	487;487	Q9UHB7	AF4/FMR2 family member 4	AFF4	0	-0.209735	WQLDNWLNKVNPHKVSPASSVDSNIPSSQGY	1	-0.237166	NaN	-0.371646	-0.161912	NaN	-0.209735	S	3	0.997935	4.02e-09	187.75	27.0985	0.858865	-0.304406
Q9UHB7;Q9UHB7-2;Q9UHB7-3	222;222;222	Q9UHB7	AF4/FMR2 family member 4	AFF4	0	-0.237134	HQRSKSPRDPDANWDSPSRVPFSSGQHSTQS	1	-0.573703	NaN	-0.399045	-0.161912	NaN	-0.237134	S	2	0.994744	0.00045951	210.96	22.7702	0.946535	-0.486374
Q9UHB7	1062	Q9UHB7	AF4/FMR2 family member 4	AFF4	0	-0.458623	GSKAVGMPSPVSPKLSPGNSGNYSSGASSAS	1	-0.272315	NaN	-0.620534	-0.161912	NaN	-0.458623	S	3	0.992253	3.44e-06	133.42	21.0846	0.625735	-0.446424
Q9UHB7;Q9UHB7-2	549;549	Q9UHB7	AF4/FMR2 family member 4	AFF4	0	-0.560699	KTIQKGSESGRGRQKSPAQSDSTTQRRTVGK	1	-0.663557	NaN	-0.72261	-0.161912	NaN	-0.560699	S	2	1	0.00193346	176.08	97.9448	1.56695	-0.693083
Q9UHB7	1055	Q9UHB7	AF4/FMR2 family member 4	AFF4	0	-0.621478	QAPSPGLGSKAVGMPSPVSPKLSPGNSGNYS	1;2	-1.00341	NaN	-0.78339	-0.161912	NaN	-0.621479	S	2	1	0.00449818	89.232	71.0799	1.10792	-0.893399
Q6ULP2-5;Q6ULP2-2;Q6ULP2-4;Q6ULP2;Q6ULP2-3;B8ZZI9	518;518;518;518;518;149	Q6ULP2-5	Aftiphilin	AFTPH	0	NaN	TSDNLSEECQLARKSSGTGTEPVAKLKNGQE	1	0.576184	NaN	0.989284	NaN	NaN	NaN	S	2	0.994401	0.00101309	165.44	24.7652	0.784497	0.782734
Q6ULP2-5;Q6ULP2-2;Q6ULP2-4;Q6ULP2;Q6ULP2-3	226;226;226;226;226	Q6ULP2-5	Aftiphilin	AFTPH	0	NaN	PLSTHSTEYNLDSVPSPAEEFADFATFSKKE	1	0.169797	NaN	-0.335335	NaN	NaN	NaN	S	3	0.998951	5.67e-08	99.536	29.8071	0.0977834	-0.0827692
Q6ULP2-5;Q6ULP2-2;Q6ULP2-4;Q6ULP2;Q6ULP2-3;B8ZZI9	617;617;617;617;617;248	Q6ULP2-5	Aftiphilin	AFTPH	0	NaN	AWQSHRTDENIDTPGTPKTHSVPSATSKGAV	1	0.832444	NaN	0.162081	NaN	NaN	NaN	T	2	0.990431	0.00177479	147.51	20.1497	0.422993	0.497263
E7EUN2;Q9UPQ3-2;Q9UPQ3;F5GXM9;H7C211	687;422;422;261;56	E7EUN2	Arf-GAP with GTPase, ANK repeat and PH domain-containing protein 1	AGAP1	0	NaN	GKRPPRATSACAPISSPKTNGLSKDMSSLHI	1	0.445091	NaN	NaN	NaN	NaN	NaN	S	2	0.761605	0.000892245	105.17	5.04432	0	0.445091
E7EUN2;Q9UPQ3-2;Q9UPQ3;F5GXM9;H7C211;H7C0A7	733;468;521;360;155;49	E7EUN2	Arf-GAP with GTPase, ANK repeat and PH domain-containing protein 1	AGAP1	0	NaN	PSISSTTSPKLDPPPSPHANRKKHRRKKSTS	1	-0.414134	NaN	-0.492119	NaN	NaN	NaN	S	3	1	0.00166806	70.272	42.9467	1.26242	-0.453126
E7EUN2;Q9UPQ3-2;Q9UPQ3;F5GXM9;H7C3T5	1048;783;836;675;238	E7EUN2	Arf-GAP with GTPase, ANK repeat and PH domain-containing protein 1	AGAP1	0	NaN	LLQYGCPDERFVLMATPNLSRRNNNRNNSSG	1	NaN	NaN	-0.166454	NaN	NaN	NaN	T	2	0.806887	0.0330051	48.527	6.21001	0	-0.166454
E7ESL9	24	E7ESL9		AGAP3	0	NaN	DSCPGERPAACRRAHSVCDSLDLHGASAGRA	1	0.675184	NaN	1.03647	NaN	NaN	NaN	S	3	0.999986	0.000138677	116.39	48.4609	0.878014	0.855826
E7ESL9;Q96P47;Q96P47-2;Q96P47-4;B3KNZ8;Q96P47-3;E9PAL8;H7C5G0;H7C4U6	542;326;327;362;134;326;362;135;127	E7ESL9;Q96P47	Arf-GAP with GTPase, ANK repeat and PH domain-containing protein 3	AGAP3	0	NaN	QRELRIETIAASSTPTPIRKQSKRRSNIFTI;QRELRIETIAASSTPTPIRKQSKRRSNIFTS		NaN	-0.0792341	NaN	-0.204566	NaN	NaN	T	2	0.467478	8.67e-07	204.07	0	0	NaN
Q96P47;Q96P47-2;Q96P47-4;H0Y873	538;539;574;67	Q96P47	Arf-GAP with GTPase, ANK repeat and PH domain-containing protein 3	AGAP3	0.0115484	-0.0067364	PAEVLSSSPKLDPPPSPHSNRKKHRRKKSTG	1	-0.249308	-0.0792341	-0.0479647	-0.204566	-0.170074	0.156601	S	3	0.995607	0.00117603	88.706	23.553	0.421363	-0.148636
E7ESL9;Q96P47;Q96P47-2;Q96P47-4;B3KNZ8;Q96P47-3;E9PAL8;H7C5G0;H7C4U6	540;324;325;360;132;324;360;133;125	E7ESL9;Q96P47	Arf-GAP with GTPase, ANK repeat and PH domain-containing protein 3	AGAP3	0.0904604	-0.196764	ISQRELRIETIAASSTPTPIRKQSKRRSNIF	1	-0.922702	-0.0792341	0.245374	-0.204566	-0.843468	0.449939	T	3	0.737505	8.67e-07	204.07	4.8317	0.176874	-0.338664
P52594-2;P52594-3;P52594;P52594-4	325;365;365;374	P52594-2	Arf-GAP domain and FG repeat-containing protein 1	AGFG1	0	NaN	GTTGKAPVGSVVSVPSQSSASSDKYAALAEL		NaN	0.187641	NaN	0.211137	NaN	NaN	S	2	0.225777	0.00190989	77.959	0	0	NaN
P52594-2;P52594-3;P52594;P52594-4	330;370;370;379	P52594-2	Arf-GAP domain and FG repeat-containing protein 1	AGFG1	0	NaN	APVGSVVSVPSQSSASSDKYAALAELDSVFS		NaN	0.187641	NaN	0.211137	NaN	NaN	S	2	0.225777	0.00190989	77.959	0	0	NaN
P52594-2;P52594-3;P52594;P52594-4	331;371;371;380	P52594-2	Arf-GAP domain and FG repeat-containing protein 1	AGFG1	0	NaN	PVGSVVSVPSQSSASSDKYAALAELDSVFSS		NaN	0.187641	NaN	0.211137	NaN	NaN	S	2	0.225777	0.00190989	77.959	0	0	NaN
P52594-2;P52594-3;P52594;P52594-4;B8ZZY2;C9J2I0	251;291;291;300;291;213	P52594-2	Arf-GAP domain and FG repeat-containing protein 1	AGFG1	0	NaN	ASVNANFAHFDNFPKSSSADFGTFNTSQSHQ		NaN	0.187641	NaN	0.211137	NaN	NaN	S	3	0.344851	0.000598905	55.406	0	0	NaN
P52594-2;P52594-3;P52594;P52594-4;B8ZZY2;C9J2I0	252;292;292;301;292;214	P52594-2	Arf-GAP domain and FG repeat-containing protein 1	AGFG1	0	NaN	SVNANFAHFDNFPKSSSADFGTFNTSQSHQT		NaN	0.187641	NaN	0.211137	NaN	NaN	S	3	0.344851	0.000598905	55.406	0	0	NaN
P52594-2;P52594-3;P52594;P52594-4;B8ZZY2;C9J2I0	177;177;177;162;177;99	P52594-2	Arf-GAP domain and FG repeat-containing protein 1	AGFG1	0	NaN	SLLGDSAPTLHLNKGTPSQSPVVGRSQGQQQ	2	NaN	0.187641	NaN	0.211137	NaN	NaN	T	2	0.999995	0.000918278	211.17	52.8173	0	NaN
P52594-2;P52594-3;P52594;P52594-4;B8ZZY2;C9J2I0	253;293;293;302;293;215	P52594-2	Arf-GAP domain and FG repeat-containing protein 1	AGFG1	2.09011	0.857853	VNANFAHFDNFPKSSSADFGTFNTSQSHQTA	1	1.05645	0.187641	1.05804	0.211137	0.868804	0.846902	S	3	0.961906	4.89e-09	186.13	14.8424	3.31869	1.05724
P52594-2;P52594-3;P52594;P52594-4	322;362;362;371	P52594-2	Arf-GAP domain and FG repeat-containing protein 1	AGFG1	1.23446	0.434743	SGFGTTGKAPVGSVVSVPSQSSASSDKYAAL	1	0.662297	0.187641	0.605968	0.211137	0.474656	0.394831	S	2	0.999998	3.02e-05	217.94	57.9606	1.54889	0.634132
P52594-2;P52594-3;P52594;P52594-4;B8ZZY2;C9J2I0	181;181;181;166;181;103	P52594-2	Arf-GAP domain and FG repeat-containing protein 1	AGFG1	1.46119	-0.502741	DSAPTLHLNKGTPSQSPVVGRSQGQQQEKKQ	1;2	-0.342433	0.187641	-0.26427	0.211137	-0.530074	-0.475407	S	2	1	0.000918278	211.17	79.1193	1.08848	-0.303351
Q8N302	344	Q8N302	Angiogenic factor with G patch and FHA domains 1	AGGF1	0	NaN	SPPKVTVPTSGNTIESPLHENISNSTSFKDE	1	-0.614403	NaN	0.0184917	NaN	NaN	NaN	S	3	0.999884	1.34e-09	178.94	40.8616	0.284703	-0.297956
Q53H12;E9PC15;E9PG39	158;130;155	Q53H12	Acylglycerol kinase, mitochondrial	AGK	0	NaN	TFSKIPIGFIPLGETSSLSHTLFAESGNKVQ		NaN	-0.0459675	NaN	-0.0190096	NaN	NaN	S	3	0.430198	1.81e-05	92.924	0	0	NaN
Q53H12;E9PC15;E9PG39	159;131;156	Q53H12	Acylglycerol kinase, mitochondrial	AGK	0	NaN	FSKIPIGFIPLGETSSLSHTLFAESGNKVQH		NaN	-0.0459675	NaN	-0.0190096	NaN	NaN	S	3	0.430198	1.81e-05	92.924	0	0	NaN
Q9UKV8;Q9UKV8-2	387;387	Q9UKV8	Protein argonaute-2	AGO2	1.94816	1.3501	APDRQEEISKLMRSASFNTDPYVREFGIMVK	1	1.21139	-0.114816	1.49687	0.122871	1.3262	1.374	S	2	0.999899	0.00326503	149.57	39.9693	1.17483	1.35413
Q53EU6	68	Q53EU6	Glycerol-3-phosphate acyltransferase 3	AGPAT9	0	NaN	IEKGTPKESILKNSASVGIIQRDESPMEKGL	1	1.21008	NaN	1.21033	NaN	NaN	NaN	S	2	0.999945	0.00073448	167.05	42.5939	4.18293	1.2102
O00116;B8ZZ81	74;74	O00116	Alkyldihydroxyacetonephosphate synthase, peroxisomal	AGPS	0	NaN	KARRAASAATAAPTATPAAQESGTIPKKRQE	1	NaN	-0.0961134	NaN	-0.0843185	NaN	NaN	T	2	0.648486	0.0156236	55.662	5.15746	0	NaN
O00116;B8ZZ81	65;65	O00116	Alkyldihydroxyacetonephosphate synthase, peroxisomal	AGPS	1.3014	-0.481673	REALSTNECKARRAASAATAAPTATPAAQES	1	-0.615663	-0.0961134	-0.528115	-0.0843185	-0.519549	-0.443797	S	2	0.999977	3.5e-21	272.46	46.4082	1.31306	-0.571889
Q9UPW5-2;Q9UPW5;Q9UPW5-3	1128;1168;1180	Q9UPW5-2	Cytosolic carboxypeptidase 1	AGTPBP1	0.630667	0.249023	LDFENDLIESSCKVTSPTTYVLDEDEPRFLE	1	0.107554	-0.0455506	0.273218	-0.0717244	0.153105	0.344942	S	2	0.986712	0.00165803	94.71	20.7819	0.582942	0.190386
Q6RW13	126	Q6RW13	Type-1 angiotensin II receptor-associated protein	AGTRAP	0	NaN	RERGGELLVHTGFLGSSQDRSAYQTIDSAEA		NaN	-0.645051	NaN	-0.582858	NaN	NaN	S	2	0.499099	0.00434717	63.302	0	0	NaN
Q6RW13	127	Q6RW13	Type-1 angiotensin II receptor-associated protein	AGTRAP	0	NaN	ERGGELLVHTGFLGSSQDRSAYQTIDSAEAP		NaN	-0.645051	NaN	-0.582858	NaN	NaN	S	2	0.499099	0.00434717	63.302	0	0	NaN
Q8WYP5;Q8WYP5-3;Q8WYP5-2	2222;2231;2257	Q8WYP5	Protein ELYS	AHCTF1	0	NaN	KESAWSPPPIEIRLISPLASPADGVKSKPRK	2	NaN	-0.109779	NaN	-0.214307	NaN	NaN	S	2	1	0.00227006	82.877	74.1408	0	NaN
Q8WYP5;Q8WYP5-3;Q8WYP5-2	2226;2235;2261	Q8WYP5	Protein ELYS	AHCTF1	0	NaN	WSPPPIEIRLISPLASPADGVKSKPRKTTEV	2	NaN	-0.109779	NaN	-0.214307	NaN	NaN	S	2	1	0.00227006	82.877	74.1408	0	NaN
Q8WYP5;Q8WYP5-3;Q8WYP5-2	1218;1227;1253	Q8WYP5	Protein ELYS	AHCTF1	0	NaN	LRSTLRSTPLASPSPSPGRSPQRLKETRISF	2	NaN	-0.109779	NaN	-0.214307	NaN	NaN	S	3	0.9789	0.000556145	70.316	16.8201	0	NaN
Q8WYP5;Q8WYP5-3;Q8WYP5-2;H7C4S1	2063;2072;2098;11	Q8WYP5	Protein ELYS	AHCTF1	0	3.61211	LTKKTESQSQKRSLHSVSEERTDEMTHKETN	1	3.50233	-0.109779	NaN	-0.214307	3.61211	NaN	S	2	0.998642	0.00515879	85.554	29.2262	0	3.50233
Q8WYP5;Q8WYP5-3;Q8WYP5-2	528;537;563	Q8WYP5	Protein ELYS	AHCTF1	0	1.99466	LIPDGYNRCLVAGLLSPRFVDVQPSSLSQEE	1	NaN	-0.109779	1.78035	-0.214307	NaN	1.99466	S	2	1	0.00667154	85.554	85.5541	0	1.78035
Q8WYP5;Q8WYP5-3;Q8WYP5-2	1229;1238;1264	Q8WYP5	Protein ELYS	AHCTF1	0	1.59143	SPSPSPGRSPQRLKETRISFVEEDVHPKWIP	1	NaN	-0.109779	1.37712	-0.214307	NaN	1.59143	T	3	0.71527	0.00121429	71.685	4.00036	0	1.37712
Q8WYP5;Q8WYP5-3;Q8WYP5-2	1369;1378;1404	Q8WYP5	Protein ELYS	AHCTF1	0	1.3366	QTEKDGDKDVFASEVTPSDLQKQMGNLEDAE	1	1.22682	-0.109779	NaN	-0.214307	1.3366	NaN	T	2	0.996386	0.000142402	210.39	24.4048	0	1.22682
Q8WYP5;Q8WYP5-3;Q8WYP5-2	1232;1241;1267	Q8WYP5	Protein ELYS	AHCTF1	1.00798	1.32138	PSPGRSPQRLKETRISFVEEDVHPKWIPGAA	1	1.00619	-0.109779	1.31249	-0.214307	1.11597	1.5268	S	2	1	0.000105056	183.71	76.0097	1.07772	1.15934
Q8WYP5;Q8WYP5-3;Q8WYP5-2	1142;1151;1177	Q8WYP5	Protein ELYS	AHCTF1	3.45352	0.996919	RPSQCSEFIQQSSMKSPLYLVSRSLPSSSQL	1	0.886589	-0.109779	0.783163	-0.214307	0.996368	0.997471	S	2	0.999999	9.41e-05	178.94	59.0204	1.4047	0.834876
Q8WYP5;Q8WYP5-3;Q8WYP5-2	1214;1223;1249	Q8WYP5	Protein ELYS	AHCTF1	0	0.681407	PQSILRSTLRSTPLASPSPSPGRSPQRLKET	1	0.571628	-0.109779	NaN	-0.214307	0.681407	NaN	S	2	0.967147	0.00051521	105.28	15.9189	0	0.571628
Q8WYP5;Q8WYP5-3;Q8WYP5-2	1283;1292;1318	Q8WYP5	Protein ELYS	AHCTF1	0.56559	0.662941	EWLKSKDRTTSFFLNSPEKEHQEMDEGSQSL	1	0.251446	-0.109779	0.750349	-0.214307	0.361225	0.964656	S	2	1	0.000284816	266.77	160.219	0.531428	0.500898
Q8WYP5;Q8WYP5-3;Q8WYP5-2	1541;1550;1576	Q8WYP5	Protein ELYS	AHCTF1	1.37528	0.539628	EKLEAQDSGEEARNLSFNELYPSGTLKLQYN	1	0.394075	-0.109779	0.361095	-0.214307	0.503854	0.575402	S	2	1	0.000241583	190.46	146.514	1.55618	0.377585
Q8WYP5;Q8WYP5-3;Q8WYP5-2	1297;1306;1332	Q8WYP5	Protein ELYS	AHCTF1	1.11568	0.526682	NSPEKEHQEMDEGSQSLEKLDVSKGNSSVSI	1;2	0.35321	-0.109779	0.376068	-0.214307	0.462989	0.590375	S	2	1	1.64e-45	398.18	148.639	1.70012	0.364639
Q8WYP5;Q8WYP5-3;Q8WYP5-2	1808;1817;1843	Q8WYP5	Protein ELYS	AHCTF1	0	0.481304	VRGLSQNQQIPQNSVTPRRGRRKKEVNQDIL	1	NaN	-0.109779	0.266996	-0.214307	NaN	0.481304	T	2	0.773307	0.00538536	62.739	5.32919	0	0.266996
Q8WYP5;Q8WYP5-3;Q8WYP5-2	1160;1169;1195	Q8WYP5	Protein ELYS	AHCTF1	0.520106	0.401942	YLVSRSLPSSSQLKGSPQAISRASELHLLET	1	0.0858326	-0.109779	0.393965	-0.214307	0.195612	0.608272	S	2	1	0.00709426	110.84	75.8845	0.439574	0.239899
Q8WYP5;Q8WYP5-3;Q8WYP5-2	1944;1953;1979	Q8WYP5	Protein ELYS	AHCTF1	1.21995	0.343447	QLRIKHVRRVRGREVSPSDVREDSNLESSQL	1	0.266277	-0.109779	0.0965318	-0.214307	0.376056	0.310839	S	2	0.999813	0.00897692	102.55	37.2711	0.555033	0.181404
Q8WYP5;Q8WYP5-3;Q8WYP5-2	1533;1542;1568	Q8WYP5	Protein ELYS	AHCTF1	0.917952	0.323188	QEIHVIEQEKLEAQDSGEEARNLSFNELYPS	1	0.151339	-0.109779	0.170951	-0.214307	0.261118	0.385258	S	2	1	0.00303872	153.14	111.116	1.4124	0.161145
Q8WYP5;Q8WYP5-3;Q8WYP5-2	1295;1304;1330	Q8WYP5	Protein ELYS	AHCTF1	0	0.276152	FLNSPEKEHQEMDEGSQSLEKLDVSKGNSSV	1;2	NaN	-0.109779	0.0618453	-0.214307	NaN	0.276153	S	2	1	0.000108547	209.45	148.639	0	0.0618453
Q8WYP5;Q8WYP5-3;Q8WYP5-2	1898;1907;1933	Q8WYP5	Protein ELYS	AHCTF1	0	-0.127998	ESVEIINDLKVSTVTSPSRMIRKLRSTNLDA	1	NaN	-0.109779	-0.342305	-0.214307	NaN	-0.127998	S	2	0.669467	0.00148233	127.56	3.43495	0	-0.342305
Q8WYP5;Q8WYP5-3;Q8WYP5-2	1513;1522;1548	Q8WYP5	Protein ELYS	AHCTF1	1.10323	-0.290804	KESVDLPEEKLPISDSPPDTQEIHVIEQEKL	1	-0.436783	-0.109779	-0.468911	-0.214307	-0.327004	-0.254603	S	2	0.999983	4.64e-29	331.42	50.6168	1.64641	-0.452847
Q8WYP5;Q8WYP5-3;Q8WYP5-2	1222;1231;1257	Q8WYP5	Protein ELYS	AHCTF1	1.28859	-0.863584	LRSTPLASPSPSPGRSPQRLKETRISFVEED	1;2	-0.903414	-0.109779	-1.14784	-0.214307	-0.793635	-0.933534	S	2	0.999993	4.76e-16	273.74	53.2872	1.12203	-1.02563
Q8WYP5;Q8WYP5-3;Q8WYP5-2	2212;2221;2247	Q8WYP5	Protein ELYS	AHCTF1	0.205725	-1.08729	KTKQASKNTEKESAWSPPPIEIRLISPLASP	1	0.417488	-0.109779	-2.91615	-0.214307	0.527267	-2.70185	S	2	0.999897	0.0024486	89.992	39.8905	0.228761	-1.24933
Q96HN2-2;Q96HN2	107;107	Q96HN2-2	Putative adenosylhomocysteinase 3	AHCYL2	0	NaN	HHQHQRHRDGGEALVSPDGTVTEAPRTVKKI	1	-0.464385	NaN	NaN	NaN	NaN	NaN	S	2	0.998217	0.000505594	103.25	27.9536	0	-0.464385
Q5TGY3	1064	Q5TGY3	AT-hook DNA-binding motif-containing protein 1	AHDC1	0	NaN	SAPTPLRCDSRASTVSPGGYMVPKGTTASAT	1	0.28558	NaN	0.598937	NaN	NaN	NaN	S	2	0.950703	0.00150563	105.19	13.346	0.664037	0.442258
Q5TGY3	1549	Q5TGY3	AT-hook DNA-binding motif-containing protein 1	AHDC1	0	NaN	AAAGYGCPLLSDLTLSPVPRDSLLPLQDTAY	1	0.631803	NaN	0.547351	NaN	NaN	NaN	S	3	0.980214	1.8e-05	134.66	16.9598	1.34182	0.589577
Q5TGY3	596	Q5TGY3	AT-hook DNA-binding motif-containing protein 1	AHDC1	0	NaN	MPEVKKRRRRKQKLASPQPSYAADANDSKAE	1	-2.99896	NaN	1.53287	NaN	NaN	NaN	S	2	0.999996	0.000896905	93.255	54.3061	0.0964697	-0.733048
Q5TGY3	46	Q5TGY3	AT-hook DNA-binding motif-containing protein 1	AHDC1	0	NaN	GPPTPRPLLPTRPPASPPDKAFSTHAFSENP	1	0.456596	NaN	-0.113848	NaN	NaN	NaN	S	3	0.974806	0.000471283	89.374	15.8762	0.183386	0.171374
G8JLN6;H0YEF1;H0Y343;Q8N157	477;521;623;1123	G8JLN6	Jouberin	AHI1	0	NaN	SETLYQELPPEIKERSPPLSPEEKTKIEKSP	2	NaN	NaN	NaN	NaN	NaN	NaN	S	2	1	0.0166287	179.79	64.5199	0	NaN
G8JLN6;H0YEF1;H0Y343;Q8N157	481;525;627;1127	G8JLN6	Jouberin	AHI1	0	NaN	YQELPPEIKERSPPLSPEEKTKIEKSPAPQK	2	NaN	NaN	NaN	NaN	NaN	NaN	S	2	1	0.0166287	179.79	64.5199	0	NaN
Q09666	4993	Q09666	Neuroblast differentiation-associated protein AHNAK	AHNAK	0	NaN	PKFGFGAKSPKADIKSPSLDVTVPEAELNLE		NaN	0.281431	NaN	0.218843	NaN	NaN	S	3	0.481379	1.94e-05	79.949	0	0	NaN
Q09666	4995	Q09666	Neuroblast differentiation-associated protein AHNAK	AHNAK	0	NaN	FGFGAKSPKADIKSPSLDVTVPEAELNLETP		NaN	0.281431	NaN	0.218843	NaN	NaN	S	3	0.481379	1.94e-05	79.949	0	0	NaN
Q09666	5749	Q09666	Neuroblast differentiation-associated protein AHNAK	AHNAK	0	NaN	ASISGSKGDLKSSKASLGSLEGEAEAEASSP	2	NaN	0.281431	NaN	0.218843	NaN	NaN	S	2	1	0.00125551	72.755	71.2967	0	NaN
Q09666	5780	Q09666	Neuroblast differentiation-associated protein AHNAK	AHNAK	0	NaN	KGKFSLFKSKKPRHRSNSFSDEREFSGPSTP	2	NaN	0.281431	NaN	0.218843	NaN	NaN	S	2	0.998288	0.0266591	74.147	27.4871	0	NaN
Q09666	135	Q09666	Neuroblast differentiation-associated protein AHNAK	AHNAK	2.69453	3.96044	EYQRIYTTKIKPRLKSEDGVEGDLGETQSRT	1	4.25444	0.281431	4.16671	0.218843	3.97301	3.94787	S	2	1	6.63e-06	187.72	127.257	2.17837	4.21058
Q09666	5110	Q09666	Neuroblast differentiation-associated protein AHNAK	AHNAK	1.69799	1.91416	FDIKSPKFKAEAPLPSPKLEGELQAPDLELS	1	2.1353	0.281431	2.1933	0.218843	1.85387	1.97446	S	2	1	0.0120102	67.997	59.1163	2.06911	2.1643
Q09666	5552	Q09666	Neuroblast differentiation-associated protein AHNAK	AHNAK	1.26991	1.57806	AAPDISVKGPAFNMASPESDFGINLKGPKIK	1	1.99295	0.281431	1.66344	0.218843	1.71152	1.44459	S	2	0.969712	0.00299022	73.809	15.0537	1.24247	1.82819
Q09666	511	Q09666	Neuroblast differentiation-associated protein AHNAK	AHNAK	1.78201	1.32597	QKPKISMQDVDLSLGSPKLKGDIKVSAPGVQ	1	1.57299	0.281431	1.57923	0.218843	1.29156	1.36038	S	2	0.979543	0.00193091	89.011	16.8018	2.89943	1.57611
Q09666	5739	Q09666	Neuroblast differentiation-associated protein AHNAK	AHNAK	1.35195	0.78121	GKGGVTGSPEASISGSKGDLKSSKASLGSLE	1	1.00798	0.281431	1.05471	0.218843	0.726554	0.835867	S	2	0.907875	0.000607614	151.28	9.98188	1.84108	1.03135
Q09666;E9PJZ0;E9PKR9;E9PJC6;E9PLK4;Q09666-2	93;93;93;93;93;93	Q09666	Neuroblast differentiation-associated protein AHNAK	AHNAK	1.89593	0.739743	GHHTVGLKLHRKGDRSPEPGQTWTREVFSSC	1	1.00641	0.281431	0.973354	0.218843	0.724975	0.754511	S	2	1	0.00159467	166.6	83.8911	1.97358	0.98988
Q09666	210	Q09666	Neuroblast differentiation-associated protein AHNAK	AHNAK	0.960714	0.671517	VDVETQSGKTVIRLPSGSGAASPTGSAVDIR	1;2	0.836328	0.281431	1.00698	0.218843	0.554897	0.788137	S	2	0.999931	2.87e-06	207.17	41.6333	1.23084	0.921654
Q09666	5763	Q09666	Neuroblast differentiation-associated protein AHNAK	AHNAK	0.689608	0.643635	ASLGSLEGEAEAEASSPKGKFSLFKSKKPRH	1;2	0.711054	0.281431	1.07649	0.218843	0.429623	0.857648	S	2	0.906379	7.67e-06	195.03	9.85939	0.891508	0.893773
Q09666	177	Q09666	Neuroblast differentiation-associated protein AHNAK	AHNAK	0	0.599685	VDVTGREGAKDIDISSPEFKIKIPRHELTEI	1	0.881116	0.281431	NaN	0.218843	0.599685	NaN	S	2	0.771492	0.00487965	102.03	5.2843	0	0.881116
Q09666	5762	Q09666	Neuroblast differentiation-associated protein AHNAK	AHNAK	0.93395	0.561775	KASLGSLEGEAEAEASSPKGKFSLFKSKKPR	1;2	0.947105	0.281431	0.676719	0.218843	0.665674	0.457876	S	2	0.664908	0.00114392	76.807	2.97599	0.978641	0.811912
Q09666	5841	Q09666	Neuroblast differentiation-associated protein AHNAK	AHNAK	0.664219	0.383099	GGLGSKSKGHYEVTGSDDETGKLQGSGVSLA	1	0.528871	0.281431	0.7376	0.218843	0.24744	0.518757	S	2	0.999955	1.27e-05	258.17	43.5361	0.983019	0.633236
Q09666	3411	Q09666	Neuroblast differentiation-associated protein AHNAK	AHNAK	0	0.131838	GKVKGSKFKMPFLSISSPKVSMPDVELNLKS	1	0.413269	0.281431	NaN	0.218843	0.131838	NaN	S	2	0.655056	0.00887144	82.705	2.81863	0	0.413269
Q09666	570	Q09666	Neuroblast differentiation-associated protein AHNAK	AHNAK	0	0.0406123	PRLGSPSGKTGTCRISMSEVDLNVAAPKVKG	1	0.322043	0.281431	NaN	0.218843	0.0406123	NaN	S	2	0.979443	0.0276058	58.304	16.7802	0	0.322044
Q09666	216	Q09666	Neuroblast differentiation-associated protein AHNAK	AHNAK	0.0730438	-0.0310693	SGKTVIRLPSGSGAASPTGSAVDIRAGAISA	1;2	0.125122	0.281431	0.313014	0.218843	-0.156309	0.0941705	S	2	0.998035	1.15e-12	275.55	27.1053	0.588535	0.219068
Q09666	5731	Q09666	Neuroblast differentiation-associated protein AHNAK	AHNAK	0.269679	-0.0799964	KFNFSKPKGKGGVTGSPEASISGSKGDLKSS	1	0.111432	0.281431	0.22885	0.218843	-0.169999	0.0100064	S	2	0.999996	0.000150013	190.8	54.4709	0.674632	0.170141
Q09666	5790	Q09666	Neuroblast differentiation-associated protein AHNAK	AHNAK	0	-0.210218	KPRHRSNSFSDEREFSGPSTPTGTLEFEGGE	1	0.0712136	0.281431	NaN	0.218843	-0.210218	NaN	S	2	0.693161	0.00077116	70.028	6.32253	0	0.0712136
Q09666	5752	Q09666	Neuroblast differentiation-associated protein AHNAK	AHNAK	0.615452	-0.241373	SGSKGDLKSSKASLGSLEGEAEAEASSPKGK	1;2	-0.0565662	0.281431	0.0740944	0.218843	-0.337997	-0.144749	S	2	1	0.000195941	143.91	66.7178	0.0385296	0.0087641
Q09666	4100	Q09666	Neuroblast differentiation-associated protein AHNAK	AHNAK	0	-0.396966	PKADIDVSGPKVDIDTPDIDIHGPEGKLKGP	1	-0.115535	0.281431	NaN	0.218843	-0.396966	NaN	T	3	1	0.000231602	108.14	108.142	0	-0.115535
Q09666	5782	Q09666	Neuroblast differentiation-associated protein AHNAK	AHNAK	1.29444	-0.775337	KFSLFKSKKPRHRSNSFSDEREFSGPSTPTG	1;2	-0.555863	0.281431	-0.494536	0.218843	-0.837294	-0.713379	S	2	1	0.000314541	182.93	66.1837	1.43031	-0.525199
Q8IVF2-3;Q8IVF2	180;280	Q8IVF2-3	Protein AHNAK2	AHNAK2	0	NaN	QSIKSKRGPGPQRSHSSSEAYEPRDAHDVSP	1	NaN	NaN	0.0833836	NaN	NaN	NaN	S	2	0.925267	0.0254548	56.569	12.0265	0	0.0833836
H0YA43;D6RF73;D6RE68;A9YTQ3;A9YTQ3-3;A9YTQ3-2	52;243;253;397;411;415	H0YA43	Aryl hydrocarbon receptor repressor	AHRR	0	NaN	HRMLSRASGVTGRRETPGPTKPLPWTAGKHS	1	0.742955	NaN	0.469157	NaN	NaN	NaN	T	2	0.970657	0.0652869	48.284	15.1957	0.84946	0.606056
H0YA43;D6RF73;D6RE68;A9YTQ3;A9YTQ3-3;A9YTQ3-2	56;247;257;401;415;419	H0YA43	Aryl hydrocarbon receptor repressor	AHRR	0	NaN	SRASGVTGRRETPGPTKPLPWTAGKHSEDGA	1	0.530171	NaN	NaN	NaN	NaN	NaN	T	2	0.632101	0.0612765	50.194	2.35059	0	0.530171
O95433;B4DUR9;H0YJG7;G3V438;H0YJ63	218;218;164;83;20	O95433	Activator of 90 kDa heat shock protein ATPase homolog 1	AHSA1	0	0.990561	KIPTCKITLKETFLTSPEELYRVFTTQELVQ	1	1.1133	0.122739	NaN	0.0294175	0.990561	NaN	S	2	0.975198	0.00331368	86.214	15.9547	0	1.1133
F5H715;Q96BJ3	138;162	F5H715	Axin interactor, dorsalization-associated protein	AIDA	1.60658	0.880587	SFPARVPGTLLPRLPSEPGMTLLTIRIEKIG	1	0.791356	-0.0549917	1.15153	0.236707	0.846347	0.914827	S	2	0.999996	0.00174176	95.197	54.1092	0.932953	0.971445
A6PVM9;Q9BQI0-3;Q9BQI0;Q9BQI0-2;F5GYC9	77;125;133;159;138	A6PVM9;Q9BQI0-3	Allograft inflammatory factor 1-like	AIF1L	0	0.135856	AVLKLVMMFEGKANESSPKPVGPPPERDIAS	1	-0.0808964	-0.216753	NaN	0.116631	0.135856	NaN	S	2	0.602657	0.0166782	70.334	1.80905	0	-0.0808965
A6PVM9;Q9BQI0-3;Q9BQI0;Q9BQI0-2;F5GYC9	78;126;134;160;139	A6PVM9;Q9BQI0-3	Allograft inflammatory factor 1-like	AIF1L	0.0738197	0.0567383	VLKLVMMFEGKANESSPKPVGPPPERDIASL	1	0.0663992	-0.216753	-0.0530446	0.116631	0.283152	-0.169676	S	2	0.996985	8.36e-05	224.37	25.1947	0.03193	0.00667729
O95831;O95831-3;O95831-4;O95831-6	268;264;268;181	O95831	Apoptosis-inducing factor 1, mitochondrial	AIFM1	2.17403	0.439858	YEKCLIATGGTPRSLSAIDRAGAEVKSRTTL	1	0.311387	-0.123843	0.295605	-0.148881	0.435229	0.444486	S	2	0.999987	0.0147047	115.13	48.8598	1.78125	0.303496
O95831;O95831-3;O95831-4;O95831-6	116;112;116;29	O95831	Apoptosis-inducing factor 1, mitochondrial	AIFM1	0.905579	0.179363	GLGLTPEQKQKKAALSASEGEEVPQDKAPSH	1	0.0909888	-0.123843	-0.00498587	-0.148881	0.214831	0.143895	S	2	0.999432	2.87e-07	216.34	32.4517	0.271768	0.0430015
Q13155;A8MU58	82;4	Q13155	Aminoacyl tRNA synthase complex-interacting multifunctional protein 2	AIMP2	1.52506	0.733202	YELKAAVDGLSKMIQTPDADLDVTNIIQADE	1	0.672108	-0.0954967	0.594644	-0.104154	0.767605	0.698799	T	3	0.999999	5e-27	225.16	61.9081	1.41025	0.633376
O00170;E9PMH2;V9GYQ3	159;96;43	O00170	AH receptor-interacting protein	AIP	0	1.34099	NPQPLIFHMEMLKVESPGTYQQDPWAMTDEE	1	NaN	0.0219061	1.38587	0.0448837	NaN	1.34099	S	2	0.993277	0.00189697	78.098	21.9671	0	1.38587
H0YJL9;Q96IF1	37;263	H0YJL9	LIM domain-containing protein ajuba	AJUBA	0	NaN	AAGPLERRGAQPGRHSVTGYGDCAVGARYQD	1	-0.864833	NaN	-0.870334	NaN	NaN	NaN	S	3	0.999568	4.75e-08	186.99	33.6472	2.69498	-0.867584
H0YJL9;Q96IF1	4;230	H0YJL9	LIM domain-containing protein ajuba	AJUBA	0	NaN	____________XRHSYPPALGSPGALAGAG	1	-1.39475	NaN	-0.972167	NaN	NaN	NaN	S	3	0.999767	2.14e-08	152.64	36.4494	0.94894	-1.18346
Q5T9B7;P00568;H0Y4J6	194;178;119	Q5T9B7	Adenylate kinase isoenzyme 1	AK1	1.88029	1.20711	FYEKRGIVRKVNAEGSVDSVFSQVCTHLDAL	1	1.26532	0.0332292	1.19491	0.0127832	1.23209	1.18212	S	3	0.994683	2.33e-05	117.57	22.7244	1.73958	1.23011
F8W1A4;P54819-2;P54819;P54819-6;P54819-3;P54819-5;F8VY04;P54819-4	151;151;151;104;151;143;109;104	F8W1A4	Adenylate kinase 2, mitochondrial;Adenylate kinase 2, mitochondrial;Adenylate kinase 2, mitochondrial, N-terminally processed	AK2	0	0.52071	IRRITGRLIHPKSGRSYHEEFNPPKEPMKDD	1	0.414352	-0.106358	NaN	-0.0993554	0.52071	NaN	S	2	0.99713	0.0401136	48.527	25.4092	0	0.414352
Q92667;Q92667-2;I3L2A2;I3L2N7;I3L0K6	107;107;107;107;107	Q92667	A-kinase anchor protein 1, mitochondrial	AKAP1	1.01123	0.993696	PPALLQTHPPCRRSESSGILPNTTDMRLRPG	1	0.672561	-0.167831	0.835924	-0.311077	0.840392	1.147	S	2	0.988566	0.00123982	124.89	19.8343	1.1632	0.754243
Q92667;Q92667-2;I3L2A2;I3L2N7	151;151;151;151	Q92667	A-kinase anchor protein 1, mitochondrial	AKAP1	0	0.977742	TGGEAKSIPLECPLSSPKGVLFSSKSAEVCK	1	NaN	-0.167831	0.666666	-0.311077	NaN	0.977742	S	2	0.687907	0.00195192	132.81	3.43246	0	0.666666
Q92667;Q92667-2;I3L2A2;I3L2N7	150;150;150;150	Q92667	A-kinase anchor protein 1, mitochondrial	AKAP1	0	0.879854	LTGGEAKSIPLECPLSSPKGVLFSSKSAEVC	1	0.712023	-0.167831	NaN	-0.311077	0.879854	NaN	S	2	0.782771	0.00194757	147.12	5.56717	0	0.712023
Q92667;I3L0W0;I3NI36	592;168;174	Q92667	A-kinase anchor protein 1, mitochondrial	AKAP1	0	0.466137	SMDSVDSCCSLKKTESFQNAQAGSNPKKVDL	1	0.298306	-0.167831	NaN	-0.311077	0.466137	NaN	S	2	0.96641	0.00305545	70.897	14.5934	0	0.298306
Q92667;Q92667-2;I3NI36	445;445;27	Q92667	A-kinase anchor protein 1, mitochondrial	AKAP1	1.48868	0.323963	PPPKTYVSCLKSLLSSPTKDSKPNISAHHIS	1	0.1396	-0.167831	0.0294175	-0.311077	0.307432	0.340494	S	2	0.99193	0.00428851	136.36	20.9414	0.43441	0.084509
Q92667;Q92667-2	429;429	Q92667	A-kinase anchor protein 1, mitochondrial	AKAP1	1.75914	-1.30967	PPDAGLPLPGLPAEGSPPPKTYVSCLKSLLS	1	-1.44167	-0.167831	-1.65658	-0.311077	-1.27384	-1.3455	S	3	1	1.32e-10	96.56	77.476	1.35568	-1.54913
O43572;E7EMD6	173;173	O43572	A-kinase anchor protein 10, mitochondrial	AKAP10	0	NaN	AESFHSTTWSRIRAHSLNTVKQSSLAEPVSP	1	NaN	NaN	NaN	NaN	NaN	NaN	S	2	0.999997	0.00251102	140.09	56.0337	0	NaN
O43572;E7EMD6;J3QR74	52;52;52	O43572	A-kinase anchor protein 10, mitochondrial	AKAP10	0	NaN	KTSDVKSIKASISVHSPQKSTKNHALLEAAG	1	0.00417777	NaN	-0.000418409	NaN	NaN	NaN	S	2	1	6.18e-06	202.15	77.8184	0.24907	0.00187968
O43572;E7EMD6	281;281	O43572	A-kinase anchor protein 10, mitochondrial	AKAP10	0	NaN	ESSSTLTVASRNSPASPLKELSGKLMKSIEQ	1	-0.605113	NaN	NaN	NaN	NaN	NaN	S	2	0.999993	0.024307	68.836	51.4087	0	-0.605113
O43572;E7EMD6	187;187	O43572	A-kinase anchor protein 10, mitochondrial	AKAP10	0	NaN	HSLNTVKQSSLAEPVSPSKKHETTASFLTDS	1	0.432425	NaN	0.403268	NaN	NaN	NaN	S	2	0.95431	0.00105799	179.9	13.1987	1.6536	0.417846
Q9UKA4	133	Q9UKA4	A-kinase anchor protein 11	AKAP11	0	2.5586	SHPSGMLCVMRVSPTSPRLRIDFIFSLLSKY	1	2.52454	-0.0340569	2.06008	NaN	2.5586	NaN	S	2	0.807652	0.0203518	77.14	6.23149	1.19196	2.29231
Q9UKA4	18	Q9UKA4	A-kinase anchor protein 11	AKAP11	0	1.52755	TFRNNHMKTKASVRKSFSEDVFQSVKSLLQS	1	1.49349	-0.0340569	1.6897	NaN	1.52755	NaN	S	2	0.968453	0.00325277	132.31	14.8712	1.40682	1.5916
Q9UKA4	433	Q9UKA4	A-kinase anchor protein 11	AKAP11	0	1.14101	RKPESPYGNLCDAPDSPRPVKASREDSGLFS	1	1.10695	-0.0340569	NaN	NaN	1.14101	NaN	S	3	1	8.87e-06	151.06	120.505	0	1.10695
Q9UKA4	448	Q9UKA4	A-kinase anchor protein 11	AKAP11	0	1.08411	SPRPVKASREDSGLFSPIRSSAFSPLGGCTP	1	1.05005	-0.0340569	1.37473	NaN	1.08411	NaN	S	2	0.995486	0.00697822	88.075	23.4349	1.07191	1.21239
Q9UKA4	1580	Q9UKA4	A-kinase anchor protein 11	AKAP11	0	0.934933	ETTKSADRVTYAEKLSPLTGQACRYCDLKEL	1	0.900876	-0.0340569	NaN	NaN	0.934933	NaN	S	2	1	0.00212473	103.44	63.5611	0	0.900876
Q9UKA4	1485	Q9UKA4	A-kinase anchor protein 11	AKAP11	0	0.0553944	KEELTASLVGLPKSLTDSCLFEKSGYEEDNE	1	0.0213375	-0.0340569	NaN	NaN	0.0553944	NaN	T	2	0.986943	0.0021849	117.7	18.8022	0	0.0213375
Q9UKA4	1242	Q9UKA4	A-kinase anchor protein 11	AKAP11	0	-0.0141614	KVKNPCLNVQSQRSVSPTFLNPSDENLKTLC	1	-0.0482183	-0.0340569	-0.084854	NaN	-0.0141614	NaN	S	2	0.999799	0.000688647	169.06	37.7518	0.766931	-0.0665361
Q9UKA4	981	Q9UKA4	A-kinase anchor protein 11	AKAP11	0	-0.0574991	VYKESLPVSGEESQLTPEKSPKFPDSQNQLT	1	-0.091556	-0.0340569	-0.0193166	NaN	-0.0574991	NaN	T	2	0.999904	1.02e-05	221.51	40.1906	0.434593	-0.0554363
Q9UKA4	1100	Q9UKA4	A-kinase anchor protein 11	AKAP11	0	-0.128904	VEDKQKVRDRNVIPDTPPSTPLVPSRASSEW	1	-0.162961	-0.0340569	0.0790197	NaN	-0.128904	NaN	T	2	0.998049	0.00110889	90.718	28.1012	0.103788	-0.0419706
Q02952;Q02952-3;Q02952-2	1391;1286;1293	Q02952	A-kinase anchor protein 12	AKAP12	0	NaN	QTVNVPIIDGAKEVSSLEGSPPPCLGQEEAV		NaN	0.0597706	NaN	0.0137839	NaN	NaN	S	3	0.494614	1.01e-06	158.94	0	0	NaN
Q02952;Q02952-3;Q02952-2	696;591;598	Q02952	A-kinase anchor protein 12	AKAP12	0	NaN	ALICVGSSKKRARRGSSSDEEGGPKAMGGDH	2	NaN	0.0597706	NaN	0.0137839	NaN	NaN	S	2	0.988618	0.00073394	130.01	19.0031	0	NaN
Q02952;Q02952-3;Q02952-2	697;592;599	Q02952	A-kinase anchor protein 12	AKAP12	0	NaN	LICVGSSKKRARRGSSSDEEGGPKAMGGDHQ	2	NaN	0.0597706	NaN	0.0137839	NaN	NaN	S	2	0.603645	0.00251085	75.548	1.61978	0	NaN
Q02952;Q02952-3;Q02952-2	698;593;600	Q02952	A-kinase anchor protein 12	AKAP12	0	NaN	ICVGSSKKRARRGSSSDEEGGPKAMGGDHQK	2	NaN	0.0597706	NaN	0.0137839	NaN	NaN	S	2	0.916136	0.00073394	130.01	10.3296	0	NaN
Q02952;Q02952-3;Q02952-2	629;524;531	Q02952	A-kinase anchor protein 12	AKAP12	0	NaN	KKMVTPKKRVRRPSESDKEDELDKVKSATLS	2	NaN	0.0597706	NaN	0.0137839	NaN	NaN	S	3	1	0.000227658	202.94	93.4953	0	NaN
Q02952;Q02952-3;Q02952-2	648;543;550	Q02952	A-kinase anchor protein 12	AKAP12	0	NaN	DELDKVKSATLSSTESTASEMQEEMKGSVEE	2	NaN	0.0597706	NaN	0.0137839	NaN	NaN	S	2	0.925074	4.78e-05	148.26	12.0181	0	NaN
Q02952;Q02952-3;Q02952-2	651;546;553	Q02952	A-kinase anchor protein 12	AKAP12	0	NaN	DKVKSATLSSTESTASEMQEEMKGSVEEPKP	2	NaN	0.0597706	NaN	0.0137839	NaN	NaN	S	2	0.995779	4.78e-05	148.26	23.744	0	NaN
Q02952;Q02952-3;Q02952-2	780;675;682	Q02952	A-kinase anchor protein 12	AKAP12	0	NaN	LVTPRKKSKSKLEEKSEDSIAGSGVEHSTPD	2	NaN	0.0597706	NaN	0.0137839	NaN	NaN	S	2	1	2.2e-05	142.65	74.1939	0	NaN
Q02952;Q02952-3;Q02952-2	783;678;685	Q02952	A-kinase anchor protein 12	AKAP12	0	NaN	PRKKSKSKLEEKSEDSIAGSGVEHSTPDTEP	2	NaN	0.0597706	NaN	0.0137839	NaN	NaN	S	2	0.999998	2.2e-05	142.65	56.0779	0	NaN
Q02952;Q02952-3;Q02952-2	554;449;456	Q02952	A-kinase anchor protein 12	AKAP12	0	1.53979	GGDEESGEHTQVPADSPDSQEEQKGESSASS	1	1.59956	0.0597706	NaN	0.0137839	1.53978	NaN	S	3	0.998648	1.39e-05	121.07	28.6899	0	1.59956
Q02952;Q02952-3;Q02952-2	483;378;385	Q02952	A-kinase anchor protein 12	AKAP12	1.20044	1.53074	ETCVSGEDPTQGADLSPDEKVLSKPPEGVVS	1	1.43845	0.0597706	1.69657	0.0137839	1.37868	1.68279	S	2	1	1.5e-19	285.57	96.3269	1.28152	1.56751
Q02952;Q02952-3;Q02952-2	1760;1655;1662	Q02952	A-kinase anchor protein 12	AKAP12	1.60344	1.24937	ELQEGKVHSESDKAITPQAQEELQKQERESA	1	1.26021	0.0597706	1.31208	0.0137839	1.20043	1.2983	T	2	1	0.00177489	147.14	97.2353	1.89152	1.28615
Q02952;Q02952-3;Q02952-2	286;181;188	Q02952	A-kinase anchor protein 12	AKAP12	2.4512	1.22484	EKQEKEPSKSAESPTSPVTSETGSTFKKFFT	1;2	1.27781	0.0597706	1.24544	0.0137839	1.21803	1.23165	S	2	0.999839	1.24e-07	216.44	39.5261	2.08794	1.26162
Q02952;Q02952-3;Q02952-2	887;782;789	Q02952	A-kinase anchor protein 12	AKAP12	0.744553	0.848013	PEQKAATEVSKELSESQVHMMAAAVADGTRA	1	1.15426	0.0597706	0.615322	0.0137839	1.09449	0.601538	S	3	0.996997	0.000283933	77.576	25.2175	0.725369	0.884791
Q02952;Q02952-3;Q02952-2	1116;1011;1018	Q02952	A-kinase anchor protein 12	AKAP12	1.55187	0.80646	AKTEPFTQGKVVGQTTPESFEKAPQVTESIE	1	0.901803	0.0597706	0.784671	0.0137839	0.842033	0.770888	T	2	0.992825	0.00166923	153.05	21.9837	1.35512	0.843237
Q02952;Q02952-3;Q02952-2	1727;1622;1629	Q02952	A-kinase anchor protein 12	AKAP12	0	0.795502	SALADTDASGGLTKESPDTNGPKQKEKEDAQ	1	0.855272	0.0597706	NaN	0.0137839	0.795502	NaN	S	3	0.993661	8.59e-16	219.5	22.465	0	0.855272
Q02952;Q02952-3;Q02952-2	371;266;273	Q02952	A-kinase anchor protein 12	AKAP12	2.27869	0.793019	AHPQEPAESAHEPRLSAEYEKVELPSEEQVS	1	0.846233	0.0597706	0.813361	0.0137839	0.786462	0.799577	S	3	1	2.62e-50	341.62	66.383	1.89935	0.829796
Q02952;Q02952-3;Q02952-2	1390;1285;1292	Q02952	A-kinase anchor protein 12	AKAP12	0	0.657001	LQTVNVPIIDGAKEVSSLEGSPPPCLGQEEA	1	0.716771	0.0597706	NaN	0.0137839	0.657001	NaN	S	3	0.847103	1.01e-06	158.94	7.87729	0	0.716771
Q02952;Q02952-3;Q02952-2	1395;1290;1297	Q02952	A-kinase anchor protein 12	AKAP12	1.07793	0.625618	VPIIDGAKEVSSLEGSPPPCLGQEEAVCTKI	1	0.767994	0.0597706	0.556797	0.0137839	0.708223	0.543013	S	2	0.992347	7.52e-06	150.17	23.698	0.99722	0.662395
Q02952;Q02952-3;Q02952-2	885;780;787	Q02952	A-kinase anchor protein 12	AKAP12	0	0.601538	EQPEQKAATEVSKELSESQVHMMAAAVADGT	1	NaN	0.0597706	0.615322	0.0137839	NaN	0.601538	S	3	0.49999	0.00339134	45.916	0	0	0.615322
Q02952;Q02952-3;Q02952-2	597;492;499	Q02952	A-kinase anchor protein 12	AKAP12	0	0.564044	GLAEVQQDGEAEEGATSDGEKKREGVTPWAS	1	NaN	0.0597706	0.577828	0.0137839	NaN	0.564044	T	2	0.500103	0.000801359	71.297	0.00178103	0	0.577828
Q02952;Q02952-3;Q02952-2	1331;1226;1233	Q02952	A-kinase anchor protein 12	AKAP12	1.4646	0.455676	KDDALELQSHAKSPPSPVEREMVVQVEREKT	1	0.540027	0.0597706	0.444879	0.0137839	0.480257	0.431095	S	2	0.999958	0.00394731	145.46	43.7321	1.21246	0.492453
Q02952;Q02952-3;Q02952-2	248;143;150	Q02952	A-kinase anchor protein 12	AKAP12	0.906576	0.403701	KQSTEKPEETLKREQSHAEISPPAESGQAVE	1	0.383829	0.0597706	0.497127	0.0137839	0.324058	0.483343	S	3	1	1.32e-08	181.72	66.2727	1.08923	0.440478
Q02952;Q02952-3;Q02952-2	381;276;283	Q02952	A-kinase anchor protein 12	AKAP12	3.39244	0.373485	HEPRLSAEYEKVELPSEEQVSGSQGPSEEKP	1	0.433494	0.0597706	0.387032	0.0137839	0.373723	0.373248	S	2	1	2.56e-08	218.16	92.3709	1.44358	0.410263
Q02952;Q02952-3;Q02952-2	598;493;500	Q02952	A-kinase anchor protein 12	AKAP12	1.2634	0.358654	LAEVQQDGEAEEGATSDGEKKREGVTPWASF	1	0.449218	0.0597706	0.341644	0.0137839	0.389448	0.32786	S	2	0.978498	9.46e-24	308.99	16.5808	1.06517	0.395431
Q02952;Q02952-3;Q02952-2	612;507;514	Q02952	A-kinase anchor protein 12	AKAP12	1.10182	0.310745	TSDGEKKREGVTPWASFKKMVTPKKRVRRPS	1	0.331705	0.0597706	0.363339	0.0137839	0.271935	0.349555	S	2	1	0.00046779	185.66	81.3994	1.53828	0.347522
Q02952;Q02952-3;Q02952-2	283;178;185	Q02952	A-kinase anchor protein 12	AKAP12	0.368468	0.150562	EGEEKQEKEPSKSAESPTSPVTSETGSTFKK	1;2	0.330214	0.0597706	0.044464	0.0137839	0.270444	0.0306801	S	2	0.999723	8.05e-06	194.08	36.6687	0.382171	0.187339
Q02952;Q02952-3;Q02952-2	627;522;529	Q02952	A-kinase anchor protein 12	AKAP12	2.55412	0.143241	SFKKMVTPKKRVRRPSESDKEDELDKVKSAT	1;2	0.20364	0.0597706	0.156397	0.0137839	0.143869	0.142613	S	3	1	5.32e-05	241.51	93.4953	1.0806	0.180018
Q02952;Q02952-3;Q02952-2	793;688;695	Q02952	A-kinase anchor protein 12	AKAP12	0.354031	0.142299	EKSEDSIAGSGVEHSTPDTEPGKEESWVSIK	1	0.0833836	0.0597706	0.274769	0.0137839	0.023613	0.260985	T	2	0.975162	4.05e-16	273.46	15.9407	0.505249	0.179076
Q02952;Q02952-3;Q02952-2	347;242;249	Q02952	A-kinase anchor protein 12	AKAP12	0.557227	0.0441512	PEKVDTEEDGKAEVASEKLTASEQAHPQEPA	1	0.0833836	0.0597706	0.0784732	0.0137839	0.023613	0.0646893	S	2	1	8.84e-15	319.81	233.688	1.71427	0.0809284
Q02952;Q02952-3;Q02952-2	505;400;407	Q02952	A-kinase anchor protein 12	AKAP12	0.497915	-0.227613	SKPPEGVVSEVEMLSSQERMKVQGSPLKKLF	1	-0.291928	0.0597706	-0.0897432	0.0137839	-0.351698	-0.103527	S	3	0.953553	3.07e-11	229.56	13.1238	0.508456	-0.190835
Q02952;Q02952-3;Q02952-2	514;409;416	Q02952	A-kinase anchor protein 12	AKAP12	0	-0.304528	EVEMLSSQERMKVQGSPLKKLFTSTGLKKLS	1	NaN	0.0597706	-0.290745	0.0137839	NaN	-0.304528	S	2	1	0.00106552	126.03	126.026	0	-0.290745
Q02952;Q02952-3;Q02952-2	569;464;471	Q02952	A-kinase anchor protein 12	AKAP12	0	-0.371886	SPDSQEEQKGESSASSPEEPEEITCLEKGLA	1;2	NaN	0.0597706	-0.358103	0.0137839	NaN	-0.371887	S	2	0.99952	3.02e-05	156.78	33.9381	0	-0.358103
Q02952;Q02952-3;Q02952-2	557;452;459	Q02952	A-kinase anchor protein 12	AKAP12	1.2621	-0.622815	EESGEHTQVPADSPDSQEEQKGESSASSPEE	1	-0.509409	0.0597706	-0.662666	0.0137839	-0.56918	-0.67645	S	3	0.999976	1.45e-06	166.44	46.2601	1.08211	-0.586038
Q02952;Q02952-3;Q02952-2	388;283;290	Q02952	A-kinase anchor protein 12	AKAP12	1.39483	-0.755496	EYEKVELPSEEQVSGSQGPSEEKPAPLATEV	1	-0.647852	0.0597706	-0.789586	0.0137839	-0.707622	-0.80337	S	2	0.999874	1.2e-10	254.9	39.6083	1.20363	-0.718719
Q02952;Q02952-3;Q02952-2	1587;1482;1489	Q02952	A-kinase anchor protein 12	AKAP12	0.494224	-0.790954	LTSELQTQAHVIKADSQDAGQETEKEGEEPQ	1	-1.16676	0.0597706	-0.341592	0.0137839	-1.22653	-0.355376	S	2	1	0.00194809	145.39	110.539	0.496639	-0.754177
Q02952;Q02952-3;Q02952-2	544;439;446	Q02952	A-kinase anchor protein 12	AKAP12	1.40202	-0.824425	SGKKQKGKRGGGDEESGEHTQVPADSPDSQE	1	-0.816037	0.0597706	-0.759258	0.0137839	-0.875808	-0.773042	S	3	0.999904	4.37e-11	184.13	40.1648	1.63948	-0.787648
Q02952;Q02952-3;Q02952-2	568;463;470	Q02952	A-kinase anchor protein 12	AKAP12	0	-0.84977	DSPDSQEEQKGESSASSPEEPEEITCLEKGL	1;2	NaN	0.0597706	-0.835986	0.0137839	NaN	-0.84977	S	2	0.998574	3.02e-05	156.78	29.2442	0	-0.835986
Q12802;Q12802-2;Q12802-4;A8MYJ1	1932;1936;1914;177	Q12802	A-kinase anchor protein 13	AKAP13	0	NaN	ENMSNTWKFLSHSTDSLNKISKVNESTESLT	2	NaN	0.243547	NaN	0.328951	NaN	NaN	S	2	0.99998	0.00111632	215.93	46.9504	0	NaN
Q12802;Q12802-2;Q12802-4;H0YMW2;H0YLH1	1507;1507;1507;1507;61	Q12802	A-kinase anchor protein 13	AKAP13	0.915681	1.4781	SLSQILKPNRSRDRQSLDGFYSHGMGAEGRE	1	2.00705	0.243547	1.52165	0.328951	1.76351	1.1927	S	3	1	2.33e-06	192.2	79.3028	1.06035	1.76435
Q12802;Q12802-2;Q12802-4;A8MYJ1	2563;2567;2543;808	Q12802	A-kinase anchor protein 13	AKAP13	0	1.03402	DQKLVLSERALTRSLSRPSSLIEQEKQRSLE	1	1.27757	0.243547	NaN	0.328951	1.03402	NaN	S	2	0.993663	0.00295163	170.59	22.0427	0	1.27757
Q12802;Q12802-2;Q12802-4;H0YMW2	790;790;790;790	Q12802	A-kinase anchor protein 13	AKAP13	0	0.917567	PDQAVISDSTFSLANSPGSESVTKDDALSFV	1	1.16111	0.243547	NaN	0.328951	0.917567	NaN	S	3	0.945874	2.2e-05	85.287	13.4766	0	1.16111
Q12802;Q12802-2;Q12802-4;H0YMW2	1282;1282;1282;1282	Q12802	A-kinase anchor protein 13	AKAP13	1.20872	0.673413	GALLTEGEACHMSLSSPELGPLTKGLESAFT	1	0.982583	0.243547	0.936742	0.328951	0.739036	0.60779	S	3	0.946578	2.1e-19	231.16	12.6145	1.81809	0.959662
Q12802;Q12802-2;Q12802-4;H0YMW2	649;649;649;649	Q12802	A-kinase anchor protein 13	AKAP13	0.972352	0.50905	NSETNSSHAQSQKGKSSPICSTTGDDKLCAD	1	0.666575	0.243547	0.924024	0.328951	0.423028	0.595073	S	2	0.5	0.00604903	79.652	0	0.990739	0.795299
Q12802;Q12802-2;Q12802-4;H0YMW2	650;650;650;650	Q12802	A-kinase anchor protein 13	AKAP13	0.972352	0.50905	SETNSSHAQSQKGKSSPICSTTGDDKLCADS	1	0.666575	0.243547	0.924024	0.328951	0.423028	0.595073	S	2	0.5	0.00604903	79.652	0	0.990739	0.795299
Q12802;Q12802-2;Q12802-4;H0YMW2	953;953;953;953	Q12802	A-kinase anchor protein 13	AKAP13	0.288495	0.493028	KENALSSGTLQEEQRTPPPGQDTQQFHEKSI	1	0.22033	0.243547	1.33822	0.328951	-0.0232173	1.00927	T	4	0.999997	7.48e-08	163.29	55.0532	0.402177	0.779277
Q12802;Q12802-2;Q12802-4;H0YMW2	1281;1281;1281;1281	Q12802	A-kinase anchor protein 13	AKAP13	0	0.463801	AGALLTEGEACHMSLSSPELGPLTKGLESAF	1	0.707348	0.243547	NaN	0.328951	0.463801	NaN	S	3	0.640322	1.65e-05	119.42	2.93847	0	0.707348
Q12802;Q12802-2;Q12802-4;A8MYJ1	2398;2402;2378;643	Q12802	A-kinase anchor protein 13	AKAP13	0.683892	0.398	FRDMAECSTPLPEDCSPTHSPRVLFRSNTEE	1	0.775767	0.243547	0.592732	0.328951	0.53222	0.263781	S	3	0.819743	0.000273276	72.935	6.9176	1.0724	0.68425
Q12802;Q12802-2;Q12802-4;H0YMW2	983;983;983;983	Q12802	A-kinase anchor protein 13	AKAP13	1.38207	0.328869	ISADCAKDKALQLSNSPGASSAFLKAETEHN	1	0.59388	0.243547	0.636358	0.328951	0.350332	0.307406	S	2	0.999995	6.17e-07	239.43	54.1579	1.65812	0.615119
Q12802;Q12802-2;Q12802-4;H0YMW2	815;815;815;815	Q12802	A-kinase anchor protein 13	AKAP13	0	0.116424	DALSFVPSQKEKGTATPELHTATDYRDGPDG	1	0.359971	0.243547	NaN	0.328951	0.116424	NaN	T	2	0.987924	0.00219369	83.404	19.1294	0	0.359971
Q12802;Q12802-2;Q12802-4;H0YMW2;H0YLH1	1647;1651;1629;1629;223	Q12802	A-kinase anchor protein 13	AKAP13	0	0.110193	HPFSGEERVDSLVSLSEEDLESDQREHRMFD	1	NaN	0.243547	0.439144	0.328951	NaN	0.110193	S	2	0.989318	0.000495567	93.776	19.7469	0	0.439144
Q12802;Q12802-2;Q12802-4;A8MYJ1	2728;2732;2708;973	Q12802	A-kinase anchor protein 13	AKAP13	0.0860091	0.0411799	PSIAKSGSLDSELSVSPKRNSISRTHKDKGP	1	0.426748	0.243547	0.228111	0.328951	0.183201	-0.100841	S	2	0.991689	0.000185709	227	20.7694	0.727024	0.327429
Q12802;Q12802-2;Q12802-4;H0YMW2;H0YLH1	1602;1606;1584;1584;178	Q12802	A-kinase anchor protein 13	AKAP13	0.0319843	0.0145284	LGDVVRRPPIHRRSFSLEGLTGGAGVGNKPS	1	0.387804	0.243547	0.213752	0.328951	0.144257	-0.1152	S	2	0.999842	3.34e-06	187.75	38.0109	0.746417	0.300778
Q12802;Q12802-2;Q12802-4;A8MYJ1	2709;2713;2689;954	Q12802	A-kinase anchor protein 13	AKAP13	0.00542597	0.00109925	LMRIPSFFPSPEEPPSPSAPSIAKSGSLDSE	1	0.301002	0.243547	0.273695	0.328951	0.057455	-0.0552565	S	2	0.925907	4.79e-05	132.39	11.0421	1.51961	0.287349
Q12802;Q12802-2;Q12802-4;H0YMW2	1149;1149;1149;1149	Q12802	A-kinase anchor protein 13	AKAP13	0	-0.0682462	VALQDKAVTDPQGVGTPEMIPLDWEKGKLEG	1	0.175301	0.243547	NaN	0.328951	-0.0682462	NaN	T	2	0.999999	0.000894558	77.445	58.6472	0	0.175301
Q12802;Q12802-2;Q12802-4;H0YMW2	1690;1694;1672;1672	Q12802	A-kinase anchor protein 13	AKAP13	0	-0.131581	NYCTSAISSPLTKSISLMTISHPGLDNSRPF	1	0.111966	0.243547	NaN	0.328951	-0.131581	NaN	S	2	0.98065	0.0111376	67.227	17.3135	0	0.111966
Q12802;Q12802-2;Q12802-4;A8MYJ1	2345;2349;2325;590	Q12802	A-kinase anchor protein 13	AKAP13	0.940354	-0.15145	DTINTLNRDEDEGIPSENEEEKKMLDTRARE	1	0.119688	0.243547	0.14991	0.328951	-0.123859	-0.179042	S	2	1	4.69e-05	121.72	48.8985	1.14833	0.134799
Q12802;Q12802-2;Q12802-4;A8MYJ1	1876;1880;1858;121	Q12802	A-kinase anchor protein 13	AKAP13	0.360837	-0.22289	VIMRNKPSQPKERPRSAVLLVDETATTPIFA	1	0.202512	0.243547	-0.0757937	0.328951	-0.0410355	-0.404745	S	2	1	0.000255481	139.11	104.893	0.137873	0.063359
Q12802;Q12802-2;Q12802-4;A8MYJ1	1929;1933;1911;174	Q12802	A-kinase anchor protein 13	AKAP13	1.5281	-0.460694	GNDENMSNTWKFLSHSTDSLNKISKVNESTE	1;2	-0.238613	0.243547	-0.110277	0.328951	-0.48216	-0.439229	S	2	0.994487	0.00111632	241.15	22.5661	0.648988	-0.174445
Q12802;Q12802-2;Q12802-4;H0YMW2;H0YLH1	1565;1565;1565;1565;119	Q12802	A-kinase anchor protein 13	AKAP13	0.669126	-0.473843	VLRSSMRSLSPFRRHSWGPGKNAASDAEMNH	1	-0.0645402	0.243547	-0.310647	0.328951	-0.308087	-0.639598	S	2	1	0.0147047	115.13	74.1727	0.432279	-0.187594
Q02040	638	Q02040	A-kinase anchor protein 17A	AKAP17A	0	NaN	PHKKHAYKDDSPRRRSTSPDHTRSRRSHSKD	2	NaN	0.433707	NaN	0.558268	NaN	NaN	S	2	0.774807	0.0101102	79.889	5.36538	0	NaN
Q02040	640	Q02040	A-kinase anchor protein 17A	AKAP17A	0	NaN	KKHAYKDDSPRRRSTSPDHTRSRRSHSKDRH	2	NaN	0.433707	NaN	0.558268	NaN	NaN	S	2	0.99981	0.0101102	79.889	36.2763	0	NaN
Q02040	639	Q02040	A-kinase anchor protein 17A	AKAP17A	0	NaN	HKKHAYKDDSPRRRSTSPDHTRSRRSHSKDR	2	NaN	0.433707	NaN	0.558268	NaN	NaN	T	2	0.551154	0.0384946	43.68	0.836898	0	NaN
Q02040	537	Q02040	A-kinase anchor protein 17A	AKAP17A	0.610146	-0.231014	CKEVQSSCRVVPEDGSPEKRCPGGVLSCIPD	1	0.296428	0.433707	0.23352	0.558268	-0.137279	-0.324748	S	2	1	0.00126743	129.54	103.761	1.12367	0.264974
Q9Y2D5-6;Q9Y2D5-4;Q9Y2D5-5;Q9Y2D5-7;Q9Y2D5;C9JVY5	383;383;241;241;152;201	Q9Y2D5-6	A-kinase anchor protein 2	AKAP2	0	NaN	SQPRDALGDSLQVPVSPSSTTSSRCSSRDGE	1	0.555914	NaN	0.486354	NaN	NaN	NaN	S	3	0.977298	0.000133002	114.21	18.7999	1.37238	0.521134
Q9Y2D5-6;Q9Y2D5-4;Q9Y2D5-5;Q9Y2D5-7;Q9Y2D5;C9JVY5	385;385;243;243;154;203	Q9Y2D5-6	A-kinase anchor protein 2	AKAP2	0	NaN	PRDALGDSLQVPVSPSSTTSSRCSSRDGEFT		NaN	NaN	NaN	NaN	NaN	NaN	S	2	0.480654	5.56e-06	168.25	2.29106	0	NaN
Q9Y2D5-6;Q9Y2D5-4;Q9Y2D5-5;Q9Y2D5-7;Q9Y2D5;C9JVY5	606;606;464;464;375;424	Q9Y2D5-6	A-kinase anchor protein 2	AKAP2	0	NaN	GSVNSDKPLTNPRPPSVGGPPEDSGASAAKG	1	1.99164	NaN	1.49518	NaN	NaN	NaN	S	3	0.999998	2.86e-06	141.38	56.8511	1.04557	1.74341
Q9Y2D5-6;Q9Y2D5-4;Q9Y2D5-5;Q9Y2D5-7;Q9Y2D5;C9JVY5	861;861;719;719;630;679	Q9Y2D5-6	A-kinase anchor protein 2	AKAP2	0	NaN	FGSEKPQSMFEPPQVSSPVQEKRDVLPKILP	1	-0.100871	NaN	0.0133551	NaN	NaN	NaN	S	2	0.63379	0.000100333	125.04	2.38215	0.233736	-0.0437579
Q9Y2D5-6;Q9Y2D5-4;Q9Y2D5-5;Q9Y2D5-7;Q9Y2D5;C9JVY5	862;862;720;720;631;680	Q9Y2D5-6	A-kinase anchor protein 2	AKAP2	0	NaN	GSEKPQSMFEPPQVSSPVQEKRDVLPKILPA	1	0.151339	NaN	-0.0348991	NaN	NaN	NaN	S	2	0.869119	6.67e-05	171.9	8.22201	0.190923	0.0582201
Q9Y2D5-6;Q9Y2D5-4;Q9Y2D5-5;Q9Y2D5-7;Q9Y2D5	979;979;837;837;748	Q9Y2D5-6	A-kinase anchor protein 2	AKAP2	0	NaN	EEELKRQRQVLQSTQSPRTKNAPSLPSRTCY	1	1.5955	NaN	1.59168	NaN	NaN	NaN	S	2	0.999996	0.00147823	221.66	54.8911	3.11697	1.59359
Q9Y2D5-6;Q9Y2D5-4;Q9Y2D5-5;Q9Y2D5-7;C9JVY5	226;226;84;84;44	Q9Y2D5-6	A-kinase anchor protein 2	AKAP2	0	NaN	DNYSATLLEPAASSLSPDHKNMEIEVSVAEC	1	NaN	NaN	0.665848	NaN	NaN	NaN	S	3	0.943638	3.52e-05	104.54	13.5738	0	0.665848
Q9Y2D5-6;Q9Y2D5-4;Q9Y2D5-5;Q9Y2D5-7;Q9Y2D5;C9JVY5	624;624;482;482;393;442	Q9Y2D5-6	A-kinase anchor protein 2	AKAP2	0	NaN	GPPEDSGASAAKGQKSPGALETPSAAGSQGN	1	0.760519	NaN	0.830742	NaN	NaN	NaN	S	2	1	9.76e-15	253.77	107.099	1.55166	0.795631
Q9Y2D5-6;Q9Y2D5-4;Q9Y2D5-5;Q9Y2D5-7;Q9Y2D5;C9JVY5	696;696;554;554;465;514	Q9Y2D5-6	A-kinase anchor protein 2	AKAP2	0	NaN	DDHGILDQFSRSVNVSLTQEELDSGLDELSV	1	0.0306892	NaN	-0.0307518	NaN	NaN	NaN	S	2	0.841024	0.00729129	50.029	9.89222	0.000281945	-3.13e-05
Q9Y2D5-6;Q9Y2D5-4;Q9Y2D5-5;Q9Y2D5-7;Q9Y2D5	1009;1009;867;867;778	Q9Y2D5-6	A-kinase anchor protein 2	AKAP2	0	NaN	YKTAPGKIEKVKPPPSPTTEGPSLQPDLAPE	1	-0.452096	NaN	-3.69453	NaN	NaN	NaN	S	4	0.693923	7.03e-09	158.73	6.56515	0.374191	-2.07331
P24588	178	P24588	A-kinase anchor protein 5	AKAP5	0	NaN	IQTQTPLNDQATKAKSTQDLSEGISRKDGDE	1	0.23352	NaN	0.324926	NaN	NaN	NaN	S	2	0.895361	0.00161799	174.68	9.32304	0.985961	0.279223
P24588	179	P24588	A-kinase anchor protein 5	AKAP5	0	NaN	QTQTPLNDQATKAKSTQDLSEGISRKDGDEV	1	0.468531	NaN	NaN	NaN	NaN	NaN	T	2	0.5	0.00328811	136.33	0	0	0.468531
O43823;M0QYL4	328;142	O43823	A-kinase anchor protein 8	AKAP8	0.637214	0.213611	EPDTKLARVDSEGDFSENDDAAGDFRSGDEE	1	0.129481	-0.165062	0.104739	-0.0279397	0.294543	0.132679	S	2	1	8.07e-10	254.11	104.379	1.17392	0.11711
O43823;M0QYL4	339;153	O43823	A-kinase anchor protein 8	AKAP8	0.263408	0.170412	EGDFSENDDAAGDFRSGDEEFKGEDELCDSG	1	0.201885	-0.165062	-0.0540627	-0.0279397	0.366947	-0.026123	S	2	1	3.56e-14	294.08	216.226	0.176153	0.073911
O43823	685	O43823	A-kinase anchor protein 8	AKAP8	0.951945	-0.93371	APAAADAEVEQTDAESKDAVPTE________	1	-0.933243	-0.165062	-1.12718	-0.0279397	-0.76818	-1.09924	S	2	0.972436	0.00113951	74.287	15.4752	1.22369	-1.03021
Q9ULX6;Q9ULX6-2;V9GZ50	326;265;292	Q9ULX6	A-kinase anchor protein 8-like	AKAP8L	0.86666	1.16612	EATEGLEGTEAVEKGSRVDGEDEEGKEDGRE	1	1.6837	0.264717	1.22756	0.31429	1.41898	0.913265	S	2	1	0.00940538	107.5	107.496	1.00462	1.45563
Q9ULX6;Q9ULX6-2;V9GZ50	283;222;249	Q9ULX6	A-kinase anchor protein 8-like	AKAP8L	0.406165	-0.056077	TADFRTKKKKRKQGGSPDEPDSKATRTDCSD	1	0.168899	0.264717	0.297954	0.31429	-0.0958179	-0.0163361	S	2	1	0.000643108	207.05	105.91	0.765235	0.233427
Q9ULX6;Q9ULX6-2	552;491	Q9ULX6	A-kinase anchor protein 8-like	AKAP8L	0.64896	-0.186168	KKLERYLKGENPFTDSPEEEKEQEEAEGGAL	1	0.0100636	0.264717	0.196607	0.31429	-0.254653	-0.117683	S	2	0.999987	0.000361067	181.72	48.8795	0.330272	0.103335
Q99996-2;Q99996-3;Q99996;Q99996-6;Q99996-5;H7BYL6	3690;3682;3694;3694;3640;1536	Q99996-2	A-kinase anchor protein 9	AKAP9	1.40329	1.61833	KLKAELRNDSLLQTLSPDSEHVTLKRIYGKY	1	1.70182	-0.0170813	1.47928	-0.0384804	1.7189	1.51776	S	2	0.998518	2.37e-05	191.4	28.595	1.35201	1.59055
B4DQP0;Q9H9L7-2;Q9H9L7	22;22;22	B4DQP0	Akirin-1	AKIRIN1	0	NaN	LKRPMEFEAALLSPGSPKRRRCAPLPGPTPG		-0.231938	NaN	NaN	NaN	NaN	NaN	S	2	0.996742	0.00851434	77.575	24.8557	0	-0.231938
Q53H80	21	Q53H80	Akirin-2	AKIRIN2	0	NaN	TLKRTLDFDPLLSPASPKRRRCAPLSAPTSA	1	0.728748	NaN	0.188528	NaN	NaN	NaN	S	2	0.997961	0.000395336	124.25	26.8965	0.470006	0.458638
P15121;E9PCX2	215;215	P15121	Aldose reductase	AKR1B1	0.00500874	-0.0193734	CQSKGIVVTAYSPLGSPDRPWAKPEDPSLLE	1	-1.18236	-0.0875188	1.00245	-0.0536434	-1.09484	1.05609	S	3	0.987222	0.00384745	44.848	20.2969	0.0233314	-0.0899549
B7Z5R1;P31749;G3V2I6	411;473;160	B7Z5R1	RAC-alpha serine/threonine-protein kinase	AKT1	0	NaN	MECVDSERRPHFPQFSYSASGTA________	2	NaN	0.0378742	NaN	-0.0623242	NaN	NaN	S	2	0.999513	0.000245555	161.31	33.3049	0	NaN
B7Z5R1;P31749;G3V2I6	415;477;164	B7Z5R1	RAC-alpha serine/threonine-protein kinase	AKT1	0	NaN	DSERRPHFPQFSYSASGTA____________	2	NaN	0.0378742	NaN	-0.0623242	NaN	NaN	S	2	0.989089	0.000245555	161.31	19.5729	0	NaN
B7Z5R1;P31749;G3V3K5	64;126;64	B7Z5R1	RAC-alpha serine/threonine-protein kinase	AKT1	0	NaN	KKQEEEEMDFRSGSPSDNSGAEEMEVSLAKP	3	NaN	0.0378742	NaN	-0.0623242	NaN	NaN	S	2	0.999483	0.000257203	77.469	32.1293	0	NaN
B7Z5R1;P31749;G3V3K5	67;129;67	B7Z5R1	RAC-alpha serine/threonine-protein kinase	AKT1	0	NaN	EEEEMDFRSGSPSDNSGAEEMEVSLAKPKHR	2;3	NaN	0.0378742	NaN	-0.0623242	NaN	NaN	S	2	0.999992	0.000257203	91.655	53.4461	0	NaN
B7Z5R1;P31749;G3V3K5	62;124;62	B7Z5R1	RAC-alpha serine/threonine-protein kinase	AKT1	0	0.396474	GLKKQEEEEMDFRSGSPSDNSGAEEMEVSLA	1;2;3	0.434348	0.0378742	NaN	-0.0623242	0.396474	NaN	S	2	0.955747	2.77e-05	163.74	13.7931	0	0.434348
B7Z5R1;P31749;G3V3X1;P31751;M0R0P9;J3QKW1;Q9Y243;Q9Y243-2	246;308;3;309;247;165;305;305	B7Z5R1;P31751;Q9Y243	RAC-alpha serine/threonine-protein kinase;RAC-beta serine/threonine-protein kinase;RAC-gamma serine/threonine-protein kinase	AKT1;AKT2;AKT3	1.15757	-0.568151	FGLCKEGIKDGATMKTFCGTPEYLAPEVLED;FGLCKEGISDGATMKTFCGTPEYLAPEVLED;FGLCKEGITDAATMKTFCGTPEYLAPEVLED	1	-0.592615	0.0378742	-0.601234	-0.0954196	-0.630489	-0.505814	T	2	0.999891	3.53e-08	193.77	39.6391	2.33761	-0.596924
Q96B36;Q96B36-3;H9KV91	92;112;92	Q96B36	Proline-rich AKT1 substrate 1	AKT1S1	0	NaN	PPAPPPAPQPPSPTPSPPRPTLAREDNEEDE	2	NaN	-0.0586532	NaN	-0.185606	NaN	NaN	S	3	0.997753	6.97e-34	273.71	29.3382	0	NaN
Q96B36;Q96B36-3;Q96B36-2	203;223;73	Q96B36	Proline-rich AKT1 substrate 1	AKT1S1	0	NaN	VPVWGFKEKRTEARSSDEENGPPSSPDLDRI	2	NaN	-0.0586532	NaN	-0.185606	NaN	NaN	S	2	0.584419	1.37e-05	212.05	1.48219	0	NaN
Q96B36;Q96B36-3;Q96B36-2	211;231;81	Q96B36	Proline-rich AKT1 substrate 1	AKT1S1	0	NaN	KRTEARSSDEENGPPSSPDLDRIAASMRALV	2	NaN	-0.0586532	NaN	-0.185606	NaN	NaN	S	2	0.538159	0.00222536	69.088	0.668244	0	NaN
Q96B36;Q96B36-3;Q96B36-2	212;232;82	Q96B36	Proline-rich AKT1 substrate 1	AKT1S1	0.359892	0.136159	RTEARSSDEENGPPSSPDLDRIAASMRALVL	1;2	-0.0339239	-0.0586532	0.0619835	-0.185606	0.0247293	0.247589	S	2	0.992335	3.13e-12	244.89	21.1217	0.0868214	0.0140298
Q96B36;Q96B36-3;Q96B36-2	246;266;116	Q96B36	Proline-rich AKT1 substrate 1	AKT1S1	0.247161	-0.0971718	EDTQVFGDLPRPRLNTSDFQKLKRKY_____	1	-0.275577	-0.0586532	-0.163026	-0.185606	-0.216923	0.0225799	T	2	0.999889	0.000325873	179.08	39.5436	0.796113	-0.219301
Q96B36;Q96B36-3;Q96B36-2	183;203;53	Q96B36	Proline-rich AKT1 substrate 1	AKT1S1	0.752567	-0.34922	SVPPASALPTQQYAKSLPVSVPVWGFKEKRT	1	-0.507419	-0.0586532	-0.43528	-0.185606	-0.448765	-0.249675	S	2	0.999995	0.00205344	121.18	53.0149	1.31317	-0.47135
Q96B36;Q96B36-3;H9KV91	88;108;88	Q96B36	Proline-rich AKT1 substrate 1	AKT1S1	0.693436	-1.00369	TAARPPAPPPAPQPPSPTPSPPRPTLAREDN	1;2	-1.39293	-0.0586532	-0.858698	-0.185606	-1.33428	-0.673092	S	3	0.99657	6.97e-34	273.71	23.2931	0.828842	-1.12582
Q96B36;Q96B36-3;H9KV91	90;110;90	Q96B36	Proline-rich AKT1 substrate 1	AKT1S1	0	-1.39744	ARPPAPPPAPQPPSPTPSPPRPTLAREDNEE	1	-1.45609	-0.0586532	NaN	-0.185606	-1.39744	NaN	T	3	0.49992	2.18e-10	176.96	0	0	-1.45609
P31751;Q0VAN0	474;431	P31751	RAC-beta serine/threonine-protein kinase	AKT2	0	NaN	LGLLELDQRTHFPQFSYSASIRE________	2	NaN	0.24987	NaN	-0.163769	NaN	NaN	S	3	0.996476	0.000251038	108.71	24.4601	0	NaN
P31751;Q0VAN0	478;435	P31751	RAC-beta serine/threonine-protein kinase	AKT2	0	NaN	ELDQRTHFPQFSYSASIRE____________	2	NaN	0.24987	NaN	-0.163769	NaN	NaN	S	3	0.984421	0.000251038	108.71	17.991	0	NaN
P31751;Q0VAN0;M0R0P9;M0R283	451;408;389;83	P31751	RAC-beta serine/threonine-protein kinase	AKT2	0.509052	-0.299521	TRYFDDEFTAQSITITPPDRYDSLGLLELDQ	1	-0.208061	0.24987	-0.304879	-0.163769	-0.457931	-0.14111	T	3	0.98465	5.24e-05	130.34	19.4322	0.925309	-0.25647
Q9Y243	472	Q9Y243	RAC-gamma serine/threonine-protein kinase	AKT3	0	NaN	MDCMDNERRPHFPQFSYSASGRE________	2	NaN	-0.0753984	NaN	-0.0954196	NaN	NaN	S	2	0.999249	0.0207329	187.01	30.9106	0	NaN
Q9Y243	476	Q9Y243	RAC-gamma serine/threonine-protein kinase	AKT3	0	NaN	DNERRPHFPQFSYSASGRE____________	2	NaN	-0.0753984	NaN	-0.0954196	NaN	NaN	S	2	0.927546	0.0207329	187.01	11.0692	0	NaN
Q9Y243;Q9Y243-2	120;120	Q9Y243	RAC-gamma serine/threonine-protein kinase	AKT3	0.498365	0.955537	VADRLQRQEEERMNCSPTSQIDNIGEEEMDA	1	0.359859	-0.0753984	1.3804	-0.0954196	0.435257	1.47582	S	3	0.985938	4.28e-06	134.66	19.4619	0.471531	0.870128
Q9Y243;Q9Y243-2	447;447	Q9Y243	RAC-gamma serine/threonine-protein kinase	AKT3	0.440888	0.111898	TRYFDEEFTAQTITITPPEKYDEDGMDCMDN	1	0.10809	-0.0753984	-0.0551116	-0.0954196	0.183488	0.040308	T	3	0.991458	0.000228307	139.51	20.9115	0.0968156	0.026489
P04075;P04075-2;J3KPS3;H3BR68	354;408;358;120	P04075	Fructose-bisphosphate aldolase A;Fructose-bisphosphate aldolase	ALDOA	0	NaN	CQGKYTPSGQAGAAASESLFVSNHAY_____	1	NaN	0.000144286	NaN	0.0429245	NaN	NaN	S	2	0.785425	0.00385143	65.741	5.79711	0	NaN
P04075;P04075-2;J3KPS3;H3BQN4;H3BPS8;H3BUH7;H3BR04;H3BMQ8	46;100;46;46;100;46;35;35	P04075	Fructose-bisphosphate aldolase A;Fructose-bisphosphate aldolase	ALDOA	1.46019	2.4455	LAADESTGSIAKRLQSIGTENTEENRRFYRQ	1	2.31237	0.000144286	2.62169	0.0429245	2.31223	2.57876	S	2	1	0.000250254	191.91	91.7969	1.39949	2.46703
P04075;P04075-2;J3KPS3;H3BQN4;H3BPS8;H3BUH7	39;93;39;39;93;39	P04075	Fructose-bisphosphate aldolase A;Fructose-bisphosphate aldolase	ALDOA	0.773868	0.902706	VAPGKGILAADESTGSIAKRLQSIGTENTEE	1	1.14724	0.000144286	0.701239	0.0429245	1.1471	0.658314	S	2	0.998673	3.79e-05	209.66	28.7784	0.821819	0.92424
P04075;P04075-2;J3KPS3;H3BQN4;H3BPS8;H3BUH7	36;90;36;36;90;36	P04075	Fructose-bisphosphate aldolase A;Fructose-bisphosphate aldolase	ALDOA	0.802963	0.12476	HRIVAPGKGILAADESTGSIAKRLQSIGTEN	1	0.156397	0.000144286	0.136191	0.0429245	0.156252	0.093267	S	2	0.754023	0.000740896	172.42	5.23868	1.3576	0.146294
P04075;P04075-2;J3KPS3;H3BQN4;H3BPS8;H3BUH7;H3BR04;H3BMQ8	9;63;9;9;63;9;9;9	P04075	Fructose-bisphosphate aldolase A;Fructose-bisphosphate aldolase	ALDOA	0.377881	0.0845463	_______MPYQYPALTPEQKKELSDIAHRIV	1	0.15004	0.000144286	0.0621218	0.0429245	0.149895	0.0191973	T	2	1	0.00184165	123.76	72.3234	0.601892	0.106081
P04075;P04075-2;H3BQN4;H3BPS8;P09972	176;230;176;230;176	P04075;P09972	Fructose-bisphosphate aldolase A;Fructose-bisphosphate aldolase;Fructose-bisphosphate aldolase C	ALDOA;ALDOC	0	2.47397	ALAILENANVLARYASICQQNGIVPIVEPEI;ALAIMENANVLARYASICQQNGIVPIVEPEI	1	2.48029	0.00632073	NaN	0.0243418	2.47397	NaN	S	3	0.999226	1.87e-05	86.771	31.1089	0	2.48029
Q9NP73;Q9NP73-3;Q9NP73-4;D6RD27	216;138;112;112	Q9NP73	Putative bifunctional UDP-N-acetylglucosamine transferase and deubiquitinase ALG13	ALG13	0	0.672322	LYKMHKGWKNYCSQKSLNEASMDEYLGSLGL	1	0.724738	0.0524158	NaN	0.00992034	0.672322	NaN	S	2	0.999885	0.0105077	64.318	39.525	0	0.724738
Q9NP73;Q9NP73-3;Q9NP73-4	830;752;726	Q9NP73	Putative bifunctional UDP-N-acetylglucosamine transferase and deubiquitinase ALG13	ALG13	0	-0.42229	STANLSLQDRKSCSMSPQDTVTSYNYPQKMM	1	-0.369874	0.0524158	NaN	0.00992034	-0.42229	NaN	S	2	0.964332	0.00381597	63.398	15.7496	0	-0.369874
H7C0X4;Q92685;F8WF93;H7BZZ2;F8WE30	12;13;13;11;13	H7C0X4	Dol-P-Man:Man(5)GlcNAc(2)-PP-Dol alpha-1,3-mannosyltransferase	ALG3	0	0.745487	____XAGLRKRGRSGSAAQAEGLCKQWLQRA	1	0.879314	0.133827	0.990084	NaN	0.745487	NaN	S	2	0.999825	0.000384049	204.23	37.5795	1.42391	0.934699
H7C0X4;Q92685;F8WF93;H7BZZ2;F8WE30	10;11;11;9;11	H7C0X4	Dol-P-Man:Man(5)GlcNAc(2)-PP-Dol alpha-1,3-mannosyltransferase	ALG3	0	-0.0088368	______XAGLRKRGRSGSAAQAEGLCKQWLQ	1	0.12499	0.133827	0.564329	NaN	-0.0088368	NaN	S	2	0.998845	0.000365525	199.33	29.3696	0.442205	0.34466
Q6P6C2;Q6P6C2-3;Q6P6C2-1	69;58;69	Q6P6C2	RNA demethylase ALKBH5	ALKBH5	0	NaN	SGAKRKYQEDSDPERSDYEEQQLQKEEEARK	2	NaN	-0.0446128	NaN	-0.0362891	NaN	NaN	S	2	1	7.67e-29	327.61	92.7933	0	NaN
Q6P6C2;Q6P6C2-3;K7ER58	375;364;34	Q6P6C2	RNA demethylase ALKBH5	ALKBH5	0	NaN	GSFSSENYWRKSYESSEDCSEAAGSPARKVK		NaN	-0.0446128	NaN	-0.0362891	NaN	NaN	S	2	0.499458	0.00222979	71.148	0	0	NaN
Q6P6C2;Q6P6C2-3;Q6P6C2-1	96;85;96	Q6P6C2	RNA demethylase ALKBH5	ALKBH5	0.882793	3.25312	EARKVKSGIRQMRLFSQDECAKIEARIDEVV	1	3.88743	-0.0446128	2.53792	-0.0362891	3.93204	2.57421	S	2	1	0.00392101	109.15	67.0795	0.880107	3.21267
Q6P6C2;Q6P6C2-3;Q6P6C2-1	252;241;252	Q6P6C2	RNA demethylase ALKBH5	ALKBH5	0	1.60792	IRVSEPVLSLPVRRGSVTVLSGYAADEITHC	1	NaN	-0.0446128	1.57163	-0.0362891	NaN	1.60792	S	4	0.781704	1e-07	159.25	5.53996	0	1.57163
Q6P6C2;Q6P6C2-3;K7ER58	371;360;30	Q6P6C2	RNA demethylase ALKBH5	ALKBH5	0.651229	0.62851	HRRRGSFSSENYWRKSYESSEDCSEAAGSPA	1	0.354001	-0.0446128	0.822118	-0.0362891	0.398614	0.858407	S	2	0.999734	7.88e-05	132.52	36.0613	0.617713	0.58806
Q6P6C2;Q6P6C2-3;Q6P6C2-1;K7ER58	361;350;361;20	Q6P6C2	RNA demethylase ALKBH5	ALKBH5	2.03086	0.582406	ENRRSVLLPTHRRRGSFSSENYWRKSYESSE	1	0.529271	-0.0446128	0.554638	-0.0362891	0.573884	0.590927	S	2	0.998968	0.00138395	182.72	29.9532	1.82693	0.541955
Q6P6C2;Q6P6C2-3;K7ER58	374;363;33	Q6P6C2	RNA demethylase ALKBH5	ALKBH5	0.933473	0.458914	RGSFSSENYWRKSYESSEDCSEAAGSPARKV	1	0.499272	-0.0446128	0.337654	-0.0362891	0.543885	0.373943	S	2	0.98061	2.39e-09	252.58	17.0393	0.915631	0.418463
Q6P6C2;Q6P6C2-3;Q6P6C2-1	64;53;64	Q6P6C2	RNA demethylase ALKBH5	ALKBH5	0.110122	0.0181283	EPYPVSGAKRKYQEDSDPERSDYEEQQLQKE	1;2	0.0229004	-0.0446128	-0.0675457	-0.0362891	0.0675132	-0.0312566	S	2	1	7.67e-29	327.61	127.527	0.149909	-0.0223226
Q6P6C2;Q6P6C2-3;K7ER58	384;373;43	Q6P6C2	RNA demethylase ALKBH5	ALKBH5	0.621584	-0.100861	RKSYESSEDCSEAAGSPARKVKMRRH_____	1	-0.105722	-0.0446128	-0.176903	-0.0362891	-0.0611088	-0.140614	S	2	1	1.64e-23	332.22	100.718	0.803904	-0.141312
P05186-3;P05186	55;110	P05186-3	Alkaline phosphatase, tissue-nonspecific isozyme	ALPL	0	NaN	VALSKTYNTNAQVPDSAGTATAYLCGVKANE	1	0.466027	NaN	0.429107	NaN	NaN	NaN	S	3	0.716966	0.000479338	57.902	4.69232	1.581	0.447567
Q96Q42;Q96Q42-3	483;483	Q96Q42	Alsin	ALS2	0	NaN	VDIREEETEGGSRRLSLPGLLSQVSPRLLRK	2	NaN	NaN	NaN	NaN	NaN	NaN	S	2	1	0.000640498	98.002	63.8537	0	NaN
Q96Q42;Q96Q42-3	492;492	Q96Q42	Alsin	ALS2	0	NaN	GGSRRLSLPGLLSQVSPRLLRKAARVKTRTV	1;2	-0.0489494	NaN	0.0666747	NaN	NaN	NaN	S	2	0.995837	0.000640498	153.75	23.7877	0.0442357	0.00886267
Q96Q42	1462	Q96Q42	Alsin	ALS2	0	NaN	PTERKSFCTGKSDSRSESPEPGYVVTSSGLL	1	-0.185819	NaN	NaN	NaN	NaN	NaN	S	2	0.54096	1.01e-06	150.36	0.713153	0	-0.185819
Q96Q42	1464	Q96Q42	Alsin	ALS2	0	NaN	ERKSFCTGKSDSRSESPEPGYVVTSSGLLLP	1	-0.277744	NaN	-0.185999	NaN	NaN	NaN	S	3	0.832005	1.01e-06	150.36	6.94832	0.905389	-0.231872
Q96Q42;Q96Q42-3	466;466	Q96Q42	Alsin	ALS2	0	NaN	EEQVKQESMQGKKSSSLVDIREEETEGGSRR	1	0.383497	NaN	-0.0470701	NaN	NaN	NaN	S	2	0.760623	0.0608047	49.768	8.07339	0.238261	0.168213
Q9H161	200	Q9H161	Homeobox protein aristaless-like 4	ALX4	0	NaN	AGVKGPQDRASSDLPSPLEKADSESNKGKKR	1	1.07478	NaN	0.969454	NaN	NaN	NaN	S	2	1	0.00304259	153.09	88.7766	1.4845	1.02212
Q9H161	131	Q9H161	Homeobox protein aristaless-like 4	ALX4	0	NaN	PPAQPHLYLQRGACKTPPDGSLKLQEGSSGH	1	-0.102868	NaN	NaN	NaN	NaN	NaN	T	2	0.999973	0.0211578	97.214	45.7476	0	-0.102868
E9PB61;Q86V81	246;239	E9PB61;Q86V81	THO complex subunit 4	ALYREF	1.26959	0.207087	RGRGRGAGRNSKQQLSAEELDAQLDAYNARM	1	0.223917	0.0343565	0.265437	0.0408223	0.18956	0.224615	S	2	1	3.86e-05	142.85	94.3606	1.26852	0.244677
Q9C0C7-2;Q9C0C7-3;Q9C0C7;Q9C0C7-4;Q9C0C7-5;Q9C0C7-6	639;639;639;549;549;549	Q9C0C7-2	Activating molecule in BECN1-regulated autophagy protein 1	AMBRA1	0	NaN	GQTPSSSRLELSSSASPQEERTVGVAFNQET	1	1.33845	NaN	0.95017	NaN	NaN	NaN	S	2	0.995572	0.000856987	137.81	23.8015	0.970661	1.14431
Q9C0C7-2;Q9C0C7-3;Q9C0C7;Q9C0C7-4;Q9C0C7-5;H0YE34	1145;1176;1205;1115;1208;163	Q9C0C7-2	Activating molecule in BECN1-regulated autophagy protein 1	AMBRA1	0	NaN	RSSQTGTEPGAAHTSSPQPSTSRGLLPEAGQ	1	0.349931	NaN	NaN	NaN	NaN	NaN	S	3	0.627773	4.74e-05	90.166	5.28818	0	0.349931
Q5JTC6	867	Q5JTC6	APC membrane recruitment protein 1	AMER1	0	NaN	NNYHSRFYQGLPWGVSSLPRYLGLPGLHPRP	1	-0.498179	NaN	-0.934676	NaN	NaN	NaN	S	2	0.5	0.00464749	66.022	0	0.725264	-0.716427
Q5JTC6	868	Q5JTC6	APC membrane recruitment protein 1	AMER1	0	NaN	NYHSRFYQGLPWGVSSLPRYLGLPGLHPRPP	1	-0.498179	NaN	-0.934676	NaN	NaN	NaN	S	2	0.5	0.00464749	66.022	0	0.725264	-0.716427
Q5JTC6;Q5JTC6-2	286;286	Q5JTC6	APC membrane recruitment protein 1	AMER1	0	NaN	QPKPAPEASSLEEPHSPETGEKVVAGEVNPP	1	0.142087	NaN	-0.147937	NaN	NaN	NaN	S	2	0.994551	1.05e-07	209.3	22.6133	0.00561269	-0.00292527
Q5JTC6;Q5JTC6-2	246;246	Q5JTC6	APC membrane recruitment protein 1	AMER1	0	NaN	PQDAPGPKVSPTPEPSPPATEKMACKDPEKP	2	NaN	NaN	NaN	NaN	NaN	NaN	S	2	0.984749	0.0146575	60.542	18.2955	0	NaN
Q5JTC6;Q5JTC6-2	318;318	Q5JTC6	APC membrane recruitment protein 1	AMER1	0	NaN	GPVGDPLSLLFGDVTSLKSFDSLTGCGDIIA	1	NaN	NaN	-0.674153	NaN	NaN	NaN	S	3	0.745987	0.000134102	70.71	4.67893	0	-0.674153
Q5JTC6;Q5JTC6-2	242;242	Q5JTC6	APC membrane recruitment protein 1	AMER1	0	NaN	ENANPQDAPGPKVSPTPEPSPPATEKMACKD	2	NaN	NaN	NaN	NaN	NaN	NaN	T	2	0.974239	0.0146575	60.542	15.8934	0	NaN
Q9UKV5;R4GNG2;H3BRK9	523;179;270	Q9UKV5	E3 ubiquitin-protein ligase AMFR	AMFR	0	NaN	DSIRPALNSPVERPSSDQEEGETSAQTERVP	1	-0.51614	NaN	NaN	NaN	NaN	NaN	S	4	0.806434	7.31e-14	190.85	7.67143	0	-0.51614
Q9UKV5;R4GNG2	542;198	Q9UKV5	E3 ubiquitin-protein ligase AMFR	AMFR	0	NaN	EGETSAQTERVPLDLSPRLEETLDFGEVEVE	1	1.76558	NaN	NaN	NaN	NaN	NaN	S	2	1	0.015084	73.435	73.4351	0	1.76558
Q9Y4X0;Q9Y4X0-2;Q9Y4X0-3	16;16;16	Q9Y4X0	AMME syndrome candidate gene 1 protein	AMMECR1	0	NaN	MAAGCCGVKKQKLSSSPPSGSGGGGGASSSS	1	-0.442614	NaN	-0.337521	NaN	NaN	NaN	S	3	0.887551	2.75e-05	113.39	8.99545	1.06932	-0.390068
Q6DCA0	74	Q6DCA0	AMMECR1-like protein	AMMECR1L	0	NaN	SGRENVSDLTLGPGNSPITRMNPASGALSPL	1	1.46043	NaN	0.797262	NaN	NaN	NaN	S	2	0.960823	3.74e-05	171.08	13.9612	0.740209	1.12885
Q4VCS5;E7ERM3;Q4VCS5-2;A6NP16	718;486;309;486	Q4VCS5	Angiomotin	AMOT	0	NaN	AAQRDTTVISHSPNTSYDTALEARIQKEEEE	2	NaN	0.260026	NaN	0.390558	NaN	NaN	S	3	0.989259	2.91e-06	165.77	20.575	0	NaN
Q4VCS5;E7ERM3;A6NP16	312;80;80	Q4VCS5	Angiomotin	AMOT	0	NaN	SLPLSARNSQPHSPTSSLTSGGSLPLLQSPP		NaN	0.260026	NaN	0.390558	NaN	NaN	S	4	0.218703	0.00473838	41.047	0	0	NaN
Q4VCS5;E7ERM3;A6NP16	313;81;81	Q4VCS5	Angiomotin	AMOT	0	NaN	LPLSARNSQPHSPTSSLTSGGSLPLLQSPPS		NaN	0.260026	NaN	0.390558	NaN	NaN	S	3	0.264453	0.00122001	55.084	0.402738	0	NaN
Q4VCS5;E7ERM3;A6NP16	325;93;93	Q4VCS5	Angiomotin	AMOT	0	NaN	PTSSLTSGGSLPLLQSPPSTRLSPARHPLVP	2	NaN	0.260026	NaN	0.390558	NaN	NaN	S	3	0.766106	0.00122001	55.084	6.83627	0	NaN
Q4VCS5;E7ERM3;A6NP16	328;96;96	Q4VCS5	Angiomotin	AMOT	0	NaN	SLTSGGSLPLLQSPPSTRLSPARHPLVPNQG		NaN	0.260026	NaN	0.390558	NaN	NaN	S	4	0.423094	4.78e-06	130.02	0.602004	0	NaN
Q4VCS5;E7ERM3;Q4VCS5-2	840;608;431	Q4VCS5	Angiomotin	AMOT	0	NaN	GILLGGDYRAEYVPSTPSPVPPSTPLLSAHS	2	NaN	0.260026	NaN	0.390558	NaN	NaN	T	3	0.801677	0.00016899	70.145	5.98466	0	NaN
Q4VCS5;E7ERM3;Q4VCS5-2	859;627;450	Q4VCS5	Angiomotin	AMOT	0	0.615047	VPPSTPLLSAHSKTGSRDCSTQTERGTESNK	1	0.875072	0.260026	NaN	0.390558	0.615047	NaN	S	2	0.99791	0.00436785	175.26	27.5066	0	0.875072
Q4VCS5;E7ERM3;Q4VCS5-2;A6NP16	714;482;305;482	Q4VCS5	Angiomotin	AMOT	0.955612	0.321259	AATVAAQRDTTVISHSPNTSYDTALEARIQK	1;2	0.637749	0.260026	0.655352	0.390558	0.377724	0.264794	S	3	1	2.85e-43	363.14	68.3558	2.0622	0.646551
Q4VCS5;E7ERM3;Q4VCS5-2;A6NP16	808;576;399;576	Q4VCS5	Angiomotin	AMOT	0.701079	0.257202	NAGSGLLSHSSTLTGSPIMEEKRDDKSWKGS	1	0.600365	0.260026	0.564622	0.390558	0.340339	0.174064	S	3	0.981244	4.37e-32	285.29	17.2827	1.70939	0.582494
Q4VCS5	229	Q4VCS5	Angiomotin	AMOT	0.272235	0.19077	SSEFYKAQGPLPNQHSLKGMEHRGPPPEYPF	1	0.663299	0.260026	0.368824	0.390558	0.403273	-0.0217333	S	2	1	0.0079206	69.379	69.3792	0.752191	0.516062
Q4VCS5;E7ERM3;Q4VCS5-2	1061;829;652	Q4VCS5	Angiomotin	AMOT	0.0382165	-0.0300018	TCNPDKTDGPVFHSNTLERKTPIQILGQEPD	1	0.455439	0.260026	0.135141	0.390558	0.195413	-0.255417	T	2	0.995323	0.000200421	218.85	23.2801	0.499809	0.29529
Q4VCS5;E7ERM3;Q4VCS5-2	848;616;439	Q4VCS5	Angiomotin	AMOT	0	-0.0359854	RAEYVPSTPSPVPPSTPLLSAHSKTGSRDCS	1	0.22404	0.260026	NaN	0.390558	-0.0359854	NaN	T	3	0.554115	0.00070726	54.097	2.51984	0	0.22404
Q4VCS5	200	Q4VCS5	Angiomotin	AMOT	0.765273	-0.125051	TSGVKAHPPVTSAPLSPPQPNDLYKNPTSSS	1	0.16954	0.260026	0.230941	0.390558	-0.0904855	-0.159617	S	2	1	4.38e-08	202.46	73.1711	1.0139	0.20024
Q4VCS5;E7ERM3;Q4VCS5-2;A6NP16	787;555;378;555	Q4VCS5	Angiomotin	AMOT	0.544681	-0.341528	EPSKTEQLSCMRPAKSLMSISNAGSGLLSHS	1	0.0827026	0.260026	-0.115176	0.390558	-0.177323	-0.505733	S	3	0.999667	2.35e-11	178.88	34.7806	0.0474739	-0.0162365
Q4VCS5;E7ERM3;Q4VCS5-2	823;591;414	Q4VCS5	Angiomotin	AMOT	1.61252	-0.368372	SPIMEEKRDDKSWKGSLGILLGGDYRAEYVP	1	-0.0942179	0.260026	0.00805652	0.390558	-0.354243	-0.382501	S	2	0.999997	0.0206575	55.755	55.2595	0.256251	-0.0430807
Q4VCS5;E7ERM3;Q4VCS5-2	842;610;433	Q4VCS5	Angiomotin	AMOT	0	-0.37858	LLGGDYRAEYVPSTPSPVPPSTPLLSAHSKT	1;2	-0.118555	0.260026	NaN	0.390558	-0.37858	NaN	S	3	0.981448	0.00016899	70.145	16.4653	0	-0.118555
Q4VCS5;E7ERM3;A6NP16	309;77;77	Q4VCS5	Angiomotin	AMOT	0	-0.622518	QDISLPLSARNSQPHSPTSSLTSGGSLPLLQ	1;2	-0.362492	0.260026	NaN	0.390558	-0.622517	NaN	S	2	0.949341	1.5e-13	196.09	13.0309	0	-0.362492
Q4VCS5;E7ERM3;A6NP16	311;79;79	Q4VCS5	Angiomotin	AMOT	1.98297	-0.689211	ISLPLSARNSQPHSPTSSLTSGGSLPLLQSP	1	-0.417926	0.260026	-0.309914	0.390558	-0.677952	-0.700471	T	3	0.517404	9.79e-09	161.2	2.07651	1.02784	-0.36392
Q8IY63-2;Q8IY63	759;809	Q8IY63-2	Angiomotin-like protein 1	AMOTL1	0	NaN	VPSIAAATGTHSRQTSLTSSQLAEEKKEEKT	1	0.45607	NaN	NaN	0.335255	NaN	NaN	S	2	0.972656	0.0177073	64.537	15.9143	0	0.45607
Q8IY63-2;Q8IY63	753;803	Q8IY63-2	Angiomotin-like protein 1	AMOTL1	0	NaN	LRPARSVPSIAAATGTHSRQTSLTSSQLAEE	1	-0.226223	NaN	NaN	0.335255	NaN	NaN	T	2	0.658525	0.00165951	93.371	3.51209	0	-0.226223
Q8IY63-2;Q8IY63	670;720	Q8IY63-2	Angiomotin-like protein 1	AMOTL1	0	-0.0102137	AATAAAERDTTIINHSRNGSYGESSLEAHIW	1	0.171591	NaN	0.325041	0.335255	NaN	-0.0102137	S	2	0.999987	0.00317245	133.32	48.8138	0.719468	0.248316
Q8IY63-2;Q8IY63	743;793	Q8IY63-2	Angiomotin-like protein 1	AMOTL1	0	-0.343414	KDAGKTDSSSLRPARSVPSIAAATGTHSRQT	1	-0.117599	NaN	-0.00815979	0.335255	NaN	-0.343414	S	2	0.999948	0.00103318	136.35	42.8515	0.341132	-0.0628796
Q9Y2J4;Q9Y2J4-2;Q9Y2J4-4;Q9Y2J4-3	759;760;817;757	Q9Y2J4	Angiomotin-like protein 2	AMOTL2	0	NaN	EPDSLLGCSSSQRAASLDSVATSRVQDLSDM	2	NaN	NaN	NaN	NaN	NaN	NaN	S	2	1	0.000576857	111.78	85.4845	0	NaN
Q9Y2J4;Q9Y2J4-2;Q9Y2J4-4;Q9Y2J4-3	762;763;820;760	Q9Y2J4	Angiomotin-like protein 2	AMOTL2	0	NaN	SLLGCSSSQRAASLDSVATSRVQDLSDMVEI	2	NaN	NaN	NaN	NaN	NaN	NaN	S	2	0.997885	0.000576857	111.78	27.3663	0	NaN
Q9Y2J4;Q9Y2J4-2;Q9Y2J4-4;Q9Y2J4-3;D6RCL7	183;183;241;183;183	Q9Y2J4	Angiomotin-like protein 2	AMOTL2	0	NaN	ERNGARAPSHMSSSHSFPQLARNQQGPPLRG	1	0.683831	NaN	1.60767	NaN	NaN	NaN	S	3	0.998839	3.99e-06	213.5	30.2136	0.612663	1.14575
Q9Y2J4;Q9Y2J4-2;Q9Y2J4-4;Q9Y2J4-3;D6RCL7;D6RIC7;D6RBK2;D6RJA4;D6RF61	50;50;108;50;50;50;50;50;50	Q9Y2J4	Angiomotin-like protein 2	AMOTL2	0	NaN	QQQALRGGAGTGGTGSPQASLEILAPEDSQV		NaN	NaN	NaN	NaN	NaN	NaN	S	3	0.314322	0.000475305	58.565	0	0	NaN
Q9Y2J4;Q9Y2J4-2;Q9Y2J4-4;Q9Y2J4-3	540;540;598;538	Q9Y2J4	Angiomotin-like protein 2	AMOTL2	0	NaN	QRQAGAPGGSSGSGGSPELSALRLSEQLREK	1	1.63789	NaN	NaN	NaN	NaN	NaN	S	2	0.969747	0.000410716	93.179	16.6283	0	1.63789
Q9Y2J4;Q9Y2J4-2;Q9Y2J4-4;Q9Y2J4-3;D6RCL7;D6RIC7;D6RBK2;D6RJA4;D6RF61	45;45;103;45;45;45;45;45;45	Q9Y2J4	Angiomotin-like protein 2	AMOTL2	0	NaN	TLLAIQQQALRGGAGTGGTGSPQASLEILAP		NaN	NaN	NaN	NaN	NaN	NaN	T	3	0.314322	0.000475305	58.565	0	0	NaN
Q9Y2J4;Q9Y2J4-2;Q9Y2J4-4;Q9Y2J4-3;D6RCL7;D6RIC7;D6RBK2;D6RJA4;D6RF61	48;48;106;48;48;48;48;48;48	Q9Y2J4	Angiomotin-like protein 2	AMOTL2	0	NaN	AIQQQALRGGAGTGGTGSPQASLEILAPEDS		NaN	NaN	NaN	NaN	NaN	NaN	T	3	0.314322	0.000475305	58.565	0	0	NaN
H0Y360;Q01433-2;Q01433;Q01433-3;Q01433-5;Q01433-4;H0YCL9;E9PJF6;E9PIJ1	139;87;168;49;50;93;135;87;50	H0Y360	AMP deaminase 2	AMPD2	1.03872	0.747834	IEQLEERRQRLERQISQDVKLEPDILLRAKQ	1	0.753005	-0.103023	0.502738	-0.136902	0.856028	0.63964	S	3	1	0.000221052	154.31	59.3721	0.90227	0.627872
H0Y360;Q01433-2;Q01433;Q01433-3;Q01433-5;Q01433-4;H0YCL9;E9PIJ1	161;109;190;71;72;115;157;72	H0Y360	AMP deaminase 2	AMPD2	0.31362	0.21143	PDILLRAKQDFLKTDSDSDLQLYKEQGEGQG	1	-0.0937405	-0.103023	0.276675	-0.136902	0.00928248	0.413577	S	2	0.999572	0.00209047	164.92	35.1579	0.149988	0.0914674
H0Y360;Q01433-2;Q01433;H0YCL9;E9PJF6	71;19;100;67;19	H0Y360	AMP deaminase 2	AMPD2	0.107981	-0.146964	EARGGLGAPPLQSARSLPGPAPCLKHFPLDL	1	0.157949	-0.103023	-0.691802	-0.136902	0.260972	-0.5549	S	2	1	0.0137908	71.176	49.4481	0.191856	-0.266927
Q9H1A4	362	Q9H1A4	Anaphase-promoting complex subunit 1	ANAPC1	0	NaN	MAALSRAHSPALGVHSFSGVQRFNISSHNQS	2	NaN	-0.325413	NaN	-0.193998	NaN	NaN	S	3	0.997234	5.91e-05	183.1	25.5699	0	NaN
Q9H1A4;H0Y564	563;98	Q9H1A4	Anaphase-promoting complex subunit 1	ANAPC1	0	NaN	LDEVVLLSPVPELRDSSKLHDSLYNEDCTFQ		NaN	-0.325413	NaN	-0.193998	NaN	NaN	S	3	0.499818	0.00021999	64.27	0	0	NaN
Q9H1A4;H0Y564	686;221	Q9H1A4	Anaphase-promoting complex subunit 1	ANAPC1	0	NaN	NTDRLAWTRNFDFEGSLSPVIAPKKARPSET	2	NaN	-0.325413	NaN	-0.193998	NaN	NaN	S	2	1	0.000962839	105.79	105.786	0	NaN
Q9H1A4;F8WAS1	50;50	Q9H1A4	Anaphase-promoting complex subunit 1	ANAPC1	0	NaN	LNLQLRQLQPASELWSSDGAAGLVGSLQEVT		NaN	-0.325413	NaN	-0.193998	NaN	NaN	S	3	0.483769	4.15e-05	95.652	0	0	NaN
Q9H1A4;F8WAS1	51;51	Q9H1A4	Anaphase-promoting complex subunit 1	ANAPC1	0	NaN	NLQLRQLQPASELWSSDGAAGLVGSLQEVTI		NaN	-0.325413	NaN	-0.193998	NaN	NaN	S	3	0.483769	4.15e-05	95.652	0	0	NaN
Q9H1A4;H0Y564	688;223	Q9H1A4	Anaphase-promoting complex subunit 1	ANAPC1	1.46106	1.20887	DRLAWTRNFDFEGSLSPVIAPKKARPSETGS	1;2	0.949199	-0.325413	0.949124	-0.193998	1.27461	1.14312	S	2	1	0.000495806	178.72	105.786	4.60091	0.949161
Q9H1A4	343	Q9H1A4	Anaphase-promoting complex subunit 1	ANAPC1	0.552452	1.0441	QSRSTSSPSLHSRSPSISNMAALSRAHSPAL	1	1.21051	-0.325413	0.358284	-0.193998	1.53593	0.552281	S	2	0.99989	0.00289933	101.42	42.6069	0.499208	0.784399
Q9H1A4;H0Y564	731;266	Q9H1A4	Anaphase-promoting complex subunit 1	ANAPC1	1.63585	0.948487	HQNVESHLLNRSLCLSPSEASQMKDEDFSQN	1	0.657548	-0.325413	0.720016	-0.193998	0.982961	0.914013	S	2	0.998182	0.000176945	176.29	27.4902	1.53988	0.688782
Q9H1A4;H0Y564	530;65	Q9H1A4	Anaphase-promoting complex subunit 1	ANAPC1	0	0.516344	PAPSLTMSNTMPRPSTPLDGVSTPKPLSKLL	1	0.190931	-0.325413	NaN	-0.193998	0.516344	NaN	T	2	0.996255	0.00623897	89.624	24.2494	0	0.190931
Q9H1A4	377	Q9H1A4	Anaphase-promoting complex subunit 1	ANAPC1	2.33227	0.509457	SFSGVQRFNISSHNQSPKRHSISHSPNSNSN	1	0.187768	-0.325413	0.311736	-0.193998	0.513181	0.505733	S	2	1	7.1e-35	297.51	85.4244	0.810037	0.249752
Q9H1A4	355	Q9H1A4	Anaphase-promoting complex subunit 1	ANAPC1	0.790409	0.494637	RSPSISNMAALSRAHSPALGVHSFSGVQRFN	1;2	0.0405417	-0.325413	0.429321	-0.193998	0.365955	0.623319	S	3	1	6.59e-06	206.21	101.546	0.356488	0.234932
Q9H1A4;H0Y564	564;99	Q9H1A4	Anaphase-promoting complex subunit 1	ANAPC1	0	0.408115	DEVVLLSPVPELRDSSKLHDSLYNEDCTFQQ	1	0.0827026	-0.325413	NaN	-0.193998	0.408115	NaN	S	3	0.59518	2.45e-05	118.05	1.67388	0	0.0827026
Q9UJX6-2;Q9UJX6	314;314	Q9UJX6-2	Anaphase-promoting complex subunit 2	ANAPC2	1.23693	0.43623	WLGKVFLQDGPARPASPEAGNTLRRWRCHVQ	1	0.340164	-0.135887	0.298306	-0.098104	0.476051	0.39641	S	2	1	0.00473424	99.161	66.6677	1.38011	0.319235
Q9UJX6-2;Q9UJX6	218;218	Q9UJX6-2	Anaphase-promoting complex subunit 2	ANAPC2	0	0.197736	LDSRYARRRYYRLLQSPLCAGCSSDKQQCWC	1	NaN	-0.135887	0.0996318	-0.098104	NaN	0.197736	S	2	0.999994	0.00194217	88.565	53.6368	0	0.0996318
Q9UJX6-2;Q9UJX6	729;732	Q9UJX6-2	Anaphase-promoting complex subunit 2	ANAPC2	0	0.107308	EEERPQDRDNMVLIDSDDESDSGMASQADQK	1	NaN	-0.135887	0.00920381	-0.098104	NaN	0.107308	S	2	0.768781	0.000958618	63.376	5.57399	0	0.00920381
Q9UJX6-2;Q9UJX6	467;470	Q9UJX6-2	Anaphase-promoting complex subunit 2	ANAPC2	0	-0.577799	ELSKTDPASLETGQDSEDDSGEPEDWVPDPV	1	-0.713687	-0.135887	NaN	-0.098104	-0.577799	NaN	S	3	0.843841	0.000108708	76.006	8.93417	0	-0.713687
Q9UJX5;E9PCR4	777;778	Q9UJX5	Anaphase-promoting complex subunit 4	ANAPC4	0.991004	0.177155	EEASNKPVKIKEEVLSESEAENQQAGAAALA	1	-0.0884849	-0.294296	-0.086492	-0.234991	0.205812	0.1485	S	3	0.932419	1.63e-14	197.63	11.3979	2.13965	-0.0874884
Q9UJX4;F5H0F9;Q9UJX4-3;F5GY68;Q9UJX4-2	195;195;96;96;74	Q9UJX4	Anaphase-promoting complex subunit 5	ANAPC5	0.661871	0.366917	RDEGERKMEKEELDVSVREEEVSCSGPLSQK	1	0.576764	0.0791561	0.275365	0.0391384	0.497608	0.236226	S	2	0.999994	0.000908185	104.6	52.6313	0.664681	0.426064
I6L894;Q01484-5;Q01484-2;Q01484;E9PCH6;H0Y931;Q01484-7;H0Y8Y2	3800;1739;1748;3833;924;750;400;843	I6L894	Ankyrin-2	ANK2	0	NaN	SERGGSPIIQEPEEPSEHREESSPRKTSLVI		NaN	-0.313352	NaN	0.196103	NaN	NaN	S	3	0.424405	0.00133942	68.461	1.40622	0	NaN
I6L894;Q01484-5;Q01484-2;Q01484;E9PCH6;H0Y931;Q01484-7;H0Y8Y2	3806;1745;1754;3839;930;756;406;849	I6L894	Ankyrin-2	ANK2	0	NaN	PIIQEPEEPSEHREESSPRKTSLVIVESADN		NaN	-0.313352	NaN	0.196103	NaN	NaN	S	3	0.428508	9.67e-07	154.71	0	0	NaN
I6L894;Q01484-5;Q01484-2;Q01484;E9PCH6;H0Y931;Q01484-7;H0Y8Y2	3807;1746;1755;3840;931;757;407;850	I6L894	Ankyrin-2	ANK2	0	NaN	IIQEPEEPSEHREESSPRKTSLVIVESADNQ		NaN	-0.313352	NaN	0.196103	NaN	NaN	S	3	0.428508	9.67e-07	154.71	0	0	NaN
I6L894;Q01484-5;Q01484-2;Q01484;E9PCH6;H0Y931;Q01484-7;H0Y8Y2	3876;1815;1824;3909;1000;857;507;919	I6L894	Ankyrin-2	ANK2	0	0.815682	TVVKKVTRKIIRRYVSSEGTEKEEIMVQGMP	1	0.502331	-0.313352	NaN	0.196103	0.815682	NaN	S	2	0.993111	0.00272784	105.94	21.6338	0	0.502331
I6L894;Q01484-5;Q01484-2;Q01484;E9PCH6;H0Y931;Q01484-7;H0Y8Y2	3770;1709;1718;3803;894;720;370;813	I6L894	Ankyrin-2	ANK2	0.661557	0.653918	MIVPSSPSKTPEEVSTPAEEEKLYLQTPTSS	1	0.573665	-0.313352	0.616922	0.196103	0.887017	0.420819	T	2	0.951168	0.000152065	228.9	12.8956	1.63602	0.595294
I6L894;Q01484-5;Q01484-2;Q01484;E9PCH6;H0Y931;Q01484-7;H0Y8Y2	3769;1708;1717;3802;893;719;369;812	I6L894	Ankyrin-2	ANK2	0	0.420819	AMIVPSSPSKTPEEVSTPAEEEKLYLQTPTS	1	NaN	-0.313352	0.616922	0.196103	NaN	0.420819	S	2	0.499996	0.00875922	61.532	0	0	0.616922
I6L894;Q01484-5;Q01484-2;Q01484;E9PCH6;H0Y931;Q01484-7;H0Y8Y2	3760;1699;1708;3793;884;710;360;803	I6L894	Ankyrin-2	ANK2	0	0.370351	GTETSETQKAMIVPSSPSKTPEEVSTPAEEE	1	0.0569996	-0.313352	NaN	0.196103	0.370351	NaN	S	2	0.896704	0.000814613	132.14	9.6839	0	0.0569996
I6L894;Q01484-5;Q01484-2;Q01484;E9PCH6;Q01484-7;D6RHE1;E9PHW9;H0YAG3	1426;1450;1459;1459;635;111;1372;1474;112	I6L894	Ankyrin-2	ANK2	0.480088	0.314862	AICNLNITLPIYTKESESDQEQEEEIDMTSE	1	0.181802	-0.313352	0.330673	0.196103	0.495154	0.13457	S	2	0.5737	8.5e-06	192.94	1.28969	0.744775	0.256238
I6L894;Q01484-5;Q01484-2;Q01484;E9PCH6;H0Y931;Q01484-7;H0Y8Y2	3812;1751;1760;3845;936;762;412;855	I6L894	Ankyrin-2	ANK2	0	-0.430552	EEPSEHREESSPRKTSLVIVESADNQPETCE	1	NaN	-0.313352	-0.234448	0.196103	NaN	-0.430552	S	2	0.793718	0.00144511	79.426	5.85205	0	-0.234448
I6L894;Q01484-5;Q01484-2;Q01484;E9PCH6;H0Y931;Q01484-7;H0Y8Y2	3790;1729;1738;3823;914;740;390;833	I6L894	Ankyrin-2	ANK2	0.597351	-0.61184	EKLYLQTPTSSERGGSPIIQEPEEPSEHREE	1;2	-0.668685	-0.313352	-0.672244	0.196103	-0.355333	-0.868347	S	3	1	9.67e-07	156.51	136.598	2.77218	-0.670464
H0Y951;Q12955-5;Q12955-4;Q12955-6;Q12955-7;Q12955;H0Y3A4	70;1782;1789;922;1383;4298;380	H0Y951;Q12955-5	Ankyrin-3	ANK3	0	NaN	LKPKIHGSGHVEEPASPLAAYQKSLEETSKL	1	-1.1821	NaN	0.534759	NaN	NaN	NaN	S	3	1	4.26e-07	193.64	100.136	0.113252	-0.32367
Q12955-5;Q12955-4;Q12955-6;Q12955-7;Q12955	1399;1406;539;999;1405	Q12955-5	Ankyrin-3	ANK3	0	NaN	FKENRLPFSIKIRDTSQEPCGRLSFLKEPKT	1	-0.452037	NaN	-0.556669	NaN	NaN	NaN	S	2	0.963465	0.0136778	127.18	14.2113	1.18177	-0.504353
Q12955-5;Q12955-4;Q12955-6;Q12955-7;Q12955;H0Y3A4	1713;1720;853;1314;4229;311	Q12955-5	Ankyrin-3	ANK3	0	NaN	QARRVTGGLLDRLDDSPDQCRDSITSYLKGE	1	0.165558	NaN	-0.266455	NaN	NaN	NaN	S	2	1	0.00366437	118.97	42.976	0.0685748	-0.0504482
Q12955-5;Q12955-4;Q12955-6;Q12955-7;Q12955;H0Y3A4;H0YA66	1444;1451;584;1044;1459;42;10	Q12955-5	Ankyrin-3	ANK3	0	NaN	TLPAHKKIEKTDRRQSFASLALRKRYSYLTE	1	0.633385	NaN	0.284277	NaN	NaN	NaN	S	2	0.999983	0.00342564	105.14	47.6715	0.635587	0.458831
Q12955-5;Q12955-4;Q12955-6;H0Y3A4;H0YA66	1466;1473;606;64;32	Q12955-5	Ankyrin-3	ANK3	0	NaN	RKRYSYLTEPGMSPQSPCERTDIRMAIVADH	1	2.41438	NaN	2.00669	NaN	NaN	NaN	S	2	0.977724	0.00340284	75.773	16.4345	1.23255	2.21054
Q8IWZ3-6;Q8IWZ3;Q8IWZ3-4;H0Y4P6;H0Y785;H0Y472;H0Y7Y3;F6WFL0	1679;1679;1679;335;170;201;130;62	Q8IWZ3-6	Ankyrin repeat and KH domain-containing protein 1	ANKHD1	1.52604	0.345776	VSLPLSSPNIKLNLTSPKRGQKREEGWKEVV	1	0.479127	0.117163	0.482745	0.153157	0.361964	0.329588	S	2	0.998986	0.0067216	138.08	29.936	2.62077	0.480936
Q8IWZ3-6;Q8IWZ3;Q8IWZ3-4;E9PDP5;H0Y4P6;H0Y785;H0Y472	1538;1538;1538;1557;194;29;60	Q8IWZ3-6	Ankyrin repeat and KH domain-containing protein 1	ANKHD1	0.401468	-0.230245	TFTNVFGKKRANVVTTPSTNRKNKKNKTKET	1	-0.278584	0.117163	0.088413	0.153157	-0.395747	-0.0647438	T	2	0.96439	0.00298425	144.09	17.4173	0.157615	-0.0950853
Q8IWZ3-6;Q8IWZ3;Q8IWZ3-4;H0Y4P6;H0Y785;H0Y472;H0Y7Y3;F6WFL0	1670;1670;1670;326;161;192;121;53	Q8IWZ3-6	Ankyrin repeat and KH domain-containing protein 1	ANKHD1	0	-0.421157	NSLSTSYKTVSLPLSSPNIKLNLTSPKRGQK	1	NaN	0.117163	-0.268	0.153157	NaN	-0.421157	S	2	0.832773	0.00253299	89.624	6.9725	0	-0.268
Q8IWZ3-6;Q8IWZ3;Q8IWZ3-4;H0Y4P6;H0Y785;H0Y472;H0Y7Y3;F6WFL0	1669;1669;1669;325;160;191;120;52	Q8IWZ3-6	Ankyrin repeat and KH domain-containing protein 1	ANKHD1	0	-0.493324	PNSLSTSYKTVSLPLSSPNIKLNLTSPKRGQ	1	NaN	0.117163	-0.340167	0.153157	NaN	-0.493324	S	2	0.499929	0.00524587	77.776	0	0	-0.340167
Q8IWZ3-6;Q8IWZ3;Q8IWZ3-4;H0Y4P6;H0Y785;H0Y472;H7C0V5	2323;2323;2323;979;814;845;334	Q8IWZ3-6	Ankyrin repeat and KH domain-containing protein 1	ANKHD1;ANKHD1-EIF4EBP3	0	1.60478	IPGTRVFLQGPAPVGTPSFNRQHFSPHPWTS	1	1.72194	0.117163	NaN	0.153157	1.60478	NaN	T	2	0.993232	0.000610905	138.9	21.6659	0	1.72194
Q8IWZ3-6;H7C0V5	2539;558	Q8IWZ3-6	Ankyrin repeat and KH domain-containing protein 1	ANKHD1;ANKHD1-EIF4EBP3	2.03054	-0.446989	ASLLPSVPALKGEIPSPQLTRPKKRIGRPMV	1	-0.323281	0.117163	-0.300377	0.153157	-0.440444	-0.453534	S	2	0.999194	0.033614	68.576	30.9315	1.63135	-0.311829
Q9P2G1	891	Q9P2G1	Ankyrin repeat and IBR domain-containing protein 1	ANKIB1	0	NaN	RDFLSNEASLGAIGTSLPSRLDSVPRNTDSP	1	0.0360461	NaN	NaN	NaN	NaN	NaN	S	2	0.751663	0.000475258	96.793	6.09913	0	0.0360461
Q9P2G1	737	Q9P2G1	Ankyrin repeat and IBR domain-containing protein 1	ANKIB1	0	NaN	QEFLASVARGVAPADSPEAPRRSFAGGTWDW	1	-0.146515	NaN	-0.00965501	NaN	NaN	NaN	S	2	1	0.000669701	134.97	134.965	0.339031	-0.0780852
F5H2H5;Q86XL3;Q86XL3-3;F5H1D4	745;807;162;162	F5H2H5	Ankyrin repeat and LEM domain-containing protein 2	ANKLE2	0	1.02352	SEMSARIAKMSLSPSSPRHEDQLEVTREPAR	1	1.49549	0.471968	NaN	0.40621	1.02352	NaN	S	2	0.737552	0.00334959	130.99	4.51236	0	1.49549
F5H2H5;Q86XL3;Q86XL3-2;F5H6J0	466;528;528;91	F5H2H5	Ankyrin repeat and LEM domain-containing protein 2	ANKLE2	0	0.857271	PRDPVLTLRAFAGPLSPAKAEDFRKLWKTPP	1	1.32924	0.471968	NaN	0.40621	0.857271	NaN	S	2	1	0.00406026	110.91	110.906	0	1.32924
F5H2H5;Q86XL3;Q86XL3-2;F5H417	206;268;268;38	F5H2H5	Ankyrin repeat and LEM domain-containing protein 2	ANKLE2	0.689058	0.397445	ICDYFPSPSKTSLPLSPVKTAPLFSNDRLKD	1	0.737081	0.471968	0.935988	0.40621	0.265113	0.529778	S	2	0.999938	0.00342625	128.08	42.0668	1.12302	0.836534
F5H2H5;Q86XL3;Q86XL3-3;F5H1D4	600;662;17;17	F5H2H5	Ankyrin repeat and LEM domain-containing protein 2	ANKLE2	0.683693	-0.120069	SLEEIKNRQNAARNNSPPTVGAFGHTRCSAF	1	0.311387	0.471968	0.326652	0.40621	-0.160581	-0.0795578	S	3	0.99998	0.000273545	127.38	46.9937	1.81734	0.31902
F5H2H5;Q86XL3;Q86XL3-2;F5H417	197;259;259;29	F5H2H5	Ankyrin repeat and LEM domain-containing protein 2	ANKLE2	0.309768	-0.123836	EDAEKFARGICDYFPSPSKTSLPLSPVKTAP	1	0.228111	0.471968	0.402395	0.40621	-0.243857	-0.0038154	S	2	0.978188	0.00329038	135.02	16.5173	0.765262	0.315253
F5H2H5;Q86XL3;Q86XL3-3;F5H1D4	834;896;251;251	F5H2H5	Ankyrin repeat and LEM domain-containing protein 2	ANKLE2	0	-0.359649	RFKSQLPDLSGPHSYSPGRNSVAGSNPAKPG	1	NaN	0.471968	0.0465609	0.40621	NaN	-0.359649	S	2	0.787923	0.00441912	72.316	5.84877	0	0.0465609
F5H2H5;Q86XL3;Q86XL3-3	857;919;274	F5H2H5	Ankyrin repeat and LEM domain-containing protein 2	ANKLE2	0	-0.79534	GSNPAKPGLGSPGRYSPVHGSQLRRMARLAE	1	NaN	0.471968	-0.38913	0.40621	NaN	-0.79534	S	3	0.965719	0.000120881	104.18	14.5194	0	-0.38913
Q9NXR5	353	Q9NXR5	Ankyrin repeat domain-containing protein 10	ANKRD10	0	NaN	LRANPELCGSLHLNGSPSSCIASRPSWVEDI	1	-0.203951	NaN	-0.507296	NaN	NaN	NaN	S	3	0.675278	7.77e-05	79.512	4.40933	0.590665	-0.355623
Q6UB99	1296	Q6UB99	Ankyrin repeat domain-containing protein 11	ANKRD11	0	NaN	LEKLEEEALHEYREDSNDKISEVSSDSFTDR	1	-0.0109191	NaN	NaN	NaN	NaN	NaN	S	3	0.999999	0.000594755	76.301	61.0272	0	-0.0109191
Q6UB99	1983	Q6UB99	Ankyrin repeat domain-containing protein 11	ANKRD11	0	NaN	ENPVSWPVGSDLLLKSPQRFPESPKRFCPAD	2	NaN	NaN	NaN	NaN	NaN	NaN	S	2	1	0.0403542	117.07	103.668	0	NaN
Q6UB99	1990	Q6UB99	Ankyrin repeat domain-containing protein 11	ANKRD11	0	NaN	VGSDLLLKSPQRFPESPKRFCPADPLHSAAP	2	NaN	NaN	NaN	NaN	NaN	NaN	S	2	1	0.0403542	117.07	103.668	0	NaN
Q6UB99	276	Q6UB99	Ankyrin repeat domain-containing protein 11	ANKRD11	0	NaN	QQSNRKGETPLKVANSPTMVNLLLGKGTYTS	1	-0.00739111	NaN	0.0959919	NaN	NaN	NaN	S	2	0.997814	0.00124046	124.84	26.5933	0.26049	0.0443004
Q6UB98-2;Q6UB98	1166;1189	Q6UB98-2	Ankyrin repeat domain-containing protein 12	ANKRD12	0	NaN	TLGKSSFVSDNSLNRSPRSENEKPGLSSRSV	1	-1.06746	NaN	NaN	NaN	NaN	NaN	S	2	0.964016	0.0338098	71.872	14.6986	0	-1.06745
Q6ZTN6-2;Q6ZTN6;Q6ZTN6-3	202;465;552	Q6ZTN6-2	Ankyrin repeat domain-containing protein 13D	ANKRD13D	0	NaN	LQESLQLSTEPRGPGSPPRTPPAPGPPSFEE	2	NaN	NaN	NaN	NaN	NaN	NaN	S	3	0.999986	0.00168373	54.997	48.4064	0	NaN
Q6ZTN6-2;Q6ZTN6;Q6ZTN6-3	206;469;556	Q6ZTN6-2	Ankyrin repeat domain-containing protein 13D	ANKRD13D	0	NaN	LQLSTEPRGPGSPPRTPPAPGPPSFEEQLRL	2	NaN	NaN	NaN	NaN	NaN	NaN	T	3	0.999956	0.00168373	54.997	43.5791	0	NaN
O75179-2;O75179;H0YM23;E7EUV3;O75179-6;O75179-4;O75179-3;H0YMS3;O75179-5	226;226;111;113;226;226;226;44;226	O75179-2	Ankyrin repeat domain-containing protein 17	ANKRD17	0	NaN	ALDEAAAALTRMRAESTANAGQSDNRSLAEA	1	NaN	0.223546	NaN	0.160146	NaN	NaN	S	2	0.944375	0.0011847	91.616	12.2987	0	NaN
O75179-2;O75179;H0YM23;E7EUV3;O75179-6;O75179-4	2040;2041;1925;1928;1790;1448	O75179-2	Ankyrin repeat domain-containing protein 17	ANKRD17	0	NaN	NATYPMPTAKEHYPVSSPSSPSPPAQPGGVS	2;3	NaN	0.223546	NaN	0.160146	NaN	NaN	S	3	0.932776	6.1e-05	97.542	11.5312	0	NaN
O75179-2;O75179;H0YM23;E7EUV3;O75179-6;O75179-4	2043;2044;1928;1931;1793;1451	O75179-2	Ankyrin repeat domain-containing protein 17	ANKRD17	0	NaN	YPMPTAKEHYPVSSPSSPSPPAQPGGVSRNS	2;3	NaN	0.223546	NaN	0.160146	NaN	NaN	S	3	0.798562	9.26e-06	141.78	6.73541	0	NaN
O75179-2;O75179;H0YM23;E7EUV3;O75179-6;O75179-4	2046;2047;1931;1934;1796;1454	O75179-2	Ankyrin repeat domain-containing protein 17	ANKRD17	0	0.50206	PTAKEHYPVSSPSSPSPPAQPGGVSRNSPLD	1;2;3	NaN	0.223546	0.662206	0.160146	NaN	0.50206	S	3	0.999022	4.14e-08	181.92	29.8415	0	0.662205
O75179-2;O75179;H0YM23;E7EUV3;O75179-6;O75179-4	1634;1635;1519;1522;1384;1042	O75179-2	Ankyrin repeat domain-containing protein 17	ANKRD17	0	0.446675	SSCSDESSNSNSSRKSDNHSPAVVTTTVSSK	1	NaN	0.223546	0.606821	0.160146	NaN	0.446675	S	3	0.739931	0.000470546	71.651	4.54103	0	0.606821
O75179-2;O75179;H0YM23;E7EUV3;O75179-6;H0YLQ3	1456;1457;1341;1344;1206;824	O75179-2	Ankyrin repeat domain-containing protein 17	ANKRD17	1.64623	0.402066	VQAKDRQAAEANKNASILLEELDLEKLREES	1	0.63988	0.223546	0.547943	0.160146	0.416334	0.387798	S	2	1	0.000845215	143.83	85.3625	1.30825	0.593912
O75179-2;O75179;H0YM23;E7EUV3;O75179-6;O75179-4	1699;1700;1584;1587;1449;1107	O75179-2	Ankyrin repeat domain-containing protein 17	ANKRD17	0	0.36842	NSLSTCTKSGPSPLSSPNGKLTVASPKRGQK	1;2	0.591967	0.223546	NaN	0.160146	0.36842	NaN	S	2	0.81453	0.00430775	88.009	7.12781	0	0.591967
O75179-2;O75179;H0YM23;E7EUV3;O75179-6;O75179-4	1638;1639;1523;1526;1388;1046	O75179-2	Ankyrin repeat domain-containing protein 17	ANKRD17	0	0.340962	DESSNSNSSRKSDNHSPAVVTTTVSSKKQPS	1	NaN	0.223546	0.501108	0.160146	NaN	0.340962	S	2	0.980423	0.0104336	67.76	17.0082	0	0.501108
O75179-2;O75179;H0YM23;E7EUV3;O75179-6;O75179-4	1708;1709;1593;1596;1458;1116	O75179-2	Ankyrin repeat domain-containing protein 17	ANKRD17	0.422623	0.0977006	GPSPLSSPNGKLTVASPKRGQKREEGWKEVV	1	0.255319	0.223546	0.323774	0.160146	0.0317733	0.163628	S	2	1	0.0171337	105.2	66.9729	1.12548	0.289547
O75179-2;O75179;H0YM23;E7EUV3;O75179-6;O75179-4	2066;2067;1951;1954;1816;1474	O75179-2	Ankyrin repeat domain-containing protein 17	ANKRD17	0.147819	-0.0375913	PGGVSRNSPLDCGSASPNKVASSSEQEAGSP	1;2	0.108759	0.223546	0.199751	0.160146	-0.114788	0.039605	S	2	0.999381	2.3e-05	263.49	32.0782	0.738526	0.154255
O75179-2;O75179;H0YM23;E7EUV3;O75179-6;O75179-4	2064;2065;1949;1952;1814;1472	O75179-2	Ankyrin repeat domain-containing protein 17	ANKRD17	0	-0.0441804	AQPGGVSRNSPLDCGSASPNKVASSSEQEAG	1	NaN	0.223546	0.115965	0.160146	NaN	-0.0441804	S	2	0.5	0.00185634	90.348	0	0	0.115965
O75179-2;O75179;H0YM23;E7EUV3;O75179-6;O75179-4	1695;1696;1580;1583;1445;1103	O75179-2	Ankyrin repeat domain-containing protein 17	ANKRD17	0.211315	-0.157235	EGTSNSLSTCTKSGPSPLSSPNGKLTVASPK	1;2	0.293606	0.223546	-0.224385	0.160146	0.0700597	-0.38453	S	2	0.999999	0.000360681	172.43	65.8251	0.0383763	0.0346106
O75179-2;O75179;H0YM23;E7EUV3;O75179-6;O75179-4	2058;2059;1943;1946;1808;1466	O75179-2	Ankyrin repeat domain-containing protein 17	ANKRD17	0.15174	-0.215667	SSPSPPAQPGGVSRNSPLDCGSASPNKVASS	1;2	-0.423933	0.223546	0.37629	0.160146	-0.647479	0.216145	S	2	1	0.000412666	176.91	81.1706	0.0167605	-0.0238211
O75179-2;O75179;H0YM23;E7EUV3;O75179-6;O75179-4	1939;1940;1824;1827;1689;1347	O75179-2	Ankyrin repeat domain-containing protein 17	ANKRD17	0.757638	-0.321373	GPFPVRPLSPARATNSPKPHMVPRHSNQNSS	1	-0.188315	0.223546	-0.0707393	0.160146	-0.411861	-0.230885	S	3	0.999908	0.00054256	118.62	40.3667	0.566645	-0.129527
O75179-2;O75179;H0YM23;E7EUV3;O75179-6;O75179-4	2400;2401;2285;2288;2150;1808	O75179-2	Ankyrin repeat domain-containing protein 17	ANKRD17	1.29703	-0.358215	NDSSAQSVSSGVRAPSPAPSSVPLGSEKPSN	1	-0.163123	0.223546	-0.169615	0.160146	-0.386669	-0.329761	S	2	0.999999	0.000615663	164.01	61.8878	1.90587	-0.166369
O75179-2;O75179;O75179-6;O75179-4;O75179-3;H0YLQ3;O75179-5	5;5;5;5;5;5;5	O75179-2	Ankyrin repeat domain-containing protein 17	ANKRD17	1.73765	-0.625955	___________MEKATVPVAAATAAEGEGSP	1	-0.384414	0.223546	-0.483803	0.160146	-0.607961	-0.643949	T	3	0.770507	1.53e-05	103.96	5.60024	1.1393	-0.434109
O75179-2;O75179;H0YM23;E7EUV3;O75179-6;O75179-4	2041;2042;1926;1929;1791;1449	O75179-2	Ankyrin repeat domain-containing protein 17	ANKRD17	0	-0.877537	ATYPMPTAKEHYPVSSPSSPSPPAQPGGVSR	1;2;3	-0.653991	0.223546	NaN	0.160146	-0.877537	NaN	S	2	0.842748	1.85e-09	202.33	7.32215	0	-0.653991
O75179-2;O75179;H0YM23;E7EUV3;O75179-6;O75179-4	2044;2045;1929;1932;1794;1452	O75179-2	Ankyrin repeat domain-containing protein 17	ANKRD17	2.88337	-1.05551	PMPTAKEHYPVSSPSSPSPPAQPGGVSRNSP	1;2;3	-0.834133	0.223546	-0.893196	0.160146	-1.05768	-1.05334	S	3	0.98076	2.52e-09	197.99	19.1835	1.66235	-0.863665
Q9UPS8;Q9UPS8-3;E7ESJ3	530;530;546	Q9UPS8	Ankyrin repeat domain-containing protein 26	ANKRD26	0	NaN	DVQTSKAAEHDLEVASEEEQEREGSENNQPQ	1	NaN	NaN	0.322851	NaN	NaN	NaN	S	2	1	0.000241632	121.25	121.246	0	0.322851
Q9UPS8;Q9UPS8-3;E7ESJ3;Q9UPS8-2	630;631;647;188	Q9UPS8	Ankyrin repeat domain-containing protein 26	ANKRD26	0	NaN	KSTEKEKRTSKESVNSPVFGKASLLTGGLLQ	1	0.4609	NaN	-0.059495	NaN	NaN	NaN	S	2	0.999971	0.00474813	102.9	45.3375	0.235282	0.200702
Q9UPS8;Q9UPS8-3;E7ESJ3	11;11;11	Q9UPS8	Ankyrin repeat domain-containing protein 26	ANKRD26	0	NaN	_____MKKIFSKKGESPLGSFARRQRSSAGG	1	-0.526597	NaN	0.0820213	NaN	NaN	NaN	S	2	0.999995	0.00249583	104.86	52.6548	0.223032	-0.222288
Q9UPS8;Q9UPS8-3	489;489	Q9UPS8	Ankyrin repeat domain-containing protein 26	ANKRD26	0	NaN	LEDTRNVGMPVAHMESPERYLHLKPTIEMKD	1	0.0596321	NaN	0.0905825	NaN	NaN	NaN	S	2	1	0.00102664	136.66	136.661	0.888201	0.0751073
Q96NW4	962	Q96NW4	Ankyrin repeat domain-containing protein 27	ANKRD27	0	NaN	QFKGKTSREIMARDRSVPNLTEGSLHEPGRQ	1	NaN	NaN	-0.149841	NaN	NaN	NaN	S	3	0.999994	0.000115705	135.64	52.2458	0	-0.149841
O15084;O15084-4;O15084-1;O15084-2	1011;1041;1044;857	O15084	Serine/threonine-protein phosphatase 6 regulatory ankyrin repeat subunit A	ANKRD28	2.16471	0.796281	TFNAINRYTNTSKTVSFEALPIMRNEPSSYC	1	0.617298	-0.187543	0.673014	-0.114707	0.804841	0.787721	S	2	0.999287	0.00609049	91.62	31.4632	1.56111	0.645156
Q9BQI6	158	Q9BQI6	Ankyrin repeat domain-containing protein 32	ANKRD32	0	NaN	IRVLEAGKANVILPKSSPSGITHVIASNARI		NaN	NaN	NaN	NaN	NaN	NaN	S	2	0.480785	0.00173365	91.518	0	0	NaN
Q9BQI6	159	Q9BQI6	Ankyrin repeat domain-containing protein 32	ANKRD32	0	NaN	RVLEAGKANVILPKSSPSGITHVIASNARIK		NaN	NaN	NaN	NaN	NaN	NaN	S	2	0.480785	0.00173365	91.518	0	0	NaN
Q69YU3	461	Q69YU3	Ankyrin repeat domain-containing protein 34A	ANKRD34A	0	NaN	RAPSLPAPPYAGAPGSPRTKRKLVRRHSMQT	1	-1.35111	NaN	-1.11701	NaN	NaN	NaN	S	2	0.999999	0.000614911	113.36	61.7679	1.22037	-1.23406
Q69YU3	392	Q69YU3	Ankyrin repeat domain-containing protein 34A	ANKRD34A	0	NaN	APSPRQSQESLPGAVSPLSGRRRSPGLLERR	1	0.000721115	NaN	NaN	NaN	NaN	NaN	S	2	0.735501	0.00896916	59.163	5.15444	0	0.000721115
Q53RE8	153	Q53RE8	Ankyrin repeat domain-containing protein 39	ANKRD39	0	NaN	AERGHGDICSLLLQHSPALKAIRDRKARLAC	1	-1.00636	NaN	NaN	NaN	NaN	NaN	S	3	1	1.33e-05	184.35	104.11	0	-1.00636
Q6AI12	194	Q6AI12	Ankyrin repeat domain-containing protein 40	ANKRD40	0	NaN	HTSLALVQNGDVSAPSAILRTPESTKPGPVC	1	NaN	NaN	4.20633	NaN	NaN	NaN	S	3	0.60977	2.24e-05	105.9	2.72152	0	4.20633
D3YTC9;Q6NXT1;C9JU48;H7BZV9	58;58;58;71	D3YTC9	Ankyrin repeat domain-containing protein 54	ANKRD54	0	NaN	GSALGGGGAGLSGRASGGAQSPLRYLHVLWQ	2	NaN	NaN	NaN	-0.875778	NaN	NaN	S	2	1	0.000716473	101.72	101.723	0	NaN
D3YTC9;Q6NXT1;C9JU48;H7BZV9	63;63;63;76	D3YTC9	Ankyrin repeat domain-containing protein 54	ANKRD54	0	0.94493	GGGAGLSGRASGGAQSPLRYLHVLWQQDAEP	1;2	0.00201835	NaN	0.0691523	-0.875778	NaN	0.94493	S	2	1	0.000716473	217.96	101.723	0.317472	0.0355853
Q92625	652	Q92625	Ankyrin repeat and SAM domain-containing protein 1A	ANKS1A	0	NaN	EDATMGSRSESLSNCSIGKKRLEKSPSFASE	2	NaN	0.00144204	NaN	-0.129481	NaN	NaN	S	2	0.996208	0.0018803	83.894	24.2145	0	NaN
Q92625	636	Q92625	Ankyrin repeat and SAM domain-containing protein 1A	ANKS1A	0	2.15302	RSLSKSDSDLLTCSPTEDATMGSRSESLSNC	1	NaN	0.00144204	2.02354	-0.129481	NaN	2.15302	T	2	0.58384	0.000649703	85.805	1.47737	0	2.02354
Q92625	634	Q92625	Ankyrin repeat and SAM domain-containing protein 1A	ANKS1A	0	1.77057	LSRSLSKSDSDLLTCSPTEDATMGSRSESLS	1	1.77201	0.00144204	NaN	-0.129481	1.77057	NaN	S	2	0.823303	3.1e-05	217.86	6.68858	0	1.77201
Q92625	661	Q92625	Ankyrin repeat and SAM domain-containing protein 1A	ANKS1A	0	0.782475	ESLSNCSIGKKRLEKSPSFASEWDEIEKIMS	1	0.783918	0.00144204	NaN	-0.129481	0.782475	NaN	S	2	0.984697	0.000375428	157.58	18.0852	0	0.783918
Q92625	663	Q92625	Ankyrin repeat and SAM domain-containing protein 1A	ANKS1A	0.17194	0.0789687	LSNCSIGKKRLEKSPSFASEWDEIEKIMSSI	1	-0.0596002	0.00144204	0.0894982	-0.129481	-0.0610422	0.21898	S	2	0.999932	0.000823624	151.8	42.3225	0.0584823	0.014949
Q92625	318	Q92625	Ankyrin repeat and SAM domain-containing protein 1A	ANKS1A	0.316347	-0.125914	EDHMTGKRSTKEVDKTPPPQPPLISSMDSIS	1	-0.00523207	0.00144204	-0.374636	-0.129481	-0.00667411	-0.245155	T	3	0.999985	0.000643809	59.893	51.046	0.308821	-0.189934
Q92625	887	Q92625	Ankyrin repeat and SAM domain-containing protein 1A	ANKS1A	0	-0.125977	DLLLPPGDTGRRRHDSLHDPAAPSRAERFRI	1	-0.124535	0.00144204	NaN	-0.129481	-0.125976	NaN	S	3	1	0.000494144	174.21	89.7005	0	-0.124534
Q92625	647	Q92625	Ankyrin repeat and SAM domain-containing protein 1A	ANKS1A	0.628467	-0.278876	TCSPTEDATMGSRSESLSNCSIGKKRLEKSP	1;2	-0.38545	0.00144204	-0.300342	-0.129481	-0.386892	-0.17086	S	2	0.999999	0.00174624	184.32	64.0349	1.10455	-0.342896
Q92625	677	Q92625	Ankyrin repeat and SAM domain-containing protein 1A	ANKS1A	0	-0.331643	PSFASEWDEIEKIMSSIGEGIDFSQERQKIS	1	NaN	0.00144204	-0.461124	-0.129481	NaN	-0.331643	S	2	0.790132	0.00162409	96.143	5.75755	0	-0.461124
Q92625	626	Q92625	Ankyrin repeat and SAM domain-containing protein 1A	ANKS1A	0	-0.577996	SKPKAELKLSRSLSKSDSDLLTCSPTEDATM	1	NaN	0.00144204	-0.707477	-0.129481	NaN	-0.577996	S	2	0.499995	0.000840115	83.871	0	0	-0.707477
Q92625	676	Q92625	Ankyrin repeat and SAM domain-containing protein 1A	ANKS1A	0	-0.604647	SPSFASEWDEIEKIMSSIGEGIDFSQERQKI	1	-0.603205	0.00144204	NaN	-0.129481	-0.604647	NaN	S	2	0.631886	0.00131621	118.48	2.34656	0	-0.603205
Q92625	628	Q92625	Ankyrin repeat and SAM domain-containing protein 1A	ANKS1A	0.720679	-0.835336	PKAELKLSRSLSKSDSDLLTCSPTEDATMGS	1	-1.09123	0.00144204	-0.707477	-0.129481	-1.09268	-0.577996	S	2	0.563805	6.01e-05	161.68	1.11447	0.873489	-0.899355
H7C163;F5H7X9;Q68DC2;Q68DC2-4	204;539;734;735	H7C163	Ankyrin repeat and SAM domain-containing protein 6	ANKS6	0	NaN	SKRPPSGTSTTSKSTSPTLTPSPSPKGHTAE	1	-0.158913	NaN	-0.037636	NaN	NaN	NaN	S	2	0.974286	0.00232371	83.292	18.8855	0.453514	-0.0982743
Q9H8Y5;B8ZZS4	675;465	Q9H8Y5	Ankyrin repeat and zinc finger domain-containing protein 1	ANKZF1	0.900956	0.734746	LAAERRLAAQLGAPTSPIPDSAIVNTRRCWS	1	0.763582	-0.118054	0.652326	0.064469	0.881635	0.587857	S	2	0.798116	0.000338485	89.979	5.98671	1.30172	0.707954
Q9H8Y5;B8ZZS4	607;397	Q9H8Y5	Ankyrin repeat and zinc finger domain-containing protein 1	ANKZF1	1.40236	0.518106	PDAYDYNKAQVPGPLTPEMEARQATRKREQK	1	0.432318	-0.118054	0.55031	0.064469	0.550372	0.485841	T	2	1	0.000984417	119.48	62.9405	1.11873	0.491314
Q9H8Y5;B8ZZS4	398;188	Q9H8Y5	Ankyrin repeat and zinc finger domain-containing protein 1	ANKZF1	0.33387	-0.182357	KICRDEKEALGQNEESPKQGSGSEGEDGFQV	1	-0.137806	-0.118054	-0.280492	0.064469	-0.019753	-0.344961	S	2	1	0.000600831	177.21	69.3448	0.679277	-0.209149
Q9H8Y5;B8ZZS4	533;323	Q9H8Y5	Ankyrin repeat and zinc finger domain-containing protein 1	ANKZF1	0.814799	-0.23472	PADPRVLSLLSAPLGSGGFTLLHAAAAAGRG	1	-0.295181	-0.118054	-0.227844	0.064469	-0.177128	-0.292313	S	3	0.999554	1.1e-07	156.03	33.5609	1.08877	-0.261513
Q9NQW6-2;Q9NQW6	364;364	Q9NQW6-2	Actin-binding protein anillin	ANLN	0	0.667232	SREICLQSQSKDKSTTPGGTGIKPFLERFGE	1	0.740366	0.0731348	NaN	0.0316775	0.667232	NaN	T	2	0.99411	0.0324345	51.726	25.714	0	0.740366
Q9NQW6-2;Q9NQW6;C9JJT6	72;72;50	Q9NQW6-2	Actin-binding protein anillin	ANLN	0.820308	0.392676	EEKSCTKPSPSKKRCSDNTEVEVSNLENKQP	1	0.370722	0.0731348	0.519441	0.0316775	0.297588	0.487764	S	2	0.988599	6.38e-21	340.41	19.381	0.977216	0.445082
Q9NQW6-2;Q9NQW6;C9JJT6	75;75;53	Q9NQW6-2	Actin-binding protein anillin	ANLN	1.08272	0.354937	SCTKPSPSKKRCSDNTEVEVSNLENKQPVES	1	0.381726	0.0731348	0.432959	0.0316775	0.308592	0.401282	T	3	0.58781	0.0026583	55.546	1.54151	1.39813	0.407343
Q9NQW6-2;Q9NQW6;H7C1K5	755;792;146	Q9NQW6-2	Actin-binding protein anillin	ANLN	0.716804	0.283107	LNKLKNEGPQRKNKASPQSEFMPSKGSVTLS	1	0.268195	0.0731348	0.402831	0.0316775	0.19506	0.371154	S	2	0.999973	0.000515874	144.25	45.6741	0.899425	0.335513
Q9NQW6-2;Q9NQW6;H7C3S1;H7C1C2	890;927;92;131	Q9NQW6-2	Actin-binding protein anillin	ANLN	0.323155	0.159967	TSITTKSNIHSSVMASPGGLSAVRTSNFALV	1	0.0851526	0.0731348	0.339594	0.0316775	0.0120179	0.307916	S	2	0.999693	2.34e-05	183.25	35.3742	0.463955	0.212373
Q9NQW6-2;Q9NQW6;H7C1K5	624;661;20	Q9NQW6-2	Actin-binding protein anillin	ANLN	0.17898	0.0243812	GKFQRTRVPRAESGDSLGSEDRDLLYSIDAY	1	0.139076	0.0731348	0.0144981	0.0316775	0.0659417	-0.0171793	S	2	0.986304	0.00278392	89.358	18.6223	0.362636	0.0767873
Q9NQW6-2;Q9NQW6	194;194	Q9NQW6-2	Actin-binding protein anillin	ANLN	0.279616	-0.0314696	KAASPPRPLLSNASATPVGRRGRLANLAATI	1	0.075738	0.0731348	-0.0338649	0.0316775	0.00260322	-0.0655423	T	2	0.907253	0.00210606	83.404	9.90665	0.114821	0.0209366
Q9NQW6-2;Q9NQW6	472;472	Q9NQW6-2	Actin-binding protein anillin	ANLN	0.109122	-0.0523578	KSKQLETKQETHCQSTPLKKHQGVSKTQSLP	1	0.164658	0.0731348	-0.164561	0.0316775	0.0915228	-0.196239	T	2	0.961747	0.00155979	226.15	14.004	8.12e-05	4.83e-05
Q9NQW6-2;Q9NQW6	323;323	Q9NQW6-2	Actin-binding protein anillin	ANLN	0.292845	-0.143993	SCEGQNPELLPKTPISPLKTGVSKPIVKSTL	1	-0.21922	0.0731348	0.0360461	0.0316775	-0.292354	0.00436866	S	2	1	0.000171825	182.24	94.9787	0.219142	-0.0915867
Q9NQW6-2;Q9NQW6	524;561	Q9NQW6-2	Actin-binding protein anillin	ANLN	1.0015	-0.255784	VIREIEMSVDDDDINSSKVINDLFSDVLEEG	1	-0.22302	0.0731348	-0.183736	0.0316775	-0.296155	-0.215414	S	2	0.655742	0.000544927	177	2.79849	1.21258	-0.203378
Q9NQW6-2;Q9NQW6;C9JJT6	54;54;32	Q9NQW6-2	Actin-binding protein anillin	ANLN	1.5786	-0.278473	RARQPLSEASNQQPLSGGEEKSCTKPSPSKK	1	-0.216887	0.0731348	-0.235246	0.0316775	-0.290022	-0.266924	S	2	1	2.11e-23	332.2	121.059	1.58777	-0.226067
Q9NQW6-2;Q9NQW6	483;483	Q9NQW6-2	Actin-binding protein anillin	ANLN	0	-0.321945	HCQSTPLKKHQGVSKTQSLPVTEKVTENQIP	1	-0.248811	0.0731348	NaN	0.0316775	-0.321945	NaN	T	2	0.574039	0.0219848	57.792	1.29869	0	-0.248811
Q9NQW6-2;Q9NQW6	485;485	Q9NQW6-2	Actin-binding protein anillin	ANLN	1.43624	-0.366932	QSTPLKKHQGVSKTQSLPVTEKVTENQIPAK	1	-0.31493	0.0731348	-0.314123	0.0316775	-0.388065	-0.3458	S	2	0.999999	0.00316018	138.15	63.3723	3.08772	-0.314526
P39687;H0YN26;H7BZ09	27;27;27	P39687	Acidic leucine-rich nuclear phosphoprotein 32 family member A	ANP32A	0	NaN	RNRTPSDVKELVLDNSRSNEGKLEGLTDEFE	2	NaN	-0.0600213	NaN	0.00230651	NaN	NaN	S	2	1	0.00761268	157.58	77.2211	0	NaN
P39687;H0YN26;H7BZ09	29;29;29	P39687	Acidic leucine-rich nuclear phosphoprotein 32 family member A	ANP32A	0	NaN	RTPSDVKELVLDNSRSNEGKLEGLTDEFEEL	2	NaN	-0.0600213	NaN	0.00230651	NaN	NaN	S	2	1	0.00761268	157.58	77.2211	0	NaN
P39687;H0YN26;H7BZ09;O95626	17;17;17;17	P39687	Acidic leucine-rich nuclear phosphoprotein 32 family member A;Acidic leucine-rich nuclear phosphoprotein 32 family member D	ANP32A;ANP32D	0.00845702	0.0783724	EMGRRIHLELRNRTPSDVKELVLDNSRSNEG	1	-2.56807	-0.0600213	2.6671	0.00230651	-2.50805	2.66479	S	2	0.974468	0.0406041	91.469	15.8169	0.00526113	0.0495152
Q92688	244	Q92688	Acidic leucine-rich nuclear phosphoprotein 32 family member B	ANP32B	0.42872	-0.0547455	EEEEEGGKGEKRKRETDDEGEDD________	1	-0.0818275	0.00920381	-0.0257057	-0.00724608	-0.0910313	-0.0184596	T	2	1	0.00210839	245.82	71.8787	0.513961	-0.0537666
Q9H6X2-5;Q9H6X2	362;362	Q9H6X2-5	Anthrax toxin receptor 1	ANTXR1	0	NaN	CTVIIKEVPPPPAEESEEEDDDGLPKKKWPT	1	-0.683831	NaN	-0.733915	NaN	NaN	NaN	S	2	1	0.000491821	88.709	78.0979	1.6482	-0.708873
P07355;P07355-2;H0YN42;H0YMD0;H0YMU9;A6NMY6;H0YKS4;H0YMM1;H0YKZ7;H0YLV6;H0YMT9;H0YKX9;H0YKL9;H0YMW4;H0YKV8;H0YMD9;H0YNB8;H0YKN4	18;36;18;18;18;18;18;18;18;18;18;18;18;46;18;18;18;18	P07355	Annexin A2;Annexin;Putative annexin A2-like protein	ANXA2;ANXA2P2	0	0.0257432	TVHEILCKLSLEGDHSTPPSAYGSVKAYTNF	1	NaN	0.221196	0.234011	0.208268	NaN	0.0257432	S	2	0.628011	2.86e-05	158.52	2.28017	0	0.234011
P07355;P07355-2;H0YN42;H0YMD0;H0YMU9;A6NMY6;H0YKS4;H0YMM1;H0YKZ7;H0YLV6;H0YMT9;H0YKX9;H0YKL9;H0YMW4;H0YKV8;H0YMD9;H0YNB8;H0YKN4	19;37;19;19;19;19;19;19;19;19;19;19;19;47;19;19;19;19	P07355	Annexin A2;Annexin;Putative annexin A2-like protein	ANXA2;ANXA2P2	1.99	-0.124021	VHEILCKLSLEGDHSTPPSAYGSVKAYTNFD	1	0.0951818	0.221196	0.0862402	0.208268	-0.126015	-0.122027	T	2	0.99899	2.79e-10	255.63	30.0399	1.50375	0.090711
P07355;P07355-2;H0YN42;H0YMD0;H0YMU9;A6NMY6;H0YKS4;H0YMM1;H0YKZ7;H0YLV6;H0YMT9;H0YKX9;H0YKL9;H0YMW4;H0YKV8;H0YMD9;H0YNB8;H0YKN4	12;30;12;12;12;12;12;12;12;12;12;12;12;40;12;12;12;12	P07355	Annexin A2;Annexin;Putative annexin A2-like protein	ANXA2;ANXA2P2	0.555494	-0.241602	____MSTVHEILCKLSLEGDHSTPPSAYGSV	1	-0.133306	0.221196	0.0795658	0.208268	-0.354502	-0.128702	S	2	1	2.25e-37	309.43	79.0138	0.0743922	-0.0268699
Q9BXS5;Q9BXS5-2;E7ENJ6;B4DDG7;K7EJL1	154;154;154;82;82	Q9BXS5	AP-1 complex subunit mu-1	AP1M1	1.61773	-0.285742	GHKLETGAPRPPATVTNAVSWRSEGIKYRKN	1	-0.301266	-0.026352	-0.263906	0.0326651	-0.274914	-0.296571	T	3	0.999258	5.23e-07	195.8	32.2259	1.37653	-0.282586
H7C1E4;P61966	189;147	H7C1E4	AP-1 complex subunit sigma-1A	AP1S1	0	0.944672	LKAIEQADLLQEEDESPR_____________	1	0.953303	0.00863036	NaN	-0.0156075	0.944672	NaN	S	2	1	1.94e-08	230.71	230.71	0	0.953303
Q96CW1-2;Q96CW1;E9PFW3	154;156;181	Q96CW1-2	AP-2 complex subunit mu	AP2M1	0	0.318815	KSQTKEEQSQITSQVTGQIGWRREGIKYRRN	1	NaN	0.0267293	0.301588	-0.0172273	NaN	0.318815	T	2	0.999489	0.000737032	105.06	33.2115	0	0.301588
O00203;E5RJ68	609;560	O00203	AP-3 complex subunit beta-1	AP3B1	0.441177	0.173621	AKKIFLAQKPAPLLESPFKDRDHFQLGTLSH	1	0.199876	-0.0847315	0.108357	0.0457225	0.284608	0.0626346	S	2	1	0.00438941	143.31	98.3372	0.735786	0.154117
O00203;E5RJ68	276;227	O00203	AP-3 complex subunit beta-1	AP3B1	1.04745	0.157692	KEGDELEDNGKNFYESDDDQKEKTDKKKKPY	1	0.0506061	-0.0847315	0.225769	0.0457225	0.135338	0.180046	S	2	1	0.00262086	168.76	76.9141	0.444154	0.138187
Q13367;B7ZKS0;B7ZKR7	272;272;240	Q13367	AP-3 complex subunit beta-2	AP3B2	0	NaN	NESLLEENAEKAFYGSEEDEAKGAGSEETAA	1	-0.216518	NaN	-0.0166725	NaN	NaN	NaN	S	2	0.999578	0.00585325	92.939	33.7409	0.345751	-0.116595
G5E988;O14617-2	786;786	G5E988	AP-3 complex subunit delta-1	AP3D1	0	NaN	KEKEKKAEDLDFWLSTTPPPAPAPAPAPVPS		NaN	NaN	NaN	NaN	NaN	NaN	T	3	0.47413	6.43e-07	76.972	0	0	NaN
G5E988;O14617-2	787;787	G5E988	AP-3 complex subunit delta-1	AP3D1	0	NaN	EKEKKAEDLDFWLSTTPPPAPAPAPAPVPST	1	-1.13619	NaN	-1.26993	NaN	NaN	NaN	T	3	0.940774	2.22e-12	150.34	12.8186	1.45162	-1.20306
O14617-5	878	O14617-5	AP-3 complex subunit delta-1	AP3D1	0	NaN	EKEKKAEDLDFWLSTTPPPAPAPAPAPVPST		NaN	-0.0936173	NaN	-0.110822	NaN	NaN	T	3	0.439623	3.25e-05	100.11	0	0	NaN
G5E988;O14617-2;E7EMM2;O14617-3;O14617-5;O14617;O14617-4	567;567;489;489;658;658;658	G5E988;O14617-5	AP-3 complex subunit delta-1	AP3D1	0	2.27971	AVFHEEEQRRPKHRPSEADEEELARRREARK	1	2.18609	-0.0936173	NaN	-0.110822	2.27971	NaN	S	2	1	0.0195581	80.738	80.7384	0	2.18609
G5E988;O14617-2;E7EMM2;O14617-3;O14617-5;O14617	738;738;660;660;829;829	G5E988;O14617-5	AP-3 complex subunit delta-1	AP3D1	0	0.128256	EKLPIQKHRNTETSKSPEKDVPMVEKKSKKP	1	0.0346383	-0.0936173	NaN	-0.110822	0.128256	NaN	S	2	0.99998	1.76e-06	289.88	47.0957	0	0.0346383
O14617-5	877	O14617-5	AP-3 complex subunit delta-1	AP3D1	0	-1.34578	KEKEKKAEDLDFWLSTTPPPAPAPAPAPVPS	1	-1.4394	-0.0936173	NaN	-0.110822	-1.34579	NaN	T	3	0.581375	1.76e-18	157.2	3.17672	0	-1.4394
Q02410-2;Q02410	555;566	Q02410-2	Amyloid beta A4 precursor protein-binding family A member 1	APBA1	0	NaN	IGNIVVLMARRRMPRSNSQENVEASHPSQDG	1	NaN	NaN	0.410667	NaN	NaN	NaN	S	2	0.565174	0.0125838	52.451	1.14039	0	0.410667
Q99767-2;Q99767	466;478	Q99767-2	Amyloid beta A4 precursor protein-binding family A member 2	APBA2	0	NaN	IGNIVVLMARRRMPRSASQDCIETTPGAQEG	1	0.794936	NaN	NaN	NaN	NaN	NaN	S	2	0.514141	0.000604813	126.51	0.245714	0	0.794936
Q99767-2;Q99767	468;480	Q99767-2	Amyloid beta A4 precursor protein-binding family A member 2	APBA2	0	NaN	NIVVLMARRRMPRSASQDCIETTPGAQEGKK	1	1.10172	NaN	0.698041	NaN	NaN	NaN	S	2	0.864883	0.000160367	153.83	8.06246	0.852429	0.899879
O96018	271	O96018	Amyloid beta A4 precursor protein-binding family A member 3	APBA3	0	NaN	PDGETQPMTEVDLFVSTKRIKVLTADSQEAM	3	NaN	NaN	NaN	NaN	NaN	NaN	S	2	0.638892	0.00585273	51.225	0	0	NaN
O96018	11	O96018	Amyloid beta A4 precursor protein-binding family A member 3	APBA3	0	NaN	_____MDFPTISRSPSGPPAMDLEGPRDILV	1	-0.0593296	NaN	0.604546	NaN	NaN	NaN	S	2	0.987928	0.0137878	56.817	19.1296	0.250049	0.272608
O96018	260	O96018	Amyloid beta A4 precursor protein-binding family A member 3	APBA3	0	NaN	QAREAMDRVKAPDGETQPMTEVDLFVSTKRI	3	NaN	NaN	NaN	NaN	NaN	NaN	T	2	0.999942	0.00585273	51.225	37.9512	0	NaN
O96018	264	O96018	Amyloid beta A4 precursor protein-binding family A member 3	APBA3	0	NaN	AMDRVKAPDGETQPMTEVDLFVSTKRIKVLT	3	NaN	NaN	NaN	NaN	NaN	NaN	T	2	0.736465	0.00585273	51.225	1.45231	0	NaN
O96018	272	O96018	Amyloid beta A4 precursor protein-binding family A member 3	APBA3	0	NaN	DGETQPMTEVDLFVSTKRIKVLTADSQEAMM	3	NaN	NaN	NaN	NaN	NaN	NaN	T	2	0.638892	0.00585273	51.225	0	0	NaN
H0YAJ5;G5E9Y1;Q92870-2;Q92870;Q92870-4;D6RB55	113;123;123;123;123;106	H0YAJ5	Amyloid beta A4 precursor protein-binding family B member 2	APBB2	0	NaN	RKAAEQGQQDPNKNLSPTAVINITSEKLEGK	1	0.479231	NaN	0.199751	NaN	NaN	NaN	S	2	0.999826	0.00413744	69.979	37.6131	0.604521	0.339491
H0YAJ5;G5E9Y1;Q92870-2;Q92870;Q92870-4	217;227;227;227;227	H0YAJ5	Amyloid beta A4 precursor protein-binding family B member 2	APBB2	0	NaN	NRPQSSPEDGQVATVSSSPETKKDHPKTGAK		NaN	NaN	NaN	NaN	NaN	NaN	S	3	0.395484	4.45e-05	83.939	1.43106	0	NaN
P25054;P25054-2	2533;2432	P25054	Adenomatous polyposis coli protein	APC	0	NaN	NDGRPAKRHDIARSHSESPSRLPINRSGTWK	2	NaN	-0.0410015	NaN	-0.161589	NaN	NaN	S	2	0.999875	0.000183289	170	39.0554	0	NaN
P25054;P25054-2	2535;2434	P25054	Adenomatous polyposis coli protein	APC	0	NaN	GRPAKRHDIARSHSESPSRLPINRSGTWKRE	2	NaN	-0.0410015	NaN	-0.161589	NaN	NaN	S	3	0.999605	0.000183289	170	34.0348	0	NaN
P25054;P25054-2;E9PFT7;B7Z2B6	1044;943;1044;1026	P25054	Adenomatous polyposis coli protein	APC	0	NaN	LKYSDEQLNSGRQSPSQNERWARPKHIIEDE		NaN	-0.0410015	NaN	-0.161589	NaN	NaN	S	2	0.412772	0.0532088	50.752	0	0	NaN
P25054;P25054-2	2266;2165	P25054	Adenomatous polyposis coli protein	APC	0	NaN	PPLKTPASKSPSEGQTATTSPRGAKPSVKSE		NaN	-0.0410015	NaN	-0.161589	NaN	NaN	T	2	0.490013	0.00161507	93.909	4.5977	0	NaN
P25054;P25054-2	2093;1992	P25054	Adenomatous polyposis coli protein	APC	0	0.836049	LDLKDIQRPDSEHGLSPDSENFDWKAIQEGA	1	NaN	-0.0410015	0.674461	-0.161589	NaN	0.836049	S	3	0.891876	6.87e-05	97.057	9.17664	0	0.674461
P25054;P25054-2	2270;2169	P25054	Adenomatous polyposis coli protein	APC	0.349677	0.714421	TPASKSPSEGQTATTSPRGAKPSVKSELSPV	1	0.0690147	-0.0410015	1.15724	-0.161589	0.110016	1.31883	S	2	0.824403	1.62e-07	283.12	6.73386	0.335284	0.613126
P25054;P25054-2	2125;2024	P25054	Adenomatous polyposis coli protein	APC	0.527286	0.437496	SIVSSLHQAAAAACLSRQASSDSDSILSLKS	1	0.176195	-0.0410015	0.496207	-0.161589	0.217197	0.657795	S	2	1	2.26e-14	222.34	83.6254	0.54854	0.336201
P25054;P25054-2;E9PFT7;B7Z2B6	744;643;744;726	P25054	Adenomatous polyposis coli protein	APC	1.4374	0.37805	LMANRPAKYKDANIMSPGSSLPSLHVRKQKA	1	0.315334	-0.0410015	0.238175	-0.161589	0.356336	0.399764	S	2	0.999997	4.07e-08	232.82	54.6259	1.05465	0.276755
P25054;P25054-2	1371;1270	P25054	Adenomatous polyposis coli protein	APC	0	0.371904	SGAKSPSKSGAQTPKSPPEHYVQETPLMFSR	1	0.330902	-0.0410015	NaN	-0.161589	0.371904	NaN	S	2	1	0.000578124	142.43	90.8395	0	0.330903
P25054;P25054-2	2269;2168	P25054	Adenomatous polyposis coli protein	APC	0	0.271417	KTPASKSPSEGQTATTSPRGAKPSVKSELSP	1	NaN	-0.0410015	0.109829	-0.161589	NaN	0.271417	T	2	0.651772	0.000729419	155.63	3.38704	0	0.109829
P25054;P25054-2	2674;2573	P25054	Adenomatous polyposis coli protein	APC	0.425404	0.232123	VRIEDCPINNPRSGRSPTGNTPPVIDSVSEK	1	0.0357646	-0.0410015	0.225892	-0.161589	0.0767661	0.387481	S	2	0.922465	0.00201294	92.886	10.7568	0.397901	0.130828
P25054;P25054-2;E9PFT7;B7Z2B6	1042;941;1042;1024	P25054	Adenomatous polyposis coli protein	APC	0	0.118791	YSLKYSDEQLNSGRQSPSQNERWARPKHIIE	1	0.0777899	-0.0410015	NaN	-0.161589	0.118791	NaN	S	2	0.974642	0.000309481	162.22	16.1316	0	0.0777899
P25054;P25054-2;E9PFT7;B7Z2B6	908;807;908;890	P25054	Adenomatous polyposis coli protein	APC	0.0867551	0.0367177	EVSAIHTSQEDRSSGSTTELHCVTDERNALR	1	-0.129876	-0.0410015	0.000721115	-0.161589	-0.0888745	0.16231	S	2	0.943756	7.28e-07	247.79	12.2572	0.297971	-0.0645775
P25054;P25054-2	2835;2734	P25054	Adenomatous polyposis coli protein	APC	0.101672	0.015454	TDSTESSGTQSPKRHSGSYLVTSV_______	1	-0.0709817	-0.0410015	-0.100701	-0.161589	-0.0299802	0.0608881	S	2	0.748057	0.00249472	115.12	4.73995	0.962094	-0.0858411
P25054;P25054-2	2260;2159	P25054	Adenomatous polyposis coli protein	APC	0.286689	-0.0522761	PVSKKGPPLKTPASKSPSEGQTATTSPRGAK	1	-0.0381693	-0.0410015	-0.268973	-0.161589	0.00283225	-0.107384	S	2	0.991323	0.000855038	138.81	20.5787	0.386943	-0.153571
P25054;P25054-2	1773;1672	P25054	Adenomatous polyposis coli protein	APC	0.0936867	-0.0530912	SAPNKNQLDGKKKKPTSPVKPIPQNTEYRTR	1	-0.26285	-0.0410015	-0.0459228	-0.161589	-0.221848	0.115666	T	2	0.509585	0.0036328	100.41	0.166748	0.409062	-0.154386
P25054;P25054-2	2772;2671	P25054	Adenomatous polyposis coli protein	APC	0.113908	-0.0926772	VERTPFSSSSSSKHSSPSGTVAARVTPFNYN	1	0.110764	-0.0410015	-0.498709	-0.161589	0.151766	-0.33712	S	2	0.999221	0.00303777	153.15	31.0823	0.194407	-0.193972
P25054;P25054-2;E9PFT7;B7Z2B6	1100;999;1100;1082	P25054	Adenomatous polyposis coli protein	APC	0	-0.141703	KHLKFQPHFGQQECVSPYRSRGANGSETNRV	1	-0.182704	-0.0410015	NaN	-0.161589	-0.141703	NaN	S	2	0.999938	0.0136816	66.536	42.0556	0	-0.182704
P25054;P25054-2;E9PFT7;B7Z2B6	987;886;987;969	P25054	Adenomatous polyposis coli protein	APC	1.05204	-0.156005	GYGKRGQMKPSIESYSEDDESKFCSYGQYPA	1	-0.175126	-0.0410015	-0.339473	-0.161589	-0.134125	-0.177884	S	2	0.999991	9.65e-05	237.4	50.3981	0.705979	-0.2573
P25054;P25054-2	1774;1673	P25054	Adenomatous polyposis coli protein	APC	0.403589	-0.183001	APNKNQLDGKKKKPTSPVKPIPQNTEYRTRV	1	-0.354704	-0.0410015	-0.213889	-0.161589	-0.313703	-0.0523001	S	3	0.999516	4.52e-06	214.86	33.1477	0.810923	-0.284297
P25054;P25054-2;E9PFT7;B7Z2B6	780;679;780;762	P25054	Adenomatous polyposis coli protein	APC	0.731353	-0.197573	DAQHLSETFDNIDNLSPKASHRSKQRHKQSL	1	-0.297874	-0.0410015	-0.299862	-0.161589	-0.256873	-0.138273	S	3	1	1.3e-31	316.89	80.6802	2.67428	-0.298868
P25054;P25054-2	2323;2222	P25054	Adenomatous polyposis coli protein	APC	0.609186	-0.297999	TPSRPAQQPLSRPIQSPGRNSISPGRNGISP	1	-0.460211	-0.0410015	-0.338378	-0.161589	-0.419209	-0.176789	S	2	1	0.0159161	109.44	59.0674	1.01602	-0.399294
P25054;P25054-2	2449;2348	P25054	Adenomatous polyposis coli protein	APC	0	-0.336555	RPVLVRQSTFIKEAPSPTLRRKLEESASFES	1	-0.377557	-0.0410015	NaN	-0.161589	-0.336555	NaN	S	2	0.967037	0.014792	65.465	14.6741	0	-0.377557
P25054;P25054-2	2512;2411	P25054	Adenomatous polyposis coli protein	APC	1.15743	-0.364457	SSVQAGGWRKLPPNLSPTIEYNDGRPAKRHD	1	-0.44546	-0.0410015	-0.486044	-0.161589	-0.404459	-0.324456	S	3	0.973444	0.000132909	100.59	15.6421	1.55722	-0.465752
P25054;P25054-2	2557;2456	P25054	Adenomatous polyposis coli protein	APC	0	-0.483582	NRSGTWKREHSKHSSSLPRVSTWRRTGSSSS	1	-0.524583	-0.0410015	NaN	-0.161589	-0.483582	NaN	S	2	0.966788	0.0148637	114.39	14.6855	0	-0.524583
P25054;P25054-2;E9PFT7;B7Z2B6	748;647;748;730	P25054	Adenomatous polyposis coli protein	APC	0	-0.749982	RPAKYKDANIMSPGSSLPSLHVRKQKALEAE	1	-0.790983	-0.0410015	NaN	-0.161589	-0.749982	NaN	S	3	0.733579	0.000533458	69.765	4.58164	0	-0.790983
B5MDS5;O95996-2;O95996-3;O95996	436;436;709;710	B5MDS5	Adenomatous polyposis coli protein 2	APC2	0	NaN	LAHRPAKHQAAATAVSPGSCVPSLYVRKQRA	1	0.715015	NaN	NaN	NaN	NaN	NaN	S	2	0.941629	1.58e-05	158.29	12.0927	0	0.715015
C9JIF9;P13798;H7C393;H7C1U0;C9JLK2	187;187;184;112;86	C9JIF9	Acylamino-acid-releasing enzyme	APEH	0.375112	0.317715	KAESFFQTKALDVSASDDEIARLKKPDQAIK	1	-0.058473	-0.128472	0.409255	-0.156177	0.0699987	0.565432	S	2	0.989438	0.00183344	91.317	19.7163	0.228893	0.175391
Q9BZZ5;G3V1C3;B4E283;Q9BZZ5-1;H0YER7;Q9BZZ5-2;Q9BZZ5-5	462;462;451;390;277;462;408	Q9BZZ5;Q9BZZ5-2	Apoptosis inhibitor 5	API5	0	0.107451	QKVEIGQKRASEDTTSGSPPKKSSAGPKRDA	1	0.0840642	-0.0233871	NaN	0.0176369	0.107451	NaN	S	2	0.731981	3.86e-05	251.74	4.72641	0	0.0840642
Q9BZZ5;G3V1C3;B4E283;Q9BZZ5-1;H0YER7;Q9BZZ5-2;Q9BZZ5-5	464;464;453;392;279;464;410	Q9BZZ5;Q9BZZ5-2	Apoptosis inhibitor 5	API5	0.536366	0.00941369	VEIGQKRASEDTTSGSPPKKSSAGPKRDARQ	1	-0.0186003	-0.0233871	0.0316775	0.0176369	0.00478681	0.0140406	S	2	0.999809	8.74e-05	234.36	37.2477	0.0767531	0.00653859
J3KN82;Q96GX9;S4R3D6;Q96GX9-3	104;87;40;49	J3KN82	Methylthioribulose-1-phosphate dehydratase	APIP	0.567087	0.0544921	DMFVCDINEKDISGPSPSKKLKKSQCTPLFM	1	0.0106367	-0.068559	-0.0196236	-0.0494122	0.0791957	0.0297885	S	2	0.983368	0.00329724	120.49	17.7181	0.0881963	-0.00449348
E9PRH6;F8WET0;Q8IW19	107;131;131	E9PRH6	Aprataxin and PNK-like factor	APLF	0	NaN	SQVLDEDNILNETPKSPVINLPHETTGASQL	1	0.108223	NaN	0.187894	NaN	NaN	NaN	S	3	1	2.1e-05	116.49	72.5831	0.776449	0.148059
F5GZY0;Q06481-3;Q06481-6;Q06481;Q06481-4;Q06481-2;F5H845	120;213;223;213;213;213;57	F5GZY0	Amyloid-like protein 2	APLP2	1.91374	0.236609	TEYVCCPQTKIIGSVSKEEEEEDEEEEEEED	1	-0.274564	-0.515707	-0.226628	-0.458703	0.241143	0.232075	S	2	0.999848	0.018186	102.01	38.1943	1.21678	-0.250596
P04114	3945	P04114	Apolipoprotein B-100;Apolipoprotein B-48	APOB	0	NaN	VLGTHKIEDGTLASKTKGTFAHRDFSAEYEE	2	NaN	-6.34075	NaN	-3.26451	NaN	NaN	T	2	0.973056	0.035194	44.045	15.4964	0	NaN
P04114	3948	P04114	Apolipoprotein B-100;Apolipoprotein B-48	APOB	0	NaN	THKIEDGTLASKTKGTFAHRDFSAEYEEDGK	2	NaN	-6.34075	NaN	-3.26451	NaN	NaN	T	2	0.973039	0.035194	44.045	15.4964	0	NaN
Q9UKG1	401	Q9UKG1	DCC-interacting protein 13-alpha	APPL1	1.33106	0.484651	TAARVNQSALEAVTPSPSFQQRHESLRPAAG	1	0.371949	-0.0771171	0.351967	-0.168269	0.449066	0.520236	S	2	0.963505	2.26e-06	208.69	14.7296	1.75529	0.361958
Q9UKG1	691	Q9UKG1	DCC-interacting protein 13-alpha	APPL1	0	-1.19296	PNQASSEGQFVVLSSSQSEESDLGEGGKKRE	1	NaN	-0.0771171	-1.36123	-0.168269	NaN	-1.19296	S	3	0.70544	2.68e-07	148.51	4.50975	0	-1.36123
Q7Z2E3-9;Q7Z2E3-11;Q7Z2E3-8;Q7Z2E3-7;Q7Z2E3;Q7Z2E3-13;C9JZ40;Q7Z2E3-5;Q7Z2E3-10;C9J8U3;Q7Z2E3-4	121;135;135;121;135;121;81;67;81;67;33	Q7Z2E3-9	Aprataxin	APTX	0	NaN	NPGLETHRKRKRSGNSDSIERDAAQEAEAGT	1;2	NaN	-0.0455356	NaN	0.0576928	NaN	NaN	S	2	0.999819	0.00603489	108.53	37.4248	0	NaN
Q7Z2E3-9;Q7Z2E3-11;Q7Z2E3-8;Q7Z2E3-7;Q7Z2E3;Q7Z2E3-13;C9JZ40;Q7Z2E3-5;Q7Z2E3-10;C9J8U3;Q7Z2E3-4	118;132;132;118;132;118;78;64;78;64;30	Q7Z2E3-9	Aprataxin	APTX	1.36044	0.658117	EAKNPGLETHRKRKRSGNSDSIERDAAQEAE	1;2	0.657732	-0.0455356	0.670659	0.0576928	0.703267	0.612966	S	2	1	0.00127482	175.51	64.9864	2.20794	0.664195
P10398	212	P10398	Serine/threonine-protein kinase A-Raf	ARAF	0	NaN	FPFPAPANAPLQRIRSTSTPNVHMVSTTAPM		NaN	-0.737759	NaN	-0.497466	NaN	NaN	S	3	0.248972	9.42e-08	149.34	0	0	NaN
P10398	214	P10398	Serine/threonine-protein kinase A-Raf	ARAF	0	NaN	FPAPANAPLQRIRSTSTPNVHMVSTTAPMDS		NaN	-0.737759	NaN	-0.497466	NaN	NaN	S	3	0.248972	9.42e-08	149.34	0	0	NaN
P10398	222	P10398	Serine/threonine-protein kinase A-Raf	ARAF	0	NaN	LQRIRSTSTPNVHMVSTTAPMDSNLIQLTGQ		NaN	-0.737759	NaN	-0.497466	NaN	NaN	S	3	0.242222	9.59e-05	85.044	0	0	NaN
P10398	213	P10398	Serine/threonine-protein kinase A-Raf	ARAF	0	NaN	PFPAPANAPLQRIRSTSTPNVHMVSTTAPMD		NaN	-0.737759	NaN	-0.497466	NaN	NaN	T	3	0.248972	9.42e-08	149.34	0	0	NaN
P10398	215	P10398	Serine/threonine-protein kinase A-Raf	ARAF	0	NaN	PAPANAPLQRIRSTSTPNVHMVSTTAPMDSN		NaN	-0.737759	NaN	-0.497466	NaN	NaN	T	3	0.248972	9.42e-08	149.34	0	0	NaN
P10398	223	P10398	Serine/threonine-protein kinase A-Raf	ARAF	0	NaN	QRIRSTSTPNVHMVSTTAPMDSNLIQLTGQS		NaN	-0.737759	NaN	-0.497466	NaN	NaN	T	3	0.242222	9.59e-05	85.044	0	0	NaN
P10398	224	P10398	Serine/threonine-protein kinase A-Raf	ARAF	0	NaN	RIRSTSTPNVHMVSTTAPMDSNLIQLTGQSF		NaN	-0.737759	NaN	-0.497466	NaN	NaN	T	3	0.242222	9.59e-05	85.044	0	0	NaN
P10398;B4DMG5;P10398-2	157;157;157	P10398	Serine/threonine-protein kinase A-Raf	ARAF	0.599687	0.696087	TVCVDMSTNRQQFYHSVQDLSGGSRQHEAPS	1	0.248413	-0.737759	-0.0914637	-0.497466	0.986173	0.406002	S	2	0.985136	0.000603065	110.6	18.2231	0.139906	0.0784748
P10398	257	P10398	Serine/threonine-protein kinase A-Raf	ARAF	0	-0.265418	DAAGSRGGSDGTPRGSPSPASVSSGRKSPHS	1	-1.00318	-0.737759	NaN	-0.497466	-0.265418	NaN	S	2	0.98897	0.00733037	72.315	19.5378	0	-1.00318
Q96P48-3;Q96P48	229;229	Q96P48-3	Arf-GAP with Rho-GAP domain, ANK repeat and PH domain-containing protein 1	ARAP1	0	-0.179017	EIPPKPVRLFPEFDDSDYDEVPEEGPGAPAR	1	-0.363605	-0.184589	NaN	-0.0816291	-0.179016	NaN	S	2	0.986537	0.00180605	59.372	18.6498	0	-0.363605
Q96P48-3;Q96P48	70;70	Q96P48-3	Arf-GAP with Rho-GAP domain, ANK repeat and PH domain-containing protein 1	ARAP1	0	-0.557387	GHRRRILAGLLRAHTSPAPAPRPTPRPVPMK	1	-0.741976	-0.184589	NaN	-0.0816291	-0.557387	NaN	S	2	0.959556	0.0190796	75.018	13.753	0	-0.741976
P48444;B0YIW6;P48444-2	493;534;405	P48444	Coatomer subunit delta	ARCN1	0	0.863235	YCNIQVTKVTQVDGNSPVRFSTETTFLVDKY	1	0.886277	0.0230425	NaN	0.0429245	0.863235	NaN	S	2	0.999999	0.00410682	102.65	61.4223	0	0.886277
H0YJK5;G3V2B5;G3V506;O15033-2;O15033	85;337;176;337;337	H0YJK5	Apoptosis-resistant E3 ubiquitin protein ligase 1	AREL1	0	NaN	SQRRPSTAVDEEDEDSPSECHTPEKQFSVKE	1	-1.35879	NaN	NaN	NaN	NaN	NaN	S	3	0.993419	5.71e-05	83.939	21.823	0	-1.35879
Q8N6T3;Q8N6T3-2;F8VWH9;E7EV62;B7Z8H8;E5RHH7	360;368;294;315;247;116	Q8N6T3	ADP-ribosylation factor GTPase-activating protein 1	ARFGAP1	0	NaN	SSDSWTCADTSTERRSSDSWEVWGSASTNRN		NaN	0.202763	NaN	0.190425	NaN	NaN	S	2	0.442059	0.032778	54.103	0	0	NaN
Q8N6T3;Q8N6T3-2;F8VWH9;E7EV62;B7Z8H8;E5RHH7	361;369;295;316;248;117	Q8N6T3	ADP-ribosylation factor GTPase-activating protein 1	ARFGAP1	1.56008	1.56353	SDSWTCADTSTERRSSDSWEVWGSASTNRNS	1	1.69862	0.202763	1.82163	0.190425	1.49586	1.6312	S	2	0.887634	1.11e-08	263.87	9.1913	1.65293	1.76012
Q8N6T3;Q8N6T3-2;F8VWH9;E7EV62;B7Z8H8;E5RHH7;H0YIQ0	348;356;282;303;235;104;14	Q8N6T3	ADP-ribosylation factor GTPase-activating protein 1	ARFGAP1	0	1.54024	GSAEPTKTRKSPSSDSWTCADTSTERRSSDS	1;2	NaN	0.202763	1.73066	0.190425	NaN	1.54024	S	2	0.99983	2.59e-06	159.53	40.1027	0	1.73066
Q8N6T3;Q8N6T3-2;F8VWH9;E7EV62;B7Z8H8;E5RHH7;H0YIQ0	343;351;277;298;230;99;9	Q8N6T3	ADP-ribosylation factor GTPase-activating protein 1	ARFGAP1	1.3282	0.660836	FWETFGSAEPTKTRKSPSSDSWTCADTSTER	1;2	0.814755	0.202763	0.900104	0.190425	0.611993	0.709678	S	2	0.996462	1.23e-14	314.73	24.5006	1.49951	0.85743
Q8N6T3;Q8N6T3-2;F8VWH9;E7EV62;B7Z8H8;Q8N6T3-3;E5RHC5;F8W1U7;E5RHT6	189;189;115;136;76;189;189;115;115	Q8N6T3	ADP-ribosylation factor GTPase-activating protein 1	ARFGAP1	0.339034	0.0906433	SYQGAQGNRYVGFGNTPPPQKKEDDFLNNAM	1	0.372841	0.202763	0.201634	0.190425	0.170078	0.0112085	T	2	1	0.00177913	131.86	104.178	0.734258	0.287237
Q8N6H7;E9PIY6;E9PJT7;E9PK28;E9PN48;H0YF45	146;146;139;146;146;104	Q8N6H7	ADP-ribosylation factor GTPase-activating protein 2	ARFGAP2	0.597067	0.475345	TDLWIDNMSSAVPNHSPEKKDSDFFTEHTQP	1	0.182438	-0.0934788	0.62068	-0.0540927	0.275917	0.674773	S	3	1	3.94e-24	299.54	83.44	0.497569	0.401559
Q8N6H7;G5E9L0;B7Z9M7;B4DX29;H0YDN9;E9PMU9	432;296;163;325;154;139	Q8N6H7	ADP-ribosylation factor GTPase-activating protein 2	ARFGAP2	0.28534	0.172988	ESSEARQKFAGAKAISSDMFFGREVDAEYEA	1	0.262794	-0.0934788	-0.0643893	-0.0540927	0.356273	-0.0102966	S	2	0.998491	0.00439501	140.14	28.2054	0.185107	0.0992023
Q9NP61	143	Q9NP61	ADP-ribosylation factor GTPase-activating protein 3	ARFGAP3	0.272355	0.0560787	HGTDLWLDSCVVPPLSPPPKEEDFFASHVSP	1	0.207143	0.213503	0.257856	0.139339	-0.0063596	0.118517	S	2	1	2.97e-08	197.37	93.5269	1.16017	0.232499
Q9NP61;C9JZR4;Q9NP61-2;H0Y6A0	331;259;287;178	Q9NP61	ADP-ribosylation factor GTPase-activating protein 3	ARFGAP3	0.188082	-0.0572845	ISHSVTSDMQTIEQESPIMAKPRKKYNDDSD	1	0.0632269	0.213503	0.175045	0.139339	-0.150276	0.0357069	S	3	1	3.09e-05	135.02	78.5653	0.553875	0.119136
Q9Y6D6	394	Q9Y6D6	Brefeldin A-inhibited guanine nucleotide-exchange protein 1	ARFGEF1	0	NaN	PISVAYTPSLPDDRLSVSSNDTQESGNSSGP		NaN	-0.0718003	NaN	0.0190613	NaN	NaN	S	2	0.385924	0.00121578	72.99	0.673835	0	NaN
Q9Y6D6;E5RJN9	52;52	Q9Y6D6	Brefeldin A-inhibited guanine nucleotide-exchange protein 1	ARFGEF1	1.34587	0.223311	CEVALEEIKAETEKQSPPHGEAKAGSSTLPP	1	0.135666	-0.0718003	0.258217	0.0190613	0.207466	0.239156	S	3	1	2.91e-07	281.9	100.159	0.716629	0.196942
Q9Y6D6;E5RIF2;E5RHL7	1569;1023;407	Q9Y6D6	Brefeldin A-inhibited guanine nucleotide-exchange protein 1	ARFGEF1	0.382054	0.0829122	PSPVSEKPLDTISQKSVDIHDSIQPRSVDNR	1	0.0743684	-0.0718003	0.0387171	0.0190613	0.146169	0.0196558	S	2	1	0.00176302	181.77	99.7457	0.711255	0.0565427
Q9Y6D5	1525	Q9Y6D5	Brefeldin A-inhibited guanine nucleotide-exchange protein 2	ARFGEF2	0	NaN	QSLSSIDKNPSERGQSQLSNPTDDSWKGRPY	2	NaN	-0.120075	NaN	-0.199239	NaN	NaN	S	2	1	0.000912323	118.37	90.0352	0	NaN
Q9Y6D5	1511	Q9Y6D5	Brefeldin A-inhibited guanine nucleotide-exchange protein 2	ARFGEF2	0	NaN	EDSSEKHLDVDLDRQSLSSIDKNPSERGQSQ	2	NaN	-0.120075	NaN	-0.199239	NaN	NaN	S	3	0.940601	0.000294379	151.2	11.0813	0	NaN
Q9Y6D5	1514	Q9Y6D5	Brefeldin A-inhibited guanine nucleotide-exchange protein 2	ARFGEF2	0	NaN	SEKHLDVDLDRQSLSSIDKNPSERGQSQLSN	2	NaN	-0.120075	NaN	-0.199239	NaN	NaN	S	3	0.821322	0.000294379	151.2	6.29841	0	NaN
Q9Y6D5	277	Q9Y6D5	Brefeldin A-inhibited guanine nucleotide-exchange protein 2	ARFGEF2	2.07113	0.757881	KVSTENGDAPRERGSSLSGTDDGAQEVVKDI	1	0.647913	-0.120075	0.548535	-0.199239	0.767988	0.747774	S	2	0.972299	0.000947532	114.55	15.4566	1.27772	0.598224
Q9Y6D5	218	Q9Y6D5	Brefeldin A-inhibited guanine nucleotide-exchange protein 2	ARFGEF2	0	0.757731	QEARELEKPIQSKPQSPVIQAAAVSPKFVRL	1;2	0.637657	-0.120075	NaN	-0.199239	0.757731	NaN	S	2	1	3.41e-10	236.98	117.216	0	0.637657
Q9Y6D5	244	Q9Y6D5	Brefeldin A-inhibited guanine nucleotide-exchange protein 2	ARFGEF2	0	-0.0514757	KFVRLKHSQAQSKPTTPEKTDLTNGEHARSD	1	NaN	-0.120075	-0.250715	-0.199239	NaN	-0.0514757	T	2	0.980674	0.0106139	191.93	17.056	0	-0.250715
Q9Y6D5	1528	Q9Y6D5	Brefeldin A-inhibited guanine nucleotide-exchange protein 2	ARFGEF2	0.716707	-0.278351	SSIDKNPSERGQSQLSNPTDDSWKGRPYANQ	1;2	-0.485014	-0.120075	-0.391002	-0.199239	-0.36494	-0.191763	S	2	1	0.000249356	190.18	65.7255	1.1671	-0.438008
Q9Y6D5	227	Q9Y6D5	Brefeldin A-inhibited guanine nucleotide-exchange protein 2	ARFGEF2	2.31016	-0.534354	IQSKPQSPVIQAAAVSPKFVRLKHSQAQSKP	1;2	-0.658538	-0.120075	-0.729483	-0.199239	-0.538463	-0.530244	S	2	1	3.41e-10	236.98	117.216	1.48797	-0.69401
Q5TH69	2095	Q5TH69	Brefeldin A-inhibited guanine nucleotide-exchange protein 3	ARFGEF3	0	NaN	FSAGPELLRQDKRPRSGSTGSSLSVSVRDAE		NaN	0.729357	NaN	0.460061	NaN	NaN	S	2	0.483531	0.0298859	57.148	0	0	NaN
Q5TH69	2097	Q5TH69	Brefeldin A-inhibited guanine nucleotide-exchange protein 3	ARFGEF3	1.43593	1.71644	AGPELLRQDKRPRSGSTGSSLSVSVRDAEAQ	1	2.34687	0.729357	2.27542	0.460061	1.61752	1.81536	S	2	0.956589	0.000747144	164.41	15.0428	2.00702	2.31115
Q5TH69	1991	Q5TH69	Brefeldin A-inhibited guanine nucleotide-exchange protein 3	ARFGEF3	0.198477	0.83541	SLSLKAGGGDLLLPPSPKVEKKDPSRKKEWW	1	0.279055	0.729357	2.58118	0.460061	-0.450302	2.12112	S	2	1	0.00105998	122.16	97.2911	0.365079	1.43012
Q5TH69	2061	Q5TH69	Brefeldin A-inhibited guanine nucleotide-exchange protein 3	ARFGEF3	0	-0.512253	KVEKKGEPLGPRGQDSPLLQRPQHLMDQGQM	1	NaN	0.729357	-0.0521917	0.460061	NaN	-0.512253	S	3	1	0.00418525	43.696	43.6965	0	-0.0521917
P53367	76	P53367	Arfaptin-1	ARFIP1	0	NaN	IEAGAFQGSPAPPLPSVMSPSRVAASRLAQQ		NaN	NaN	NaN	NaN	NaN	NaN	S	3	0.424546	0.000634159	45.558	0	0	NaN
P53367	79	P53367	Arfaptin-1	ARFIP1	0	NaN	GAFQGSPAPPLPSVMSPSRVAASRLAQQGSD	1	0.270589	NaN	NaN	NaN	NaN	NaN	S	3	0.750651	2.25e-05	99.319	5.81458	0	0.270589
P53367;B4DS69;P53367-2	28;28;28	P53367;P53367-2	Arfaptin-1	ARFIP1	1.45113	1.56902	IPVTSNGEVDDSREHSFNRDLKHSLPSGLGL	1	1.49835	0.016639	1.70986	0.0535284	1.48171	1.65634	S	3	0.887398	2.81e-05	115.06	8.97628	1.37768	1.60411
P53367;B4DS69;P53367-2	361;181;329	P53367;P53367-2	Arfaptin-1	ARFIP1	0	1.32478	KQLEQTLKQFHIKLKTPGVDAPSWLEEQ___	1	1.34142	0.016639	NaN	0.0535284	1.32478	NaN	T	2	1	0.022111	155.53	70.0329	0	1.34142
P53367;P53367-2	132;100	P53367;P53367-2	Arfaptin-1	ARFIP1	0.971686	1.08004	IKNPAMEKLELVRKWSLNTYKCTRQIISEKL	1	1.27947	0.016639	0.950767	0.0535284	1.26283	0.897239	S	2	1	0.000125093	198.4	87.0701	1.03078	1.11512
P53367;P53367-2	39;39	P53367;P53367-2	Arfaptin-1	ARFIP1	0	0.496043	SREHSFNRDLKHSLPSGLGLSETQITSHGFD	1	0.512682	0.016639	NaN	0.0535284	0.496043	NaN	S	3	0.999968	6.22e-14	215.58	44.903	0	0.512682
P53365-3;P53365;E9PRV8;E9PPY7	34;72;72;72	P53365-3	Arfaptin-2	ARFIP2	0	3.03128	GSGDGLIPTGSGRHPSHSTTPSGPGDEVARG	1	3.06676	0.0354831	NaN	-0.0591191	3.03128	NaN	S	3	0.99986	9.62e-05	137.99	39.1843	0	3.06676
Q9NWB6;Q9NWB6-2	60;60	Q9NWB6	Arginine and glutamate-rich protein 1	ARGLU1	0.628761	1.03968	ESKRNRRRESRSRSRSTNTAVSRRERDRERA	1	0.820485	0.183201	1.58756	0.145482	0.637285	1.44207	S	2	0.974277	0.00952503	94.82	15.7841	0.707029	1.20402
Q9NWB6;Q9NWB6-2	77;77	Q9NWB6	Arginine and glutamate-rich protein 1	ARGLU1	0.204845	0.0585105	NTAVSRRERDRERASSPPDRIDIFGRTVSKR	1	0.154454	0.183201	0.29125	0.145482	-0.0287471	0.145768	S	2	0.999997	0.000212242	133.48	54.5777	0.722202	0.222852
Q07960;H0YE29;E9PNR6	49;47;49	Q07960	Rho GTPase-activating protein 1	ARHGAP1	0	NaN	PSDEMPDFPKSDDSKSSSPELVTHLKWDDPY	2	NaN	-0.0879481	NaN	-0.05291	NaN	NaN	S	2	0.666568	0.00183492	76.817	0	0	NaN
Q07960;H0YE29;E9PNR6	50;48;50	Q07960	Rho GTPase-activating protein 1	ARHGAP1	0	NaN	SDEMPDFPKSDDSKSSSPELVTHLKWDDPYY	2	NaN	-0.0879481	NaN	-0.05291	NaN	NaN	S	2	0.879073	0.00183492	79.652	8.57158	0	NaN
Q07960;H0YE29;E9PNR6	51;49;51	Q07960	Rho GTPase-activating protein 1	ARHGAP1	2.02998	0.812511	DEMPDFPKSDDSKSSSPELVTHLKWDDPYYD	1;2	0.736475	-0.0879481	0.747688	-0.05291	0.824423	0.800598	S	2	0.999989	0.00176532	181.88	49.7514	2.31788	0.742082
A1A4S6;E7EUW5;H0Y8W5	591;240;269	A1A4S6	Rho GTPase-activating protein 10	ARHGAP10	0	NaN	TPPDTTFPEPTCLSASPPNAPPRQSKRQGQR	1	-1.09292	NaN	-1.10433	NaN	NaN	NaN	S	3	0.965469	3.55e-05	92.412	14.4728	2.48109	-1.09863
B4DZN9;Q6P4F7;H3BR51	96;285;285	B4DZN9	Rho GTPase-activating protein 11A	ARHGAP11A	0	NaN	GEYETPGEYKRKRRQSVGDFVSGALNKFKPN	1	0.556012	NaN	0.677441	NaN	NaN	NaN	S	2	1	0.000127705	203.22	70.3613	1.20432	0.616726
B4DZN9;Q6P4F7;H3BR51;H3BQ41	134;323;323;36	B4DZN9	Rho GTPase-activating protein 11A	ARHGAP11A	0	NaN	QEERIAQLSESPVILTPNAKRTLPVDSSHGF	1	-0.444125	NaN	-0.0732414	NaN	NaN	NaN	T	2	0.999997	0.000755276	132.83	55.7476	0.402359	-0.258683
Q8IWW6-3;Q8IWW6-2;Q8IWW6-4;Q8IWW6	240;240;240;240	Q8IWW6-3	Rho GTPase-activating protein 12	ARHGAP12	0	NaN	EQIRATTPPNQGRPDSPVYANLQELKISQSA	2	NaN	NaN	NaN	NaN	NaN	NaN	S	3	0.999559	6.38e-05	91.599	36.3054	0	NaN
Q8IWW6-3;Q8IWW6-2;Q8IWW6-4;Q8IWW6	165;165;165;165	Q8IWW6-3	Rho GTPase-activating protein 12	ARHGAP12	0	NaN	LDLTHNNGKFNNDSHSPKVSSQNRTRSFGHF	1	-0.573338	NaN	0.151209	NaN	NaN	NaN	S	2	0.999968	0.00129999	191.48	44.9772	0.177727	-0.211064
Q8IWW6-3;Q8IWW6-2;Q8IWW6-4;Q8IWW6	215;215;215;215	Q8IWW6-3	Rho GTPase-activating protein 12	ARHGAP12	0	NaN	DSAGEGSERIHQDSESGDELSSSSTEQIRAT	1	-0.316456	NaN	-0.374804	NaN	NaN	NaN	S	2	0.988611	8.05e-05	131.04	19.3864	1.27076	-0.34563
Q8IWW6-3;Q8IWW6-2;Q8IWW6-4;Q8IWW6	176;176;176;176	Q8IWW6-3	Rho GTPase-activating protein 12	ARHGAP12	0	NaN	NDSHSPKVSSQNRTRSFGHFPGPEFLDVEKT	1	0.178364	NaN	0.628634	NaN	NaN	NaN	S	2	1	0.00129878	124.63	47.0818	0.489461	0.403499
Q8IWW6-3;Q8IWW6-2;Q8IWW6-4;Q8IWW6	103;103;103;103	Q8IWW6-3	Rho GTPase-activating protein 12	ARHGAP12	0	NaN	PNNSTKIMQSLHLQRSTENVNKLPELSSFGK	1	0.28238	NaN	0.481196	NaN	NaN	NaN	S	2	0.97457	1.77e-06	244.91	15.8347	0.79006	0.381788
Q8IWW6-3;Q8IWW6-2;Q8IWW6-4;Q8IWW6	540;562;587;592	Q8IWW6-3	Rho GTPase-activating protein 12	ARHGAP12	0	NaN	QAVETDEGIEEEIPDSPGIEKHDKEKEQKDP	1	0.286645	NaN	NaN	NaN	NaN	NaN	S	3	1	3.47e-05	110.13	89.057	0	0.286645
Q8IWW6-3;Q8IWW6-2;Q8IWW6-4;Q8IWW6	231;231;231;231	Q8IWW6-3	Rho GTPase-activating protein 12	ARHGAP12	0	NaN	GDELSSSSTEQIRATTPPNQGRPDSPVYANL	2	NaN	NaN	NaN	NaN	NaN	NaN	T	3	0.954029	6.38e-05	91.599	13.2799	0	NaN
Q68EM7-6;Q68EM7-5;Q68EM7;Q68EM7-3;Q68EM7-7;I3L460;I3L4Y5;Q68EM7-2	762;762;762;489;295;130;50;684	Q68EM7-6;Q68EM7-2	Rho GTPase-activating protein 17	ARHGAP17	0	NaN	LEQPSHTPPQTPTPPSTPPLGKQNPSLPAPQ	2	NaN	-0.247731	NaN	-0.383021	NaN	NaN	S	4	0.597892	1.14e-15	118.18	1.64328	0	NaN
Q68EM7-6;Q68EM7-5;Q68EM7;Q68EM7-3;Q68EM7-7;I3L460;Q68EM7-2	704;704;704;431;237;72;626	Q68EM7-6;Q68EM7-2	Rho GTPase-activating protein 17	ARHGAP17	0	NaN	PSAPSQLSAPRRYSSSLSPIQAPNHPPPQPP		NaN	-0.247731	NaN	-0.383021	NaN	NaN	S	4	0.462499	4.47e-08	94.942	0	0	NaN
Q68EM7-6;Q68EM7-5;Q68EM7;Q68EM7-3;Q68EM7-7;I3L460;Q68EM7-2	706;706;706;433;239;74;628	Q68EM7-6;Q68EM7-2	Rho GTPase-activating protein 17	ARHGAP17	0	NaN	APSQLSAPRRYSSSLSPIQAPNHPPPQPPTQ		NaN	-0.247731	NaN	-0.383021	NaN	NaN	S	4	0.462499	4.47e-08	94.942	0	0	NaN
Q68EM7-6;Q68EM7-5;Q68EM7;C9IZD3;Q68EM7-4;Q68EM7-2	161;161;161;160;161;161	Q68EM7-6;Q68EM7-2	Rho GTPase-activating protein 17	ARHGAP17	0	NaN	LDWDSVRARWNQAHKSSGTNFQGLPSKIDTL		NaN	-0.247731	NaN	-0.383021	NaN	NaN	S	2	0.497816	0.00217429	111.64	0	0	NaN
Q68EM7-6;Q68EM7-5;Q68EM7;C9IZD3;Q68EM7-4;Q68EM7-2	162;162;162;161;162;162	Q68EM7-6;Q68EM7-2	Rho GTPase-activating protein 17	ARHGAP17	0	NaN	DWDSVRARWNQAHKSSGTNFQGLPSKIDTLK		NaN	-0.247731	NaN	-0.383021	NaN	NaN	S	2	0.497816	0.00217429	111.64	0	0	NaN
Q68EM7-2	497	Q68EM7-2	Rho GTPase-activating protein 17	ARHGAP17	0	NaN	PASMAVMEGDLVKKESPPKPKDPVSAAVPAP	1	NaN	NaN	-0.234975	NaN	NaN	NaN	S	2	1	0.0638987	83.045	83.0451	0	-0.234975
Q68EM7-6;Q68EM7-5;Q68EM7;Q68EM7-3;Q68EM7-7;I3L460;I3L4Y5;Q68EM7-2	759;759;759;486;292;127;47;681	Q68EM7-6;Q68EM7-2	Rho GTPase-activating protein 17	ARHGAP17	0	NaN	EHGLEQPSHTPPQTPTPPSTPPLGKQNPSLP	2	NaN	-0.247731	NaN	-0.383021	NaN	NaN	T	4	0.967895	1.14e-15	118.18	16.8536	0	NaN
Q68EM7-6;Q68EM7-5;Q68EM7;Q68EM7-3;Q68EM7-7;I3L460;Q68EM7-2	702;702;702;429;235;70;624	Q68EM7-6;Q68EM7-2	Rho GTPase-activating protein 17	ARHGAP17	0.549982	0.175563	GQPSAPSQLSAPRRYSSSLSPIQAPNHPPPQ	1;2	-0.155405	-0.247731	-0.12422	-0.383021	0.0923255	0.258801	S	3	0.884755	6.74e-18	204.57	10.0732	1.15053	-0.139813
Q68EM7-6;Q68EM7-5;Q68EM7;Q68EM7-3;Q68EM7-7	575;575;575;302;108	Q68EM7-6	Rho GTPase-activating protein 17	ARHGAP17	1.30761	-0.241151	SSAGILEQGPSPGDGSPPKPKDPVSAAVPAP	1	-0.470189	-0.247731	-0.642865	-0.383021	-0.222458	-0.259843	S	2	0.999916	9.08e-40	279.9	40.7364	1.00885	-0.556527
Q68EM7-6;Q68EM7-5;Q68EM7;Q68EM7-3;Q68EM7-7;Q68EM7-2	625;625;625;352;158;547	Q68EM7-6;Q68EM7-2	Rho GTPase-activating protein 17	ARHGAP17	0.813948	-0.431644	SHQLSMGQPHNAAGPSPHTLRRAVKKPAPAP	1	-0.785502	-0.247731	-0.708538	-0.383021	-0.537771	-0.325516	S	3	0.995627	2.55e-100	390.92	23.5728	1.48458	-0.74702
Q68EM7-6;Q68EM7-5;Q68EM7;Q68EM7-3;Q68EM7-7;I3L460;Q68EM7-2	665;665;665;392;198;33;587	Q68EM7-6;Q68EM7-2	Rho GTPase-activating protein 17	ARHGAP17	1.21813	-0.692727	HPGGQSSSGTSQHPPSLSPKPPTRSPSPPTQ	1	-1.00651	-0.247731	-1.0097	-0.383021	-0.758776	-0.626678	S	4	0.716451	2.98e-06	116.96	4.23691	2.99662	-1.0081
Q68EM7-6;Q68EM7-5;Q68EM7;Q68EM7-3;Q68EM7-7;I3L460;Q68EM7-2	674;674;674;401;207;42;596	Q68EM7-6;Q68EM7-2	Rho GTPase-activating protein 17	ARHGAP17	0	-0.732827	TSQHPPSLSPKPPTRSPSPPTQHTGQPPGQP	1;2	NaN	-0.247731	-1.11585	-0.383021	NaN	-0.732827	S	3	0.99903	2.93e-05	93.34	31.9385	0	-1.11585
Q68EM7-6;Q68EM7-5;Q68EM7;Q68EM7-3;Q68EM7-7;I3L460;Q68EM7-2	667;667;667;394;200;35;589	Q68EM7-6;Q68EM7-2	Rho GTPase-activating protein 17	ARHGAP17	0.891502	-0.77078	GGQSSSGTSQHPPSLSPKPPTRSPSPPTQHT	1	-1.17609	-0.247731	-0.996225	-0.383021	-0.928357	-0.613204	S	4	0.835877	5.86e-09	156.73	7.82421	1.27909	-1.08616
Q68EM7-6;Q68EM7-5;Q68EM7;Q68EM7-3;Q68EM7-7;I3L460;Q68EM7-2	676;676;676;403;209;44;598	Q68EM7-6;Q68EM7-2	Rho GTPase-activating protein 17	ARHGAP17	1.20087	-0.875486	QHPPSLSPKPPTRSPSPPTQHTGQPPGQPSA	1;2	-1.2101	-0.247731	-1.17163	-0.383021	-0.962365	-0.788607	S	3	0.997261	5.99e-06	128.63	27.1151	1.98796	-1.19086
C9IZI4;H7C5Z9;H7BXR8;Q14CB8-6;Q14CB8-7;Q14CB8-3;Q14CB8;Q14CB8-2;Q14CB8-4	445;465;474;445;459;465;474;474;92	C9IZI4	Rho GTPase-activating protein 19	ARHGAP19	0	NaN	SKENRNLLFSGSPAVTMTPTRLKWSEGKKEG		NaN	NaN	NaN	-0.614072	NaN	NaN	T	2	0.444904	0.00981684	74.776	0	0	NaN
C9IZI4;H7C5Z9;H7BXR8;Q14CB8-6;Q14CB8-7;Q14CB8-3;Q14CB8;Q14CB8-2;Q14CB8-4	447;467;476;447;461;467;476;476;94	C9IZI4	Rho GTPase-activating protein 19	ARHGAP19	0	NaN	ENRNLLFSGSPAVTMTPTRLKWSEGKKEGKK		NaN	NaN	NaN	-0.614072	NaN	NaN	T	2	0.444904	0.00981684	74.776	0	0	NaN
C9IZI4;H7C5Z9;H7BXR8;Q14CB8-6;Q14CB8-7;Q14CB8-3;Q14CB8;Q14CB8-2;Q14CB8-4	373;393;402;373;387;393;402;402;20	C9IZI4	Rho GTPase-activating protein 19	ARHGAP19	0	NaN	AKKKQLIRQFNKQSLTQTPGREPSTSQVQKR		NaN	NaN	NaN	-0.614072	NaN	NaN	T	3	0.492618	0.00411387	50.077	0	0	NaN
C9IZI4;H7C5Z9;H7BXR8;Q14CB8-6;Q14CB8-7;Q14CB8-3;Q14CB8;Q14CB8-2;Q14CB8-4	375;395;404;375;389;395;404;404;22	C9IZI4	Rho GTPase-activating protein 19	ARHGAP19	0	NaN	KKQLIRQFNKQSLTQTPGREPSTSQVQKRAR	1	-0.0368219	NaN	NaN	-0.614072	NaN	NaN	T	3	0.77707	0.00411387	50.077	6.11817	0	-0.0368219
C9IZI4;H7C5Z9;H7BXR8;Q14CB8-6;Q14CB8-7;Q14CB8-3;Q14CB8;Q14CB8-2;Q14CB8-4	393;413;422;393;407;413;422;422;40	C9IZI4	Rho GTPase-activating protein 19	ARHGAP19	0	0.525173	REPSTSQVQKRARSRSFSGLIKRKVLGNQMM	1	-0.546245	NaN	-0.088899	-0.614072	NaN	0.525173	S	2	0.989511	0.0152628	118.76	20.395	0.400889	-0.317572
Q5T5U3	1430	Q5T5U3	Rho GTPase-activating protein 21	ARHGAP21	0	NaN	AASRKRKKPKEKAQPSSSEDELDNVFFKKEN		NaN	NaN	NaN	NaN	NaN	NaN	S	2	0.333333	0.0198078	46.494	0	0	NaN
Q5T5U3	1431	Q5T5U3	Rho GTPase-activating protein 21	ARHGAP21	0	NaN	ASRKRKKPKEKAQPSSSEDELDNVFFKKENV		NaN	NaN	NaN	NaN	NaN	NaN	S	2	0.333333	0.0198078	46.494	0	0	NaN
Q5T5U3	1432	Q5T5U3	Rho GTPase-activating protein 21	ARHGAP21	0	NaN	SRKRKKPKEKAQPSSSEDELDNVFFKKENVE	1	-0.0997263	NaN	-0.341574	NaN	NaN	NaN	S	2	0.768324	0.00294776	71.592	6.16978	0.495994	-0.22065
Q5T5U3	1712	Q5T5U3	Rho GTPase-activating protein 21	ARHGAP21	0	NaN	IECDTLSRKKSARFKSDSGSLGDAKNEKEAP	2	NaN	NaN	NaN	NaN	NaN	NaN	S	2	0.998635	0.00279494	100.02	26.8539	0	NaN
Q5T5U3	1716	Q5T5U3	Rho GTPase-activating protein 21	ARHGAP21	0	NaN	TLSRKKSARFKSDSGSLGDAKNEKEAPSLTK	2	NaN	NaN	NaN	NaN	NaN	NaN	S	2	0.662856	0.00279494	100.02	2.92708	0	NaN
Q5T5U3;E7ESW5;F8W9U9;Q5T5U3-3	615;616;606;605	Q5T5U3	Rho GTPase-activating protein 21	ARHGAP21	0	NaN	TTCGMSLPRGISQDRSPLVKVRSNSLKAPST	1	0.0807941	NaN	0.0299829	NaN	NaN	NaN	S	2	0.99985	0.00701695	107.5	38.2384	0.562602	0.0553885
Q5T5U3;E7ESW5;F8W9U9;Q5T5U3-3	923;924;914;913	Q5T5U3	Rho GTPase-activating protein 21	ARHGAP21	0	NaN	ADSQKSSEDSGSRKDSSSEVFSDAAKEGWLH	1	0.137766	NaN	2.75645	NaN	NaN	NaN	S	2	0.99819	1.42e-16	256.68	27.6027	0.329561	1.44711
Q5T5U3	1668	Q5T5U3	Rho GTPase-activating protein 21	ARHGAP21	0	NaN	FRGKLQEVTKSSRRNSEGSELSCTEGSLTSS		NaN	NaN	NaN	NaN	NaN	NaN	S	3	0.4891	0.000862248	52.754	0	0	NaN
Q5T5U3	1671	Q5T5U3	Rho GTPase-activating protein 21	ARHGAP21	0	NaN	KLQEVTKSSRRNSEGSELSCTEGSLTSSLDS		NaN	NaN	NaN	NaN	NaN	NaN	S	3	0.4891	0.000862248	52.754	0	0	NaN
Q5T5U3;E7ESW5;F8W9U9;Q5T5U3-3	476;477;467;466	Q5T5U3	Rho GTPase-activating protein 21	ARHGAP21	0	NaN	RLEDSVLMKYCPRSASQGALTSPSVSFSNHR	1	-0.276485	NaN	-0.532512	NaN	NaN	NaN	S	2	0.990081	1.82e-05	186.58	19.992	0.709687	-0.404498
Q5T5U3	1741	Q5T5U3	Rho GTPase-activating protein 21	ARHGAP21	0	NaN	APSLTKVFDVMKKGKSTGSLLTPTRGESEKQ	1	-0.0836762	NaN	NaN	NaN	NaN	NaN	S	2	0.921525	0.00238259	171.26	10.6978	0	-0.0836762
Q5T5U3;E7ESW5;F8W9U9;Q5T5U3-3	456;457;447;446	Q5T5U3	Rho GTPase-activating protein 21	ARHGAP21	0	NaN	TSHDRVPQSVQIRQRSVSQERLEDSVLMKYC		NaN	NaN	NaN	NaN	NaN	NaN	S	2	0.499265	0.0590698	56.424	0	0	NaN
Q5T5U3;E7ESW5;F8W9U9;Q5T5U3-3	458;459;449;448	Q5T5U3	Rho GTPase-activating protein 21	ARHGAP21	0	NaN	HDRVPQSVQIRQRSVSQERLEDSVLMKYCPR		NaN	NaN	NaN	NaN	NaN	NaN	S	2	0.499265	0.0590698	56.424	0	0	NaN
Q5T5U3;E7ESW5;F8W9U9;Q5T5U3-3	880;881;871;870	Q5T5U3	Rho GTPase-activating protein 21	ARHGAP21	0	NaN	PSLDAQPNSKTERSKSYDEGLDDYREDAKLS	1	0.269033	NaN	-0.0261316	NaN	NaN	NaN	S	2	1	0.00136431	155.75	72.9254	0.25054	0.121451
Q5T5U3;E7ESW5;F8W9U9;Q5T5U3-3	318;319;309;308	Q5T5U3	Rho GTPase-activating protein 21	ARHGAP21	0	NaN	GVSEQTSLKTVSRTTSPPLSIPTTHLIHQPA	1	-0.2446	NaN	NaN	NaN	NaN	NaN	S	3	0.97243	3.2e-05	115.57	18.5166	0	-0.2446
Q5T5U3;E7ESW5;F8W9U9;Q5T5U3-3	746;747;737;736	Q5T5U3	Rho GTPase-activating protein 21	ARHGAP21	0	NaN	KEAVILREKPPSGRQTPQPLRHQSYILAVND	1	-0.63895	NaN	NaN	NaN	NaN	NaN	T	2	0.818358	0.0118395	75.018	6.53726	0	-0.63895
D6R9V6;A6NJ38;A6NHM7;Q7Z5H3-4;Q7Z5H3-3;Q7Z5H3;Q7Z5H3-5;Q7Z5H3-2	228;236;286;191;305;395;401;411	D6R9V6	Rho GTPase-activating protein 22	ARHGAP22	0	NaN	QGEPGGPGLPAHRTSSLDGAAVAVLSRTAPT	1	0.381726	NaN	0.378068	NaN	NaN	NaN	S	2	0.996931	0.00170264	98.062	28.1276	2.51349	0.379897
F8VWZ8;Q52LW3	949;949	F8VWZ8	Rho GTPase-activating protein 29	ARHGAP29	0	NaN	IHTSESESKIFERATSFEESERKQNALGKCD	1	-0.213387	NaN	0.582556	NaN	NaN	NaN	S	2	0.998977	0.0162551	68.657	32.2401	0.140545	0.184585
Q2M1Z3	1178	Q2M1Z3	Rho GTPase-activating protein 31	ARHGAP31	0	NaN	QDLDIVAHALTGRRNSAPVSVSAVRTSFMVK	1	0.148739	NaN	0.152508	NaN	NaN	NaN	S	2	0.996285	0.0149327	56.906	24.5763	2.09883	0.150623
Q2M1Z3	346	Q2M1Z3	Rho GTPase-activating protein 31	ARHGAP31	0	NaN	GQRLSVEKATIRPAKSMDSLCSVPVEGKETK	1	0.551688	NaN	0.728922	NaN	NaN	NaN	S	2	0.999918	0.00153	104.16	40.8495	1.05774	0.640305
Q2M1Z3	476	Q2M1Z3	Rho GTPase-activating protein 31	ARHGAP31	0	NaN	PSKSVFTSSLFQMEPSPRNQRKALNISEPFA	1	0.472592	NaN	NaN	NaN	NaN	NaN	S	2	1	0.000623425	154.75	93.6511	0	0.472592
A7KAX9-2;A7KAX9;G3V174	603;952;878	A7KAX9-2	Rho GTPase-activating protein 32	ARHGAP32	0	NaN	STWDKCVEERDATNRSPTQIVKMKTNETVAQ	1	0.244887	NaN	0.204015	NaN	NaN	NaN	S	2	0.987444	0.00193413	165.57	20.0885	1.23805	0.224451
A7KAX9-2;A7KAX9;G3V174	600;949;875	A7KAX9-2	Rho GTPase-activating protein 32	ARHGAP32	0	NaN	ASSSTWDKCVEERDATNRSPTQIVKMKTNET		NaN	NaN	0.55768	NaN	NaN	NaN	T	2	0.585163	0.0314655	76.82	1.80212	0	0.55768
Q9NRY4	985	Q9NRY4	Rho GTPase-activating protein 35	ARHGAP35	0	NaN	SPRAGSPLCNSNLQDSEEDIEPSYSLFREDT	2	NaN	0.0791561	NaN	0.0340749	NaN	NaN	S	3	0.992238	0.00143399	57.934	22.1745	0	NaN
Q9NRY4	589	Q9NRY4	Rho GTPase-activating protein 35	ARHGAP35	0.866122	2.98665	ISSRFIRPSDRNQKNSLSDPNIDRINLVILG	1	3.71425	0.0791561	2.37228	0.0340749	3.63509	2.33821	S	2	0.999752	0.00264734	98.582	36.0475	0.859643	3.04326
Q9NRY4	1150	Q9NRY4	Rho GTPase-activating protein 35	ARHGAP35	0	1.88794	DSEMDTSSLERGRKVSIVSKPVLYRTRCTRL	1	1.9671	0.0791561	NaN	0.0340749	1.88794	NaN	S	3	0.999742	0.000559003	125.5	35.876	0	1.96709
Q9NRY4	1134	Q9NRY4	Rho GTPase-activating protein 35	ARHGAP35	2.33662	0.966272	IRNINKAQSNGSGNGSDSEMDTSSLERGRKV	1	1.03844	0.0791561	1.00734	0.0340749	0.95928	0.973264	S	2	0.987059	3.54e-06	220.95	18.8403	2.01429	1.02289
Q9NRY4	1179	Q9NRY4	Rho GTPase-activating protein 35	ARHGAP35	0.702389	-0.187892	RLGRFASYRTSFSVGSDDELGPIRKKEEDQA	1	-0.169274	0.0791561	-0.0932787	0.0340749	-0.24843	-0.127354	S	2	0.997523	9.13e-05	193.19	26.0507	0.746258	-0.131276
Q9NRY4	975	Q9NRY4	Rho GTPase-activating protein 35	ARHGAP35	0.618671	-0.274902	ACSTTEEVFNSPRAGSPLCNSNLQDSEEDIE	1;2	-0.304897	0.0791561	-0.131677	0.0340749	-0.384053	-0.165752	S	3	0.999575	1.72e-05	95.435	33.7105	0.618949	-0.218287
Q9NRY4	970	Q9NRY4	Rho GTPase-activating protein 35	ARHGAP35	0.494043	-0.383529	DNAAEACSTTEEVFNSPRAGSPLCNSNLQDS	1	-0.515687	0.0791561	-0.13814	0.0340749	-0.594843	-0.172215	S	3	1	5.12e-19	219.77	77.2936	0.477064	-0.326913
Q9C0H5;Q9C0H5-2	604;604	Q9C0H5	Rho GTPase-activating protein 39	ARHGAP39	0	NaN	GALPLPMPGPVVRAFSEDEALAQQENRHWRR	1	-0.0890525	NaN	0.028852	NaN	NaN	NaN	S	2	1	0.000159087	207.92	126.264	0.155235	-0.0301002
Q9C0H5;Q9C0H5-2	122;122	Q9C0H5	Rho GTPase-activating protein 39	ARHGAP39	0	NaN	QTLKQNTESPRASAESSPGRGSSVSREGSTS	1	-0.935007	NaN	NaN	NaN	NaN	NaN	S	2	0.5	0.0248888	67.08	0	0	-0.935007
Q9C0H5;Q9C0H5-2	123;123	Q9C0H5	Rho GTPase-activating protein 39	ARHGAP39	0	NaN	TLKQNTESPRASAESSPGRGSSVSREGSTSS	1	-0.935007	NaN	NaN	NaN	NaN	NaN	S	2	0.5	0.0248888	67.08	0	0	-0.935007
Q9C0H5;Q9C0H5-2	299;299	Q9C0H5	Rho GTPase-activating protein 39	ARHGAP39	0	NaN	SSSPLLAQPRKPSGDSQPSSPRYGYEPPLYE	2	NaN	NaN	NaN	NaN	NaN	NaN	S	2	0.999955	0.000395726	176.87	42.5334	0	NaN
Q9C0H5;Q9C0H5-2	302;302	Q9C0H5	Rho GTPase-activating protein 39	ARHGAP39	0	NaN	PLLAQPRKPSGDSQPSSPRYGYEPPLYEEPP	2	NaN	NaN	NaN	NaN	NaN	NaN	S	2	0.541531	0.000800276	115.2	0	0	NaN
Q9C0H5;Q9C0H5-2	303;303	Q9C0H5	Rho GTPase-activating protein 39	ARHGAP39	0	NaN	LLAQPRKPSGDSQPSSPRYGYEPPLYEEPPV	2	NaN	NaN	NaN	NaN	NaN	NaN	S	2	0.771179	0.000395726	176.87	5.27636	0	NaN
Q9C0H5;Q9C0H5-2	690;690	Q9C0H5	Rho GTPase-activating protein 39	ARHGAP39	0	NaN	SSSCVFPTFTLRKPSSETDIENWASKHFNKH	1	-0.305557	NaN	NaN	NaN	NaN	NaN	S	2	0.75473	2.26e-12	314.11	4.88146	0	-0.305557
Q9C0H5;Q9C0H5-2	366;366	Q9C0H5	Rho GTPase-activating protein 39	ARHGAP39	0	NaN	RKPRPFLQPNKQGPPSPCQQLVLTKQKCPER	1	0.171975	NaN	0.100305	NaN	NaN	NaN	S	2	1	0.00028247	188.98	126.274	0.785537	0.13614
Q9C0H5;Q9C0H5-2	406;406	Q9C0H5	Rho GTPase-activating protein 39	ARHGAP39	0	NaN	GKEYVRQLVYVEQAGSSPKLRAGPRHKYAPN	1	NaN	NaN	-1.03304	NaN	NaN	NaN	S	2	0.622201	0.00331686	80.411	2.16671	0	-1.03304
Q9C0H5;Q9C0H5-2	284;284	Q9C0H5	Rho GTPase-activating protein 39	ARHGAP39	0	NaN	ERRPSPFLKRAELPGSSSPLLAQPRKPSGDS		NaN	NaN	NaN	NaN	NaN	NaN	S	2	0.400272	0.0219183	43.463	1.25431	0	NaN
Q9C0H5;Q9C0H5-2	286;286	Q9C0H5	Rho GTPase-activating protein 39	ARHGAP39	0	NaN	RPSPFLKRAELPGSSSPLLAQPRKPSGDSQP	1	-0.132167	NaN	-0.349309	NaN	NaN	NaN	S	3	0.937101	0.000104514	146.34	11.8009	0.569082	-0.240738
Q9C0H5;Q9C0H5-2	246;246	Q9C0H5	Rho GTPase-activating protein 39	ARHGAP39	0	NaN	GYAPDGPPGVRSRRPSGSQHSPSLQTFAPEA	1;2	NaN	NaN	-1.23314	NaN	NaN	NaN	S	3	0.73054	1.05e-08	159.04	4.26097	0	-1.23314
Q9C0H5;Q9C0H5-2	251;251	Q9C0H5	Rho GTPase-activating protein 39	ARHGAP39	0	NaN	GPPGVRSRRPSGSQHSPSLQTFAPEADGTIF	2	NaN	NaN	NaN	NaN	NaN	NaN	S	3	0.921481	2.89e-05	97.08	11.5966	0	NaN
A6NCP5;Q17R89	803;809	A6NCP5	Rho GTPase-activating protein 44	ARHGAP44	0	NaN	PLEHMRRHSVTDKRDSEEESESTAL______	1	NaN	NaN	0.157949	NaN	NaN	NaN	S	2	0.990663	0.0346025	51.771	20.2925	0	0.157949
Q13017-2;Q13017;H0YK04	1173;1173;51	Q13017-2	Rho GTPase-activating protein 5	ARHGAP5	0	NaN	KTLFSKAKSYYRRTHSDASDDEAFTTSKTKR	2	NaN	-0.0540927	NaN	-0.292263	NaN	NaN	S	2	0.999997	2.53e-10	284.63	54.7138	0	NaN
Q13017-2;Q13017	968;968	Q13017-2	Rho GTPase-activating protein 5	ARHGAP5	0.0981336	0.458102	NTRESTHQSEDVFLPSPRDCFPYNNYPDSDD	1	-0.989105	-0.0540927	1.55895	-0.292263	-0.935013	1.85122	S	2	1	0.000301131	141.93	96.5867	0.0655363	0.284924
Q13017-2;Q13017;H0YK04	1218;1218;96	Q13017-2	Rho GTPase-activating protein 5	ARHGAP5	0.566126	0.261727	PVETWKGGIDNPAITSDQELDDKKMKKKTHK	1	0.0886844	-0.0540927	0.088413	-0.292263	0.142777	0.380676	S	2	0.999769	4.7e-10	254.72	36.3583	3.01072	0.0885487
Q13017-2;Q13017;H0YK04	1217;1217;95	Q13017-2	Rho GTPase-activating protein 5	ARHGAP5	0	0.137476	SPVETWKGGIDNPAITSDQELDDKKMKKKTH	1	0.0833836	-0.0540927	NaN	-0.292263	0.137476	NaN	T	2	0.59666	0.023986	43.349	1.70055	0	0.0833836
Q13017-2;Q13017;H0YK04	1202;1202;80	Q13017-2	Rho GTPase-activating protein 5	ARHGAP5	0.718004	-0.645905	KRKGRHRGSEEDPLLSPVETWKGGIDNPAIT	1	-0.900287	-0.0540927	-0.73788	-0.292263	-0.846195	-0.445616	S	2	0.995941	0.00132286	116.13	23.8977	1.20129	-0.819083
Q13017-2;Q13017;H0YK04	1176;1176;54	Q13017-2	Rho GTPase-activating protein 5	ARHGAP5	2.43049	-1.33693	FSKAKSYYRRTHSDASDDEAFTTSKTKRKGR	1;2	-1.39882	-0.0540927	-1.6214	-0.292263	-1.34472	-1.32914	S	2	1	2.53e-10	284.63	86.898	1.32945	-1.51011
B7Z8H7;H7BYE6;B4DN07;O43182-5;O43182-3;O43182-2;O43182-4;O43182	393;420;409;381;616;584;381;584	B7Z8H7	Rho GTPase-activating protein 6	ARHGAP6	0	NaN	SDKEFSVQSSARAEESTAIIAVVQKMIENYE	2	NaN	NaN	NaN	NaN	NaN	NaN	S	3	1	0.0652869	50.305	50.305	0	NaN
B7Z8H7;H7BYE6;B4DN07;O43182-5;O43182-3;O43182-2;O43182-4;O43182	394;421;410;382;617;585;382;585	B7Z8H7	Rho GTPase-activating protein 6	ARHGAP6	0	NaN	DKEFSVQSSARAEESTAIIAVVQKMIENYEA	2	NaN	NaN	NaN	NaN	NaN	NaN	T	3	1	0.0652869	50.305	50.305	0	NaN
P52565;J3KTF8;J3QQX2;J3KRY1;P52565-2;J3KRE2;J3KS60	24;24;24;24;24;24;24	P52565	Rho GDP-dissociation inhibitor 1	ARHGDIA	0.878727	-0.519228	EQLAQIAAENEEDEHSVNYKPPAQKSIQEIQ	1	-0.411752	-0.00193447	-0.658447	-0.029809	-0.409817	-0.628638	S	3	1	6.42e-34	266.37	132.192	0.840945	-0.535099
M0QZR4;Q92888;Q92888-3;Q92888-2	919;863;878;830	M0QZR4	Rho guanine nucleotide exchange factor 1	ARHGEF1	1.57026	2.17294	GPPRDGDGVPGGGPLSPARTQEIQENLLSLE	1	1.89925	-0.18182	2.01568	-0.249136	2.08107	2.26481	S	2	1	0.0459942	41.905	41.9052	1.72293	1.95746
M0QZR4;Q92888;Q92888-3;Q92888-2;Q6NX52;M0QYC1;M0R2C7	842;786;801;753;768;544;212	M0QZR4	Rho guanine nucleotide exchange factor 1	ARHGEF1	0	1.75767	PKPRPSPSSTREPLLSSSENGNGGRETSPAD	1	1.57584	-0.18182	NaN	-0.249136	1.75767	NaN	S	2	0.712837	0.00324708	81.656	4.297	0	1.57584
M0QZR4;Q92888;Q92888-3;Q92888-2;Q6NX52	10;10;25;10;25	M0QZR4	Rho guanine nucleotide exchange factor 1	ARHGEF1	0.903641	-0.700614	______MEDFARGAASPGPSRPGLVPVSIIG	1	-0.743255	-0.18182	-1.08893	-0.249136	-0.561435	-0.839794	S	2	0.998327	0.0343468	50.786	27.7585	0.925497	-0.916092
M0QZR4;Q92888;Q92888-3;Q92888-2;Q6NX52;M0QYC1	832;776;791;743;758;534	M0QZR4	Rho guanine nucleotide exchange factor 1	ARHGEF1	0.28655	-1.79233	SLKVPAPASRPKPRPSPSSTREPLLSSSENG	1	-0.0837374	-0.18182	-3.93188	-0.249136	0.0980828	-3.68274	S	2	0.963589	0.039859	74.216	14.2803	0.312967	-2.00781
H0YAN8;O15013-7;O15013-4;O15013-5;O15013-6;O15013	903;1221;1255;1259;1283;1284	H0YAN8	Rho guanine nucleotide exchange factor 10	ARHGEF10	0	NaN	GDSLGSMTQKSDLSSSSGSLSLSHGSSSLEH	1;2	NaN	NaN	-0.347454	NaN	NaN	NaN	S	3	0.801077	4.56e-05	130.25	6.39153	0	-0.347454
H0YAN8;O15013-7;O15013-4;O15013-5;O15013-6;O15013	906;1224;1258;1262;1286;1287	H0YAN8	Rho guanine nucleotide exchange factor 10	ARHGEF10	0	NaN	LGSMTQKSDLSSSSGSLSLSHGSSSLEHRSE	2	NaN	NaN	NaN	NaN	NaN	NaN	S	3	0.869193	4.56e-05	130.25	9.14406	0	NaN
H0YAN8;O15013-7;O15013-4;O15013-5;O15013-6;O15013;E9PB39	27;316;379;354;379;379;340	H0YAN8	Rho guanine nucleotide exchange factor 10	ARHGEF10	0	NaN	TRAAVKRGRSFIRTKSLIAQDHRSSLEEEQN	1	0.499374	NaN	1.01049	NaN	NaN	NaN	S	2	1	0.00547934	130.01	91.7011	0.682355	0.754934
O15085;O15085-2	556;596	O15085	Rho guanine nucleotide exchange factor 11	ARHGEF11	1.76936	0.79205	GKPKSSSQSTFHIPLSPVEVKPGNVRNIIQH	1	0.691713	-0.121502	0.62686	-0.144026	0.813215	0.770886	S	3	0.999992	1.32e-06	156.2	52.0552	1.50464	0.659286
O15085;O15085-2;F8W8P9	1295;1335;711	O15085	Rho guanine nucleotide exchange factor 11	ARHGEF11	1.71135	0.612596	MGLCSLEHLPPRTRNSGIWESPELDRNLAED	1	0.472384	-0.121502	0.487281	-0.144026	0.593886	0.631307	S	2	0.999708	0.00113138	127.01	35.3857	2.00518	0.479832
O15085;O15085-2;F8W8P9	1292;1332;708	O15085	Rho guanine nucleotide exchange factor 11	ARHGEF11	0	0.420395	QEDMGLCSLEHLPPRTRNSGIWESPELDRNL	1	0.298893	-0.121502	NaN	-0.144026	0.420395	NaN	T	3	0.499998	0.00113138	73.76	0	0	0.298893
O15085;O15085-2;F8W8P9	635;675;51	O15085	Rho guanine nucleotide exchange factor 11	ARHGEF11	0.344953	0.402504	EMKRSRKAENVPRSRSDVDMDAAAEATRLHQ	1	0.62686	-0.121502	-0.0873808	-0.144026	0.748362	0.0566454	S	2	0.994574	0.00506058	104.52	22.6312	0.230495	0.269739
O15085;O15085-2;F8W8P9	1458;1498;874	O15085	Rho guanine nucleotide exchange factor 11	ARHGEF11	0.478248	-0.101901	ELAHRELLKSLGGESSGGTTPVGSFHTEAAR	1	-0.164755	-0.121502	-0.304576	-0.144026	-0.0432528	-0.16055	S	3	0.859222	3.41e-05	110.78	9.07209	0.734406	-0.234666
O15085;O15085-2	271;311	O15085	Rho guanine nucleotide exchange factor 11	ARHGEF11	0.275122	-0.601726	PVIMARVAQHHRRQGSDAAVPSTGDQGVDQS	1	-1.38605	-0.121502	-0.0829273	-0.144026	-1.26455	0.0610989	S	2	1	9.49e-05	134.45	95.6342	0.335399	-0.73449
Q9NZN5	41	Q9NZN5	Rho guanine nucleotide exchange factor 12	ARHGEF12	0	NaN	RESPTDKKQKVERIASHDFDPTDSSSKKTKS	1	1.08079	NaN	1.56423	NaN	NaN	NaN	S	2	1	0.00127076	122.45	63.7619	0.938977	1.32251
Q9NZN5;Q9NZN5-2;E9PMR6	337;318;234	Q9NZN5;Q9NZN5-2	Rho guanine nucleotide exchange factor 12	ARHGEF12	0	NaN	ENPEKSETIQDTDTQSLVGSPSTRIAPHIIG	2	NaN	0.121281	NaN	0.449324	NaN	NaN	S	2	0.999398	9.75e-09	226.33	32.2622	0	NaN
Q9NZN5;Q9NZN5-2;E9PMR6	703;684;600	Q9NZN5;Q9NZN5-2	Rho guanine nucleotide exchange factor 12	ARHGEF12	0	2.07115	KQVGETSAPGDTLDGTPRTLNTVFDFPPPPL	1	NaN	0.121281	2.52047	0.449324	NaN	2.07115	T	2	0.92388	0.000720016	105.46	10.9548	0	2.52047
Q9NZN5;Q9NZN5-2;E9PMR6	190;171;87	Q9NZN5;Q9NZN5-2	Rho guanine nucleotide exchange factor 12	ARHGEF12	1.11157	1.37699	SPHSPGASGNMERITSPVLMGEENNVVHNQK	1	1.66639	0.121281	1.65819	0.449324	1.54511	1.20887	S	3	0.999821	1.03e-11	257.72	37.4776	2.80381	1.66229
Q9NZN5;Q9NZN5-2;E9PMR6	341;322;238	Q9NZN5;Q9NZN5-2	Rho guanine nucleotide exchange factor 12	ARHGEF12	0.810042	1.05923	KSETIQDTDTQSLVGSPSTRIAPHIIGAEDD	1;2	1.44339	0.121281	1.24568	0.449324	1.32211	0.796354	S	2	0.796037	1.07e-15	293.88	8.92412	1.33046	1.34454
Q9NZN5;Q9NZN5-2;E9PMR6	1327;1308;1224	Q9NZN5;Q9NZN5-2	Rho guanine nucleotide exchange factor 12	ARHGEF12	0	0.84419	HMPFRTGTGDIATCYSPRTSTESFAPRDSVG	1	0.96547	0.121281	NaN	0.449324	0.84419	NaN	S	2	0.96363	0.000388645	126.01	14.2331	0	0.96547
Q9NZN5-2	41	Q9NZN5-2	Rho guanine nucleotide exchange factor 12	ARHGEF12	1.09084	0.83625	RESPTDKKQKVERIASHDFDPTGLVQRCVII	1	1.06468	0.121281	1.17843	0.449324	0.943395	0.729104	S	2	1	0.000187981	145.94	76.8217	1.49138	1.12155
Q9NZN5;Q9NZN5-2;E9PMR6	1176;1157;1073	Q9NZN5;Q9NZN5-2	Rho guanine nucleotide exchange factor 12	ARHGEF12	0.483432	0.383281	KLKEEQHGISVTGLQSPDRDLGLESTLISSK	1	0.287118	0.121281	1.05005	0.449324	0.165837	0.600725	S	3	1	5.54e-07	241.25	63.8218	0.48138	0.668583
Q9NZN5;Q9NZN5-2;E9PMR6	309;290;206	Q9NZN5;Q9NZN5-2	Rho guanine nucleotide exchange factor 12	ARHGEF12	1.02905	0.290349	CSSGDASRPSSDNADSPKSGPKERIYLEENP	1	0.454597	0.121281	0.696706	0.449324	0.333316	0.247383	S	2	1	5.52e-19	287.09	111.1	0.879581	0.575652
Q9NZN5;Q9NZN5-2;E9PMR6	637;618;534	Q9NZN5;Q9NZN5-2	Rho guanine nucleotide exchange factor 12	ARHGEF12	1.37212	0.26413	QKARHPKHLSTPSSVSPEPQDSAKLRQSGLA	1	0.40305	0.121281	0.695816	0.449324	0.281769	0.246492	S	2	0.999923	8.59e-12	268.61	41.245	0.780516	0.549433
Q9NZN5;Q9NZN5-2;E9PMR6	1288;1269;1185	Q9NZN5;Q9NZN5-2	Rho guanine nucleotide exchange factor 12	ARHGEF12	0.120535	0.0300767	SVQEDWQHFPRYRTASQGPQTDSVIQNSENI	1	0.226509	0.121281	0.404249	0.449324	0.105228	-0.0450744	S	2	0.999159	3.82e-19	315.39	30.7461	0.757313	0.315379
Q9NZN5;Q9NZN5-2	22;22	Q9NZN5;Q9NZN5-2	Rho guanine nucleotide exchange factor 12	ARHGEF12	0.706175	-0.202788	TITDRFPLKKPIRHGSILNRESPTDKKQKVE	1	-0.0167747	0.121281	0.181802	0.449324	-0.138055	-0.267521	S	2	1	0.010641	134.26	72.23	0.252919	0.0825138
Q5VV41	174	Q5VV41	Rho guanine nucleotide exchange factor 16	ARHGEF16	0	NaN	KGLGKPGGQGDAIQLSPKLQALAEEPSQPHT	1	0.843582	NaN	2.53712	NaN	NaN	NaN	S	2	1	0.000188796	182.19	86.213	0.529226	1.69035
Q5VV41	230	Q5VV41	Rho guanine nucleotide exchange factor 16	ARHGEF16	0	NaN	LYQEIQERGLNTSQESDDDILDESSSPEGTQ	1	0.223175	NaN	0.222928	NaN	NaN	NaN	S	2	0.999879	3.07e-08	175.72	39.8167	3.45244	0.223052
Q5VV41	107	Q5VV41	Rho guanine nucleotide exchange factor 16	ARHGEF16	0	NaN	SLAVASKAKTPARHQSFGAAVLSREAARRDP	1	0.188401	NaN	0.0423642	NaN	NaN	NaN	S	2	1	0.00161222	177.64	97.5324	0.444675	0.115383
Q5VV41	191	Q5VV41	Rho guanine nucleotide exchange factor 16	ARHGEF16	0	NaN	KLQALAEEPSQPHTRSPAKNKKTLGRKRGHK	1	-0.630796	NaN	NaN	NaN	NaN	NaN	S	3	0.658944	1.01e-06	228.6	2.86025	0	-0.630796
Q5VV41;B4DJM7;Q5VV41-2	576;280;288	Q5VV41	Rho guanine nucleotide exchange factor 16	ARHGEF16	0	NaN	KIEPSELPLPGGGNRSSSVPHPFQVTLLRNS		NaN	NaN	NaN	NaN	NaN	NaN	S	2	0.443879	0.00118645	129.11	0	0	NaN
Q5VV41;B4DJM7;Q5VV41-2	577;281;289	Q5VV41	Rho guanine nucleotide exchange factor 16	ARHGEF16	0	NaN	IEPSELPLPGGGNRSSSVPHPFQVTLLRNSE	1	0.675455	NaN	0.623586	NaN	NaN	NaN	S	3	0.835138	0.000168235	155.1	7.45797	1.59507	0.64952
Q5VV41;B4DJM7;Q5VV41-2	578;282;290	Q5VV41	Rho guanine nucleotide exchange factor 16	ARHGEF16	0	NaN	EPSELPLPGGGNRSSSVPHPFQVTLLRNSEG		NaN	NaN	NaN	NaN	NaN	NaN	S	2	0.371915	0.0209035	50.077	0.73459	0	NaN
Q96PE2	1961	Q96PE2	Rho guanine nucleotide exchange factor 17	ARHGEF17	0	NaN	MPTSPGTVSCPRAPLSPTGLGQGHTGHVRFL	1	NaN	NaN	2.38629	NaN	NaN	NaN	S	3	0.977022	0.0042521	65.887	16.2952	0	2.38629
M0QZS0;Q6ZSZ5-2;Q6ZSZ5;M0R150	740;943;1101;1059	M0QZS0	Rho guanine nucleotide exchange factor 18	ARHGEF18	0	NaN	NKLMGKDESTSRNRRSLSPILPGRHSPAPPP	2	NaN	-0.0332151	NaN	0.383165	NaN	NaN	S	2	1	0.00871764	66.393	66.3926	0	NaN
M0QZS0;Q6ZSZ5-2;Q6ZSZ5	799;1002;1160	M0QZS0	Rho guanine nucleotide exchange factor 18	ARHGEF18	1.88237	2.31773	LPGPPAPSPLPATPLSAKEDASKEDVIFF__	1	2.33225	-0.0332151	2.65315	0.383165	2.36546	2.26999	S	2	0.928038	8.74e-05	134.45	11.1082	1.38805	2.4927
M0QZS0;Q6ZSZ5-2;Q6ZSZ5;M0R150	378;575;733;691	M0QZS0	Rho guanine nucleotide exchange factor 18	ARHGEF18	0.289237	0.210903	PPRRAETFAGYDCTNSPTKNGSFKKKVSSTD	1	0.397913	-0.0332151	0.373843	0.383165	0.431128	-0.0093222	S	2	0.999845	2.28e-11	296.41	38.1043	1.70227	0.385878
M0QZS0;Q6ZSZ5-2;Q6ZSZ5;M0R150	742;945;1103;1061	M0QZS0	Rho guanine nucleotide exchange factor 18	ARHGEF18	0	0.00587842	LMGKDESTSRNRRSLSPILPGRHSPAPPPDP	1;2	-0.0273367	-0.0332151	NaN	0.383165	0.00587842	NaN	S	2	1	0.00376792	115	66.3926	0	-0.0273367
M0QZS0;Q6ZSZ5-2;Q6ZSZ5;M0R150	405;602;760;718	M0QZS0	Rho guanine nucleotide exchange factor 18	ARHGEF18	0	-0.353197	SSTDPRPRDWRGPPNSPDLKLSDSDIPGSSE	1	-0.386412	-0.0332151	NaN	0.383165	-0.353197	NaN	S	2	1	0.00209083	111.52	92.2953	0	-0.386412
Q5VY93;V9GYM8;Q92974-3;Q92974-2;Q92974;V9GZ14;V9GYF5;V9GYG5	178;222;150;177;177;150;169;150	Q5VY93	Rho guanine nucleotide exchange factor 2	ARHGEF2	0	NaN	ESPLGLRRILSQSTDSLNMRNRTLSVESLID	2	NaN	0.239887	NaN	0.317188	NaN	NaN	S	2	0.997389	0.000290573	157.47	25.628	0	NaN
Q5VY93;V9GYM8;Q92974-3;Q92974-2;Q92974;V9GYF0	953;997;924;951;952;219	Q5VY93	Rho guanine nucleotide exchange factor 2	ARHGEF2	0	NaN	LQDSSDPDTGSEEEGSSRLSPPHSPRDFTRM		NaN	0.239887	NaN	0.317188	NaN	NaN	S	3	0.27448	0.000278848	59.048	0	0	NaN
Q5VY93;V9GYM8;Q92974-3;Q92974-2;Q92974;V9GYF0	954;998;925;952;953;220	Q5VY93	Rho guanine nucleotide exchange factor 2	ARHGEF2	0	NaN	QDSSDPDTGSEEEGSSRLSPPHSPRDFTRMQ		NaN	0.239887	NaN	0.317188	NaN	NaN	S	3	0.27448	0.000278848	59.048	0	0	NaN
Q5VY93;V9GYM8;Q92974-3;Q92974-2;Q92974;V9GYF0	957;1001;928;955;956;223	Q5VY93	Rho guanine nucleotide exchange factor 2	ARHGEF2	0	NaN	SDPDTGSEEEGSSRLSPPHSPRDFTRMQDIP	2	NaN	0.239887	NaN	0.317188	NaN	NaN	S	2	1	0.000278848	76.357	76.3572	0	NaN
Q5VY93;V9GYM8;Q92974-3;Q92974-2;Q92974;V9GYF0	961;1005;932;959;960;227	Q5VY93	Rho guanine nucleotide exchange factor 2	ARHGEF2	0	NaN	TGSEEEGSSRLSPPHSPRDFTRMQDIPEETE	2	NaN	0.239887	NaN	0.317188	NaN	NaN	S	2	1	0.0117538	76.357	76.3572	0	NaN
Q5VY93;V9GYM8;Q92974-3;Q92974-2;Q92974	649;693;620;647;648	Q5VY93	Rho guanine nucleotide exchange factor 2	ARHGEF2	0	NaN	LPTLPRGLFRSESLESPRGERLLQDAIREVE	2	NaN	0.239887	NaN	0.317188	NaN	NaN	S	2	1	0.000204953	170.22	127.702	0	NaN
Q5VY93;V9GYM8;Q92974-3;Q92974-2;Q92974;V9GZ14;V9GYF5;V9GYG5	153;197;125;152;152;125;144;125	Q5VY93	Rho guanine nucleotide exchange factor 2	ARHGEF2	0	NaN	SRRGRSSLSLAKSVSTTNIAGHFNDESPLGL		NaN	0.239887	NaN	0.317188	NaN	NaN	T	2	0.303858	0.00967088	59.359	0	0	NaN
Q5VY93;V9GYM8;Q92974-3;Q92974-2;Q92974;V9GZ14;V9GYF5;V9GYG5	154;198;126;153;153;126;145;126	Q5VY93	Rho guanine nucleotide exchange factor 2	ARHGEF2	0	NaN	RRGRSSLSLAKSVSTTNIAGHFNDESPLGLR		NaN	0.239887	NaN	0.317188	NaN	NaN	T	2	0.303858	0.00967088	59.359	0	0	NaN
Q5VY93;V9GYM8;Q92974-3;Q92974-2;Q92974	712;756;683;710;711	Q5VY93	Rho guanine nucleotide exchange factor 2	ARHGEF2	0	2.19569	SPGVTANGEARTFNGSIELCRADSDSSQRDR	1	2.43558	0.239887	NaN	0.317188	2.19569	NaN	S	2	1	0.00164195	107.93	72.2163	0	2.43558
Q5VY93;V9GYM8;Q92974-3;Q92974-2;Q92974	646;690;617;644;645	Q5VY93	Rho guanine nucleotide exchange factor 2	ARHGEF2	1.28143	1.24903	GMALPTLPRGLFRSESLESPRGERLLQDAIR	1;2	1.59177	0.239887	1.46336	0.317188	1.35189	1.14617	S	2	0.999991	0.000204953	170.22	50.3664	1.57279	1.52757
Q5VY93;V9GYM8;Q92974-3;Q92974-2;Q92974	697;741;668;695;696	Q5VY93	Rho guanine nucleotide exchange factor 2	ARHGEF2	2.20619	0.451134	REPALPLEPDSGGNTSPGVTANGEARTFNGS	1	0.686613	0.239887	0.77273	0.317188	0.446726	0.455542	S	2	0.909576	6.13e-05	121.49	11.1604	1.42569	0.729671
Q5VY93;V9GYM8;Q92974-3;Q92974-2;Q92974;V9GYF0	933;977;904;931;932;199	Q5VY93	Rho guanine nucleotide exchange factor 2	ARHGEF2	1.1214	0.424062	SVHRNFEDRERQELGSPEERLQDSSDPDTGS	1	0.613343	0.239887	0.791856	0.317188	0.373456	0.474668	S	2	1	0.000835261	194.29	194.29	1.09451	0.702599
Q5VY93;V9GYM8;Q92974-3;Q92974-2;Q92974;V9GZ14;V9GYF5;V9GYG5	175;219;147;174;174;147;166;147	Q5VY93	Rho guanine nucleotide exchange factor 2	ARHGEF2	1.6189	0.396823	FNDESPLGLRRILSQSTDSLNMRNRTLSVES	1;2	0.621712	0.239887	0.729009	0.317188	0.381825	0.411821	S	2	0.998024	0.000224819	249.58	27.0329	1.29701	0.67536
Q5VY93;V9GYM8;Q92974-3;Q92974-2;Q92974;V9GZ14;V9GYF5;V9GYG5	152;196;124;151;151;124;143;124	Q5VY93	Rho guanine nucleotide exchange factor 2	ARHGEF2	1.10198	0.266828	GSRRGRSSLSLAKSVSTTNIAGHFNDESPLG	1;2	0.540027	0.239887	0.550704	0.317188	0.30014	0.233515	S	2	0.981757	6.85e-29	338.11	17.3421	2.20542	0.545365
Q5VY93;V9GYM8;Q92974-3;Q92974-2;Q92974;V9GZ14;V9GYF5;V9GYG5	164;208;136;163;163;136;155;136	Q5VY93	Rho guanine nucleotide exchange factor 2	ARHGEF2	0.0055406	0.00431965	KSVSTTNIAGHFNDESPLGLRRILSQSTDSL	1;2	0.461109	0.239887	0.104605	0.317188	0.221223	-0.212583	S	3	1	5.56e-16	281.88	120.378	0.446137	0.282857
Q5VY93;V9GYM8;Q92974-3;Q92974-2;Q92974;V9GZ14;V9GYF5;V9GYG5	123;167;95;122;122;95;114;95	Q5VY93	Rho guanine nucleotide exchange factor 2	ARHGEF2	0	-0.293011	SVSLRSKTTIRERPSSAIYPSDSFRQSLLGS	1	NaN	0.239887	0.0241777	0.317188	NaN	-0.293011	S	2	0.789707	0.014151	75.682	5.7475	0	0.0241777
Q5VY93;V9GYM8;Q92974-3;Q92974-2;Q92974;V9GYF0	887;931;858;885;886;153	Q5VY93	Rho guanine nucleotide exchange factor 2	ARHGEF2	1.3135	-0.506458	AEAPWARRPVDPRRRSLPAGDALYLSFNPPQ	1	-0.227844	0.239887	-0.227996	0.317188	-0.467731	-0.545184	S	2	1	0.000196537	109.41	75.7031	3.6729	-0.22792
Q5VY93;V9GYM8;Q92974-3;Q92974-2;Q92974;V9GYF0	975;1019;946;973;974;251	Q5VY93	Rho guanine nucleotide exchange factor 2	ARHGEF2	0	-0.749727	HSPRDFTRMQDIPEETESRDGEAVASES___	1	-0.509841	0.239887	NaN	0.317188	-0.749727	NaN	T	2	0.81466	0.00299848	135.14	6.43008	0	-0.509841
Q96DR7-3;Q96DR7-4;Q96DR7	392;392;392	Q96DR7-3	Rho guanine nucleotide exchange factor 26	ARHGEF26	0	NaN	AVLYQNYKEKALDIDSDEESEPKEQKSDEKI	1	0.260267	NaN	1.02942	NaN	NaN	NaN	S	2	0.999866	0.00075323	163.41	38.7319	0.465532	0.644842
Q96DR7-3;Q96DR7-4;Q96DR7	222;222;222	Q96DR7-3	Rho guanine nucleotide exchange factor 26	ARHGEF26	0	NaN	QKSSSEQKLPLQRLPSQENELLENPSVVLST	1	0.264717	NaN	0.339594	NaN	NaN	NaN	S	3	0.999992	9.7e-05	68.434	51.4702	1.10524	0.302155
Q96DR7-3;Q96DR7-4;Q96DR7	80;80;80	Q96DR7-3	Rho guanine nucleotide exchange factor 26	ARHGEF26	0	NaN	PAQVPTASDSRTVHRSPLLLGAQRRAVANGG	1	0.525067	NaN	0.92448	NaN	NaN	NaN	S	2	1	0.0108611	70.942	70.9415	0.766575	0.724773
Q8TER5-4;Q8TER5;Q8TER5-3;G3V3N2;G3V5C1	419;419;419;419;419	Q8TER5-4	Rho guanine nucleotide exchange factor 40	ARHGEF40	0	NaN	DKEDASHQEALGNLPSPSEHKLPECHLVKEE	1	NaN	NaN	0.602362	NaN	NaN	NaN	S	3	0.832621	8.83e-05	101.53	6.96746	0	0.602362
Q8TER5-4;Q8TER5;Q8TER5-3;G3V3N2;G3V5C1;G3V485	401;401;401;401;401;401	Q8TER5-4	Rho guanine nucleotide exchange factor 40	ARHGEF40	0	NaN	AGRGALSRGGDSAPLSPGDKEDASHQEALGN	1	0.813525	NaN	0.827575	NaN	NaN	NaN	S	2	1	0.00119364	100.43	72.2844	2.26357	0.82055
Q8TER5-4;Q8TER5;Q8TER5-3;G3V3N2;G3V5C1;G3V485	262;262;262;262;262;262	Q8TER5-4	Rho guanine nucleotide exchange factor 40	ARHGEF40	0	NaN	EVTLPVRGSPTDAEGSPGLSRVRTVPTRKGA	1	-0.0477112	NaN	-0.665798	NaN	NaN	NaN	S	2	0.957195	0.00155588	103.88	13.4951	0.342507	-0.356755
Q15052-2;Q15052	71;225	Q15052-2	Rho guanine nucleotide exchange factor 6	ARHGEF6	0	NaN	PSNYVREIKSSERPLSPKAVKGFETAPLTKN	1	0.861558	NaN	NaN	NaN	NaN	NaN	S	2	0.999998	0.0214862	85.536	58.877	0	0.861558
B1ALK7;B7Z6G2;Q14155-1;Q14155-5;Q14155-6;Q14155-2;Q14155-3;Q14155;E9PDQ5	516;591;516;601;516;644;673;694;438	B1ALK7	Rho guanine nucleotide exchange factor 7	ARHGEF7	0.335748	1.36836	TMKKLLPKRKPERKPSDEEFASRKSTAALEE	1	2.7337	0.152897	0.364685	0.208767	2.5808	0.155918	S	2	1	0.00305826	133.87	102.994	0.381354	1.54919
B1ALK7;B7Z6G2;Q14155-1;Q14155-5	619;635;560;645	B1ALK7	Rho guanine nucleotide exchange factor 7	ARHGEF7	1.18486	0.74287	AHSYRMGSTSRSRKESAPQVLLPEEEKIIVE	1	0.81926	0.152897	1.02815	0.208767	0.666362	0.819378	S	2	1	0.00139689	94.234	94.2343	1.14461	0.923702
B1ALK7;B7Z6G2;Q14155-1;Q14155-5;Q14155-6;Q14155-2;Q14155-3;Q14155;E7EUY6;E7EU80	71;146;71;156;71;199;228;249;71;71	B1ALK7	Rho guanine nucleotide exchange factor 7	ARHGEF7	0.549587	0.667034	PSNYVREVKASEKPVSPKSGTLKSPPKGFDT	1	0.503349	0.152897	1.19238	0.208767	0.350452	0.983617	S	2	1	0.0101242	155.8	107.509	0.609583	0.847866
B1ALK7;B7Z6G2;Q14155-1;Q14155-5;Q14155-6;Q14155-2;Q14155-3;Q14155;E9PDQ5;Q15052-2;Q15052;B7Z3C7	525;600;525;610;525;653;682;703;447;495;649;522	B1ALK7;Q15052-2	Rho guanine nucleotide exchange factor 7;Rho guanine nucleotide exchange factor 6	ARHGEF7;ARHGEF6	0	0.399948	KPERKPSDEEFASRKSTAALEEDAQILKVIE;KTERKPSEEEYVIRKSTAALEEDAQILKVIE	1	NaN	0.152897	0.608715	0.208767	NaN	0.399948	S	2	0.5	0.0160891	55.097	0	0	0.608715
B1ALK7;B7Z6G2;Q14155-1;Q14155-5;Q14155-6;Q14155-2;Q14155-3;Q14155;E9PDQ5;Q15052-2;Q15052;B7Z3C7	526;601;526;611;526;654;683;704;448;496;650;523	B1ALK7;Q15052-2	Rho guanine nucleotide exchange factor 7;Rho guanine nucleotide exchange factor 6	ARHGEF7;ARHGEF6	0	0.399948	PERKPSDEEFASRKSTAALEEDAQILKVIEA;TERKPSEEEYVIRKSTAALEEDAQILKVIEA	1	NaN	0.152897	0.608715	0.208767	NaN	0.399948	T	2	0.5	0.0160891	55.097	0	0	0.608715
B1ALK7;B7Z6G2;Q14155-1;Q14155-5;Q14155-6;Q14155-2;Q14155-3;Q14155;E7EUY6;E9PDQ5;Q15052-2;Q15052;B7Z3C7	340;415;340;425;340;468;497;518;340;262;334;488;361	B1ALK7;Q15052-2	Rho guanine nucleotide exchange factor 7;Rho guanine nucleotide exchange factor 6	ARHGEF7;ARHGEF6	1.7073	0.305965	LFPNVLLMLSASPRMSGFIYQGKLPTTGMTI;LFSNVLIMLSASPRMSGFIYQGKIPIAGTVV	1	0.449429	0.152897	0.524164	0.208767	0.296532	0.315397	S	2	1	0.00141496	133.85	106.632	1.31183	0.486797
O14497;O14497-2;O14497-3	631;631;248	O14497	AT-rich interactive domain-containing protein 1A	ARID1A	0	NaN	PSMTSSKGGQEDMNLSLQSRPSSLPDLSGSI	2	NaN	-0.189203	NaN	-0.23382	NaN	NaN	S	2	1	0.0123916	53.453	53.4532	0	NaN
O14497;O14497-2;O14497-3	634;634;251	O14497	AT-rich interactive domain-containing protein 1A	ARID1A	0	NaN	TSSKGGQEDMNLSLQSRPSSLPDLSGSIDDL	2	NaN	-0.189203	NaN	-0.23382	NaN	NaN	S	2	1	0.0123916	53.453	53.4532	0	NaN
O14497;O14497-2;O14497-3	698;698;315	O14497	AT-rich interactive domain-containing protein 1A	ARID1A	0	NaN	PHTSPHLPGIRGPSPSPVGSPASVAQSRSGP	3	NaN	-0.189203	NaN	-0.23382	NaN	NaN	S	2	1	3.62e-05	159.76	93.3968	0	NaN
O14497;O14497-2;O14497-3	702;702;319	O14497	AT-rich interactive domain-containing protein 1A	ARID1A	0	NaN	PHLPGIRGPSPSPVGSPASVAQSRSGPLSPA	2;3	NaN	-0.189203	NaN	-0.23382	NaN	NaN	S	2	0.99977	1.49e-05	159.76	36.3911	0	NaN
O14497;O14497-2;O14497-3	763;763;380	O14497	AT-rich interactive domain-containing protein 1A	ARID1A	0	NaN	QDRGYMQRNPQMPQYSSPQPGSALSPRQPSG		NaN	-0.189203	NaN	-0.23382	NaN	NaN	S	2	0.493091	0.00418203	59.359	0	0	NaN
O14497;O14497-2;O14497-3	764;764;381	O14497	AT-rich interactive domain-containing protein 1A	ARID1A	0	NaN	DRGYMQRNPQMPQYSSPQPGSALSPRQPSGG		NaN	-0.189203	NaN	-0.23382	NaN	NaN	S	2	0.493091	0.00418203	59.359	0	0	NaN
O14497;O14497-2;O14497-3;H0Y488;H0YEW5	1600;1383;1217;497;53	O14497	AT-rich interactive domain-containing protein 1A	ARID1A	0	NaN	VSSPAPLPRPMENRTSPSKSPFLHSGMKMQK	2	NaN	-0.189203	NaN	-0.23382	NaN	NaN	S	2	0.55454	0.0037996	90.755	1.15142	0	NaN
O14497;O14497-2;O14497-3;H0Y488;H0YEW5	1604;1387;1221;501;57	O14497	AT-rich interactive domain-containing protein 1A	ARID1A	1.18348	1.32196	APLPRPMENRTSPSKSPFLHSGMKMQKAGPP	1;2	0.996172	-0.189203	1.22472	-0.23382	1.18538	1.45854	S	2	0.999999	0.00348793	125.72	61.0145	1.1852	1.11045
O14497;O14497-2	382;382	O14497	AT-rich interactive domain-containing protein 1A	ARID1A	1.75398	1.10112	SGGGGQPLARTPQPSSPMDQMGKMRPQPYGG	1	0.88143	-0.189203	0.897783	-0.23382	1.07063	1.1316	S	2	0.999291	0.000332079	190.36	31.492	2.23277	0.889606
O14497;O14497-2;O14497-3;H0Y488;Q96SM7	1754;1537;1371;651;82	O14497	AT-rich interactive domain-containing protein 1A	ARID1A	2.53213	1.06636	PGQRTLLDPGRFSKVSSPAPMEGGEEEEELL	1	0.872238	-0.189203	0.837459	-0.23382	1.06144	1.07128	S	3	0.5	1.05e-07	173.18	0	1.88778	0.854848
O14497;O14497-2;O14497-3;H0Y488;Q96SM7	1888;1671;1505;785;216	O14497	AT-rich interactive domain-containing protein 1A	ARID1A	1.35282	1.00083	PCPPAPRKHVTTAEGTPGTTDQEGPPPDGPP	1	0.741747	-0.189203	0.836894	-0.23382	0.930951	1.07071	T	3	0.996261	7.14e-15	218.22	25.7139	1.41654	0.789321
O14497;O14497-2;O14497-3;H0Y488;Q96SM7	1755;1538;1372;652;83	O14497	AT-rich interactive domain-containing protein 1A	ARID1A	2.6544	0.946937	GQRTLLDPGRFSKVSSPAPMEGGEEEEELLG	1	0.76103	-0.189203	0.70982	-0.23382	0.950233	0.94364	S	2	0.998775	7.57e-08	189.51	29.1136	1.65451	0.735425
O14497;O14497-2	301;301	O14497	AT-rich interactive domain-containing protein 1A	ARID1A	0	0.292734	TPQPTATPTLNQLLTSPSSARGYQGYPGGDY	1	0.103531	-0.189203	NaN	-0.23382	0.292734	NaN	S	3	0.73572	3.55e-06	124.83	6.11414	0	0.103531
O14497;O14497-2;O14497-3	696;696;313	O14497	AT-rich interactive domain-containing protein 1A	ARID1A	0.29762	0.272243	FSPHTSPHLPGIRGPSPSPVGSPASVAQSRS	1;2;3	-0.192596	-0.189203	0.314058	-0.23382	-0.0033924	0.547879	S	2	1	7.28e-08	229.98	82.9733	0.0704754	0.0607313
O14497;O14497-2	363;363	O14497	AT-rich interactive domain-containing protein 1A	ARID1A	0.938662	0.218585	AASGGAQQRSHHAPMSPGSSGGGGQPLARTP	1	-0.0105994	-0.189203	0.0247452	-0.23382	0.178604	0.258566	S	3	0.999991	1.18e-10	223.15	50.5163	0.120539	0.00707293
O14497;O14497-2;O14497-3	772;772;389	O14497	AT-rich interactive domain-containing protein 1A	ARID1A	0.456457	0.156263	PQMPQYSSPQPGSALSPRQPSGGQIHTGMGS	1	0.0626743	-0.189203	-0.173173	-0.23382	0.251877	0.0606475	S	3	0.997737	5.2e-05	119.87	26.4443	0.142024	-0.0552493
O14497;O14497-2;O14497-3;H0Y488	1184;1184;801;81	O14497	AT-rich interactive domain-containing protein 1A	ARID1A	0.0878842	0.0866572	PHSQIPPLPGMSRSNSVGIQDAFNDGSDSTF	1	-0.395321	-0.189203	0.145612	-0.23382	-0.206118	0.379433	S	2	0.999585	4.09e-31	311.27	33.8224	0.139857	-0.124855
O14497;O14497-2;O14497-3	769;769;386	O14497	AT-rich interactive domain-containing protein 1A	ARID1A	0.0100678	-0.00688429	QRNPQMPQYSSPQPGSALSPRQPSGGQIHTG	1;2	-0.387261	-0.189203	-0.0495316	-0.23382	-0.198057	0.184289	S	2	0.822457	0.000134564	135.64	7.35239	0.377771	-0.218396
O14497;O14497-2;O14497-3	604;604;221	O14497	AT-rich interactive domain-containing protein 1A	ARID1A	1.89432	-0.410711	QTAYSQQRFPPPQELSQDSFGSQASSAPSMT	1	-0.608144	-0.189203	-0.636302	-0.23382	-0.418941	-0.402481	S	3	0.994027	3.6e-06	136.34	22.2119	1.84158	-0.622223
F8WCU9;Q68CP9-3;Q68CP9;F8W108	1242;1391;1391;1001	F8WCU9	AT-rich interactive domain-containing protein 2	ARID2	1.1667	0.829192	IPNHKTSNHVGNGEISPMEPQGTLDITQQDT	1	0.734048	-0.00607205	0.762391	-0.155871	0.74012	0.918263	S	3	0.998914	5.21e-06	117.94	32.6497	1.91879	0.74822
F8WCU9;Q68CP9-3;Q68CP9;F8W108;F8VWP4	1321;1470;1470;1080;78	F8WCU9	AT-rich interactive domain-containing protein 2	ARID2	1.97456	0.533243	SLNSDVPQQRPSVVVSPHSTTSVIQGHQIIA	1	0.536053	-0.00607205	0.368489	-0.155871	0.542125	0.524361	S	3	0.981932	3.56e-11	171.69	20.5954	0.933263	0.452271
F8WCU9;Q68CP9-3;Q68CP9;F8W108;F8VWP4	1347;1496;1496;1106;104	F8WCU9	AT-rich interactive domain-containing protein 2	ARID2	0.342558	0.518636	HQIIAVPDSGSKVSHSPALSSDVRSTNGTAE	1	0.0633648	-0.00607205	0.811964	-0.155871	0.0694369	0.967836	S	2	0.997646	0.0019761	127.29	26.2779	0.346383	0.437664
Q99856	81	Q99856	AT-rich interactive domain-containing protein 3A	ARID3A	0	NaN	RAAAAGLGHPASPGGSEDGPPGSEEEDAARE	2	NaN	0.31742	NaN	0.113034	NaN	NaN	S	3	1	1.53e-17	202.88	92.5617	0	NaN
Q99856	88	Q99856	AT-rich interactive domain-containing protein 3A	ARID3A	0	NaN	GHPASPGGSEDGPPGSEEEDAAREGTPGSPG	2	NaN	0.31742	NaN	0.113034	NaN	NaN	S	3	1	5.57e-05	99.562	67.6747	0	NaN
Q99856	455	Q99856	AT-rich interactive domain-containing protein 3A	ARID3A	1.24046	4.813	AAQAAALEQLREKLESAEPPEKKMALVADEQ	1	4.69466	0.31742	5.3618	0.113034	4.37724	5.24877	S	2	1	0.0583524	42.21	42.2105	1.37498	5.02823
Q99856;K7EJ04	371;218	Q99856	AT-rich interactive domain-containing protein 3A	ARID3A	1.6946	1.13127	GSLFAYSPGGAHGMLSSPKLPVSSLGLAAST	1	1.4846	0.31742	1.20839	0.113034	1.16718	1.09536	S	3	0.634121	1.01e-08	179	2.38836	1.18663	1.3465
Q99856;K7EJ04	357;204	Q99856	AT-rich interactive domain-containing protein 3A	ARID3A	1.21489	0.971088	IDSNRREGRRQSFGGSLFAYSPGGAHGMLSS	1	1.19522	0.31742	1.17741	0.113034	0.877802	1.06437	S	3	0.516537	1.45e-06	146.1	0.287388	2.3206	1.18631
Q99856	101	Q99856	AT-rich interactive domain-containing protein 3A	ARID3A	0.299672	0.117423	PGSEEEDAAREGTPGSPGRGREGPGEEHFED	1	0.316841	0.31742	0.348459	0.113034	-0.000579	0.235425	S	2	0.999977	0.00368151	118.31	46.4156	1.51953	0.33265
Q99856	119	Q99856	AT-rich interactive domain-containing protein 3A	ARID3A	0.119925	-0.0539824	RGREGPGEEHFEDMASDEDMKPKWEEEEMEE	1	0.127897	0.31742	0.194591	0.113034	-0.189522	0.0815577	S	3	1	1.05e-22	304.96	174.282	0.886627	0.161244
Q99856	77	Q99856	AT-rich interactive domain-containing protein 3A	ARID3A	0.480428	-0.236607	LAAMRAAAAGLGHPASPGGSEDGPPGSEEED	1;2	-0.0545421	0.31742	0.0117819	0.113034	-0.371962	-0.101252	S	3	1	1.86e-29	254.94	84.5027	0.196926	-0.0213801
Q99856;K7EJ04	362;209	Q99856	AT-rich interactive domain-containing protein 3A	ARID3A	0.940077	-0.385718	REGRRQSFGGSLFAYSPGGAHGMLSSPKLPV	1	0.00201835	0.31742	-0.343	0.113034	-0.315401	-0.456034	S	3	0.999998	5.22e-09	185.68	56.7938	0.297788	-0.170491
Q8IVW6-4;Q8IVW6;Q8IVW6-3;H3BQ92	332;332;332;91	Q8IVW6-4	AT-rich interactive domain-containing protein 3B	ARID3B	0	NaN	AAIDGNRREGRRPSYSSSLFGYSPAAATAAA		NaN	0.458697	NaN	0.206393	NaN	NaN	S	3	0.263719	0.000464475	54.003	0	0	NaN
Q8IVW6-4;Q8IVW6;Q8IVW6-3;H3BQ92	333;333;333;92	Q8IVW6-4	AT-rich interactive domain-containing protein 3B	ARID3B	0	NaN	AIDGNRREGRRPSYSSSLFGYSPAAATAAAA		NaN	0.458697	NaN	0.206393	NaN	NaN	S	3	0.188667	0.000464475	54.003	0	0	NaN
Q8IVW6-4;Q8IVW6;Q8IVW6-3;H3BQ92	334;334;334;93	Q8IVW6-4	AT-rich interactive domain-containing protein 3B	ARID3B	0	NaN	IDGNRREGRRPSYSSSLFGYSPAAATAAAAA		NaN	0.458697	NaN	0.206393	NaN	NaN	S	3	0.188667	0.000464475	54.003	0	0	NaN
Q8IVW6-4;Q8IVW6;Q8IVW6-3;H3BQ92	311;311;311;70	Q8IVW6-4	AT-rich interactive domain-containing protein 3B	ARID3B	1.54126	1.88722	MKYLYAYECEKKALSSPAELQAAIDGNRREG	1	2.43122	0.458697	2.00831	0.206393	1.97253	1.80191	S	2	0.826138	0.000943331	117.37	6.76847	1.21851	2.21976
Q8IVW6-4;Q8IVW6;Q8IVW6-3;H3BQ92	310;310;310;69	Q8IVW6-4	AT-rich interactive domain-containing protein 3B	ARID3B	0	1.80191	YMKYLYAYECEKKALSSPAELQAAIDGNRRE	1	NaN	0.458697	2.00831	0.206393	NaN	1.80191	S	2	0.5	0.0179657	62.055	0	0	2.00831
Q8IVW6-4;Q8IVW6;Q8IVW6-3;H3BQ92	330;330;330;89	Q8IVW6-4	AT-rich interactive domain-containing protein 3B	ARID3B	0	1.53258	LQAAIDGNRREGRRPSYSSSLFGYSPAAATA	1	1.99128	0.458697	NaN	0.206393	1.53258	NaN	S	3	0.560068	2.9e-09	155.09	3.15621	0	1.99128
Q8IVW6-4;Q8IVW6;Q8IVW6-3	165;165;165	Q8IVW6-4	AT-rich interactive domain-containing protein 3B	ARID3B	0	0.880187	GQQAKEDHTKDASKASPSVSTAGQPNWNLDE	1	NaN	0.458697	1.08658	0.206393	NaN	0.880187	S	2	0.786435	0.000267497	118.51	5.66163	0	1.08658
Q8IVW6-4;Q8IVW6;Q8IVW6-3	167;167;167	Q8IVW6-4	AT-rich interactive domain-containing protein 3B	ARID3B	0	0.817085	QAKEDHTKDASKASPSVSTAGQPNWNLDEQL	1	1.27578	0.458697	NaN	0.206393	0.817085	NaN	S	3	0.57301	0.000106069	90.308	1.68173	0	1.27578
Q8IVW6-4;Q8IVW6;Q8IVW6-3	381;381;381	Q8IVW6-4	AT-rich interactive domain-containing protein 3B	ARID3B	0.939659	0.48158	GLGSSSGTNTSSPRISPATTLRKGDGAPVTT	1	0.852398	0.458697	0.775851	0.206393	0.393701	0.569458	S	2	0.998652	0.0592957	45.433	30.595	1.52423	0.814125
Q8IVW6-4;Q8IVW6	542;543	Q8IVW6-4	AT-rich interactive domain-containing protein 3B	ARID3B	0.0386713	-0.0286509	LGSSASSSSSSHCSPSPTSSRGTPSAEPSTS	1	0.217231	0.458697	0.390558	0.206393	-0.241466	0.184164	S	4	0.695404	1.64e-33	240.06	5.34465	0.752384	0.303894
P29374-3;P29374-2;P29374;H7C485	427;427;427;105	P29374-3	AT-rich interactive domain-containing protein 4A	ARID4A	0	NaN	HHEPKVKEEKKDLEESMEEALKLDQEMPLTE	1	NaN	NaN	-0.787767	NaN	NaN	NaN	S	2	1	0.0218978	59.227	59.2273	0	-0.787767
P29374-3;P29374-2;P29374;H7C485	863;863;863;541	P29374-3	AT-rich interactive domain-containing protein 4A	ARID4A	0	NaN	QCVKEKKLKRKILGQSSPEKKIRIENGMEMT	1	NaN	NaN	-0.632786	NaN	NaN	NaN	S	2	0.636847	0.0248888	67.08	2.43945	0	-0.632785
P29374-3;P29374-2;P29374;H7C485	864;864;864;542	P29374-3	AT-rich interactive domain-containing protein 4A	ARID4A	0	NaN	CVKEKKLKRKILGQSSPEKKIRIENGMEMTN	1	0.0227584	NaN	-0.803871	NaN	NaN	NaN	S	2	0.973459	0.00356687	122.7	15.644	0.285655	-0.390557
P29374-3;P29374-2;P29374;C9J1W3	147;147;147;110	P29374-3	AT-rich interactive domain-containing protein 4A	ARID4A	0	NaN	GTPVIAKKTNRGRRSSLPVTEDEKEEESSEE	2	NaN	NaN	NaN	NaN	NaN	NaN	S	2	0.805851	0.0197964	108.75	6.18119	0	NaN
P29374-3;P29374-2;P29374;C9J1W3	151;151;151;114	P29374-3	AT-rich interactive domain-containing protein 4A	ARID4A	0	NaN	IAKKTNRGRRSSLPVTEDEKEEESSEEEDED	2	NaN	NaN	NaN	NaN	NaN	NaN	T	2	0.999997	0.0197964	108.75	54.7504	0	NaN
Q4LE39-3;Q4LE39-2;Q4LE39;Q4LE39-4;H0Y7Y8;H7C5R6	790;704;790;471;190;104	Q4LE39-3	AT-rich interactive domain-containing protein 4B	ARID4B	0	NaN	VSKSPERLRKDIEVLSEDTDYEEDEVTKKRK	2	NaN	0.0885487	NaN	-0.0127228	NaN	NaN	S	2	1	7.7e-08	215.42	128.858	0	NaN
Q4LE39-3;Q4LE39-2;Q4LE39;Q4LE39-4;H0Y7Y8	666;580;666;347;66	Q4LE39-3	AT-rich interactive domain-containing protein 4B	ARID4B	0	NaN	KDEKYSPKNCKLRRLSKPPFQTNPSPEMVSK	2	NaN	0.0885487	NaN	-0.0127228	NaN	NaN	S	3	0.99932	0.000139203	102.72	31.6591	0	NaN
Q4LE39-3;Q4LE39-2;Q4LE39;Q4LE39-4;H0Y7Y8;H7C5R6	793;707;793;474;193;107	Q4LE39-3	AT-rich interactive domain-containing protein 4B	ARID4B	0	NaN	SPERLRKDIEVLSEDTDYEEDEVTKKRKDVK	2	NaN	0.0885487	NaN	-0.0127228	NaN	NaN	T	2	1	7.7e-08	215.42	105.389	0	NaN
Q4LE39-3;Q4LE39-2;Q4LE39	295;295;295	Q4LE39-3	AT-rich interactive domain-containing protein 4B	ARID4B	0.194351	-0.114226	EEEEEEDDEKEKEDNSSEEEEEIEPFPEERE	1	-0.205181	0.0885487	0.052555	-0.0127228	-0.293729	0.0652777	S	2	0.854063	0.00037471	84.166	7.67323	0.180699	-0.0763129
Q4LE39-3;Q4LE39-2;Q4LE39;Q4LE39-4;H0Y7Y8	675;589;675;356;75	Q4LE39-3	AT-rich interactive domain-containing protein 4B	ARID4B	1.68974	-0.174182	CKLRRLSKPPFQTNPSPEMVSKLDLTDAKNS	1;2	-0.0800421	0.0885487	-0.192497	-0.0127228	-0.168591	-0.179774	S	2	0.999777	1.21e-05	180.84	38.3044	0.603569	-0.136269
Q4LE39-3;Q4LE39-2;Q4LE39	296;296;296	Q4LE39-3	AT-rich interactive domain-containing protein 4B	ARID4B	0	-0.186112	EEEEEDDEKEKEDNSSEEEEEIEPFPEEREN	1	-0.0975636	0.0885487	NaN	-0.0127228	-0.186112	NaN	S	2	0.988966	2.76e-05	180.56	19.5245	0	-0.0975636
Q14865-2;Q14865;Q14865-3	21;264;264	Q14865-2	AT-rich interactive domain-containing protein 5B	ARID5B	0	NaN	KGRPRKKKPCPQRRDSFSGVKDSNNNSDGKA	1	0.887447	NaN	0.979806	NaN	NaN	NaN	S	2	0.939897	0.0192632	65.179	11.9418	1.5022	0.933627
Q14865-2;Q14865	296;539	Q14865-2	AT-rich interactive domain-containing protein 5B	ARID5B	0	NaN	SNSEKVAEEAGEKGPTPPLPSAPLAPEKDSA	1	0.321813	NaN	-0.0436608	NaN	NaN	NaN	T	2	0.999983	0.0015203	94.281	47.7381	0.232216	0.139076
O95376	353	O95376	E3 ubiquitin-protein ligase ARIH2	ARIH2	0.392666	-1.76782	YECSRYKENPDIVNQSQQAQAREALKKYLFY	1	-0.508958	-0.0463846	-3.09678	-0.0237097	-0.462573	-3.07307	S	2	1	1.07e-05	229.93	229.93	0.401978	-1.80287
P36404;V9GYD0;P36404-2	45;45;45	P36404	ADP-ribosylation factor-like protein 2	ARL2;ARL2-SNX15	0	0.738796	TTILKKFNGEDIDTISPTLGFNIKTLEHRGF	1	NaN	-0.175501	0.545079	-0.193717	NaN	0.738796	S	2	0.959417	0.000110759	151.89	13.7918	0	0.545079
Q9Y2Y0-2;Q9Y2Y0;H3BU49	140;151;111	Q9Y2Y0-2	ADP-ribosylation factor-like protein 2-binding protein	ARL2BP	0	NaN	GLDLSSGLVVTSLCKSSSLPASQNNLRH___		NaN	-0.18254	NaN	-0.234296	NaN	NaN	S	2	0.349837	0.0633642	40.941	0	0	NaN
Q9Y2Y0-2;Q9Y2Y0;H3BU49	141;152;112	Q9Y2Y0-2	ADP-ribosylation factor-like protein 2-binding protein	ARL2BP	0	NaN	LDLSSGLVVTSLCKSSSLPASQNNLRH____		NaN	-0.18254	NaN	-0.234296	NaN	NaN	S	2	0.349837	0.0633642	40.941	0	0	NaN
Q9Y2Y0-2;Q9Y2Y0;H3BU49	146;157;117	Q9Y2Y0-2	ADP-ribosylation factor-like protein 2-binding protein	ARL2BP	0.576441	-0.181599	GLVVTSLCKSSSLPASQNNLRH_________	1	-0.28379	-0.18254	-0.496244	-0.234296	-0.10125	-0.261949	S	2	0.993241	0.00127624	99.344	22.0818	0.771378	-0.390017
Q66PJ3	178	Q66PJ3	ADP-ribosylation factor-like protein 6-interacting protein 4	ARL6IP4	0	NaN	TSQGRKASTAPGAEASPSPCITERSKQKARR	1	0.175173	NaN	NaN	NaN	NaN	NaN	S	2	0.988512	0.000362705	101.75	19.4803	0	0.175173
H7BZV4;Q66PJ3-4;Q66PJ3-3;F8WEP2	42;164;164;41	H7BZV4	ADP-ribosylation factor-like protein 6-interacting protein 4	ARL6IP4	0	-0.365031	KKSRKDTSRNCSASTSQERSKQKARRRTRSS	1	0.0765591	0.44159	NaN	0.237686	-0.365031	NaN	S	2	0.961315	0.00075038	134.61	14.1519	0	0.0765591
H7BZV4;Q66PJ3-4;Q66PJ3-3;F5GYV5;F8WCT1;B3V0L1;Q66PJ3-2;F5H7X4;Q66PJ3	130;252;252;140;140;137;263;260;271	H7BZV4;Q66PJ3	ADP-ribosylation factor-like protein 6-interacting protein 4	ARL6IP4	0.800265	-0.424129	QVEALPGPSLDQWHRSAGEEEDGPVLTDEQK	1	-0.090296	0.44159	-0.0786856	0.237686	-0.531886	-0.316372	S	2	1	8.87e-11	291.18	90.1598	1.35979	-0.0844908
Q8N6S5	80	Q8N6S5	ADP-ribosylation factor-like protein 6-interacting protein 6	ARL6IP6	0	NaN	SEPRKRSVLPPDGNGSPVLPDKRNGIFPAAA	1	0.897473	NaN	NaN	NaN	NaN	NaN	S	2	0.99983	0.0154008	63.998	37.7065	0	0.897473
Q8N6S5	19	Q8N6S5	ADP-ribosylation factor-like protein 6-interacting protein 6	ARL6IP6	0	NaN	AESGWRSALRRRGPGTPGPVARPSYSSFTQG	1	0.0427844	NaN	0.542308	NaN	NaN	NaN	T	2	1	0.0111428	79.347	53.168	0.346904	0.292546
Q9NVT9;B4E2W7	246;144	Q9NVT9	Armadillo repeat-containing protein 1	ARMC1	0	0.151351	VEQNTELPDYLPEDESPTKEQDKAVSRVGSH	1	0.0460021	-0.105349	NaN	-0.230313	0.151351	NaN	S	3	0.716029	0.000193174	59.962	4.03117	0	0.0460021
Q8N2F6-3;Q8N2F6;H7BXQ8;C9J5N7	45;45;45;45	Q8N2F6-3	Armadillo repeat-containing protein 10	ARMC10	0	NaN	GRRRGDRELGIRSSKSAGALEEGTSEGQLCG	1	0.525969	NaN	-0.00336541	NaN	NaN	NaN	S	2	1	0.000611829	117.37	91.3853	0.297506	0.261302
Q8N2F6-4;Q8N2F6-2;Q8N2F6-6;Q8N2F6-5	45;45;45;45	Q8N2F6-4	Armadillo repeat-containing protein 10	ARMC10	2.30423	0.486859	GRRRGDRELGIRSSKSAEDLTDGSYDDVLNA	1	0.203013	-0.287642	0.344828	-0.138235	0.490655	0.483064	S	2	1	5.52e-13	243.72	89.8395	0.792482	0.273921
Q9UH62;H3BV87	61;61	Q9UH62	Armadillo repeat-containing X-linked protein 3	ARMCX3	0	NaN	VDDAGDCSGARYNDWSDDDDDSNESKSIVWY	1;2	NaN	0.0117819	NaN	-0.111165	NaN	NaN	S	2	1	2.54e-14	259.23	100.219	0	NaN
Q9UH62;H3BV87	67;67	Q9UH62	Armadillo repeat-containing X-linked protein 3	ARMCX3	0	NaN	CSGARYNDWSDDDDDSNESKSIVWYPPWARI	2	NaN	0.0117819	NaN	-0.111165	NaN	NaN	S	2	0.850795	1.08e-05	111.11	7.56032	0	NaN
Q9UH62;H3BV87	72;72	Q9UH62	Armadillo repeat-containing X-linked protein 3	ARMCX3	0	0.268224	YNDWSDDDDDSNESKSIVWYPPWARIGTEAG	1	0.280006	0.0117819	NaN	-0.111165	0.268224	NaN	S	2	0.999998	0.0276884	64.64	57.3775	0	0.280006
Q9UH62	110	Q9UH62	Armadillo repeat-containing X-linked protein 3	ARMCX3	0.0752557	0.0574713	RARATRARRAVQKRASPNSDDTVLSPQELQK	1	-0.155904	0.0117819	0.171463	-0.111165	-0.167685	0.282628	S	2	0.999752	1.99e-12	272.79	36.9776	0.0133335	0.00777969
P27540;P27540-3;F8WAP6;A6NGV6	77;68;77;77	P27540	Aryl hydrocarbon receptor nuclear translocator	ARNT	0	NaN	CDDDQMSNDKERFARSDDEQSSADKERLARE	1	-0.370545	NaN	0.113167	NaN	NaN	NaN	S	2	1	0.0030188	167.93	78.105	0.16197	-0.128689
Q92747;E9PF58;F8WFD3	2;2;2	Q92747	Actin-related protein 2/3 complex subunit 1A	ARPC1A	0	1.01108	______________MSLHQFLLEPITCHAWN	1	0.984188	-0.0268957	NaN	-0.0314004	1.01108	NaN	S	3	1	5.78e-05	147.25	114.894	0	0.984188
O15143	310	O15143	Actin-related protein 2/3 complex subunit 1B	ARPC1B	0	NaN	GLTARERFQNLDKKASSEGGTAAGAGLDSLH		NaN	0.0583859	NaN	0.154713	NaN	NaN	S	3	0.459577	9.59e-05	114.49	1.13942	0	NaN
O15143	311	O15143	Actin-related protein 2/3 complex subunit 1B	ARPC1B	0	NaN	LTARERFQNLDKKASSEGGTAAGAGLDSLHK		NaN	0.0583859	NaN	0.154713	NaN	NaN	S	3	0.451112	9.59e-05	114.49	0	0	NaN
Q9BPX5	64	Q9BPX5	Actin-related protein 2/3 complex subunit 5-like protein	ARPC5L	0.648541	0.221556	RQGDMLRAFHAALRNSPVNTKNQAVKERAQG	1	0.366924	0.063779	0.221444	0.081476	0.303145	0.139968	S	3	0.999949	0.00024081	138.77	42.8993	0.811591	0.294184
P56211;H3BMD8	23;42	P56211	cAMP-regulated phosphoprotein 19	ARPP19	0	NaN	AASAEEQKEMEDKVTSPEKAEEAKLKARYPH	1	0.536948	NaN	NaN	NaN	NaN	NaN	S	2	0.997904	0.0119854	234.09	26.777	0	0.536948
J3KPP7;P49407-2;P49407	412;404;412	J3KPP7	Beta-arrestin-1	ARRB1	0.214316	0.103545	KGMKDDKEEEEDGTGSPQLNNR_________	1	0.187894	0.231924	0.247927	-0.00319192	-0.0440295	0.251119	S	3	0.999978	1.68e-29	346.25	46.4868	1.05976	0.217911
Q5T370;Q8N5I2	256;292	Q5T370	Arrestin domain-containing protein 1	ARRDC1	0	0.319687	LPVFIGNIAVNHAPVSPRPGLGLPPGAPPLV	1	0.0526941	-0.266993	NaN	NaN	0.319687	NaN	S	3	1	7.01e-13	198.81	144.149	0	0.0526941
C9JJX6;E9PDC3;O00192-2;O00192	795;858;801;864	C9JJX6	Armadillo repeat protein deleted in velo-cardio-facial syndrome	ARVCF	0	NaN	FQSAAATAKGPKGALSPGGFDDSTLPLVDKS	1	NaN	NaN	1.2822	NaN	NaN	NaN	S	2	0.999625	0.033362	49.076	37.2725	0	1.2822
C9JJX6;E9PDC3;O00192-2;O00192	846;909;852;915	C9JJX6	Armadillo repeat protein deleted in velo-cardio-facial syndrome	ARVCF	0	NaN	GYSTVDRRERRPRGASSAGEASEKEPLKLDP	1	0.361881	NaN	NaN	NaN	NaN	NaN	S	2	0.959722	0.00326458	149.82	13.7709	0	0.361881
C9JJX6;E9PDC3;O00192-2;O00192	285;348;285;348	C9JJX6	Armadillo repeat protein deleted in velo-cardio-facial syndrome	ARVCF	0	NaN	MGSLDRLVRRSPSVDSARKEPRWRDPELPEV	1	0.210015	NaN	NaN	NaN	NaN	NaN	S	2	0.829746	0.0276323	49.934	7.14956	0	0.210015
C9JJX6;E9PDC3;O00192-2;O00192	204;267;204;267	C9JJX6	Armadillo repeat protein deleted in velo-cardio-facial syndrome	ARVCF	0	NaN	ERFQAEPYGLEDDTRSLAADDEGGPELEPDY	1	0.652326	NaN	NaN	NaN	NaN	NaN	S	2	1	0.000133602	133.29	129.525	0	0.652326
C9JJX6;E9PDC3;O00192-2;O00192	573;636;579;642	C9JJX6	Armadillo repeat protein deleted in velo-cardio-facial syndrome	ARVCF	0	NaN	KAKGKKDGEMDRNFDTLDLPKRTEAAKGFEL	1	-0.118727	NaN	0.137241	NaN	NaN	NaN	T	2	1	0.00298306	133.88	54.3425	0.0204365	0.00925713
Q9ULH1;Q9ULH1-2;H0YBF7;H0YBM4	738;741;559;152	Q9ULH1	Arf-GAP with SH3 domain, ANK repeat and PH domain-containing protein 1	ASAP1	0	NaN	DKPSPIKKERSPRPQSFCHSSSISPQDKLAL	1	NaN	NaN	-0.443222	NaN	NaN	NaN	S	3	0.780172	0.000374821	102.21	5.50401	0	-0.443222
Q9ULH1;Q9ULH1-2;H0YBF7;H0YBM4	746;749;567;160	Q9ULH1	Arf-GAP with SH3 domain, ANK repeat and PH domain-containing protein 1	ASAP1	0	NaN	ERSPRPQSFCHSSSISPQDKLALPGFSTPRD	1	0.544485	NaN	NaN	NaN	NaN	NaN	S	2	0.999996	1.14e-18	268.09	53.9512	0	0.544485
Q9ULH1;Q9ULH1-2;H0YBF7;H0YBM4	717;720;538;131	Q9ULH1	Arf-GAP with SH3 domain, ANK repeat and PH domain-containing protein 1	ASAP1	0	NaN	HVEYEWNLRQEEIDESDDDLDDKPSPIKKER	1;2	0.145743	NaN	NaN	NaN	NaN	NaN	S	3	1	6.5e-08	184.66	184.659	0	0.145743
Q9ULH1;Q9ULH1-2;H0YBF7;H0YBM4	726;729;547;140	Q9ULH1	Arf-GAP with SH3 domain, ANK repeat and PH domain-containing protein 1	ASAP1	0	NaN	QEEIDESDDDLDDKPSPIKKERSPRPQSFCH	2	NaN	NaN	NaN	NaN	NaN	NaN	S	3	1	6.5e-08	184.66	184.659	0	NaN
Q9ULH1;Q9ULH1-2;H0YBF7	839;842;660	Q9ULH1	Arf-GAP with SH3 domain, ANK repeat and PH domain-containing protein 1	ASAP1	0	NaN	KKRPPPPPPGHKRTLSDPPSPLPHGPPNKGA	1;2	-1.55618	NaN	-1.39566	NaN	NaN	NaN	S	2	0.999901	0.000115158	148.36	40.0214	1.46112	-1.47592
Q9ULH1;Q9ULH1-2;H0YBF7	843;846;664	Q9ULH1	Arf-GAP with SH3 domain, ANK repeat and PH domain-containing protein 1	ASAP1	0	NaN	PPPPPGHKRTLSDPPSPLPHGPPNKGAVPWG	1;2	0.212507	NaN	0.25882	NaN	NaN	NaN	S	3	0.999996	0.000162447	106.58	52.621	1.20513	0.235664
Q9ULH1;Q9ULH1-2;H0YBF7;H0YBM4	1027;1030;848;384	Q9ULH1	Arf-GAP with SH3 domain, ANK repeat and PH domain-containing protein 1	ASAP1	0	NaN	QQPSEVTLKSHPLDLSPNVQSRDAIQKQASE	1	0.266996	NaN	0.689568	NaN	NaN	NaN	S	2	0.999897	0.001165	118.23	40.0053	0.577047	0.478282
Q9ULH1;Q9ULH1-2;H0YBF7;H0YBM4	1008;1011;829;365	Q9ULH1	Arf-GAP with SH3 domain, ANK repeat and PH domain-containing protein 1	ASAP1	0	NaN	PQLGDLLAKSQTGDVSPKAQQPSEVTLKSHP	1	0.694479	NaN	1.13376	NaN	NaN	NaN	S	2	1	0.00430334	98.406	66.279	0.823566	0.91412
Q9ULH1;Q9ULH1-2;H0YBF7	837;840;658	Q9ULH1	Arf-GAP with SH3 domain, ANK repeat and PH domain-containing protein 1	ASAP1	0	NaN	LSKKRPPPPPPGHKRTLSDPPSPLPHGPPNK	2	NaN	NaN	NaN	NaN	NaN	NaN	T	3	0.705935	0.000373497	106.58	3.80318	0	NaN
O43150-2;O43150	701;701	O43150-2	Arf-GAP with SH3 domain, ANK repeat and PH domain-containing protein 2	ASAP2	0	NaN	HVEYEWRLLHEDLDESDDDMDEKLQPSPNRR	1	0.0184917	NaN	0.106616	NaN	NaN	NaN	S	3	1	1.78e-14	312.26	58.0243	0.408189	0.062554
H0YEB0;Q8TDY4-2;Q8TDY4-3;Q8TDY4	162;366;853;862	H0YEB0	Arf-GAP with SH3 domain, ANK repeat and PH domain-containing protein 3	ASAP3	0	NaN	RFSSESTRSYRRGARSPEDGPSARQPLPRRN	1	0.504773	NaN	NaN	NaN	NaN	NaN	S	2	1	0.00809654	150.01	82.3281	0	0.504773
D5MNW9;J3KQJ5;Q8WXI3-2;Q8WXI3-3;Q8WXI3	436;474;391;414;429	D5MNW9	Ankyrin repeat and SOCS box protein 10	ASB10	0	NaN	SLFALVRQPRSLQHLSRCALRSHLEGSLPQA	1	3.36527	NaN	NaN	NaN	NaN	NaN	S	3	0.999956	0.018151	53.869	43.6017	0	3.36527
Q9H1I8;Q9H1I8-3	713;637	Q9H1I8	Activating signal cointegrator 1 complex subunit 2	ASCC2	0.242269	0.140316	AKKGYRHDSSTAVAGSPRGHGQSRETTQERR	1	-0.0671829	-0.0309729	0.0771063	-0.239736	-0.0362099	0.316843	S	2	1	0.00114334	220.97	73.4114	0.0194124	0.00496172
Q8N3C0	2195	Q8N3C0	Activating signal cointegrator 1 complex subunit 3	ASCC3	2.01992	1.0517	TQASLSAQVNTKVSDSLTDLALK________	1	1.016	-0.0514888	0.980318	-0.0556063	1.06749	1.03592	S	2	0.992851	0.00434881	101.3	21.4289	1.94398	0.998157
Q8N3C0	1606	Q8N3C0	Activating signal cointegrator 1 complex subunit 3	ASCC3	0.844635	-0.943491	MDEREMENIIATVRDSNLKLTLAFGIGMHHA	1	-1.21056	-0.0514888	-0.783514	-0.0556063	-1.15907	-0.727908	S	2	0.999072	3.95e-12	246.67	30.3215	0.871895	-0.997038
Q9Y294	192	Q9Y294	Histone chaperone ASF1A	ASF1A	0	NaN	DALPSASKGWSTSENSLNVMLESHMDCM___	1	NaN	-0.188924	NaN	-0.131692	NaN	NaN	S	2	0.998996	0.000217126	122.6	31.6177	0	NaN
Q9Y294	175	Q9Y294	Histone chaperone ASF1A	ASF1A	0	NaN	LEDAESSNPNLQSLLSTDALPSASKGWSTSE	2	NaN	-0.188924	NaN	-0.131692	NaN	NaN	S	3	0.793423	9.81e-05	80.166	5.88452	0	NaN
Q9Y294	165	Q9Y294	Histone chaperone ASF1A	ASF1A	0.603466	-0.383482	HINWEDNTEKLEDAESSNPNLQSLLSTDALP	1	-0.73068	-0.188924	-0.356901	-0.131692	-0.541756	-0.225209	S	3	0.532882	1.9e-05	94.15	0.583369	0.676249	-0.54379
Q9Y294	166	Q9Y294	Histone chaperone ASF1A	ASF1A	0	-0.541756	INWEDNTEKLEDAESSNPNLQSLLSTDALPS	1;2	-0.73068	-0.188924	NaN	-0.131692	-0.541756	NaN	S	3	0.6866	1.9e-05	94.15	4.40912	0	-0.73068
Q9NVP2;K7ES22	198;139	Q9NVP2	Histone chaperone ASF1B	ASF1B	0	NaN	GLGLPGCIPGLLPENSMDCI___________	1	NaN	-0.167232	NaN	-0.238868	NaN	NaN	S	2	1	0.000735221	88.071	87.7934	0	NaN
Q9NVP2;K7ES22	179;120	Q9NVP2	Histone chaperone ASF1B	ASF1B	0	0.149026	ETQDPSLGCGLPLNCTPIKGLGLPGCIPGLL	1	-0.0182058	-0.167232	NaN	-0.238868	0.149026	NaN	T	3	0.988122	0.0153979	45.363	19.7442	0	-0.0182058
Q9UBL3;F5H8F7;Q9UBL3-3;Q9UBL3-2	316;177;222;222	Q9UBL3	Set1/Ash2 histone methyltransferase complex subunit ASH2	ASH2L	0.421751	0.296946	KQQDGGTTGTTKKARSDPLFSAQRLPPHGYP	1	-0.125872	-0.221926	0.246591	-0.251247	0.0960541	0.497837	S	2	0.999998	0.0223079	95.662	57.8921	0.0966568	0.0603593
Q9UBL3	101	Q9UBL3	Set1/Ash2 histone methyltransferase complex subunit ASH2	ASH2L	0.0929497	0.0088055	EGAGDTSEVMDTQAGSVDEENGRQLGEVELQ	1	-0.241322	-0.221926	-0.21424	-0.251247	-0.0193956	0.0370066	S	3	0.999996	2.04e-26	264.23	53.86	1.42251	-0.227781
Q9UBL3;F5H8F7;Q9UBL3-3;Q9UBL3-2;H0YAQ0	623;484;529;496;85	Q9UBL3	Set1/Ash2 histone methyltransferase complex subunit ASH2	ASH2L	0.686296	-0.00157635	ADVLYHVETEVDGRRSPPWEP__________	1	-0.224031	-0.221926	-0.252295	-0.251247	-0.0021048	-0.0010479	S	2	1	0.0160697	94.409	76.2819	1.4233	-0.238163
O95671;O95671-2;O95671-3;E7ER97	239;223;181;163	O95671	N-acetylserotonin O-methyltransferase-like protein	ASMTL	0.751169	-0.142783	VKHDSIPAADTFEDLSDVEGGGSEPTQRDAG	1	0.0912598	0.193204	-0.00118347	0.182438	-0.101944	-0.183621	S	2	1	2.04e-57	365.15	98.0934	0.293918	0.0450381
C9IYZ1;Q9NWL6	396;396	C9IYZ1	Asparagine synthetase domain-containing protein 1	ASNSD1	0.663779	0.455813	PSEEFSKDVAAAAADSPNKHVSVPDRITGRA	1	0.491699	-0.125699	0.358284	0.0640551	0.617398	0.294229	S	2	1	0.000885525	105.28	105.277	1.00385	0.424992
Q8IZT6-2;Q8IZT6	605;605	Q8IZT6-2	Abnormal spindle-like microcephaly-associated protein	ASPM	0	NaN	ITEHTEVREIKRIHFSPSEPKTSAVKKTKNV	1	NaN	NaN	-0.166778	NaN	NaN	NaN	S	2	0.943195	0.00399868	106.67	12.2021	0	-0.166778
Q8IZT6-2;Q8IZT6	225;225	Q8IZT6-2	Abnormal spindle-like microcephaly-associated protein	ASPM	0	NaN	NSLILEENKIPISPISPAFNECHGATCLPLS	1	0.707348	NaN	0.679604	NaN	NaN	NaN	S	3	0.999929	3.04e-05	104.12	42.071	1.89507	0.693476
Q8IZT6-2;Q8IZT6;Q5VYL4	1103;1103;353	Q8IZT6-2	Abnormal spindle-like microcephaly-associated protein	ASPM	0	NaN	CHSDDLINKKKGKRDSGSFEQYSENIKLLMD	1	0.608147	NaN	0.549127	NaN	NaN	NaN	S	2	0.998176	3.95e-07	277.1	27.3809	1.48893	0.578637
Q8IZT6-2;Q8IZT6	425;425	Q8IZT6-2	Abnormal spindle-like microcephaly-associated protein	ASPM	0	NaN	TCKVPLSNENSQVPQSPEDWRKSEVSPRIPE	1	0.191057	NaN	0.301588	NaN	NaN	NaN	S	3	1	1.29e-05	150.06	82.2316	0.852305	0.246322
Q9BZE9;Q9BZE9-2;Q9BZE9-3;J3KRY8;J3KRF7	500;594;448;329;107	Q9BZE9	Tether containing UBX domain for GLUT4	ASPSCR1	1.73536	0.964431	AADVLVARYMSRAAGSPSPLPAPDPAPKSEP	1	0.771125	-0.165434	0.721154	-0.271148	0.936559	0.992302	S	2	0.999773	1.02e-05	161.95	36.4325	1.67141	0.746139
Q9BZE9;Q9BZE9-2;Q9BZE9-3;J3KRY8;J3KRF7	502;596;450;331;109	Q9BZE9	Tether containing UBX domain for GLUT4	ASPSCR1	1.04671	0.411304	DVLVARYMSRAAGSPSPLPAPDPAPKSEPAA	1	0.304277	-0.165434	0.0817487	-0.271148	0.469712	0.352897	S	2	0.998577	0.000369443	153.23	28.4606	0.477675	0.193013
Q9BZE9;Q9BZE9-2;Q9BZE9-3;J3QR12;Q9BZE9-4;J3QL04;J3KRY8	275;275;198;198;198;272;104	Q9BZE9	Tether containing UBX domain for GLUT4	ASPSCR1	0.357716	0.278854	RPLTSSSAKLPKSLSSPGGPSKPKKSKSGQD	1	0.343237	-0.165434	-0.222111	-0.271148	0.508672	0.0490367	S	2	0.999667	0.00402625	112.02	35.8852	0.062665	0.0605631
Q7L266;Q7L266-2	251;123	Q7L266	Isoaspartyl peptidase/L-asparaginase;Isoaspartyl peptidase/L-asparaginase alpha chain;Isoaspartyl peptidase/L-asparaginase beta chain	ASRGL1	0	NaN	FHIEQGKTVEEAADLSLGYMKSRVKGLGGLI	2	NaN	-0.0733933	NaN	-0.0143247	NaN	NaN	S	2	0.96178	0.0454214	42.633	14.0058	0	NaN
Q7L266;Q7L266-2	243;115	Q7L266	Isoaspartyl peptidase/L-asparaginase;Isoaspartyl peptidase/L-asparaginase alpha chain;Isoaspartyl peptidase/L-asparaginase beta chain	ASRGL1	0	NaN	VNLARLTLFHIEQGKTVEEAADLSLGYMKSR	2	NaN	-0.0733933	NaN	-0.0143247	NaN	NaN	T	2	0.999563	0.0454214	42.633	33.4222	0	NaN
Q9NVM9;B4DNK1;H0YH12	623;522;270	Q9NVM9	Protein asunder homolog	ASUN	0	NaN	ERGKEELAEAEIIKDSPDSPEPPNKKPLVEM	2	NaN	-0.135697	NaN	-0.159799	NaN	NaN	S	3	1	0.000142196	123.24	123.244	0	NaN
Q9NVM9;B4DNK1;H0YH12	626;525;273	Q9NVM9	Protein asunder homolog	ASUN	1.13497	-0.527939	KEELAEAEIIKDSPDSPEPPNKKPLVEMDET	1;2	-0.724683	-0.135697	-0.626691	-0.159799	-0.588986	-0.466893	S	3	1	3.65e-31	316.02	123.244	1.33647	-0.675687
A6NIZ6;Q8IXJ9	498;503	A6NIZ6	Putative Polycomb group protein ASXL1	ASXH1;ASXL1	0	NaN	SRIQAEPDNLARASASPDRIPSLPQETVDQE	1	0.38228	NaN	0.0132121	NaN	NaN	NaN	S	3	0.822485	2.02e-05	124.62	6.65898	0.320566	0.197746
E7EWD6;Q76L83	806;834	E7EWD6	Putative Polycomb group protein ASXL2	ASXL2	0	NaN	SHPQGPSSCRQEKAPSPTGPALISGASPVHC	1	-0.920489	NaN	-0.895878	NaN	NaN	NaN	S	3	0.996476	3.77e-06	93.759	24.5153	2.06423	-0.908183
E7EWD6;Q76L83;Q76L83-2	412;440;180	E7EWD6	Putative Polycomb group protein ASXL2	ASXL2	0	NaN	VVSQSECKEEALQMSSPGRKEECESQGEVQP	1	2.68776	NaN	0.0335111	NaN	NaN	NaN	S	2	0.951868	0.00090161	242.19	12.9614	0.307979	1.36063
E7EWD6;Q76L83;Q76L83-2	534;562;302	E7EWD6	Putative Polycomb group protein ASXL2	ASXL2	0	NaN	QETNMKEPLATLVDQSPESLKRKSSLTQEEA	1	-0.165758	NaN	-0.00581129	NaN	NaN	NaN	S	2	0.973324	1.67e-06	235.72	15.6214	0.320854	-0.0857847
E7EWD6;Q76L83;Q76L83-2	1126;1154;637	E7EWD6	Putative Polycomb group protein ASXL2	ASXL2	0	NaN	RRTHSVNPEDRFCLSSPTEALKMGYTDCKNA	1	0.414352	NaN	0.795435	NaN	NaN	NaN	S	2	0.974309	0.00329994	129.54	15.8434	0.711591	0.604893
E7EWD6;Q76L83;Q76L83-2	367;395;135	E7EWD6	Putative Polycomb group protein ASXL2	ASXL2	0	NaN	QSSGLSLEDSKKLTASPSDPKVKKTPAEQPK	1	0.225398	NaN	NaN	NaN	NaN	NaN	S	2	0.954139	0.0045841	90.793	13.1959	0	0.225398
E7EWD6;Q76L83;Q76L83-2	1291;1319;802	E7EWD6	Putative Polycomb group protein ASXL2	ASXL2	0	NaN	QPLLLPPLQTPKLYGSPTQIGPSYRGMINVS	1	0.295723	NaN	-0.148609	NaN	NaN	NaN	S	2	0.996778	0.00324938	75.143	24.9548	0.0988399	0.0735571
E7EWD6;Q76L83;Q76L83-2	496;524;264	E7EWD6	Putative Polycomb group protein ASXL2	ASXL2	0	NaN	ASNYNKSESQESLVTSPSKPKSPGVEKPIVK	1	NaN	NaN	NaN	NaN	NaN	NaN	S	2	0.761935	0.00305059	151.39	6.05818	0	NaN
E7EWD6;Q76L83;Q76L83-2	498;526;266	E7EWD6	Putative Polycomb group protein ASXL2	ASXL2	0	NaN	NYNKSESQESLVTSPSKPKSPGVEKPIVKPT	1	NaN	NaN	NaN	NaN	NaN	NaN	S	2	0.932499	0.00136959	139.29	11.6849	0	NaN
E7EWD6;Q76L83;Q76L83-2	502;530;270	E7EWD6	Putative Polycomb group protein ASXL2	ASXL2	0	NaN	SESQESLVTSPSKPKSPGVEKPIVKPTAGAG	1	0.0854246	NaN	NaN	NaN	NaN	NaN	S	3	1	3.51e-06	140.27	104.695	0	0.0854246
E7EWD6;Q76L83;Q76L83-2	1115;1143;626	E7EWD6	Putative Polycomb group protein ASXL2	ASXL2	0	NaN	ISTYGRGSESFRRTHSVNPEDRFCLSSPTEA	1	0.690551	NaN	NaN	NaN	NaN	NaN	S	2	0.998369	0.00431989	97.957	27.868	0	0.690551
E7EWD6;Q76L83;Q76L83-2	495;523;263	E7EWD6	Putative Polycomb group protein ASXL2	ASXL2	0	NaN	TASNYNKSESQESLVTSPSKPKSPGVEKPIV		NaN	NaN	NaN	NaN	NaN	NaN	T	2	0.492658	6.39e-05	188.1	0.365792	0	NaN
Q8NBU5;B4E2J1	318;230	Q8NBU5	ATPase family AAA domain-containing protein 1	ATAD1	0	NaN	CRDAALLCVREYVNSTSEESHDEDEIRPVQQ		NaN	-0.133385	NaN	-0.106809	NaN	NaN	T	3	0.470953	4.48e-60	383.77	0	0	NaN
Q8NBU5;B4E2J1	322;234	Q8NBU5	ATPase family AAA domain-containing protein 1	ATAD1	0	1.09558	ALLCVREYVNSTSEESHDEDEIRPVQQQDLH	1	NaN	-0.133385	0.988776	-0.106809	NaN	1.09558	S	4	0.859674	8.22e-19	220.33	9.48889	0	0.988776
Q8NBU5;B4E2J1	317;229	Q8NBU5	ATPase family AAA domain-containing protein 1	ATAD1	0	0.878579	MCRDAALLCVREYVNSTSEESHDEDEIRPVQ	1	0.745194	-0.133385	NaN	-0.106809	0.878579	NaN	S	4	0.996924	4.48e-60	383.77	25.9077	0	0.745194
Q6PL18	1302	Q6PL18	ATPase family AAA domain-containing protein 2	ATAD2	0.955601	1.50586	EGKEMCVLRMTRARRSQVEQQQLITVEKALA	1	1.08393	-0.157254	1.61112	-0.159412	1.24118	1.77054	S	2	1	0.00028463	193.64	111.259	0.910164	1.34753
Q6PL18	1151	Q6PL18	ATPase family AAA domain-containing protein 2	ATAD2	0	0.624743	DKRSDPEQNEKLKTPSTPVACSTPAQLKRKI	1	0.467488	-0.157254	NaN	-0.159412	0.624742	NaN	S	2	0.611197	7.39e-05	199.91	1.96457	0	0.467488
Q6PL18	1190	Q6PL18	ATPase family AAA domain-containing protein 2	ATAD2	1.53656	0.578189	GTIKKRRKISQAKDDSQNAIDHKIESDTEET	1	0.394514	-0.157254	0.445197	-0.159412	0.551768	0.604609	S	2	1	0.00325251	162.13	162.135	1.41591	0.419856
Q6PL18	1243	Q6PL18	ATPase family AAA domain-containing protein 2	ATAD2	0.576142	0.436473	KQQNASESKLELRNNSNTCNIENELEDSRKT	1	0.472488	-0.157254	0.0837921	-0.159412	0.629742	0.243204	S	3	0.999954	2.64e-05	161.68	43.3624	0.410875	0.27814
Q6PL18;Q6PL18-2	342;172	Q6PL18	ATPase family AAA domain-containing protein 2	ATAD2	0.149664	0.151401	SPARPRYRLSSAGPRSPYCKRMNRRRHAIHS	1	0.301354	-0.157254	-0.315217	-0.159412	0.458608	-0.155805	S	2	0.999982	0.00444404	186.16	48.5931	0.00626051	-0.00693178
Q6PL18;Q6PL18-2	327;157	Q6PL18	ATPase family AAA domain-containing protein 2	ATAD2	0.395408	-0.215785	PRHQRKPNIFYSGPASPARPRYRLSSAGPRS	1	-0.531031	-0.157254	-0.217206	-0.159412	-0.373777	-0.0577937	S	3	1	1.89e-07	237.76	68.9794	0.597182	-0.374118
Q6PL18	141	Q6PL18	ATPase family AAA domain-containing protein 2	ATAD2	0	-0.509871	VIPVTRSLRARNIVQSTEHLHEDNGDVEVRR	1	-0.667126	-0.157254	NaN	-0.159412	-0.509872	NaN	S	3	0.790178	7.12e-05	105.72	5.75873	0	-0.667126
Q9ULI0-2;Q9ULI0;H7BYF1	1316;1321;597	Q9ULI0-2	ATPase family AAA domain-containing protein 2B	ATAD2B	0	NaN	QKILLEDQSKEKPETSTENHGDDLEKLEALE		NaN	NaN	NaN	NaN	NaN	NaN	S	3	0.333333	0.003082	58.024	0	0	NaN
Q9ULI0-2;Q9ULI0;C9JG15	318;318;332	Q9ULI0-2	ATPase family AAA domain-containing protein 2B	ATAD2B	0	NaN	AHQKKRENTLFDIHRSPARRSHIRRKKHAIH	1	-0.426761	NaN	-0.574799	NaN	NaN	NaN	S	3	0.999695	0.00011759	182.91	35.1538	1.02956	-0.50078
Q9ULI0-2;Q9ULI0;C9JG15	81;81;81	Q9ULI0-2	ATPase family AAA domain-containing protein 2B	ATAD2B	0	NaN	VTLDEARKVEVDGSLSDSHVSPPAKRTLKQP	1	-0.482754	NaN	-0.488228	NaN	NaN	NaN	S	3	0.985613	1.68e-06	194.68	19.26	2.44504	-0.485491
Q9ULI0-2;Q9ULI0;H7BYF1	1333;1338;614	Q9ULI0-2	ATPase family AAA domain-containing protein 2B	ATAD2B	0	NaN	ENHGDDLEKLEALECSNNEKLEPGSDVEVKD	1	0.246955	NaN	NaN	NaN	NaN	NaN	S	2	1	0.0347875	49.595	49.5946	0	0.246955
Q9ULI0-2;Q9ULI0;C9JG15	16;16;16	Q9ULI0-2	ATPase family AAA domain-containing protein 2B	ATAD2B	0	NaN	MVNTRKSSLRLLGSKSPGPGPGPGAGAEPGA	1	-0.569394	NaN	-1.27313	NaN	NaN	NaN	S	3	1	2.54e-11	185.47	127.037	0.634013	-0.921264
Q9ULI0-2;Q9ULI0;H7BYF1	1315;1320;596	Q9ULI0-2	ATPase family AAA domain-containing protein 2B	ATAD2B	0	NaN	EQKILLEDQSKEKPETSTENHGDDLEKLEAL		NaN	NaN	NaN	NaN	NaN	NaN	T	3	0.333333	0.003082	58.024	0	0	NaN
Q9ULI0-2;Q9ULI0;H7BYF1	1317;1322;598	Q9ULI0-2	ATPase family AAA domain-containing protein 2B	ATAD2B	0	NaN	KILLEDQSKEKPETSTENHGDDLEKLEALEC		NaN	NaN	NaN	NaN	NaN	NaN	T	3	0.333333	0.003082	58.024	0	0	NaN
Q96QE3;Q96QE3-2	614;614	Q96QE3	ATPase family AAA domain-containing protein 5	ATAD5	0	NaN	RISSTPTTETIRGIDSDDVQDNSQLKASTQK	1	0.249749	NaN	NaN	0.100843	NaN	NaN	S	2	1	0.000739617	152.32	100.145	0	0.249749
Q96QE3;Q96QE3-2	602;602	Q96QE3	ATPase family AAA domain-containing protein 5	ATAD5	0	2.06217	NVSTPKSTRRSGRISSTPTTETIRGIDSDDV	1	2.15869	NaN	2.16302	0.100843	NaN	2.06217	S	2	0.936945	0.00742343	77.192	11.8334	3.19597	2.16085
Q96QE3;Q96QE3-2	86;86	Q96QE3	ATPase family AAA domain-containing protein 5	ATAD5	0	0.216229	PTNEKTQLGKECKIKSPESVPVDSNKDCTTP	1	0.183455	NaN	0.317072	0.100843	NaN	0.216229	S	2	1	0.000500858	233.57	75.8646	0.779695	0.250264
Q96QE3;Q96QE3-2	306;306	Q96QE3	ATPase family AAA domain-containing protein 5	ATAD5	0	0.102797	VPSETVDEIVKSGYISESENSEISQQVRFKT	1	0.218719	NaN	0.20364	0.100843	NaN	0.102797	S	2	0.99998	5.95e-09	246.67	46.9686	1.6436	0.211179
Q96QE3;Q96QE3-2	589;589	Q96QE3	ATPase family AAA domain-containing protein 5	ATAD5	0	-0.497341	LTQSKAESEASLLNVSTPKSTRRSGRISSTP	1	0.159371	NaN	-0.396498	0.100843	NaN	-0.497341	S	2	0.625606	0.00183184	92.939	2.23223	0.128833	-0.118564
Q96QE3;Q96QE3-2	817;817	Q96QE3	ATPase family AAA domain-containing protein 5	ATAD5	0	-0.668568	KAQKAADPVPSFDESSQDTSEKSQDCDVQCK	1	-0.472429	NaN	-0.567725	0.100843	NaN	-0.668568	S	2	0.945041	0.000112822	151.3	12.4746	1.23536	-0.520077
Q5SQI0-3;Q5SQI0-2;Q5SQI0;Q5SQI0-7;Q5SQI0-6;Q5SQI0-5;Q5SQI0-4	292;303;315;292;292;315;315	Q5SQI0-3	Alpha-tubulin N-acetyltransferase 1	ATAT1	0	NaN	PHPTARLLLAADPGGSPAQRRRTRGTPPGLV	1	-0.444734	NaN	-0.602591	NaN	NaN	NaN	S	2	1	0.000834702	145.73	106.866	1.02119	-0.523662
Q5SQI0-3;Q5SQI0-2;Q5SQI0;Q5SQI0-7;Q5SQI0-6;Q5SQI0-5;Q5SQI0-4	249;260;272;249;249;272;272	Q5SQI0-3	Alpha-tubulin N-acetyltransferase 1	ATAT1	0	NaN	PRRATPPAHPPPRSSSLGNSPERGPLRPFVP	2	NaN	NaN	NaN	NaN	NaN	NaN	S	2	0.999779	0.00274732	154.48	36.7357	0	NaN
Q5SQI0-3;Q5SQI0-2;Q5SQI0;Q5SQI0-7;Q5SQI0-6;Q5SQI0-5;Q5SQI0-4	253;264;276;253;253;276;276	Q5SQI0-3	Alpha-tubulin N-acetyltransferase 1	ATAT1	0	NaN	TPPAHPPPRSSSLGNSPERGPLRPFVPEQEL	1;2	1.10454	NaN	0.365133	NaN	NaN	NaN	S	2	1	0.00274732	154.48	83.8277	0.527611	0.734835
B4E107;F5GXE4;O95260-2;B4DK25;H0Y5C2;O95260;Q5SQQ1	73;162;169;54;166;169;162	B4E107	Arginyl-tRNA--protein transferase 1	ATE1	0.962648	-0.346859	EGKNSKKEEPQELLQSQDFVGEKLGSGEPSH	1	-0.114535	0.172359	-0.147522	0.259303	-0.286894	-0.406824	S	2	1	4.81e-08	230.93	230.933	1.09845	-0.131028
B8ZZU6;P15336-5;P15336;P15336-4;P15336-2;P15336-6;P15336-8	330;428;446;388;270;67;85	B8ZZU6	Cyclic AMP-dependent transcription factor ATF-2	ATF2	0	NaN	TADKDDSSEDISVPSSPHTEAIQHSSVSTSN	1	0.0190613	NaN	-1.89004	NaN	NaN	NaN	S	3	0.98324	5.11e-19	196.77	20.6948	0.295489	-0.935488
B8ZZU6;P15336-5;P15336;P15336-4;F5H629;E9PBF9;E9PEK8;H7C2N6;P15336-3;P15336-7;C9JCI8	118;118;136;78;118;136;136;125;136;118;78	B8ZZU6	Cyclic AMP-dependent transcription factor ATF-2	ATF2	0	NaN	SKIEEPSVVETTHQDSPLPHPESTTSDEKLV	1	-1.04065	NaN	-0.438542	NaN	NaN	NaN	S	3	0.999815	6.31e-19	216.19	38.3315	0.608893	-0.739594
B8ZZU6;P15336-5;P15336;P15336-4;F5H629;E9PBF9;E9PEK8;H7C2N6;P15336-3;P15336-7;C9JCI8	94;94;112;54;94;112;112;101;112;94;54	B8ZZU6	Cyclic AMP-dependent transcription factor ATF-2	ATF2	0	NaN	KKASEDDIKKMPLDLSPLATPIIRSKIEEPS	1	NaN	NaN	-0.877632	NaN	NaN	NaN	S	2	0.99276	0.0214742	49.537	21.3711	0	-0.877632
B8ZZU6;P15336-5;P15336;P15336-4;F5H629;E9PBF9;E9PEK8;H7C2N6;P15336-3;P15336-7;C9JCI8	72;72;90;32;72;90;90;79;90;72;32	B8ZZU6	Cyclic AMP-dependent transcription factor ATF-2	ATF2	0	NaN	FLKNCEEVGLFNELASPFENEFKKASEDDIK	1	0.111165	NaN	-0.111259	NaN	NaN	NaN	S	3	1	6.17e-07	168.79	44.1578	0.000116523	-4.69e-05
B8ZZU6;P15336-5;P15336;F5H629;E9PBF9;E9PEK8;H7C2N6;P15336-3;P15336-7	44;44;62;44;62;62;51;62;44	B8ZZU6	Cyclic AMP-dependent transcription factor ATF-2	ATF2	0	NaN	HKHEMTLKFGPARNDSVIVADQTPTPTRFLK	3	NaN	NaN	NaN	NaN	NaN	NaN	S	2	1	0.001559	147.26	137.892	0	NaN
B8ZZU6;P15336-5;P15336;P15336-4;F5H629;E9PBF9;P15336-2	149;247;265;207;247;265;89	B8ZZU6	Cyclic AMP-dependent transcription factor ATF-2	ATF2	0	NaN	RPVTMVPSVPGIPGPSSPQPVQSEAKMRLKA	1	-0.528157	NaN	-0.550697	NaN	NaN	NaN	S	3	0.575845	0.000188839	62.442	1.40244	1.87618	-0.539427
B8ZZU6;P15336-5;P15336;F5H629;E9PBF9;E9PEK8;H7C2N6;P15336-3;P15336-7	51;51;69;51;69;69;58;69;51	B8ZZU6	Cyclic AMP-dependent transcription factor ATF-2	ATF2	0	NaN	KFGPARNDSVIVADQTPTPTRFLKNCEEVGL	1;2;3	0.300182	NaN	NaN	NaN	NaN	NaN	T	2	0.997273	4.48e-07	268.25	25.1611	0	0.300182
B8ZZU6;P15336-5;P15336;F5H629;E9PBF9;E9PEK8;H7C2N6;P15336-3;P15336-7	53;53;71;53;71;71;60;71;53	B8ZZU6	Cyclic AMP-dependent transcription factor ATF-2	ATF2	0	NaN	GPARNDSVIVADQTPTPTRFLKNCEEVGLFN	1;2;3	-0.386016	NaN	-1.56909	NaN	NaN	NaN	T	2	0.897581	4.48e-07	268.25	9.41373	0.46038	-0.977555
Q5VTZ4;P18847-5;P18847	162;105;162	Q5VTZ4	Cyclic AMP-dependent transcription factor ATF-3	ATF3	0.0198622	-0.0217112	NLHRPTCIVRAQNGRTPEDERNLFIQQIK__	1	-0.492281	-0.161895	-0.185786	-0.472749	-0.330386	0.286964	T	3	1	0.000123895	210.62	113.735	0.568215	-0.339034
P18848	248	P18848	Cyclic AMP-dependent transcription factor ATF-4	ATF4	0	NaN	QHSPSTRGSPNRSLPSPGVLCGSARPKPYDP	1	0.354903	NaN	0.643579	NaN	NaN	NaN	S	2	0.997862	0.0261682	46.249	27.3835	0.746734	0.499241
P17544-2;P17544-6;P17544-3;P17544;P17544-4;K7ELQ4;K7ESA4	97;97;108;108;97;97;108	P17544-2	Cyclic AMP-dependent transcription factor ATF-7	ATF7	0	NaN	ADEDEKKAAAGPLDMSLPSTPDIKIKEEEPV	2	NaN	NaN	NaN	NaN	NaN	NaN	S	2	0.997119	0.00036971	107.07	24.0943	0	NaN
P17544-2;P17544-6;P17544-3;P17544;P17544-4	402;423;413;434;247	P17544-2	Cyclic AMP-dependent transcription factor ATF-7	ATF7	0	NaN	QGYLESPKESSEPTGSPAPVIQHSSATAPSN	1	-0.849336	NaN	-0.825517	NaN	NaN	NaN	S	3	0.999974	1.76e-19	224.27	45.8068	2.0432	-0.837427
P17544-2;P17544-6;P17544-3;P17544;P17544-4	392;413;403;424;237	P17544-2	Cyclic AMP-dependent transcription factor ATF-7	ATF7	0	NaN	CPVTALQKKTQGYLESPKESSEPTGSPAPVI	1	-0.18007	NaN	-0.0691189	NaN	NaN	NaN	S	2	1	0.00319318	122.46	87.6565	0.574013	-0.124595
P17544-2;P17544-6;P17544-3;P17544;P17544-4;K7ELQ4;K7ESA4;P17544-5	73;73;73;73;73;73;73;73	P17544-2	Cyclic AMP-dependent transcription factor ATF-7	ATF7	0	NaN	LKNCEEVGLFNELASSFEHEFKKAADEDEKK	1	-0.326715	NaN	-0.331681	NaN	NaN	NaN	S	3	0.699499	0.000924876	60.814	3.66941	2.3186	-0.329198
P17544-2;P17544-6;P17544-3;P17544;K7ELQ4	150;171;161;182;171	P17544-2	Cyclic AMP-dependent transcription factor ATF-7	ATF7	0	NaN	LPLHLGYDPLHPTLPSPTSVITQAPPSNRQM	1	-1.43281	NaN	-1.21964	NaN	NaN	NaN	S	4	0.962209	3.43e-19	212.94	14.2093	1.29198	-1.32622
P17544-2;P17544-6;P17544-3;P17544;K7ELQ4	223;244;234;255;244	P17544-2	Cyclic AMP-dependent transcription factor ATF-7	ATF7	0	NaN	PNIPGIPGPPVNSSGSISPSGHPIPSEAKMR		NaN	NaN	NaN	NaN	NaN	NaN	S	4	0.386655	5.31e-07	77.958	1.8547	0	NaN
P17544-2;P17544-6;P17544-3;P17544;K7ELQ4	225;246;236;257;246	P17544-2	Cyclic AMP-dependent transcription factor ATF-7	ATF7	0	NaN	IPGIPGPPVNSSGSISPSGHPIPSEAKMRLK	1	-1.37221	NaN	NaN	NaN	NaN	NaN	S	3	0.919891	4.42e-15	178.34	12.2454	0	-1.37221
P17544-2;P17544-6;P17544-3;P17544;P17544-4;K7ELQ4;K7ESA4;P17544-5	44;44;44;44;44;44;44;44	P17544-2	Cyclic AMP-dependent transcription factor ATF-7	ATF7	0	NaN	HKHEMTLKFGPARTDSVIIADQTPTPTRFLK	3	NaN	NaN	NaN	NaN	NaN	NaN	S	2	0.860783	0.00379179	92.565	7.96353	0	NaN
P17544-2;P17544-6;P17544-3;P17544;P17544-4;K7ELQ4;K7ESA4	101;101;112;112;101;101;112	P17544-2	Cyclic AMP-dependent transcription factor ATF-7	ATF7	0	NaN	EKKAAAGPLDMSLPSTPDIKIKEEEPVEEVT	1;2	1.12559	NaN	-0.183261	NaN	NaN	NaN	T	2	0.89298	0.00036971	107.07	9.25349	0.219863	0.471162
P17544-2;P17544-6;P17544-3;P17544;P17544-4;K7ELQ4;K7ESA4;P17544-5	51;51;51;51;51;51;51;51	P17544-2	Cyclic AMP-dependent transcription factor ATF-7	ATF7	0	NaN	KFGPARTDSVIIADQTPTPTRFLKNCEEVGL	2;3	NaN	NaN	NaN	NaN	NaN	NaN	T	2	0.986642	1.99e-06	169.45	18.0044	0	NaN
P17544-2;P17544-6;P17544-3;P17544;P17544-4;K7ELQ4;K7ESA4;P17544-5	53;53;53;53;53;53;53;53	P17544-2	Cyclic AMP-dependent transcription factor ATF-7	ATF7	0	NaN	GPARTDSVIIADQTPTPTRFLKNCEEVGLFN	1;2;3	NaN	NaN	-0.628363	NaN	NaN	NaN	T	2	0.895445	2.44e-08	266.29	9.53046	0	-0.628363
Q6VMQ6;F5GX74;Q6VMQ6-2;G3V1U0;A8MV73	474;482;474;474;474	Q6VMQ6;Q6VMQ6-2	Activating transcription factor 7-interacting protein 1	ATF7IP	0	NaN	PIDETNPDLEEKMESSFGSPSKQESSESLPK	2	NaN	-0.0196676	NaN	0.0950467	NaN	NaN	S	2	0.99278	0.00304387	130.47	21.3949	0	NaN
Q6VMQ6;F5GX74	518;526	Q6VMQ6	Activating transcription factor 7-interacting protein 1	ATF7IP	0	1.20952	GEKDESEVISQNETCSPAEVESNEKDNKPEE	1	NaN	-0.0196676	1.30457	0.0950467	NaN	1.20952	S	2	0.939858	0.000487141	115.39	11.9905	0	1.30457
Q6VMQ6;F5GX74;Q6VMQ6-2;G3V1U0;A8MV73;F8WE35;F5H8I0;F5H2W9;F5H2H9;F5GZ10;F5H502;F5H1K9;F5H6X8;F5H221;F5H592	57;65;57;57;57;57;57;57;57;57;57;57;57;57;57	Q6VMQ6;Q6VMQ6-2	Activating transcription factor 7-interacting protein 1	ATF7IP	0	0.853246	KLLNGNHENGDLDPTSPLENMDYIKDKEEVN	1	0.833578	-0.0196676	NaN	0.0950467	0.853246	NaN	S	3	0.975776	3.14e-05	107.15	16.0512	0	0.833578
Q6VMQ6;F5GX74;Q6VMQ6-2;G3V1U0	559;567;558;558	Q6VMQ6;Q6VMQ6-2	Activating transcription factor 7-interacting protein 1	ATF7IP	1.39979	0.805152	RPSEKNEFSRRKRSKSEDMDNVQSKRRRYME	1	0.835924	-0.0196676	0.849759	0.0950467	0.855592	0.754712	S	2	1	0.0013802	246.49	197.33	2.28192	0.842842
Q6VMQ6;F5GX74;Q6VMQ6-2;G3V1U0	852;860;851;851	Q6VMQ6;Q6VMQ6-2	Activating transcription factor 7-interacting protein 1	ATF7IP	0.836056	0.394534	SLPNPTKPNNVPSVPSPSIQRNPTASAAPLG	1	0.282855	-0.0196676	0.581592	0.0950467	0.302522	0.486546	S	2	0.811317	5.46e-05	82.413	6.55721	0.674023	0.432224
Q6VMQ6;F5GX74;Q6VMQ6-2;G3V1U0;A8MV73	496;504;496;496;496	Q6VMQ6;Q6VMQ6-2	Activating transcription factor 7-interacting protein 1	ATF7IP	0.664632	0.233931	QESSESLPKEAFLVLSDEEDISGEKDESEVI	1	0.297015	-0.0196676	0.246226	0.0950467	0.316683	0.151179	S	2	0.999982	0.000368492	154.48	47.4661	1.2266	0.27162
Q6VMQ6;F5GX74;Q6VMQ6-2;G3V1U0;A8MV73	477;485;477;477;477	Q6VMQ6;Q6VMQ6-2	Activating transcription factor 7-interacting protein 1	ATF7IP	1.2771	0.160511	ETNPDLEEKMESSFGSPSKQESSESLPKEAF	1;2	0.154194	-0.0196676	0.242206	0.0950467	0.173862	0.147159	S	2	0.989359	0.00304387	153.39	19.7286	0.856701	0.1982
Q6VMQ6;F5GX74;Q6VMQ6-2;G3V1U0;A8MV73	429;437;429;429;429	Q6VMQ6;Q6VMQ6-2	Activating transcription factor 7-interacting protein 1	ATF7IP	0	-0.138665	VIEDNKSENILENTDSMETDEIIPILEKLAP	1	-0.158333	-0.0196676	NaN	0.0950467	-0.138665	NaN	S	2	0.975475	0.000174486	106.28	16.8445	0	-0.158333
Q6VMQ6;F5GX74;Q6VMQ6-2;G3V1U0;A8MV73	334;342;334;334;334	Q6VMQ6;Q6VMQ6-2	Activating transcription factor 7-interacting protein 1	ATF7IP	0	-0.166168	KNGADEKLEQIQSKDSLDEKNKADNNIDANE	1	-0.185835	-0.0196676	NaN	0.0950467	-0.166167	NaN	S	2	0.995688	0.00228865	153.06	23.634	0	-0.185835
Q6VMQ6;F5GX74;Q6VMQ6-2;G3V1U0;A8MV73;F8WE35;F5H8I0;F5H2W9;F5H2H9;F5GZ10;F5H502;F5H1K9	113;121;113;113;113;113;113;113;113;113;113;113	Q6VMQ6;Q6VMQ6-2	Activating transcription factor 7-interacting protein 1	ATF7IP	1.01905	-0.445941	NVKNKQDDDLNCEPLSPHNITPEPVSKLPAE	1	-0.398056	-0.0196676	-0.418446	0.0950467	-0.378389	-0.513493	S	2	0.999999	5.05e-15	263.49	61.7213	1.79875	-0.408251
O75143-3;O75143-2;O75143;O75143-5;H0YEM7;O75143-4;H0YCL5	324;324;361;394;93;245;19	O75143-3	Autophagy-related protein 13	ATG13	0	NaN	SEDTETVSNSSEGRASPHDVLETIFVRKVGA	1	0.425674	NaN	0.481712	NaN	NaN	NaN	S	2	1	0.000801947	155.37	111.513	1.40598	0.453693
E7EVC7;Q676U5-2;Q676U5;Q676U5-5;Q676U5-3;Q676U5-4;C9JAY7;C9J1B2;C9JK97	255;255;255;111;255;111;111;171;111	E7EVC7	Autophagy-related protein 16-1	ATG16L1	0	NaN	IEVIVDETSDHTEETSPVRAISRAATKRLSQ	1	0.223052	NaN	0.033652	NaN	NaN	NaN	S	3	0.936044	5.1e-52	329.39	11.711	0.392897	0.128352
E7EVC7;Q676U5-2;Q676U5;Q676U5-3;C9J1B2	70;70;70;70;70	E7EVC7	Autophagy-related protein 16-1	ATG16L1	0	NaN	KLQAEKHDVPNRHEISPGHDGTWNDNQLQEM	1	1.69644	NaN	1.00942	NaN	NaN	NaN	S	3	1	2.2e-25	291.53	85.8824	0.800537	1.35293
E7EVC7;Q676U5-2;Q676U5;Q676U5-5;Q676U5-3;Q676U5-4;C9JAY7	304;268;287;124;287;143;124	E7EVC7	Autophagy-related protein 16-1	ATG16L1	0	NaN	PLLGHHSSSDAARRRSVSSFPVPQDNVDTHP	1	1.71896	NaN	1.69866	NaN	NaN	NaN	S	3	0.998597	4.81e-10	224.05	28.7547	2.42232	1.70881
E7EVC7;Q676U5-2;Q676U5;Q676U5-5;Q676U5-3;Q676U5-4;C9JAY7	306;270;289;126;289;145;126	E7EVC7	Autophagy-related protein 16-1	ATG16L1	0	NaN	LGHHSSSDAARRRSVSSFPVPQDNVDTHPGS		NaN	NaN	NaN	NaN	NaN	NaN	S	3	0.333305	0.0285297	40.208	0	0	NaN
E7EVC7;Q676U5-2;Q676U5;Q676U5-5;Q676U5-3;Q676U5-4;C9JAY7	307;271;290;127;290;146;127	E7EVC7	Autophagy-related protein 16-1	ATG16L1	0	NaN	GHHSSSDAARRRSVSSFPVPQDNVDTHPGSG		NaN	NaN	NaN	NaN	NaN	NaN	S	3	0.333305	0.0285297	40.208	0	0	NaN
E7EVC7;Q676U5-2;Q676U5;Q676U5-5;Q676U5-3;Q676U5-4;C9JAY7;C9J1B2;C9JK97	254;254;254;110;254;110;110;170;110	E7EVC7	Autophagy-related protein 16-1	ATG16L1	0	NaN	DIEVIVDETSDHTEETSPVRAISRAATKRLS		NaN	NaN	NaN	NaN	NaN	NaN	T	3	0.465676	4.49e-05	93.392	0	0	NaN
H7C3T2;Q2TAZ0;Q2TAZ0-3	1113;1309;1311	H7C3T2	Autophagy-related protein 2 homolog A	ATG2A	0.799386	0.756299	LRELAQPSGGHLPQASPISVYLFPGERSGAP	1	0.980391	0.0315363	0.800082	0.23634	0.948855	0.563742	S	3	0.737085	0.000639649	45.349	6.56907	1.19212	0.890236
Q96BY7	1587	Q96BY7	Autophagy-related protein 2 homolog B	ATG2B	0	NaN	SPAKSYISPHSSPSHTPTRHGRNTVCGGKGR	3	NaN	-0.241885	NaN	-0.0441962	NaN	NaN	T	2	0.880713	0.00915136	49.125	9.46581	0	NaN
Q96BY7	1743	Q96BY7	Autophagy-related protein 2 homolog B	ATG2B	1.20459	1.18739	AEVELQMTPDPEVKKSPGADVTCSLPRHLST	1	1.06233	-0.241885	1.02638	-0.0441962	1.30421	1.07057	S	2	1	0.000923463	169.4	128.538	1.9603	1.04435
Q96BY7	497	Q96BY7	Autophagy-related protein 2 homolog B	ATG2B	0.571584	1.04716	HPTPLQKTSLPSRSVSVDESRPELIFRLAVG	1	1.27447	-0.241885	0.533763	-0.0441962	1.51635	0.577959	S	2	0.999954	0.000463941	201.57	43.4004	0.606415	0.904117
Q96BY7	255	Q96BY7;REV__Q96BY7	Autophagy-related protein 2 homolog B	ATG2B	1.26301	0.668616	;SPVCSTAPVETEPKLSPSWNPKIIYEPHPQL	1	0.48419	-0.241885	0.566961	-0.0441962	0.726074	0.611158	S	2	0.99998	0.00454965	139.38	46.9543	1.3008	0.525575
Q96BY7	1582	Q96BY7	Autophagy-related protein 2 homolog B	ATG2B	0	0.552574	IVPPTSPAKSYISPHSSPSHTPTRHGRNTVC	1	0.310689	-0.241885	NaN	-0.0441962	0.552574	NaN	S	3	0.951743	9.82e-05	180.88	12.9568	0	0.310689
Q96BY7	239	Q96BY7	Autophagy-related protein 2 homolog B	ATG2B	1.81285	0.541687	SGVSLFWDEFSASAKSSPVCSTAPVETEPKL	1	0.312897	-0.241885	0.484396	-0.0441962	0.554782	0.528592	S	2	0.5	0.00133577	111.58	0	0.870045	0.398647
Q96BY7	240	Q96BY7	Autophagy-related protein 2 homolog B	ATG2B	1.42333	0.498986	GVSLFWDEFSASAKSSPVCSTAPVETEPKLS	1	0.227495	-0.241885	0.484396	-0.0441962	0.469379	0.528592	S	2	0.76246	0.00018502	149.24	5.06482	0.656633	0.355945
Q96BY7	886	Q96BY7	Autophagy-related protein 2 homolog B	ATG2B	0.257204	0.193319	ENDGHYQEEEEGGAHSLKDVCDLRRPAPSPF	1	0.18002	-0.241885	-0.0794628	-0.0441962	0.421905	-0.0352665	S	3	1	1.82e-32	318.13	221.658	0.116546	0.0502789
Q96BY7	1583	Q96BY7	Autophagy-related protein 2 homolog B	ATG2B	0.548888	0.131466	VPPTSPAKSYISPHSSPSHTPTRHGRNTVCG	1;2	-0.172929	-0.241885	0.14978	-0.0441962	0.0689556	0.193976	S	2	0.992664	1.04e-06	237.66	21.348	0.0202647	-0.0115746
Q96BY7	1579	Q96BY7	Autophagy-related protein 2 homolog B	ATG2B	0	-0.0891569	DFGIVPPTSPAKSYISPHSSPSHTPTRHGRN	1;2;3	NaN	-0.241885	-0.133353	-0.0441962	NaN	-0.0891568	S	3	0.999987	1.04e-06	237.66	49.5445	0	-0.133353
Q9Y4P1;F8WD71;F5H7P2;Q9Y4P1-4	383;309;369;321	Q9Y4P1	Cysteine protease ATG4B	ATG4B	0	NaN	SLDSSDVERLERFFDSEDEDFEILSL_____	1	NaN	0.0513026	NaN	0.00345838	NaN	NaN	S	2	0.999977	0.0435597	50.305	46.4431	0	NaN
Q7Z3C6;Q7Z3C6-2;H7C152	738;677;154	Q7Z3C6	Autophagy-related protein 9A	ATG9A	0	NaN	AEPERHVWHRRESDESGESAPDEGGEGARAP	2	NaN	0.161178	NaN	-0.422211	NaN	NaN	S	2	0.96074	0.0134534	43.156	13.8689	0	NaN
Q7Z3C6;Q7Z3C6-2;H7C152	673;612;89	Q7Z3C6	Autophagy-related protein 9A	ATG9A	0	NaN	LQPGQAPTGRAHSTMTGSGVDARTASSGSSV		NaN	0.161178	NaN	-0.422211	NaN	NaN	T	2	0.4968	0.00325405	72.315	0	0	NaN
Q7Z3C6;Q7Z3C6-2;H7C152	735;674;151	Q7Z3C6	Autophagy-related protein 9A	ATG9A	0.490119	0.664877	QAQAEPERHVWHRRESDESGESAPDEGGEGA	1;2	0.455755	0.161178	0.612966	-0.422211	0.294576	1.03518	S	2	0.999939	5.37e-06	179	42.3288	1.0316	0.53436
Q7Z3C6;Q7Z3C6-2;H7C152	761;700;177	Q7Z3C6	Autophagy-related protein 9A	ATG9A	0.423525	0.430815	GGEGARAPQSIPRSASYPCAAPRPGAPETTA	1	0.302056	0.161178	0.298541	-0.422211	0.140878	0.720752	S	2	0.99982	2.52e-06	142.09	38.2043	2.42881	0.300298
Q7Z3C6;Q7Z3C6-2;H7C152	675;614;91	Q7Z3C6	Autophagy-related protein 9A	ATG9A	0.371609	0.261892	PGQAPTGRAHSTMTGSGVDARTASSGSSVWE	1	0.21661	0.161178	0.0461418	-0.422211	0.0554318	0.468353	S	2	0.995359	0.000299609	203.92	23.3577	0.436062	0.131376
Q7Z3C6;Q7Z3C6-2;H7C152;H7C1G6	656;595;72;215	Q7Z3C6	Autophagy-related protein 9A	ATG9A	0.146653	0.146819	GSRHRAEVASALRSFSPLQPGQAPTGRAHST	1	0.00417777	0.161178	0.0284276	-0.422211	-0.157	0.450639	S	2	0.999511	0.00104176	135.95	33.1074	0.390292	0.0163027
Q7Z3C6;Q7Z3C6-3;C9JS65;C9JFV2;F2Z3I6;C9JX27;C9IYZ9;C9JKV7;C9JDK4;C9JXG2	14;14;14;14;14;14;14;14;14;14	Q7Z3C6	Autophagy-related protein 9A	ATG9A	0.00595276	-0.00792229	__MAQFDTEYQRLEASYSDSPPGEEDLLVHV	1	-0.217172	0.161178	-0.0597054	-0.422211	-0.37835	0.362506	S	3	0.999301	8.08e-09	172.95	31.5734	0.482542	-0.138439
Q7Z3C6;Q7Z3C6-2;H7C152	828;767;244	Q7Z3C6	Autophagy-related protein 9A	ATG9A	0.391219	-0.434737	GQSASRHPEPVPEEGSEDELPPQVHKV____	1	-0.595969	0.161178	-0.534537	-0.422211	-0.757147	-0.112326	S	2	1	1.89e-10	215.79	90.4751	1.46143	-0.565253
Q7Z3C6;Q7Z3C6-3;C9JS65;C9JFV2;F2Z3I6;C9JX27;C9IYZ9;C9JKV7;C9JDK4;C9JXG2	18;18;18;18;18;18;18;18;18;18	Q7Z3C6	Autophagy-related protein 9A	ATG9A	1.5807	-0.563481	QFDTEYQRLEASYSDSPPGEEDLLVHVAEGS	1	-0.425559	0.161178	-0.962435	-0.422211	-0.586738	-0.540224	S	2	0.997618	2.07e-08	181.31	26.2237	0.629005	-0.693997
S4R336;S4R430;Q674R7-2;Q674R7	349;863;350;864	S4R336	Autophagy-related protein 9B	ATG9B	0	NaN	EPWGEAAASILSRPCSSPSQPPSPDEEKPSW	2	NaN	NaN	NaN	NaN	NaN	NaN	S	2	0.526531	0.0133678	50.178	0.641136	0	NaN
S4R336;S4R430;Q674R7-2;Q674R7	350;864;351;865	S4R336	Autophagy-related protein 9B	ATG9B	0	NaN	PWGEAAASILSRPCSSPSQPPSPDEEKPSWS	2	NaN	NaN	NaN	NaN	NaN	NaN	S	2	0.556998	0.0133678	50.178	0.990252	0	NaN
F8WD04;Q8WXF7-2;Q8WXF7;G3V321;G3V5T4	10;10;10;10;10	F8WD04	Atlastin-1	ATL1	0	1.53818	______MAKNRRDRNSWGGFSEKTYEWSSEE	1	1.44885	NaN	1.48166	-0.0565212	NaN	1.53818	S	2	1	0.00716577	179.81	65.1315	2.14704	1.46525
C9JC25;F8WEN4	24;24	C9JC25		ATL2	0	NaN	RGQQPHQGLWRRRRTSDPSAAVNHVSSTTSL	1	0.130667	NaN	0.339365	NaN	NaN	NaN	S	3	0.616325	1.65e-05	91.687	3.63192	0.57509	0.235016
Q8NHH9;Q8NHH9-2;H7C3A2	23;23;22	Q8NHH9	Atlastin-2	ATL2	0	NaN	ARGQQPHQGLWRRRRTSDPSAAVNHVSSTTS		NaN	-0.0715425	NaN	-0.0630172	NaN	NaN	T	3	0.496952	1.45e-99	423.07	0	0	NaN
Q8NHH9;Q8NHH9-2;H7C3A2	24;24;23	Q8NHH9	Atlastin-2	ATL2	1.04766	0.243223	RGQQPHQGLWRRRRTSDPSAAVNHVSSTTSL	1	0.206143	-0.0715425	0.145743	-0.0630172	0.277685	0.20876	S	3	0.950735	5.4e-142	475.49	12.9748	0.965694	0.175943
Q8NHH9;Q8NHH9-2;H7C3A2	27;27;26	Q8NHH9	Atlastin-2	ATL2	1.13296	0.202358	QPHQGLWRRRRTSDPSAAVNHVSSTTSLGEN	1	0.154324	-0.0715425	0.115832	-0.0630172	0.225866	0.17885	S	3	0.513372	1.08e-06	142.6	1.27207	1.04528	0.135078
F5H6I7;Q6DD88;C9JUU1	517;535;562	F5H6I7	Atlastin-3	ATL3	0	0.511641	NSTQATVRDAVVGRPSMDKKAQ_________	1	0.546561	0.03492	NaN	0.013498	0.511641	NaN	S	2	1	0.0132735	111.64	111.643	0	0.546561
Q13315	1981	Q13315	Serine-protein kinase ATM	ATM	0	0.319916	SMDDQEKRSLAFEEGSQSTTISSLSEKSKEE	1	0.252294	-0.0676213	NaN	-0.146899	0.319916	NaN	S	2	0.74915	0.00145077	82.885	5.99645	0	0.252295
P54259	645	P54259	Atrophin-1	ATN1	0	NaN	TASPPGPPPYGKRAPSPGAYKTATPPGYKPG	1	0.220825	NaN	-0.27289	NaN	NaN	NaN	S	2	0.999995	0.00287484	79.311	52.9267	0.0300659	-0.0260323
P54259	34	P54259	Atrophin-1	ATN1	0	NaN	EAPGPREELRSRGRASPGGVSTSSSDGKAEK	1	NaN	NaN	1.3072	NaN	NaN	NaN	S	2	0.999792	0.0015191	158.75	38.5056	0	1.3072
P54259	896	P54259	Atrophin-1	ATN1	0	NaN	PALRTLSEYARPHVMSPGNRNHPFYVPLGAV	1	0.498149	NaN	0.181548	NaN	NaN	NaN	S	2	1	0.0204614	60.301	42.976	0.55672	0.339848
P54259	168	P54259	Atrophin-1	ATN1	0	NaN	QGPARPYHPPPLFPPSPQPPDSTPRQPEASF	1	-0.317211	NaN	-0.602175	NaN	NaN	NaN	S	3	0.999977	0.000243963	75.524	49.8396	0.718188	-0.459693
P54259	739	P54259	Atrophin-1	ATN1	0	NaN	TQIKQEPAEEYETPESPVPPARSPSPPPKVV	3	NaN	NaN	NaN	NaN	NaN	NaN	S	3	0.990525	3.25e-05	115.87	19.7549	0	NaN
P54259	746	P54259	Atrophin-1	ATN1	0	NaN	AEEYETPESPVPPARSPSPPPKVVDVPSHAS	3	NaN	NaN	NaN	NaN	NaN	NaN	S	3	0.901408	3.25e-05	115.87	9.51066	0	NaN
P54259	748	P54259	Atrophin-1	ATN1	0	NaN	EYETPESPVPPARSPSPPPKVVDVPSHASQS	3	NaN	NaN	NaN	NaN	NaN	NaN	S	3	0.98704	3.25e-05	115.87	18.322	0	NaN
P54259	77	P54259	Atrophin-1	ATN1	0	NaN	ASTPKVNKQGRSEEISESESEETNAPKKTKT	2	NaN	NaN	NaN	NaN	NaN	NaN	S	2	1	1.94e-07	249.07	72.5588	0	NaN
P54259	79	P54259	Atrophin-1	ATN1	0	NaN	TPKVNKQGRSEEISESESEETNAPKKTKTEQ	2	NaN	NaN	NaN	NaN	NaN	NaN	S	2	0.999985	1.94e-07	249.07	48.2574	0	NaN
P54259	112	P54259	Atrophin-1	ATN1	0	NaN	PRPQSPSDLDSLDGRSLNDDGSSDPRDIDQD	1	NaN	NaN	1.1818	NaN	NaN	NaN	S	2	0.999905	0.0279929	53.3	43.2283	0	1.1818
P54259	632	P54259	Atrophin-1	ATN1	0	NaN	VIATVASSPAGYKTASPPGPPPYGKRAPSPG	1	0.115566	NaN	NaN	NaN	NaN	NaN	S	2	0.957175	0.0269873	50.641	13.4975	0	0.115566
P54259	101	P54259	Atrophin-1	ATN1	0	NaN	APKKTKTEQELPRPQSPSDLDSLDGRSLNDD	2	NaN	NaN	NaN	NaN	NaN	NaN	S	3	0.927753	0.000296694	72.474	10.9856	0	NaN
P54259	107	P54259	Atrophin-1	ATN1	0	NaN	TEQELPRPQSPSDLDSLDGRSLNDDGSSDPR	2	NaN	NaN	NaN	NaN	NaN	NaN	S	3	0.978757	0.000296694	72.474	16.3016	0	NaN
E5RIM7;O00244;E5RGN3	52;47;38	E5RIM7	Copper transport protein ATOX1	ATOX1	0.869194	-1.03226	DIDLPNKKVCIESEHSMDTLLATLKKTGKTV	1	-0.835626	-0.0258525	-1.42221	-0.167458	-0.809773	-1.25475	S	2	0.99547	6.42e-05	145.02	23.8108	0.790978	-1.12892
Q9Y2G3	1154	Q9Y2G3	Probable phospholipid-transporting ATPase IF	ATP11B	0	NaN	RVIGRCSPTHISRSWSASDPFYTNDRSILTL	1	0.688046	NaN	0.561008	NaN	NaN	NaN	S	2	0.988708	0.00152915	104.2	21.6056	1.19026	0.624527
Q8NB49;H7C113	1126;159	Q8NB49	Phospholipid-transporting ATPase IG	ATP11C	0	NaN	LSARPSVRPLLLRTFSDESNVL_________	2	NaN	-0.00252692	NaN	-0.143006	NaN	NaN	S	2	0.972482	0.0381411	57.164	15.4803	0	NaN
Q8NB49;H7C113	1129;162	Q8NB49	Phospholipid-transporting ATPase IG	ATP11C	0	NaN	RPSVRPLLLRTFSDESNVL____________	2	NaN	-0.00252692	NaN	-0.143006	NaN	NaN	S	2	0.999491	0.0381411	57.164	32.8124	0	NaN
Q8NB49;H7C113	1108;141	Q8NB49	Phospholipid-transporting ATPase IG	ATP11C	0.476819	0.356461	VRRRSARRNLSCRRASDSLSARPSVRPLLLR	1	0.147958	-0.00252692	0.419431	-0.143006	0.150485	0.562437	S	2	0.997124	0.00100697	189.56	27.5422	0.546524	0.283694
Q8NB49;Q8NB49-2;Q8NB49-3;Q8NB49-4;H7C0E8	445;445;445;445;21	Q8NB49	Phospholipid-transporting ATPase IG	ATP11C	0.298555	-0.187149	DGHKYKGVTQEVDGLSQTDGTLTYFDKVDKN	1	-0.378513	-0.00252692	-0.141319	-0.143006	-0.375986	0.0016877	S	2	0.998551	2.92e-06	223.18	28.4139	0.564602	-0.259916
Q9HD20-2;Q9HD20;Q9HD20-3	781;899;39	Q9HD20-2	Manganese-transporting ATPase 13A1	ATP13A1	0.931592	-0.0413773	NAPERVVERRRRPRDSPTLSNSGIRATSRTA	1	-0.291486	-0.257804	-0.224671	-0.175599	-0.033682	-0.0490725	S	2	0.999652	0.005522	94.781	34.5891	1.08644	-0.258079
Q9H7F0-2;Q9H7F0	540;817	Q9H7F0-2	Probable cation-transporting ATPase 13A3	ATP13A3	0	NaN	SAIDPEAIPVKLVHDSLEDLQMTRYHFAMNG	1	0.37529	NaN	0.678883	NaN	NaN	NaN	S	2	0.999149	0.011799	58.864	30.6978	0.748335	0.527086
P05023-4;P05023;P05023-2	16;16;16	P05023-4	Sodium/potassium-transporting ATPase subunit alpha-1	ATP1A1	0.544378	0.18242	MAFKVGRDKYEPAAVSEQGDKKGKKGKKDRD	1	0.214995	0.120352	0.3744	0.104203	0.0946431	0.270197	S	2	1	0.000182261	160.95	110.925	0.774293	0.294697
M0R116;P13637;P13637-2;P13637-3;P05023-4;P05023;P05023-3	613;643;654;656;653;653;622	M0R116;P05023-4	Sodium/potassium-transporting ATPase subunit alpha-3;Sodium/potassium-transporting ATPase subunit alpha-1	ATP1A3;ATP1A1	0.496355	0.14439	NETVEDIAARLNIPVSQVNPRDAKACVIHGT;NETVEDIAARLNIPVSQVNPRDAKACVVHGS	1	0.321351	0.097908	0.16954	0.104203	0.223443	0.0653377	S	2	1	0.0100814	76.759	76.7593	0.719105	0.245446
M0R116;P13637;P13637-2;P13637-3;P05023-4;P05023;P05023-3;P05023-2;B1AKY9;P50993;P20648	177;207;218;220;217;217;186;217;215;215;228	M0R116;P05023-4	Sodium/potassium-transporting ATPase subunit alpha-3;Sodium/potassium-transporting ATPase subunit alpha-1;Sodium/potassium-transporting ATPase subunit alpha-2;Potassium-transporting ATPase alpha chain 1	ATP1A3;ATP1A1;ATP1A2;ATP4A	0	-0.139993	DLRIISAHGCKVDNSSLTGESEPQTRSPDCT;DLRIISANGCKVDNSSLTGESEPQTRSPDFT	1	-0.0420854	0.097908	NaN	0.104203	-0.139993	NaN	S	2	0.922896	0.00141811	104.84	10.8316	0	-0.0420854
P16615;P16615-5;P16615-2;P16615-3;P16615-4;H7C5W9	663;663;663;663;636;554	P16615	Sarcoplasmic/endoplasmic reticulum calcium ATPase 2	ATP2A2	0.353073	-0.224174	TSKAFTGREFDELNPSAQRDACLNARCFARV	1	-0.700943	-0.28921	-0.36563	-0.329015	-0.411733	-0.036615	S	2	1	0.00168548	145.43	145.428	0.71239	-0.533286
P20020-6;P20020-3;P20020-4;P20020;E7ERY9	1141;1177;1206;1215;920	P20020-6	Plasma membrane calcium-transporting ATPase 1;Calcium-transporting ATPase	ATP2B1	0	NaN	IDDTDAEDDAPTKRNSSPPPSPNKNNNAVDS	2;3	NaN	0.124461	NaN	0.160017	NaN	NaN	S	2	1	0.00201588	95.662	75.674	0	NaN
P20020-6;P20020-3;P20020-4;P20020;E7ERY9	1142;1178;1207;1216;921	P20020-6	Plasma membrane calcium-transporting ATPase 1;Calcium-transporting ATPase	ATP2B1	0	NaN	DDTDAEDDAPTKRNSSPPPSPNKNNNAVDSG	2;3	NaN	0.124461	NaN	0.160017	NaN	NaN	S	2	1	0.00122744	149.12	75.674	0	NaN
P20020-6;P20020-3;P20020-4;P20020;E7ERY9	1146;1182;1211;1220;925	P20020-6	Plasma membrane calcium-transporting ATPase 1;Calcium-transporting ATPase	ATP2B1	0	NaN	AEDDAPTKRNSSPPPSPNKNNNAVDSGIHLT	2;3	NaN	0.124461	NaN	0.160017	NaN	NaN	S	2	1	0.00122744	149.12	75.674	0	NaN
P20020-6;P20020-3;P20020-4;P20020;E7ERY9;H0YHH6	1103;1139;1168;1177;882;120	P20020-6	Plasma membrane calcium-transporting ATPase 1;Calcium-transporting ATPase	ATP2B1	2.67976	0.880087	FRSSLYEGLEKPESRSSIHNFMTHPEFRIED	1	1.00166	0.124461	1.04299	0.160017	0.877197	0.882977	S	3	0.5	0.000196299	176.49	0	1.89047	1.02233
P20020-6;P20020-3;P20020-4;P20020;E7ERY9;H0YHH6	1104;1140;1169;1178;883;121	P20020-6	Plasma membrane calcium-transporting ATPase 1;Calcium-transporting ATPase	ATP2B1	1.54644	0.825922	RSSLYEGLEKPESRSSIHNFMTHPEFRIEDS	1	0.913493	0.124461	1.02283	0.160017	0.789032	0.862812	S	3	0.838155	0.000196299	176.49	7.14224	1.44479	0.968161
P20020-6;P20020-3;P20020-4;P20020;E7ERY9;H0YHH6	1129;1165;1194;1203;908;146	P20020-6	Plasma membrane calcium-transporting ATPase 1;Calcium-transporting ATPase	ATP2B1	1.17174	-0.237485	FRIEDSEPHIPLIDDTDAEDDAPTKRNSSPP	1;2	-0.0878101	0.124461	-0.102682	0.160017	-0.212271	-0.262699	T	3	1	2.82e-17	237.58	64.4683	1.30451	-0.0952461
P20020-6;P20020-3;P20020-4;P20020;E7ERY9;H0YHH6	1119;1155;1184;1193;898;136	P20020-6	Plasma membrane calcium-transporting ATPase 1;Calcium-transporting ATPase	ATP2B1	1.11461	-0.29331	SIHNFMTHPEFRIEDSEPHIPLIDDTDAEDD	1;2	-0.13329	0.124461	-0.168852	0.160017	-0.25775	-0.328869	S	3	1	1.51e-25	293.88	85.6215	1.12733	-0.151071
P20020-6;P20020-3;P20020-4;P20020;E7ERY9;H0Y7S3;Q01814-6;Q01814-8;Q01814-5;Q01814;H0YHH6	1101;1137;1166;1175;880;1016;1115;1129;1146;1160;118	P20020-6	Plasma membrane calcium-transporting ATPase 1;Calcium-transporting ATPase;Plasma membrane calcium-transporting ATPase 2	ATP2B1;ATP2B2	0.559909	0.460571	NAFRSSLYEGLEKPESRSSIHNFMTHPEFRI	1	0.372283	0.124461	0.833336	0.160017	0.247823	0.673319	S	2	1	0.00124881	204.37	143.858	0.633519	0.602809
P98194-4;P98194;P98194-6;E7ERC6;H0Y9V7	898;914;914;859;868	P98194-4	Calcium-transporting ATPase type 2C member 1	ATP2C1	0	NaN	ERSREKIQKHVSSTSSSFLEV__________		NaN	NaN	NaN	NaN	NaN	NaN	S	2	0.459198	0.00563578	76.073	0	0	NaN
P98194-4;P98194;P98194-6;E7ERC6;H0Y9V7	899;915;915;860;869	P98194-4	Calcium-transporting ATPase type 2C member 1	ATP2C1	0	NaN	RSREKIQKHVSSTSSSFLEV___________		NaN	NaN	NaN	NaN	NaN	NaN	S	2	0.459198	0.00563578	76.073	0	0	NaN
P98194-4;P98194;P98194-2;P98194-3;P98194-5;P98194-6;P98194-7;H0Y9S7;E7ERC6;H0Y9V7;P98194-8	605;621;621;605;621;621;655;139;566;575;616	P98194-4	Calcium-transporting ATPase type 2C member 1	ATP2C1	0	NaN	QLSQIVPKVAVFYRASPRHKMKIIKSLQKNG	2	NaN	NaN	NaN	NaN	NaN	NaN	S	2	1	0.0218112	50.222	50.2222	0	NaN
P98194-4;P98194;P98194-2;P98194-3;P98194-5;P98194-6;P98194-7;H0Y9S7;E7ERC6;H0Y9V7;P98194-8	602;618;618;602;618;618;652;136;563;572;613	P98194-4	Calcium-transporting ATPase type 2C member 1	ATP2C1	0	NaN	DVQQLSQIVPKVAVFYRASPRHKMKIIKSLQ	2	NaN	NaN	NaN	NaN	NaN	NaN	Y	2	1	0.0218112	50.222	50.2222	0	NaN
P25705;K7ENP3;K7ENJ4;K7ERX7;K7ESA0;K7EM08	39;39;39;39;39;39	P25705	ATP synthase subunit alpha, mitochondrial	ATP5A1	0	2.46903	NALGSSFIAARNFHASNTHLQKTGTAEMSSI	1	NaN	-0.037636	2.40928	-0.0597506	NaN	2.46903	S	2	0.5	0.0169544	67.997	0	0	2.40928
P25705;K7ENP3;K7ENJ4;K7ERX7;K7ESA0;K7EM08	41;41;41;41;41;41	P25705	ATP synthase subunit alpha, mitochondrial	ATP5A1	0	2.46903	LGSSFIAARNFHASNTHLQKTGTAEMSSILE	1	NaN	-0.037636	2.40928	-0.0597506	NaN	2.46903	T	2	0.5	0.0169544	67.997	0	0	2.40928
P06576;F8VPV9;F8VQY0	465;454;168	P06576	ATP synthase subunit beta, mitochondrial	ATP5B	0	3.39904	DKLTVSRARKIQRFLSQPFQVAEVFTGHMGK	1	NaN	-0.10135	3.32031	-0.0787313	NaN	3.39904	S	3	1	6.65e-05	115.85	103.399	0	3.32031
P06576;F8VPV9;F8W0P7;F8VQY0	51;51;51;51	P06576	ATP synthase subunit beta, mitochondrial	ATP5B	0	2.62825	APTAVHPVRDYAAQTSPSPKAGAATGRIVAV	1	2.5269	-0.10135	NaN	-0.0787313	2.62825	NaN	S	2	0.935621	0.000482249	121.45	13.4547	0	2.5269
P36542;B4DL14;P36542-2	146;99;146	P36542	ATP synthase subunit gamma, mitochondrial;ATP synthase subunit gamma	ATP5C1	0	0.943491	VGIGDKIRGILYRTHSDQFLVAFKEVGRKPP	1	0.961697	0.0182068	NaN	0.0487942	0.943491	NaN	S	2	0.997465	0.00053585	126.31	25.9488	0	0.961697
Q9Y487	695	Q9Y487	V-type proton ATPase 116 kDa subunit a isoform 2	ATP6V0A2	1.41584	0.445557	CFGVNRSGYTLIRKDSEEEVSLLGSQDIEEG	1	0.302875	-0.115785	0.386038	-0.0864154	0.41866	0.472454	S	3	1	2.39e-68	398.63	81.041	1.11645	0.344457
O75348;F2Z307;O95670-2;O95670	3;3;3;3	O75348	V-type proton ATPase subunit G 1;V-type proton ATPase subunit G 2	ATP6V1G1;ATP6V1G2-DDX39B;ATP6V1G2	0	0.0557899	_____________MASQSQGIQQLLQAEKRA	1	NaN	0.241108	0.296898	0.241108	NaN	0.0557899	S	2	0.5	0.0132519	56.514	0	0	0.296898
O75348;F2Z307;O95670-2;O95670	5;5;5;5	O75348	V-type proton ATPase subunit G 1;V-type proton ATPase subunit G 2	ATP6V1G1;ATP6V1G2-DDX39B;ATP6V1G2	0	0.0557899	___________MASQSQGIQQLLQAEKRAAE	1	NaN	0.241108	0.296898	0.241108	NaN	0.0557899	S	2	0.5	0.0132519	56.514	0	0	0.296898
Q04656-5;Q04656;Q04656-2;Q04656-3;Q04656-4	1366;1444;1458;1525;447	Q04656-5	Copper-transporting ATPase 1	ATP7A	0	NaN	KSPSEISVHVGIDDTSRNSPKLGLLDRIVNY		NaN	0.196607	NaN	0.1038	NaN	NaN	S	3	0.333333	2.07e-05	136.57	0	0	NaN
Q04656-5;Q04656;Q04656-2;Q04656-3;Q04656-4	1369;1447;1461;1528;450	Q04656-5	Copper-transporting ATPase 1	ATP7A	0	NaN	SEISVHVGIDDTSRNSPKLGLLDRIVNYSRA		NaN	0.196607	NaN	0.1038	NaN	NaN	S	3	0.333333	2.07e-05	136.57	0	0	NaN
Q04656-5;Q04656;Q04656-2;Q04656-3;Q04656-4	1365;1443;1457;1524;446	Q04656-5	Copper-transporting ATPase 1	ATP7A	0	NaN	QKSPSEISVHVGIDDTSRNSPKLGLLDRIVN		NaN	0.196607	NaN	0.1038	NaN	NaN	T	3	0.333333	2.07e-05	136.57	0	0	NaN
Q04656-5;Q04656;Q04656-2;Q04656-3	270;270;284;351	Q04656-5	Copper-transporting ATPase 1	ATP7A	1.10462	1.17495	LKNTPVKSSEGSQQRSPSYTNDSTATFIIDG	1	1.22577	0.196607	1.42455	0.1038	1.02916	1.32075	S	3	0.99686	3.4e-24	318.18	25.0176	1.32186	1.32516
Q04656-5;Q04656;Q04656-2;Q04656-3	357;357;371;438	Q04656-5	Copper-transporting ATPase 1	ATP7A	0.796965	0.863464	LYRVSITSEVESTSNSPSSSSLQKIPLNVVS	1	1.28119	0.196607	0.746141	0.1038	1.08459	0.642341	S	2	0.971235	1.81e-07	181.33	17.8655	0.78444	1.01367
Q04656-5;Q04656;Q04656-2;Q04656-3	327;327;341;408	Q04656-5	Copper-transporting ATPase 1	ATP7A	0	-0.930594	LENRSAIVKYNASSVTPESLRKAIEAVSPGL	1	-0.733987	0.196607	NaN	0.1038	-0.930594	NaN	T	2	0.941095	0.0144764	75.018	12.9626	0	-0.733987
F5H562;E7ET55;F5H748;P35670-2;P35670-3;P35670-4;P35670;E7EQQ2	968;1320;1333;1191;1287;1380;1398;609	F5H562	Copper-transporting ATPase 2;WND/140 kDa	ATP7B	0	NaN	RYEAQAHGHMKPLTASQVSVHIGMDDRWRDS	2	NaN	NaN	NaN	NaN	NaN	NaN	S	3	0.999062	0.000293403	118.51	30.2723	0	NaN
F5H562;E7ET55;F5H748;P35670-2;P35670-3;P35670-4;P35670;E7EQQ2	971;1323;1336;1194;1290;1383;1401;612	F5H562	Copper-transporting ATPase 2;WND/140 kDa	ATP7B	0	NaN	AQAHGHMKPLTASQVSVHIGMDDRWRDSPRA	2	NaN	NaN	NaN	NaN	NaN	NaN	S	3	0.999993	0.000293403	118.51	51.4018	0	NaN
P98198;P98198-3	1169;1183	P98198	Phospholipid-transporting ATPase ID	ATP8B2	0	NaN	EGFGELIMSGKNMRLSSLALSSFTTRSSSSW	1	-0.035594	NaN	NaN	NaN	NaN	NaN	S	2	0.830034	0.00301487	87.519	6.88733	0	-0.035594
Q13535-2;Q13535-3;Q13535;D6RIG7	436;436;436;117	Q13535-2	Serine/threonine-protein kinase ATR	ATR	0	NaN	SSNSDGISPKRRRLSSSLNPSKRAPKQTEDR	2	NaN	-0.439168	NaN	-0.211916	NaN	NaN	S	2	0.964461	0.00164739	146.84	14.3352	0	NaN
Q13535-2;Q13535-3;Q13535;D6RIG7	437;437;437;118	Q13535-2	Serine/threonine-protein kinase ATR	ATR	0	NaN	SNSDGISPKRRRLSSSLNPSKRAPKQTEDRT	2	NaN	-0.439168	NaN	-0.211916	NaN	NaN	S	2	0.555828	0.0246792	41.621	0	0	NaN
Q13535-2;Q13535-3;Q13535;D6RIG7	435;435;435;116	Q13535-2	Serine/threonine-protein kinase ATR	ATR	1.41388	0.989574	LSSNSDGISPKRRRLSSSLNPSKRAPKQTED	1;2	0.610417	-0.439168	0.717649	-0.211916	1.04958	0.929565	S	2	0.999867	0.00164739	180.85	38.6114	1.28995	0.664033
Q13535-2;Q13535-3;Q13535	888;952;952	Q13535-2	Serine/threonine-protein kinase ATR	ATR	0	0.0391982	LVESLHSSQMTALPNTPCQNADVRKQDVAHQ	1	NaN	-0.439168	-0.172717	-0.211916	NaN	0.0391982	T	4	0.996076	0.000788698	43.804	27.4355	0	-0.172717
Q13535-2;Q13535-3;Q13535	1812;1876;1876	Q13535-2	Serine/threonine-protein kinase ATR	ATR	3.22437	-0.298077	EHSIKPLFQHSPGDSSQEDSLNWVARLEMTQ	1	-0.736966	-0.439168	-0.510272	-0.211916	-0.297798	-0.298356	S	3	0.907215	2.91e-08	185.64	9.90238	0.941345	-0.623619
Q13535-2;Q13535-3;Q13535	1925;1989;1989	Q13535-2	Serine/threonine-protein kinase ATR	ATR	1.13308	-0.307569	IVLQKGVELCFPENETPPEGKNMLIHGRAML	1	-0.711016	-0.439168	-0.555206	-0.211916	-0.271848	-0.34329	T	2	1	0.000846209	127.32	102.978	1.10821	-0.633111
Q8WXE1-5;Q8WXE1-3;Q8WXE1-2;Q8WXE1;C9IZM8	112;146;239;239;146	Q8WXE1-5	ATR-interacting protein	ATRIP	0	NaN	SPRKNPSVVIKPEACSPQFGKTSFPTKESFS	1	-0.0805302	NaN	0.293135	NaN	NaN	NaN	S	2	1	7.55e-07	220.33	89.4222	0.173483	0.106302
Q8WXE1-5;Q8WXE1-3;Q8WXE1-2;Q8WXE1;C9IZM8	97;131;224;224;131	Q8WXE1-5	ATR-interacting protein	ATRIP	0	NaN	SERANKLAAPSVSHVSPRKNPSVVIKPEACS	1	-0.242413	NaN	-0.415634	NaN	NaN	NaN	S	2	0.999992	0.000441805	186.7	51.2017	0.78552	-0.329024
Q8WXE1-5;Q8WXE1-3;Q8WXE1-2;Q8WXE1	391;425;518;518	Q8WXE1-5	ATR-interacting protein	ATRIP	0	NaN	DSAAGEGNRSLVHRLSDGDMTSALRGVADDQ	1	0.349818	NaN	0.311852	NaN	NaN	NaN	S	2	1	0.00489753	98.253	67.9245	1.43784	0.330835
P46100;P46100-4;P46100-3;P46100-5;P46100-2	1990;1952;1873;1835;1786	P46100	Transcriptional regulator ATRX	ATRX	0	NaN	NNPSVSLKLEESKATSSSNPSSPAPDWYKDF	2	NaN	-0.342799	NaN	-0.212517	NaN	NaN	S	2	0.783042	0.000812973	93.255	8.03118	0	NaN
P46100;P46100-4;P46100-3;P46100-5;P46100-2	1991;1953;1874;1836;1787	P46100	Transcriptional regulator ATRX	ATRX	0	NaN	NPSVSLKLEESKATSSSNPSSPAPDWYKDFV		NaN	-0.342799	NaN	-0.212517	NaN	NaN	S	2	0.48017	0.00763039	56.719	0.637788	0	NaN
P46100;P46100-4;P46100-3;P46100-5;P46100-2;P46100-6	849;811;732;694;645;781	P46100;P46100-6	Transcriptional regulator ATRX	ATRX	0	NaN	ARTTKKRIPNTKDFDSSEDEKHSKKGMDNQG	2	NaN	-0.342799	NaN	-0.212517	NaN	NaN	S	2	1	0.00234503	72.681	72.6812	0	NaN
P46100;P46100-4;P46100-3;P46100-5;P46100-2;P46100-6	850;812;733;695;646;782	P46100;P46100-6	Transcriptional regulator ATRX	ATRX	0	NaN	RTTKKRIPNTKDFDSSEDEKHSKKGMDNQGH	2	NaN	-0.342799	NaN	-0.212517	NaN	NaN	S	2	1	0.00234503	72.681	72.6812	0	NaN
P46100;P46100-4;P46100-3;P46100-5;P46100-2;P46100-6	890;852;773;735;686;822	P46100;P46100-6	Transcriptional regulator ATRX	ATRX	0	NaN	SSDDAERKQERETFSSAEGTVDKDTTIMELR	2	NaN	-0.342799	NaN	-0.212517	NaN	NaN	S	2	0.997316	0.00265092	92.439	26.4899	0	NaN
P46100;P46100-4;P46100-3;P46100-5;P46100-2;P46100-6	1244;1206;1127;1089;1040;1176	P46100;P46100-6	Transcriptional regulator ATRX	ATRX	0	NaN	VTENLVLSSHTGFCQSSGDEALSKSVPVTVD	2	NaN	-0.342799	NaN	-0.212517	NaN	NaN	S	3	0.997792	1.11e-08	159.78	27.0803	0	NaN
P46100;P46100-4;P46100-3;P46100-5;P46100-2;P46100-6	1245;1207;1128;1090;1041;1177	P46100;P46100-6	Transcriptional regulator ATRX	ATRX	0	NaN	TENLVLSSHTGFCQSSGDEALSKSVPVTVDD	2	NaN	-0.342799	NaN	-0.212517	NaN	NaN	S	3	0.997494	1.11e-08	159.78	26.4724	0	NaN
P46100;P46100-4;P46100-3;P46100-5;P46100-2	594;556;477;439;390	P46100	Transcriptional regulator ATRX	ATRX	0	NaN	TAKVTKELYVKLTPVSLSNSPIKGADCQEVP	2	NaN	-0.342799	NaN	-0.212517	NaN	NaN	S	2	0.999036	0.00134715	130.27	30.2288	0	NaN
P46100;P46100-4;P46100-3;P46100-5;P46100-2	596;558;479;441;392	P46100	Transcriptional regulator ATRX	ATRX	0	NaN	KVTKELYVKLTPVSLSNSPIKGADCQEVPQD	2	NaN	-0.342799	NaN	-0.212517	NaN	NaN	S	2	0.500668	0.00388908	80.738	0	0	NaN
P46100;P46100-4;P46100-3;P46100-5;P46100-2;P46100-6	1348;1310;1231;1193;1144;1280	P46100;P46100-6	Transcriptional regulator ATRX	ATRX	0	NaN	KPRYRHRLLRHKLTVSDGESGEEKKTKPKEH	2	NaN	-0.342799	NaN	-0.212517	NaN	NaN	S	2	0.999988	5.18e-05	231.82	49.3509	0	NaN
P46100;P46100-4;P46100-3;P46100-5;P46100-2;P46100-6	1352;1314;1235;1197;1148;1284	P46100;P46100-6	Transcriptional regulator ATRX	ATRX	0	NaN	RHRLLRHKLTVSDGESGEEKKTKPKEHKEVK	2	NaN	-0.342799	NaN	-0.212517	NaN	NaN	S	2	1	5.18e-05	231.82	134.331	0	NaN
P46100;P46100-4;P46100-3;P46100-5;P46100-2;P46100-6	706;668;589;551;502;638	P46100;P46100-6	Transcriptional regulator ATRX	ATRX	0	NaN	LSVPVRKKDKRNSSDSAIDNPKPNKLPKSKQ	2	NaN	-0.342799	NaN	-0.212517	NaN	NaN	S	2	0.999021	0.000585323	159.5	30.083	0	NaN
P46100;P46100-4;P46100-3;P46100-5;P46100-2;P46100-6	729;691;612;574;525;661	P46100;P46100-6	Transcriptional regulator ATRX	ATRX	0	NaN	NKLPKSKQSETVDQNSDSDEMLAILKEVSRM	2	NaN	-0.342799	NaN	-0.212517	NaN	NaN	S	2	0.999985	0.000305075	98.627	50.8209	0	NaN
P46100;P46100-4;P46100-3;P46100-5;P46100-2;P46100-6	731;693;614;576;527;663	P46100;P46100-6	Transcriptional regulator ATRX	ATRX	0	NaN	LPKSKQSETVDQNSDSDEMLAILKEVSRMSH	2	NaN	-0.342799	NaN	-0.212517	NaN	NaN	S	2	0.999999	0.000305075	98.627	63.9524	0	NaN
P46100;P46100-4;P46100-3;P46100-5;P46100-2;P46100-6	704;666;587;549;500;636	P46100;P46100-6	Transcriptional regulator ATRX	ATRX	0	2.2116	QKLSVPVRKKDKRNSSDSAIDNPKPNKLPKS	1;2	1.86881	-0.342799	NaN	-0.212517	2.2116	NaN	S	2	0.99802	0.00209852	107.92	28.0582	0	1.86881
P46100;P46100-4;P46100-3;P46100-5;P46100-2;P46100-6	784;746;667;629;580;716	P46100;P46100-6	Transcriptional regulator ATRX	ATRX	1.17598	0.548527	TQAGKDDKGKRKRKSSTSGSDFDTKKGKSAK	1	0.263395	-0.342799	0.278342	-0.212517	0.606194	0.490859	S	2	0.825812	0.00113336	161.8	7.3403	1.75547	0.270868
P46100;P46100-4;P46100-3;P46100-5;P46100-2;P46100-6	313;275;196;158;109;274	P46100;P46100-6	Transcriptional regulator ATRX	ATRX	0	0.411514	IKVDSEKSNKVYEHTSRFSPKKTSSNCNGEE	1	NaN	-0.342799	0.198997	-0.212517	NaN	0.411514	S	3	0.654251	0.000782873	111.79	2.79578	0	0.198997
P46100;P46100-4;P46100-3;P46100-5;P46100-2;P46100-6	703;665;586;548;499;635	P46100;P46100-6	Transcriptional regulator ATRX	ATRX	1.04746	0.402107	KQKLSVPVRKKDKRNSSDSAIDNPKPNKLPK	1;2	0.00230651	-0.342799	0.246591	-0.212517	0.345106	0.459108	S	2	0.999218	0.000470846	202.79	31.0618	0.306233	0.124449
P46100;P46100-4;Q5H9A3;P46100-6	92;92;53;92	P46100;P46100-6	Transcriptional regulator ATRX	ATRX	0.604827	0.36711	SRSKRKPSIVTKYVESDDEKPLDDETVNEDA	1	0.175301	-0.342799	0.00360232	-0.212517	0.5181	0.21612	S	3	1	6.22e-09	158.12	69.8791	0.312543	0.0894517
P46100;P46100-4;P46100-3;P46100-5;P46100-2;P46100-6	677;639;560;522;473;609	P46100;P46100-6	Transcriptional regulator ATRX	ATRX	1.03568	0.365547	TPLRRPTETNPVTSNSDEECNETVKEKQKLS	1	0.0760118	-0.342799	0.0997664	-0.212517	0.418811	0.312284	S	3	0.999998	2.81e-29	337.98	59.7891	1.06796	0.0878891
P46100;P46100-4;P46100-6	34;34;34	P46100;P46100-6	Transcriptional regulator ATRX	ATRX	1.19822	0.351852	HDFLAHSSEESEETSSPPRLAMNQNTDKISG	1	0.0441843	-0.342799	0.104203	-0.212517	0.386983	0.31672	S	3	0.974843	1.1e-35	351.09	15.886	0.611387	0.0741934
P46100;P46100-4;P46100-3;P46100-5;P46100-2;P46100-6	819;781;702;664;615;751	P46100;P46100-6	Transcriptional regulator ATRX	ATRX	0.236181	0.245611	SKKKRQTQSESSNYDSELEKEIKSMSKIGAA	1	-0.414364	-0.342799	0.350271	-0.212517	-0.0715654	0.562788	S	2	0.999997	5.66e-05	206.64	55.2319	0.0237594	-0.0320468
P46100;P46100-4;P46100-3;P46100-5;P46100-2;P46100-6	1061;1023;944;906;857;993	P46100;P46100-6	Transcriptional regulator ATRX	ATRX	0.65385	0.232588	SKKIRDKTSKKKDELSDYAEKSTGKGDSCDS	1	-0.025691	-0.342799	-0.0644498	-0.212517	0.317108	0.148068	S	2	1	0.00191167	170.42	121.398	0.587506	-0.0450704
P46100;P46100-4;P46100-3;P46100-5;P46100-2	598;560;481;443;394	P46100	Transcriptional regulator ATRX	ATRX	1.10456	0.142377	TKELYVKLTPVSLSNSPIKGADCQEVPQDKD	1;2	-0.182753	-0.342799	-0.0878101	-0.212517	0.160046	0.124707	S	2	0.997703	0.00134715	161.8	26.3871	0.667866	-0.135282
P46100;P46100-4;P46100-3;P46100-5;P46100-2	1527;1489;1410;1372;1323	P46100	Transcriptional regulator ATRX	ATRX	0.179032	0.141398	REREKLREVIEIEDASPTKCPITTKLVLDED	1	0.0395595	-0.342799	-0.312079	-0.212517	0.382358	-0.0995619	S	2	0.922928	0.000481122	199.37	10.7827	0.23637	-0.13626
P46100;P46100-4;P46100-3;P46100-5;P46100-2	1996;1958;1879;1841;1792	P46100	Transcriptional regulator ATRX	ATRX	1.04163	0.0937424	LKLEESKATSSSNPSSPAPDWYKDFVTDADA	1;2	-0.235586	-0.342799	-0.132246	-0.212517	0.107213	0.0802716	S	2	0.985251	0.000197455	144.27	18.2803	0.758554	-0.183916
P46100;P46100-4;P46100-3;P46100-5;P46100-2	1529;1491;1412;1374;1325	P46100	Transcriptional regulator ATRX	ATRX	0.0124025	-0.0167284	REKLREVIEIEDASPTKCPITTKLVLDEDEE	1	0.0184917	-0.342799	-0.607265	-0.212517	0.361291	-0.394747	T	2	0.5	0.00485505	130.01	0	0.284515	-0.294387
P46100;P46100-4;P46100-3;P46100-5;P46100-2;P46100-6	889;851;772;734;685;821	P46100;P46100-6	Transcriptional regulator ATRX	ATRX	0.0901448	-0.069613	GSSDDAERKQERETFSSAEGTVDKDTTIMEL	1;2	-0.182852	-0.342799	-0.511691	-0.212517	0.159947	-0.299173	S	2	0.998064	0.0015611	159.41	28.757	0.550509	-0.347271
P54253	238	P54253	Ataxin-1	ATXN1	0	NaN	QQQHLSRAPGLITPGSPPPAQQNQYVHISSS	1	-0.291857	NaN	-0.39703	NaN	NaN	NaN	S	3	0.99983	3.07e-05	110.67	37.7092	1.0157	-0.344444
P54253	775	P54253	Ataxin-1	ATXN1	0	NaN	KIEPSKPAATRKRRWSAPESRKLEKSEDEPP	1	-0.369501	NaN	-0.115785	NaN	NaN	NaN	S	2	0.999947	0.00817045	86.014	42.7175	0.513312	-0.242643
Q9UBB4;Q9UBB4-2;B1AHE3	430;366;81	Q9UBB4	Ataxin-10	ATXN10	0.488042	-2.13357	TQWVIYAIRNLTEDNSQNQDLIAKMEEQGLA	1	-0.921117	0.0173518	-3.31761	0.0110662	-0.938469	-3.32867	S	2	1	7e-09	224.41	87.6784	0.484672	-2.11936
P0C7T5	206	P0C7T5	Ataxin-1-like	ATXN1L	0	NaN	APSPAHSFNKAPSATSPSGQLPHHSSTQPLD	1	1.43494	NaN	NaN	NaN	NaN	NaN	S	3	0.963137	1.84e-05	117.79	16.1972	0	1.43494
P0C7T5	284	P0C7T5	Ataxin-1-like	ATXN1L	0	NaN	NGGQRPRERNLVRRESEALDSPNSKGEGQGL	2	NaN	NaN	NaN	NaN	NaN	NaN	S	2	0.999988	0.00913233	52.814	49.236	0	NaN
P0C7T5	289	P0C7T5	Ataxin-1-like	ATXN1L	0	NaN	PRERNLVRRESEALDSPNSKGEGQGLVPVVE	2	NaN	NaN	NaN	NaN	NaN	NaN	S	2	0.99811	0.00913233	52.814	27.2273	0	NaN
P0C7T5	615	P0C7T5	Ataxin-1-like	ATXN1L	0	NaN	QLGPPRERPERTVLGSRELCDSEGKSQPAGE	1	NaN	NaN	NaN	NaN	NaN	NaN	S	2	0.99842	0.00468694	100.39	29.5866	0	NaN
P0C7T5	456	P0C7T5	Ataxin-1-like	ATXN1L	0	NaN	SLDVQARATFPDKEPTPPPITSSHLPSHFMK	1	-0.420743	NaN	NaN	NaN	NaN	NaN	T	4	0.999166	4.07e-05	106.6	32.275	0	-0.420743
P0C7T5	330	P0C7T5	Ataxin-1-like	ATXN1L	0	NaN	SQTPRVEVAAPAHRGTPDTDLEVQRVVGALA	1	NaN	NaN	-0.273971	NaN	NaN	NaN	T	3	0.930517	0.000434072	69.071	11.2685	0	-0.273971
F8W0B5;H0YH87;V9GY86;Q99700-2;Q99700-4;Q99700;F8WB06;F8VQP2;Q24JQ7	241;784;703;863;863;863;598;598;574	F8W0B5;H0YH87	Ataxin-2	ATXN2	0	NaN	SSSNCTSGSSKPNSPSISPSILSNTEHKRGP	2	NaN	-0.0178113	NaN	0.0267293	NaN	NaN	S	3	0.939253	0.000247346	88.504	12.2674	0	NaN
F8W0B5;H0YH87;V9GY86;Q99700-2;Q99700-4;Q99700;F8WB06;F8VQP2;Q24JQ7	243;786;705;865;865;865;600;600;576	F8W0B5;H0YH87	Ataxin-2	ATXN2	0	NaN	SNCTSGSSKPNSPSISPSILSNTEHKRGPEV	2;3	NaN	-0.0178113	NaN	0.0267293	NaN	NaN	S	4	0.807148	6.74e-05	94.707	8.58857	0	NaN
F8W0B5;H0YH87;V9GY86;Q99700-2;Q99700-4;Q99700;F8WB06;F8VQP2;Q24JQ7	152;695;614;774;774;774;509;509;485	F8W0B5;H0YH87	Ataxin-2	ATXN2	0	NaN	PAGNKENIKPNETSPSFSKAENKGISPVVSE		NaN	-0.0178113	NaN	0.0267293	NaN	NaN	S	2	0.498909	3.61e-07	277.79	0	0	NaN
F8W0B5;H0YH87;V9GY86;Q99700-2;Q99700-4;Q99700;F8WB06;F8VQP2;Q24JQ7	48;525;444;604;604;604;339;339;315	F8W0B5;H0YH87	Ataxin-2	ATXN2	0	NaN	PSRPSRPPSHPSAHGSPAPVSTMPKRMSSEG	2	NaN	-0.0178113	NaN	0.0267293	NaN	NaN	S	3	0.840788	0.000550951	75.897	7.46325	0	NaN
F8W0B5	111	F8W0B5		ATXN2	0	NaN	HNPPSEAATPPVARTSPSGGTWSSVVSGAKD		NaN	NaN	NaN	NaN	NaN	NaN	S	2	0.49416	0.0229502	43.794	0	0	NaN
H0YH87;V9GY86;Q99700-2;Q99700-4;Q99700;F8WB06;F8VQP2;Q24JQ7	481;400;560;560;560;295;295;271	H0YH87	Ataxin-2	ATXN2	0	NaN	VVNGGVPWPSPCPSPSSRPPSRYQSGPNSLP		NaN	-0.0178113	NaN	0.0267293	NaN	NaN	S	3	0.368271	0.000771706	84.529	0	0	NaN
H0YH87;V9GY86;Q99700-2;Q99700-4;Q99700;F8WB06;F8VQP2;Q24JQ7	482;401;561;561;561;296;296;272	H0YH87	Ataxin-2	ATXN2	0	NaN	VNGGVPWPSPCPSPSSRPPSRYQSGPNSLPP		NaN	-0.0178113	NaN	0.0267293	NaN	NaN	S	3	0.368271	0.000771706	84.529	0	0	NaN
F8W0B5	110	F8W0B5		ATXN2	0	NaN	SHNPPSEAATPPVARTSPSGGTWSSVVSGAK		NaN	NaN	NaN	NaN	NaN	NaN	T	2	0.49416	0.0229502	43.794	0	0	NaN
H0YH87;V9GY86;Q99700-2;Q99700-4;Q99700;F8WB06;F8VQP2;Q24JQ7	587;506;666;666;666;401;401;377	H0YH87	Ataxin-2	ATXN2	0	NaN	SHNPPSEAATPPVARTSPSGGTWSSVVSGVP		NaN	-0.0178113	NaN	0.0267293	NaN	NaN	T	2	0.498031	0.000828218	85.563	0	0	NaN
H0YH87;V9GY86;Q99700-2;Q99700-4;Q99700;F8WB06;F8VQP2;Q24JQ7;F8VVY6	352;271;431;431;431;166;166;142;174	H0YH87	Ataxin-2	ATXN2	0	0.492689	DSSLSSYTVPLERDNSEEFLKREARANQLAE	1	0.474877	-0.0178113	NaN	0.0267293	0.492688	NaN	S	2	1	0.00555915	111.33	111.334	0	0.474877
F8W0B5;H0YH87;V9GY86;Q99700-2;Q99700-4;Q99700;F8WB06;F8VQP2;Q24JQ7	30;507;426;586;586;586;321;321;297	F8W0B5;H0YH87	Ataxin-2	ATXN2	0	0.469458	PNSLPPRAATPTRPPSRPPSRPSRPPSHPSA	1	0.451646	-0.0178113	NaN	0.0267293	0.469458	NaN	S	3	0.742912	0.00423141	55.546	5.46846	0	0.451646
F8W0B5;H0YH87;V9GY86;Q99700-2;Q99700-4;Q99700;F8WB06;F8VQP2;Q24JQ7	235;778;697;857;857;857;592;592;568	F8W0B5;H0YH87	Ataxin-2	ATXN2	1.01	0.44417	DSFIENSSSNCTSGSSKPNSPSISPSILSNT	1;2	0.495081	-0.0178113	0.402176	0.0267293	0.512892	0.375447	S	3	0.776037	3.91e-13	206.43	6.39589	1.18254	0.448629
F8W0B5;H0YH87;V9GY86;Q99700-2;Q99700-4;Q99700;F8WB06;F8VQP2;Q24JQ7	149;692;611;771;771;771;506;506;482	F8W0B5;H0YH87	Ataxin-2	ATXN2	0	0.375665	QNSPAGNKENIKPNETSPSFSKAENKGISPV	1	NaN	-0.0178113	0.402395	0.0267293	NaN	0.375665	T	2	0.587016	0.0545889	104.2	2.11049	0	0.402395
F8W0B5;H0YH87;V9GY86;Q99700-2;Q99700-4;Q99700;F8WB06;F8VQP2;Q24JQ7	150;693;612;772;772;772;507;507;483	F8W0B5;H0YH87	Ataxin-2	ATXN2	1.83159	0.286148	NSPAGNKENIKPNETSPSFSKAENKGISPVV	1	0.261711	-0.0178113	0.319502	0.0267293	0.279523	0.292773	S	2	0.998176	1.55e-10	277.79	27.4823	1.20002	0.290607
H0YH87;V9GY86;Q99700-2;Q99700-4;Q99700;F8WB06;F8VQP2;Q24JQ7	588;507;667;667;667;402;402;378	H0YH87	Ataxin-2	ATXN2	0	0.240616	HNPPSEAATPPVARTSPSGGTWSSVVSGVPR	1	0.222805	-0.0178113	NaN	0.0267293	0.240616	NaN	S	2	0.643734	0.000612095	117.03	5.57966	0	0.222805
F8W0B5;H0YH87;V9GY86;Q99700-2;Q99700-4;Q99700;F8WB06;F8VQP2;Q24JQ7	162;705;624;784;784;784;519;519;495	F8W0B5;H0YH87	Ataxin-2	ATXN2	0.583712	0.232609	NETSPSFSKAENKGISPVVSEHRKQIDDLKK	1	0.315798	-0.0178113	0.158337	0.0267293	0.333609	0.131608	S	2	1	0.00171518	191.23	83.5731	0.6901	0.237068
H0YH87;V9GY86;Q99700-2;Q99700-4;Q99700;F8WB06;F8VQP2;Q24JQ7	662;581;741;741;741;476;476;452	H0YH87	Ataxin-2	ATXN2	0.844884	0.211976	AASPTPASPASNRAVTPSSEAKDSRLQDQRQ	1	0.242572	-0.0178113	0.190299	0.0267293	0.260383	0.16357	T	2	0.999686	0.00348307	112.94	38.0378	1.1163	0.216435
H0YH87;V9GY86;Q99700-2;Q99700-4;Q99700;F8WB06;F8VQP2;Q24JQ7	387;306;466;466;466;201;201;177	H0YH87	Ataxin-2	ATXN2	0.773144	0.204736	SAQYKARVALENDDRSEEEKYTAVQRNSSER	1	0.24245	-0.0178113	0.17594	0.0267293	0.260261	0.14921	S	2	1	0.000571463	231.86	164.022	0.99843	0.209195
F8W0B5;H0YH87;V9GY86;Q99700-2;Q99700-4;Q99700;F8WB06;F8VQP2;Q24JQ7;F8WB05	267;810;729;889;889;889;624;624;600;28	F8W0B5;H0YH87	Ataxin-2	ATXN2	1.37945	0.188269	HKRGPEVTSQGVQTSSPACKQEKDDKEEKKD	1	0.182819	-0.0178113	0.202637	0.0267293	0.200631	0.175908	S	2	0.999857	4.43e-09	239.27	38.6974	1.48542	0.192728
F8W0B5;H0YH87;V9GY86;Q99700-2;Q99700-4;Q99700;F8WB06;F8VQP2;Q24JQ7	239;782;701;861;861;861;596;596;572	F8W0B5;H0YH87	Ataxin-2	ATXN2	0.54672	0.153985	ENSSSNCTSGSSKPNSPSISPSILSNTEHKR	1;2;3	0.0625362	-0.0178113	0.254352	0.0267293	0.0803475	0.227623	S	3	0.999639	3.91e-13	246.67	34.4191	0.460269	0.158444
F8W0B5;H0YH87;V9GY86;Q99700-2;Q99700-4;Q99700;F8WB06;F8VQP2;Q24JQ7	41;518;437;597;597;597;332;332;308	F8W0B5;H0YH87	Ataxin-2	ATXN2	0.910994	-0.221658	TRPPSRPPSRPSRPPSHPSAHGSPAPVSTMP	1;2	-0.196194	-0.0178113	-0.238204	0.0267293	-0.178383	-0.264933	S	4	0.781703	4.7e-05	90.299	5.73845	1.21201	-0.217199
F8W0B5;H0YH87;V9GY86;Q99700-2;Q99700-4;Q99700;F8WB06;F8VQP2;Q24JQ7	68;545;464;624;624;624;359;359;335	F8W0B5;H0YH87	Ataxin-2	ATXN2	1.50583	-0.629213	STMPKRMSSEGPPRMSPKAQRHPRNHRVSAG	1	-0.677887	-0.0178113	-0.571622	0.0267293	-0.660076	-0.598351	S	2	1	0.00165428	212.41	79.1472	1.26751	-0.624754
Q8WWM7;Q8WWM7-6;Q8WWM7-8;Q8WWM7-5;Q8WWM7-4;Q8WWM7-9;Q8WWM7-2;Q8WWM7-3;H3BUF6	632;632;632;632;632;632;632;632;638	Q8WWM7	Ataxin-2-like protein	ATXN2L	0	NaN	GTEGPEQPPPPCPSQTGSPPVGLIKGEDKDE		NaN	0.104873	NaN	0.0596321	NaN	NaN	T	3	0.495521	2.45e-10	105.66	1.25795	0	NaN
Q8WWM7;Q8WWM7-6;Q8WWM7-8;Q8WWM7-5;Q8WWM7-4;Q8WWM7-9;Q8WWM7-2;Q8WWM7-3;H3BUF6;H3BRB0	683;683;683;683;683;683;683;683;689;9	Q8WWM7	Ataxin-2-like protein	ATXN2L	0	NaN	PTKPLLSVNKSTSTPTSPGPRTHSTPSIPVL		NaN	0.104873	NaN	0.0596321	NaN	NaN	T	2	0.408383	0.00417846	99.991	1.65368	0	NaN
Q8WWM7;Q8WWM7-6;Q8WWM7-8;Q8WWM7-5;Q8WWM7-4;Q8WWM7-9;Q8WWM7-2;Q8WWM7-3;H3BUF6;Q8WWM7-7;H3BSK9	111;111;111;111;111;111;111;111;111;111;51	Q8WWM7	Ataxin-2-like protein	ATXN2L	1.43703	1.40301	IGSARGQSTGKGPPQSPVFEGVYNNSRMLHF	1	1.42723	0.104873	1.5433	0.0596321	1.32236	1.48367	S	2	1	1.23e-08	265.9	129.152	1.60447	1.48526
Q8WWM7;Q8WWM7-6;Q8WWM7-8;Q8WWM7-5;Q8WWM7-4;Q8WWM7-9;Q8WWM7-2;Q8WWM7-3;H3BUF6;H3BRB0	680;680;680;680;680;680;680;680;686;6	Q8WWM7	Ataxin-2-like protein	ATXN2L	0	0.644709	EFNPTKPLLSVNKSTSTPTSPGPRTHSTPSI	1;2	NaN	0.104873	0.704341	0.0596321	NaN	0.644709	S	2	0.996516	0.00221916	115.68	24.9747	0	0.704341
Q8WWM7;Q8WWM7-6;Q8WWM7-8;Q8WWM7-5;Q8WWM7-4;Q8WWM7-9;Q8WWM7-2;Q8WWM7-3;H3BUF6;H3BRB0	684;684;684;684;684;684;684;684;690;10	Q8WWM7	Ataxin-2-like protein	ATXN2L	1.46424	0.642173	TKPLLSVNKSTSTPTSPGPRTHSTPSIPVLT	1;2	0.712376	0.104873	0.736475	0.0596321	0.607502	0.676843	S	2	0.955979	0.00221916	115.68	13.2578	1.97518	0.724425
Q8WWM7;Q8WWM7-6;Q8WWM7-8;Q8WWM7-5;Q8WWM7-4;Q8WWM7-9;Q8WWM7-2;Q8WWM7-3;H3BUF6	449;449;449;449;449;449;449;449;455	Q8WWM7	Ataxin-2-like protein	ATXN2L	1.84075	0.636206	SVPPPPAVGRMYPPRSPKSAAPAPISASCPE	1	0.726657	0.104873	0.710261	0.0596321	0.621784	0.650629	S	2	1	0.00571249	101.35	68.2152	2.13883	0.718459
Q8WWM7;Q8WWM7-6;Q8WWM7-8;Q8WWM7-5;Q8WWM7-4;Q8WWM7-9;Q8WWM7-2;Q8WWM7-3;H3BUF6;H3BRB0	681;681;681;681;681;681;681;681;687;7	Q8WWM7	Ataxin-2-like protein	ATXN2L	0	0.59991	FNPTKPLLSVNKSTSTPTSPGPRTHSTPSIP	1;2	0.704783	0.104873	NaN	0.0596321	0.59991	NaN	T	2	0.606612	0.00300297	128.21	2.10775	0	0.704783
Q8WWM7;Q8WWM7-6;Q8WWM7-8;Q8WWM7-5;Q8WWM7-4;Q8WWM7-9;Q8WWM7-2;Q8WWM7-3;H3BUF6	391;391;391;391;391;391;391;391;391	Q8WWM7	Ataxin-2-like protein	ATXN2L	0	0.528117	LSSLPPRGPHHLDNSSPGPGSEARGINGGPS	1	NaN	0.104873	0.587749	0.0596321	NaN	0.528117	S	2	0.499933	0.000604192	127.32	0	0	0.587749
Q8WWM7;Q8WWM7-6;Q8WWM7-8;Q8WWM7-5;Q8WWM7-4;Q8WWM7-9;Q8WWM7-2;Q8WWM7-3;H3BUF6	594;594;594;594;594;594;594;594;600	Q8WWM7	Ataxin-2-like protein	ATXN2L	2.41391	0.397795	KEKEVDGLLTSEPMGSPVSSKTESVSDKEDK	1	0.505078	0.104873	0.455018	0.0596321	0.400204	0.395386	S	2	0.997831	2.23e-12	273.45	27.1026	1.47934	0.480048
Q8WWM7;Q8WWM7-6;Q8WWM7-8;Q8WWM7-5;Q8WWM7-4;Q8WWM7-9;Q8WWM7-2;Q8WWM7-3;H3BUF6	390;390;390;390;390;390;390;390;390	Q8WWM7	Ataxin-2-like protein	ATXN2L	0.395047	0.304745	GLSSLPPRGPHHLDNSSPGPGSEARGINGGP	1	0.186247	0.104873	0.587749	0.0596321	0.0813736	0.528117	S	2	0.634758	8.35e-05	169.85	2.40043	0.516214	0.386998
Q8WWM7;Q8WWM7-6;Q8WWM7-8;Q8WWM7-5;Q8WWM7-4;Q8WWM7-9;Q8WWM7-2;Q8WWM7-3;H3BUF6;Q8WWM7-7;H3BSK9	306;306;306;306;306;306;306;306;306;306;246	Q8WWM7	Ataxin-2-like protein	ATXN2L	0.68707	0.240761	QRELRAAQLAREIESSPQYRLRIAMENDDGR	1	0.265077	0.104873	0.380951	0.0596321	0.160203	0.321319	S	2	0.996091	0.00366601	118.9	24.0625	0.946978	0.323014
Q8WWM7;Q8WWM7-6;Q8WWM7-8;Q8WWM7-5;Q8WWM7-4;Q8WWM7-9;Q8WWM7-2;Q8WWM7-3	424;424;424;424;424;424;424;424	Q8WWM7	Ataxin-2-like protein	ATXN2L	0.876114	-0.237878	SPKAQRPLRGAKTLSSPSNRPSGETSVPPPP	1	-0.183441	0.104873	-0.127809	0.0596321	-0.288315	-0.187442	S	3	0.977398	2.39e-05	141.78	19.9281	0.948469	-0.155625
Q8WWM7;Q8WWM7-6;Q8WWM7-8;Q8WWM7-5;Q8WWM7-4;Q8WWM7-9;Q8WWM7-2;Q8WWM7-3;H3BUF6;Q8WWM7-7;H3BSK9	339;339;339;339;339;339;339;339;339;339;279	Q8WWM7	Ataxin-2-like protein	ATXN2L	2.57751	-0.40154	EEKHSAVQRQGSGRESPSLASREGKYIPLPQ	1	-0.298336	0.104873	-0.34024	0.0596321	-0.403209	-0.399872	S	2	0.999898	0.000206843	226.08	39.9339	1.3797	-0.319288
Q8WWM7;Q8WWM7-6;Q8WWM7-8;Q8WWM7-5;Q8WWM7-4;Q8WWM7-9;Q8WWM7-2;Q8WWM7-3;H3BUF6	559;559;559;559;559;559;559;559;565	Q8WWM7	Ataxin-2-like protein	ATXN2L	1.41438	-0.448513	ELRKFGAQFKLQPSSSPENSLDPFPPRILKE	1	-0.370807	0.104873	-0.361713	0.0596321	-0.47568	-0.421345	S	2	0.992599	0.000162637	153.36	21.3413	2.10222	-0.36626
Q8WWM7;Q8WWM7-6;Q8WWM7-8;Q8WWM7-5;Q8WWM7-4;Q8WWM7-9;Q8WWM7-2;Q8WWM7-3;H3BUF6;Q8WWM7-7	31;31;31;31;31;31;31;31;31;31	Q8WWM7	Ataxin-2-like protein	ATXN2L	0	-1.0631	PPPTQQAVARRPPGGTSPPNGGLPGPLATSA	1	-0.958224	0.104873	NaN	0.0596321	-1.0631	NaN	T	4	0.573646	3.09e-22	138.59	1.28888	0	-0.958224
Q8WWM7;Q8WWM7-6;Q8WWM7-8;Q8WWM7-5;Q8WWM7-4;Q8WWM7-9;Q8WWM7-2;Q8WWM7-3;H3BUF6	634;634;634;634;634;634;634;634;640	Q8WWM7	Ataxin-2-like protein	ATXN2L	1.45984	-1.14587	EGPEQPPPPCPSQTGSPPVGLIKGEDKDEGP	1	-1.10349	0.104873	-1.02374	0.0596321	-1.20836	-1.08337	S	4	0.977261	3.14e-12	167.34	16.3337	1.62241	-1.06361
Q8WWM7;Q8WWM7-6;Q8WWM7-8;Q8WWM7-5;Q8WWM7-4;Q8WWM7-9;Q8WWM7-2;Q8WWM7-3;H3BUF6	409;409;409;409;409;409;409;409;409	Q8WWM7	Ataxin-2-like protein	ATXN2L	0	-1.25659	PGSEARGINGGPSRMSPKAQRPLRGAKTLSS	1	-1.15172	0.104873	NaN	0.0596321	-1.25659	NaN	S	2	0.99382	0.0151969	89.642	22.0631	0	-1.15171
Q8WWM7;Q8WWM7-6;Q8WWM7-8;Q8WWM7-5;Q8WWM7-4;Q8WWM7-9;Q8WWM7-2;Q8WWM7-3;H3BUF6;Q8WWM7-7	32;32;32;32;32;32;32;32;32;32	Q8WWM7	Ataxin-2-like protein	ATXN2L	0	-1.41599	PPTQQAVARRPPGGTSPPNGGLPGPLATSAA	1	-1.31111	0.104873	NaN	0.0596321	-1.41599	NaN	S	5	0.499948	0.0372122	74.358	0	0	-1.31111
Q5T6C5	179	Q5T6C5	Ataxin-7-like protein 2	ATXN7L2	0	NaN	TQKDNLCQPGGLTKDSPGKPPMAPPSKEPPG	1	-0.435339	NaN	NaN	NaN	NaN	NaN	S	2	1	0.0237416	77.08	67.6057	0	-0.435339
Q5T6C5;Q5T6C4	475;102	Q5T6C5	Ataxin-7-like protein 2	ATXN7L2	0	NaN	EPPAHLVNSPLSAPLSPSSTGTCPRLPGPTL	1	NaN	NaN	-0.746059	NaN	NaN	NaN	S	3	0.853533	2.88e-05	112.01	9.76618	0	-0.746059
Q5T6C5;Q5T6C4	575;202	Q5T6C5	Ataxin-7-like protein 2	ATXN7L2	0	NaN	KDGVEVEAPSRKRKLSPGPTTLKRTCILEPT	1	0.210763	NaN	NaN	NaN	NaN	NaN	S	2	0.99908	0.0047592	93.716	31.6354	0	0.210763
K7EJK2;K7ENU1;K7EKG9;Q14CW9;Q14CW9-2	63;120;281;281;288	K7EJK2	Ataxin-7-like protein 3	ATXN7L3	0	NaN	QALISRLQWDGSSDLSPSDSGSSKT______	1	0.460061	NaN	NaN	NaN	NaN	NaN	S	2	0.737542	4.47e-05	137.86	5.67409	0	0.460061
Q9Y679-2;Q9Y679;Q9Y679-3	288;354;288	Q9Y679-2	Ancient ubiquitous protein 1	AUP1	1.02613	1.48299	HPRLRPQSAQSSFPPSPGPSPDVQLATLAQR	1	1.02361	-0.238425	1.36138	-0.342579	1.26204	1.70395	S	3	0.9998	6.55e-06	131.27	37.5145	1.04787	1.19249
Q9Y679-2;Q9Y679	367;433	Q9Y679-2	Ancient ubiquitous protein 1	AUP1	0.97109	0.581358	LPTASASKFPSSGPVTPQPTALTFAKSSWAR	1	0.2444	-0.238425	0.337311	-0.342579	0.482825	0.679891	T	2	0.999021	0.000377712	117.35	30.1372	0.996411	0.290856
Q96GD4;J9JID1;Q96GD4-4;J3KTD6;J3QLN8;J3QR41;Q96GD4-2;Q96GD4-3;J3KRJ2;J3KRF8	64;64;23;64;23;23;64;64;23;64	Q96GD4	Aurora kinase B	AURKB	0	2.93294	PTAAPGQKVMENSSGTPDILTRHFTIDDFEI	1	NaN	0.256165	3.14843	0.215492	NaN	2.93294	T	2	0.852472	0.0337264	66.893	10.7718	0	3.14843
Q8WXX7-2;Q8WXX7	1174;1198	Q8WXX7-2	Autism susceptibility gene 2 protein	AUTS2	0	NaN	SLITPGLPSMHYPRISPTAGNQNGLLNKTPP	1	0.357496	NaN	NaN	NaN	NaN	NaN	S	2	0.997067	0.00279289	80.411	25.3139	0	0.357496
Q8WXX7-2;Q8WXX7	1209;1233	Q8WXX7-2	Autism susceptibility gene 2 protein	AUTS2	0	NaN	SAPPPLISTLGGRPVSPRRTTPLSAEIRERP	1	-0.762436	NaN	-0.623799	NaN	NaN	NaN	S	3	0.997461	1.04e-12	193.05	28.952	1.19752	-0.693117
Q8WXX7-2;Q8WXX7	917;941	Q8WXX7-2	Autism susceptibility gene 2 protein	AUTS2	0	NaN	GRAAGEEAKQLARVPSPYVRTPVVESARPNS	1	-0.172083	NaN	-0.393217	NaN	NaN	NaN	S	2	0.999026	0.042169	73.233	30.1097	0.624552	-0.28265
Q9NQS1	261	Q9NQS1	Cell death regulator Aven	AVEN	0	NaN	SVAAGCPVLLGKDNPSPGPSRDSQKPTSPLQ	1	0.691266	NaN	0.0846086	NaN	NaN	NaN	S	2	0.980025	0.0266115	56.087	16.9075	0.374209	0.387937
Q9NQS1	273	Q9NQS1	Cell death regulator Aven	AVEN	0	NaN	DNPSPGPSRDSQKPTSPLQSAGDHLEEELDL	1	0.111432	NaN	0.144829	NaN	NaN	NaN	S	3	0.993292	3.01e-88	412.47	21.7065	1.08353	0.128131
Q8NBF6;H7C0I1;B8ZZW5;Q8NBF6-2;Q8N6Z3	246;177;246;246;246	Q8NBF6	Late secretory pathway protein AVL9 homolog	AVL9	0	NaN	HGLSDCSQYRPRKSMSEDGGLQESNPCADDF		NaN	-0.143468	NaN	-0.159734	NaN	NaN	S	4	0.498853	0.000488767	44.389	0.355008	0	NaN
Q8NBF6;H7C0I1;B8ZZW5;Q8NBF6-2;Q8N6Z3	244;175;244;244;244	Q8NBF6	Late secretory pathway protein AVL9 homolog	AVL9	0	2.66991	IEHGLSDCSQYRPRKSMSEDGGLQESNPCAD	1	2.52644	-0.143468	NaN	-0.159734	2.66991	NaN	S	3	0.837266	7.47e-34	239.26	7.11384	0	2.52644
O15169-2;O15169	77;77	O15169-2	Axin-1	AXIN1	0	NaN	RRSDLDLGYEPEGSASPTPPYLKWAESLHSL	1	-0.272472	NaN	NaN	NaN	NaN	NaN	S	3	0.935501	0.000301895	84.509	12.6245	0	-0.272472
O15169-2;O15169	493;493	O15169-2	Axin-1	AXIN1	0	NaN	VLRTPGRQSPGPGHRSPDSGHVAKMPVALGG	1	NaN	NaN	NaN	NaN	NaN	NaN	S	2	0.999344	0.0302134	66.617	31.8263	0	NaN
M0QX07;J3KQS6;Q9NWV8;M0QY17;M0R3F4;M0R2A4;M0R2K3;M0R193;M0R0I0;Q9NWV8-3;M0R3H9;M0R2I2	8;8;8;8;8;8;8;8;8;8;8;37	M0QX07	BRISC and BRCA1-A complex member 1	BABAM1	0.430848	-0.237429	________MEVAEPSSPTEEEEEEEEHSAEP	1	-0.0376805	0.356144	0.0472592	0.128294	-0.393824	-0.0810343	S	3	0.966377	2.74e-27	270.45	15.1824	0.0322134	0.00478935
M0QX07;J3KQS6;Q9NWV8;M0QY17;M0R3F4;M0R2A4;M0R2K3;M0R193;M0R0I0;Q9NWV8-3;M0R2I2	49;49;49;49;49;49;49;49;49;49;78	M0QX07	BRISC and BRCA1-A complex member 1	BABAM1	0.557849	-0.336153	AEDRAVGAQASVGSRSEGEGEAASADDGSLN	1	-0.136125	0.356144	-0.051743	0.128294	-0.492269	-0.180036	S	2	1	1.36e-24	288.58	115.104	0.570651	-0.093934
M0QX07;J3KQS6;Q9NWV8;M0QY17;M0R3F4;M0R2A4;M0R2K3;M0R193;M0R0I0;Q9NWV8-3;M0R3H9;M0R2I2	29;29;29;29;29;29;29;29;29;29;29;58	M0QX07	BRISC and BRCA1-A complex member 1	BABAM1	0.334281	-0.552381	EEEEEHSAEPRPRTRSNPEGAEDRAVGAQAS	1	-0.688102	0.356144	0.0677764	0.128294	-1.04425	-0.0605171	S	2	0.998592	0.00793742	244.57	28.5072	0.249874	-0.310163
M0QX07;J3KQS6;Q9NWV8;M0QY17;M0R3F4;M0R2A4;M0R2K3;M0R193;M0R0I0;Q9NWV8-3;M0R2I2	66;66;66;66;66;66;66;66;66;66;95	M0QX07	BRISC and BRCA1-A complex member 1	BABAM1	0	-0.96909	GEGEAASADDGSLNTSGAGPKSWQVPPPAPE	1	-0.612946	0.356144	NaN	0.128294	-0.96909	NaN	S	2	0.704948	2.77e-20	259.8	3.78286	0	-0.612946
O14867;H7C4B6	445;11	O14867	Transcription regulator protein BACH1	BACH1	0	NaN	QKRSECPWLGIRISESPEPGQRTFTTLSSVN	1	0.249142	NaN	0.390998	NaN	NaN	NaN	S	2	0.999993	0.00414661	115.34	51.6797	0.85751	0.32007
Q9BYV9	315	Q9BYV9	Transcription regulator protein BACH2	BACH2	0	NaN	AKDRAGDVEMDRKQPSPAPTPTAPAGAACLE	1	-0.367248	NaN	0.0326651	NaN	NaN	NaN	S	2	0.999995	3.03e-05	135.8	53.1656	0.254554	-0.167291
Q92934;F5GYS3;A8MXU7	25;25;25	Q92934	Bcl2-associated agonist of cell death	BAD	0	NaN	SEQEDSSSAERGLGPSPAGDGPSGSGKHHRQ	1	0.090718	NaN	NaN	NaN	NaN	NaN	S	2	0.999982	0.0026245	74.505	48.1616	0	0.090718
Q92934	75	Q92934	Bcl2-associated agonist of cell death	BAD	0	NaN	HHGGAGAVEIRSRHSSYPAGTEDDEGMGEEP	1	0.19774	NaN	0.206518	NaN	NaN	NaN	S	2	0.99879	4.5e-114	482.96	29.1669	1.85942	0.202129
Q92934;F5H1R6;F5H3B1	118;33;33	Q92934	Bcl2-associated agonist of cell death	BAD	0	NaN	NLWAAQRYGRELRRMSDEFVDSFKKGLPRPK	1	-0.176528	NaN	0.000144286	NaN	NaN	NaN	S	2	1	0.00133767	189.91	86.8711	0.300578	-0.0881918
Q92934;F5H1R6	134;49	Q92934	Bcl2-associated agonist of cell death	BAD	0	NaN	DEFVDSFKKGLPRPKSAGTATQMRQSSSWTR	1	-0.216501	NaN	-0.265449	NaN	NaN	NaN	S	2	0.999999	0.00118263	182.54	61.9949	1.19088	-0.240975
Q92934;F5H1R6;F5H3B1	99;14;14	Q92934	Bcl2-associated agonist of cell death	BAD	0	NaN	EGMGEEPSPFRGRSRSAPPNLWAAQRYGREL	1	-0.510868	NaN	-0.0664274	NaN	NaN	NaN	S	2	1	0.00329599	128.35	57.5318	0.379153	-0.288648
O95816	20	O95816	BAG family molecular chaperone regulator 2	BAG2	1.24324	0.664051	KINAKANEGRFCRSSSMADRSSRLLESLDQL	1	0.607484	0.00317045	0.697863	-0.0259259	0.604314	0.723789	S	2	0.999638	0.0322979	80.231	35.4935	1.35647	0.652673
O95817;C9JFK9	284;226	O95817	BAG family molecular chaperone regulator 3	BAG3	0	NaN	SVQGASSREGSPARSSTPLHSPSPIRVHTVV		NaN	0.459746	NaN	0.617675	NaN	NaN	S	2	0.445006	0.00811481	62.94	0.747518	0	NaN
O95817;C9JFK9	279;221	O95817	BAG family molecular chaperone regulator 3	BAG3	0	NaN	SPFRSSVQGASSREGSPARSSTPLHSPSPIR	2	NaN	0.459746	NaN	0.617675	NaN	NaN	S	2	0.999999	0.00448166	179.82	59.8784	0	NaN
O95817;C9JFK9	289;231	O95817	BAG family molecular chaperone regulator 3	BAG3	2.4256	0.761664	SSREGSPARSSTPLHSPSPIRVHTVVDRPQQ	1;2;3	1.21692	0.459746	1.38383	0.617675	0.757174	0.766154	S	2	1	0.000617606	239.98	70.0402	1.38934	1.30037
O95817;C9JFK9	274;216	O95817	BAG family molecular chaperone regulator 3	BAG3	0.447038	-0.118424	PLRAASPFRSSVQGASSREGSPARSSTPLHS	1;2	0.415759	0.459746	0.424815	0.617675	-0.0439877	-0.19286	S	2	0.770034	0.00322862	132.56	5.24847	2.16378	0.420287
O95817;C9JFK9	275;217	O95817	BAG family molecular chaperone regulator 3	BAG3	0.217592	-0.15911	LRAASPFRSSVQGASSREGSPARSSTPLHSP	1;2	0.523963	0.459746	0.235237	0.617675	0.0642169	-0.382438	S	2	0.971912	0.00399433	179.82	15.3913	0.63572	0.3796
O95817;C9JFK9	195;137	O95817	BAG family molecular chaperone regulator 3	BAG3	0.691246	-0.247523	SSSSSSASLPSSGRSSLGSHQLPRGYISIPV	1	0.294194	0.459746	0.288181	0.617675	-0.165552	-0.329493	S	2	0.963571	0.0044123	130.36	14.2258	2.18225	0.291188
O95817;C9JFK9	173;115	O95817	BAG family molecular chaperone regulator 3	BAG3	0.656289	-0.267272	AAAQPPASHGPERSQSPAASDCSSSSSSASL	1	0.289008	0.459746	0.253868	0.617675	-0.170738	-0.363806	S	2	0.999822	2.73e-24	278.03	37.5021	1.38563	0.271438
O95817;C9JFK9	285;227	O95817	BAG family molecular chaperone regulator 3	BAG3	1.19428	-0.529154	VQGASSREGSPARSSTPLHSPSPIRVHTVVD	1;2;3	-0.0160888	0.459746	0.0352017	0.617675	-0.475835	-0.582473	T	3	0.999629	0.000617606	198.1	34.5065	0.111866	0.00955641
O95817;C9JFK9	291;233	O95817	BAG family molecular chaperone regulator 3	BAG3	1.34448	-0.574341	REGSPARSSTPLHSPSPIRVHTVVDRPQQPM	1;2;3	-0.0737121	0.459746	0.00245056	0.617675	-0.533458	-0.615224	S	2	1	0.000954227	194	76.144	0.283032	-0.0356307
O95817	406	O95817	BAG family molecular chaperone regulator 3	BAG3	0.829614	-0.908152	ATEERAAPSTAPAEATPPKPGEAEAPPKHPG	1	-0.233329	0.459746	-0.505554	0.617675	-0.693075	-1.12323	T	3	1	3.38e-06	142.32	75.3462	0.648349	-0.369441
O95817	377	O95817	BAG family molecular chaperone regulator 3	BAG3	1.74265	-1.50354	VEVKVPPAPVPCPPPSPGPSAVPSSPKSVAT	1;2	-1.00107	0.459746	-0.928594	0.617675	-1.46081	-1.54627	S	3	0.999991	8.36e-12	196.45	51.4229	1.62162	-0.964831
O95817	385	O95817	BAG family molecular chaperone regulator 3	BAG3	0	-1.56656	PVPCPPPSPGPSAVPSSPKSVATEERAAPST	1;2	-1.10681	0.459746	NaN	0.617675	-1.56655	NaN	S	3	0.692448	8.36e-12	196.45	3.56039	0	-1.10681
O95817	386	O95817	BAG family molecular chaperone regulator 3	BAG3	1.96561	-1.57138	VPCPPPSPGPSAVPSSPKSVATEERAAPSTA	1;2	-1.08492	0.459746	-0.980426	0.617675	-1.54466	-1.5981	S	3	0.795411	1.67e-09	227.25	5.90601	1.49241	-1.03267
O95429;O95429-2	7;7	O95429	BAG family molecular chaperone regulator 4	BAG4	0	NaN	_________MSALRRSGYGPSDGPSYGRYYG	1	0.363227	NaN	0.48553	NaN	NaN	NaN	S	2	0.976947	0.00990216	60.529	16.2825	1.04045	0.424378
O95429;O95429-2;H0YBT1	179;143;26	O95429	BAG family molecular chaperone regulator 4	BAG4	0	NaN	SYSTEVPSTYRSSGNSPTPVSRWIYPQQDCQ	1	0.0360461	NaN	0.0949116	NaN	NaN	NaN	S	2	0.999998	0.00150603	214.32	57.8264	0.570357	0.0654789
B0UX83;P46379-2;P46379;P46379-3	1075;1075;1081;1111	B0UX83	Large proline-rich protein BAG6	BAG6	1.65955	0.803909	AVSRAAKAAGARPLTSPESLSRDLEAPEVQE	1	0.869398	0.0931545	0.903887	0.0723116	0.776243	0.831575	S	2	0.999175	0.00258621	154.39	30.8507	1.90727	0.886642
B0UX83;P46379-2;P46379;P46379-3;P46379-5;H0Y710	967;967;973;1003;967;116	B0UX83	Large proline-rich protein BAG6	BAG6	0.835415	0.0869017	QGAERASPEPQRENASPAPGTTAEEAMSRGP	1;2	0.159758	0.0931545	0.179511	0.0723116	0.0666038	0.1072	S	2	1	1.27e-05	196.78	97.7039	1.43153	0.169635
B0UX83;P46379-2;P46379;P46379-3;P46379-5;P46379-4;H0Y710;H0Y4L1	1111;1111;1117;1147;1062;888;211;121	B0UX83	Large proline-rich protein BAG6	BAG6	1.48818	-0.13434	LRSDIQKRLQEDPNYSPQRFPNAQRAFADDP	1	-0.0343228	0.0931545	-0.0688919	0.0723116	-0.127477	-0.141204	S	2	1	2.32e-05	203.93	78.3032	0.686673	-0.0516074
B0UX83;P46379-2;P46379;P46379-3;P46379-5;P46379-4;F6S6P2;F6RG75;F6VEM6;F6X9W3;F6U341;F6UR09;F6XTU0;F6WML8;F6U1F2;F6TC96	113;113;113;113;113;113;113;113;113;113;113;113;113;113;113;113	B0UX83	Large proline-rich protein BAG6	BAG6	0.900044	-0.301627	ASSGTGSASATHGGGSPPGTRGPGASVHDRN	1	-0.268904	0.0931545	-0.168885	0.0723116	-0.362058	-0.241196	S	3	0.999783	2.99e-60	346.66	37.6161	0.844693	-0.218894
B0UX83;P46379-2;P46379;P46379-3;P46379-5;P46379-4;F6S6P2;F6RG75;F6VEM6;F6X9W3;F6U341;F6UR09;F6XTU0;F6WML8;F6U1F2;F6TC96	117;117;117;117;117;117;117;117;117;117;117;117;117;117;117;117	B0UX83	Large proline-rich protein BAG6	BAG6	0	-0.392218	TGSASATHGGGSPPGTRGPGASVHDRNANSY	1	-0.299063	0.0931545	NaN	0.0723116	-0.392217	NaN	T	4	0.674272	4.39e-23	230.25	3.91186	0	-0.299063
B0UX83;P46379-2;P46379;P46379-3;P46379-5;H0Y710	958;958;964;994;958;107	B0UX83	Large proline-rich protein BAG6	BAG6	0.88634	-0.853788	PLPEEPMEVQGAERASPEPQRENASPAPGTT	1;2	-0.937326	0.0931545	-0.604784	0.0723116	-1.03048	-0.677095	S	4	1	1.26e-14	202.88	85.0441	0.868988	-0.771055
I3L2T4;F8WBW8;Q9P281	1991;2079;2079	I3L2T4	BAH and coiled-coil domain-containing protein 1	BAHCC1	0	NaN	KDKAGKAELLTSGAKSPTGASDHFLGRRGSP	1	NaN	NaN	0.0258793	NaN	NaN	NaN	S	2	0.976987	0.00194865	143.58	16.2792	0	0.0258793
I3L2T4;F8WBW8;Q9P281	1022;1110;1110	I3L2T4	BAH and coiled-coil domain-containing protein 1	BAHCC1	0	NaN	PEPTRTFLPGEPPPCSPRSLEEPGLLSGARE	1	NaN	NaN	NaN	NaN	NaN	NaN	S	2	0.999955	0.0220672	58.98	43.4354	0	NaN
I3L2T4;F8WBW8;Q9P281	1993;2081;2081	I3L2T4	BAH and coiled-coil domain-containing protein 1	BAHCC1	0	NaN	KAGKAELLTSGAKSPTGASDHFLGRRGSPLL	1	0.0982848	NaN	NaN	NaN	NaN	NaN	T	2	0.663061	0.000969118	195.24	2.94001	0	0.0982848
Q8TBE0-3;Q8TBE0-2;Q8TBE0	184;184;184	Q8TBE0-3	Bromo adjacent homology domain-containing 1 protein	BAHD1	0	NaN	KRPRLGDLGGGSRDLSPEPAPDEGPRRDGDP	1	0.168	NaN	0.388024	NaN	NaN	NaN	S	2	1	0.000678804	143.86	124.675	0.620007	0.278012
Q8TBE0-3;Q8TBE0-2;Q8TBE0	121;121;121	Q8TBE0-3	Bromo adjacent homology domain-containing 1 protein	BAHD1	0	NaN	SEDPGLAQPRKRRLASLNAEALNNLLLERED	1	2.2121	NaN	2.32294	NaN	NaN	NaN	S	2	1	0.000218225	128.67	72.8007	1.80811	2.26752
Q8TBE0-3;Q8TBE0-2;Q8TBE0	405;405;405	Q8TBE0-3	Bromo adjacent homology domain-containing 1 protein	BAHD1	0	NaN	CGGYSPCPMLPEGKLSPVAAPHEEGLLLAPS	1	0.10286	NaN	NaN	NaN	NaN	NaN	S	3	0.999998	5.89e-07	76.255	63.4863	0	0.10286
Q8TBE0-3;Q8TBE0-2;Q8TBE0	8;8;8	Q8TBE0-3	Bromo adjacent homology domain-containing 1 protein	BAHD1	0	NaN	________MTHTRRKSLPMLSSGLTGRREPL	1	1.3364	NaN	NaN	NaN	NaN	NaN	S	2	0.99989	0.00869813	65.511	40.0003	0	1.3364
I3L0Y9	16	I3L0Y9		BAIAP2	0	NaN	MQQVASNGATLPSALSASKSNLVISDPIPGA	1	0.548338	NaN	NaN	NaN	NaN	NaN	S	2	0.593074	0.000138815	121.5	1.74574	0	0.548338
I3L0Y9	18	I3L0Y9		BAIAP2	0	NaN	QVASNGATLPSALSASKSNLVISDPIPGAKP	1	NaN	NaN	1.12267	NaN	NaN	NaN	S	2	0.707775	0.00113049	81.553	3.86416	0	1.12267
Q9UQB8-3;Q9UQB8-5;Q9UQB8-4;Q9UQB8-6;Q9UQB8-2;Q9UQB8;I3L4C2;F8W878;B4DWA1;I3L3C6	452;452;452;453;452;452;485;374;315;134	Q9UQB8-3	Brain-specific angiogenesis inhibitor 1-associated protein 2	BAIAP2	0	NaN	SDGSDRLHMSLQQGKSSSTGNLLDKDDLAIP		NaN	0.92729	NaN	1.14985	NaN	NaN	S	3	0.249999	0.00424097	53.545	0	0	NaN
Q9UQB8-3;Q9UQB8-5;Q9UQB8-4;Q9UQB8-6;Q9UQB8-2;Q9UQB8;I3L4C2;F8W878;B4DWA1;I3L3C6	453;453;453;454;453;453;486;375;316;135	Q9UQB8-3	Brain-specific angiogenesis inhibitor 1-associated protein 2	BAIAP2	0	NaN	DGSDRLHMSLQQGKSSSTGNLLDKDDLAIPP		NaN	0.92729	NaN	1.14985	NaN	NaN	S	3	0.249999	0.00424097	53.545	0	0	NaN
Q9UQB8-3;Q9UQB8-5;Q9UQB8-4;Q9UQB8-6;Q9UQB8-2;Q9UQB8;I3L4C2;F8W878;B4DWA1;I3L3C6	455;455;455;456;455;455;488;377;318;137	Q9UQB8-3	Brain-specific angiogenesis inhibitor 1-associated protein 2	BAIAP2	0	NaN	SDRLHMSLQQGKSSSTGNLLDKDDLAIPPPD		NaN	0.92729	NaN	1.14985	NaN	NaN	T	3	0.249999	0.00424097	53.545	0	0	NaN
Q9UQB8-3;Q9UQB8-5;Q9UQB8-4;Q9UQB8-6;Q9UQB8-2;Q9UQB8;I3L4C2;F8W878;B4DWA1;I3L2M4	259;259;259;259;259;259;292;181;122;201	Q9UQB8-3	Brain-specific angiogenesis inhibitor 1-associated protein 2	BAIAP2	0.942791	0.437225	MQQVASNGATLPSALSASKSNLVISDPIPGA	1	1.44371	0.92729	1.50787	1.14985	0.516423	0.358026	S	3	0.798831	3.55e-05	92.258	6.64256	1.85899	1.47579
Q9UQB8-3;Q9UQB8-5;Q9UQB8-4;Q9UQB8-6;Q9UQB8-2;Q9UQB8;I3L4C2;F8W878;B4DWA1;I3L2M4	261;261;261;261;261;261;294;183;124;203	Q9UQB8-3	Brain-specific angiogenesis inhibitor 1-associated protein 2	BAIAP2	0.733466	0.397309	QVASNGATLPSALSASKSNLVISDPIPGAKP	1	1.44324	0.92729	1.42852	1.14985	0.515945	0.278673	S	2	0.917456	7.06e-17	245.07	10.4618	2.48643	1.43588
I3L0Y9;Q9UQB8-3;Q9UQB8-5;Q9UQB8-4;Q9UQB8-6;Q9UQB8-2;Q9UQB8;I3L4C2;F8W878;B4DWA1;I3L3C6	123;366;366;366;367;366;366;399;288;229;48	I3L0Y9;Q9UQB8-3	Brain-specific angiogenesis inhibitor 1-associated protein 2	BAIAP2	0.226092	0.0895291	NSYATTENKTLPRSSSMAAGLER________;NSYATTENKTLPRSSSMAAGLERNGRMRVKA	1	1.1377	0.92729	1.11849	1.14985	0.21041	-0.031352	S	2	0.999888	0.00389211	141.13	39.5955	2.26603	1.1281
I3L0Y9;Q9UQB8-3;Q9UQB8-5;Q9UQB8-4;Q9UQB8-6;Q9UQB8-2;Q9UQB8;I3L4C2;F8W878;B4DWA1;I3L3C6	82;325;325;325;325;325;325;358;247;188;6	I3L0Y9;Q9UQB8-3	Brain-specific angiogenesis inhibitor 1-associated protein 2	BAIAP2	0.0823689	0.0535536	YSPWADRKAAQPKSLSPPQSQSKLSDSYSNT	1	1.17332	0.92729	1.01092	1.14985	0.246029	-0.138922	S	2	0.999987	0.00406165	141.82	49.0306	1.32564	1.09212
Q9UQB8-3;Q9UQB8-5;Q9UQB8-4;Q9UQB8-6;Q9UQB8-2;Q9UQB8;I3L4C2;F8W878;B4DWA1;I3L3C6	492;492;492;493;492;492;525;414;355;174	Q9UQB8-3	Brain-specific angiogenesis inhibitor 1-associated protein 2	BAIAP2	0.417199	-0.0941285	AFPAQTASGFKQRPYSVAVPAFSQGLDDYGA	1	0.897705	0.92729	0.991173	1.14985	-0.0295846	-0.158672	S	3	0.999943	5.25e-06	149.3	42.4382	1.50202	0.944439
I3L0Y9;Q9UQB8-3;Q9UQB8-5;Q9UQB8-4;Q9UQB8-6;Q9UQB8-2;Q9UQB8;I3L4C2;F8W878;B4DWA1;I3L3C6	97;340;340;340;340;340;340;373;262;203;21	I3L0Y9;Q9UQB8-3	Brain-specific angiogenesis inhibitor 1-associated protein 2	BAIAP2	0.566401	-0.522302	SPPQSQSKLSDSYSNTLPVRKSVTPKNSYAT	1	0.642193	0.92729	0.390338	1.14985	-0.285096	-0.759507	T	2	0.999876	7.41e-11	303.02	39.0687	0.81727	0.516265
Q9UQB8-3;Q9UQB8-5;Q9UQB8-4;Q9UQB8-6;Q9UQB8-2;Q9UQB8;I3L4C2;F8W878;B4DWA1;I3L3C6	454;454;454;455;454;454;487;376;317;136	Q9UQB8-3	Brain-specific angiogenesis inhibitor 1-associated protein 2	BAIAP2	1.08538	-0.720216	GSDRLHMSLQQGKSSSTGNLLDKDDLAIPPP	1	0.300534	0.92729	0.336169	1.14985	-0.626756	-0.813676	S	2	0.999272	0.00403484	125.82	31.6962	1.44863	0.318351
Q9UHR4	423	Q9UHR4	Brain-specific angiogenesis inhibitor 1-associated protein 2-like protein 1	BAIAP2L1	0	NaN	VTVPTPSPTPVRSISTVNLSENSSVVIPPPD		NaN	0.0398403	NaN	0.00934718	NaN	NaN	T	3	0.374991	1.12e-10	171.41	0.79164	0	NaN
Q9UHR4	331	Q9UHR4	Brain-specific angiogenesis inhibitor 1-associated protein 2-like protein 1	BAIAP2L1	0.904213	0.860463	NSTGTSEDPSLQRSVSVATGLNMMKKQKVKT	1	1.07101	0.0398403	0.699107	0.00934718	1.03117	0.68976	S	2	0.999994	0.000312779	188.92	52.5982	0.879966	0.885057
Q9UHR4	261	Q9UHR4	Brain-specific angiogenesis inhibitor 1-associated protein 2-like protein 1	BAIAP2L1	0.539445	0.121393	IKTPASTPVSGTPQASPMIERSNVVRKDYDT	1;2	0.102053	0.0398403	0.189919	0.00934718	0.0622131	0.180572	S	3	1	4.2e-19	311.21	83.2317	0.730264	0.145986
Q9UHR4	412	Q9UHR4	Brain-specific angiogenesis inhibitor 1-associated protein 2-like protein 1	BAIAP2L1	1.44703	-0.4562	TKLLEENETEAVTVPTPSPTPVRSISTVNLS	1	-0.441987	0.0398403	-0.421225	0.00934718	-0.481828	-0.430573	T	2	0.51421	3.55e-10	217.41	1.39541	1.81506	-0.431606
Q9UHR4	414	Q9UHR4	Brain-specific angiogenesis inhibitor 1-associated protein 2-like protein 1	BAIAP2L1	0.759554	-0.577409	LLEENETEAVTVPTPSPTPVRSISTVNLSEN	1	-0.699396	0.0398403	-0.406235	0.00934718	-0.739236	-0.415582	S	3	0.739149	5.17e-05	103.36	6.82279	0.782505	-0.552816
Q9UHR4	257	Q9UHR4	Brain-specific angiogenesis inhibitor 1-associated protein 2-like protein 1	BAIAP2L1	0.530237	-0.90771	MIEEIKTPASTPVSGTPQASPMIERSNVVRK	1;2	-0.414384	0.0398403	-1.35185	0.00934718	-0.454224	-1.36119	T	3	0.999889	4.2e-19	311.21	39.536	0.507736	-0.883116
F8W6N3;Q92560;H0Y8E8	565;583;84	F8W6N3	Ubiquitin carboxyl-terminal hydrolase;Ubiquitin carboxyl-terminal hydrolase BAP1	BAP1	0	NaN	GVLSPLALTEGGKGSSPSIRPIQGSQGSSSP	2	NaN	NaN	NaN	-0.0413875	NaN	NaN	S	3	0.943118	6.38e-05	98.991	14.7062	0	NaN
F8W6N3;Q92560;H0Y8E8	577;595;96	F8W6N3	Ubiquitin carboxyl-terminal hydrolase;Ubiquitin carboxyl-terminal hydrolase BAP1	BAP1	0	NaN	KGSSPSIRPIQGSQGSSSPVEKEVVEATDSR		NaN	NaN	NaN	-0.0413875	NaN	NaN	S	3	0.4233	0.000972679	58.087	1.86651	0	NaN
F8W6N3;Q92560;H0Y8E8	502;520;21	F8W6N3	Ubiquitin carboxyl-terminal hydrolase;Ubiquitin carboxyl-terminal hydrolase BAP1	BAP1	0	NaN	SPLRSPIRSANPTRPSSPVTSHISKVLFGED		NaN	NaN	NaN	-0.0413875	NaN	NaN	S	3	0.460377	0.000634924	67.227	0.466796	0	NaN
F8W6N3;Q92560	274;292	F8W6N3	Ubiquitin carboxyl-terminal hydrolase;Ubiquitin carboxyl-terminal hydrolase BAP1	BAP1	0	1.31878	QESQLPEESKSASNKSPLVLEANRAPAASEG	1	0.954941	NaN	1.27739	-0.0413875	NaN	1.31878	S	2	1	0.00399868	106.67	50.4835	1.03941	1.11617
F8W6N3;Q92560;H0Y8E8	503;521;22	F8W6N3	Ubiquitin carboxyl-terminal hydrolase;Ubiquitin carboxyl-terminal hydrolase BAP1	BAP1	0	-0.0988338	PLRSPIRSANPTRPSSPVTSHISKVLFGEDD	1	-0.203485	NaN	-0.140221	-0.0413875	NaN	-0.0988338	S	2	0.96483	0.000150731	170.8	14.7205	0.935985	-0.171853
F8W6N3;Q92560	309;327	F8W6N3	Ubiquitin carboxyl-terminal hydrolase;Ubiquitin carboxyl-terminal hydrolase BAP1	BAP1	0	-0.452965	GAEEAAGSCAQAPSHSPPNKPKLVVKPPGSS	1	-0.531844	NaN	-0.494353	-0.0413875	NaN	-0.452965	S	4	0.986825	5.1e-30	246.27	20.538	1.63361	-0.513099
F8W6N3;Q92560	377;395	F8W6N3	Ubiquitin carboxyl-terminal hydrolase;Ubiquitin carboxyl-terminal hydrolase BAP1	BAP1	0	-0.832195	GVGRSRVPVRPPQQYSDDEDDYEDDEEDDVQ	1	-0.489382	NaN	-0.873582	-0.0413875	NaN	-0.832195	S	3	1	1.31e-40	296.25	125.957	0.757173	-0.681482
F8W6N3;Q92560;H0Y8E8	579;597;98	F8W6N3	Ubiquitin carboxyl-terminal hydrolase;Ubiquitin carboxyl-terminal hydrolase BAP1	BAP1	0	-0.965265	SSPSIRPIQGSQGSSSPVEKEVVEATDSREK	1;2	0.631151	NaN	-1.00665	-0.0413875	NaN	-0.965265	S	2	0.927942	6.38e-05	107.47	11.1519	0.0672619	-0.18775
Q8IXM2-2	35	Q8IXM2-2	Chromatin complexes subunit BAP18	BAP18	0	NaN	TKLGELTMQLHPVADSSPAGAQIKATVKRKV	1	-0.0577821	NaN	-0.178225	NaN	NaN	NaN	S	2	0.632135	2.48e-08	188.69	2.35121	0.522287	-0.118003
Q8IXM2-2	36	Q8IXM2-2	Chromatin complexes subunit BAP18	BAP18	0	NaN	KLGELTMQLHPVADSSPAGAQIKATVKRKVY	1	-0.250766	NaN	-0.178225	NaN	NaN	NaN	S	2	0.82727	9.54e-17	266.34	6.80279	0.972069	-0.214495
Q8IXM2;Q8IXM2-3;F8W038;H0YIS7	36;36;36;77	Q8IXM2	Chromatin complexes subunit BAP18	BAP18;C17orf49;RNASEK-C17orf49	0	0.235829	KLGELTMQLHPVADSSPAGAKWTETEIEMLR	1	0.0385766	-0.197252	NaN	0.0842003	0.235829	NaN	S	3	0.790038	8.42e-05	183.24	5.75506	0	0.0385766
Q8IXM2;Q8IXM2-3;F8W038;H0YIS7	35;35;35;76	Q8IXM2	Chromatin complexes subunit BAP18	BAP18;C17orf49;RNASEK-C17orf49	0.588941	-0.253362	TKLGELTMQLHPVADSSPAGAKWTETEIEML	1	-0.559154	-0.197252	-0.0606229	0.0842003	-0.361902	-0.144823	S	2	0.797951	1.63e-12	237.19	5.96518	0.365274	-0.309889
E7EUI3;Q99728	220;364	E7EUI3	BRCA1-associated RING domain protein 1	BARD1	0	NaN	KQTVPSENIPLPECSSPPSCKRKVGGTSGRK		-0.388884	NaN	-0.865174	NaN	NaN	NaN	S	3	0.575453	0.0139988	45.941	4.33175	0.636248	-0.627029
E7EUI3;Q99728	265;409	E7EUI3	BRCA1-associated RING domain protein 1	BARD1	0	NaN	TPPSTLSSSSYRRVMSSPSAMKLLPNMAVKR	1	NaN	NaN	-0.10341	NaN	NaN	NaN	S	2	0.593692	0.0108611	70.942	2.40581	0	-0.10341
E7EUI3;Q99728	266;410	E7EUI3	BRCA1-associated RING domain protein 1	BARD1	0	NaN	PPSTLSSSSYRRVMSSPSAMKLLPNMAVKRN	1	0.206893	NaN	NaN	NaN	NaN	NaN	S	2	0.839042	0.00313801	138.99	7.17258	0	0.206893
P80723;P80723-2	194;140	P80723	Brain acid soluble protein 1	BASP1	0	NaN	AAPSSKETPAATEAPSSTPKAQGPAASAEEP		NaN	NaN	NaN	NaN	NaN	NaN	S	2	0.426933	0.000173584	195.28	0.284126	0	NaN
P80723;P80723-2	164;110	P80723	Brain acid soluble protein 1	BASP1	0	NaN	KKTEAPAAPAAQETKSDGAPASDSKPGSSEA	1	-0.593093	NaN	NaN	NaN	NaN	NaN	S	2	1	0.00150969	125.35	67.616	0	-0.593093
P80723;P80723-2	196;142	P80723	Brain acid soluble protein 1	BASP1	0	NaN	PSSKETPAATEAPSSTPKAQGPAASAEEPKP		NaN	NaN	NaN	NaN	NaN	NaN	T	2	0.411169	0.00068903	171.87	0.0857912	0	NaN
Q9NR55	92	Q9NR55	Basic leucine zipper transcriptional factor ATF-like 3	BATF3	0	NaN	LRREIGKLTEELKHLTEALKEHEKMCPLLLC	1	NaN	NaN	NaN	NaN	NaN	NaN	T	3	0.999933	0.0263398	49.081	41.7619	0	NaN
Q9NRL2;Q9NRL2-2	1417;1385	Q9NRL2	Bromodomain adjacent to zinc finger domain protein 1A	BAZ1A	0	NaN	SESKRRCRKRQSPEPSPVTLGRRSSGRQGGV	2	NaN	-0.0501887	NaN	-0.0714363	NaN	NaN	S	3	0.999992	0.000360752	99.723	51.1067	0	NaN
Q9NRL2;Q9NRL2-2	1402;1370	Q9NRL2	Bromodomain adjacent to zinc finger domain protein 1A	BAZ1A	0.788219	1.21641	QSRSVNIASKLSLQESESKRRCRKRQSPEPS	1	1.48434	-0.0501887	0.826843	-0.0714363	1.53453	0.89828	S	2	0.984213	0.00154648	124.06	17.9478	0.753383	1.15559
Q9NRL2;Q9NRL2-2	1279;1247	Q9NRL2	Bromodomain adjacent to zinc finger domain protein 1A	BAZ1A	1.08378	0.646351	GRPQVRLPVKTRGKLSSSFSSRGQQQEPGRY	1	0.511974	-0.0501887	0.659103	-0.0714363	0.562163	0.730539	S	2	0.971015	0.023776	96.464	15.5589	1.09928	0.585538
Q9NRL2;Q9NRL2-2	1547;1515	Q9NRL2	Bromodomain adjacent to zinc finger domain protein 1A	BAZ1A	2.28081	0.475798	KLGLHVTPSNVDQVSTPPAAKKSRI______	1	0.421695	-0.0501887	0.408277	-0.0714363	0.471883	0.479713	T	2	0.988128	3.59e-07	176.77	19.2028	1.98755	0.414986
Q9NRL2;Q9NRL2-2	1363;1331	Q9NRL2	Bromodomain adjacent to zinc finger domain protein 1A	BAZ1A	0.845992	0.394739	FVELLSPRRKRRGRKSANNTPENSPNFPNFR	1	0.434455	-0.0501887	0.233397	-0.0714363	0.484644	0.304834	S	2	0.996334	0.00461758	64.249	24.3444	0.730112	0.333926
Q9NRL2;Q9NRL2-2	1281;1249	Q9NRL2	Bromodomain adjacent to zinc finger domain protein 1A	BAZ1A	0.76751	0.309034	PQVRLPVKTRGKLSSSFSSRGQQQEPGRYPS	1	0.343806	-0.0501887	0.152638	-0.0714363	0.393994	0.224074	S	2	0.784747	0.00715647	99.283	6.18696	0.630775	0.248222
Q9NRL2;Q9NRL2-2	961;929	Q9NRL2	Bromodomain adjacent to zinc finger domain protein 1A	BAZ1A	0.0627731	0.227052	KPQPDSKPTYSRGRSSNAYDPSQMCAEKQLE	1	1.23487	-0.0501887	-0.902389	-0.0714363	1.28506	-0.830953	S	2	0.499952	0.00421708	69.361	0	0.0449126	0.16624
Q9NRL2;Q9NRL2-2	960;928	Q9NRL2	Bromodomain adjacent to zinc finger domain protein 1A	BAZ1A	0.0310401	0.10142	DKPQPDSKPTYSRGRSSNAYDPSQMCAEKQL	1	0.983605	-0.0501887	-0.902389	-0.0714363	1.03379	-0.830953	S	2	0.660288	1.18e-07	230.55	2.88622	0.0120646	0.0406078
Q9NRL2;Q9NRL2-2	731;699	Q9NRL2	Bromodomain adjacent to zinc finger domain protein 1A	BAZ1A	0.783647	0.0352114	ESKDTEQKELDQDMVTEDEDDPGSHKRGRRG	1	-0.0056665	-0.0501887	-0.0455356	-0.0714363	0.0445222	0.0259007	T	2	1	1.69e-30	355.17	159.683	0.375529	-0.0256011
Q9NRL2;Q9NRL2-2	270;270	Q9NRL2	Bromodomain adjacent to zinc finger domain protein 1A	BAZ1A	0	-0.0549121	DFSYFFPDDPPTFIFSPANRRRGRPPKRIHI	1	-0.105101	-0.0501887	NaN	-0.0714363	-0.0549121	NaN	S	3	0.994584	0.000301291	60.363	22.6744	0	-0.105101
Q9NRL2;Q9NRL2-2	1413;1381	Q9NRL2	Bromodomain adjacent to zinc finger domain protein 1A	BAZ1A	1.00792	-0.16951	SLQESESKRRCRKRQSPEPSPVTLGRRSSGR	1;2	-0.246053	-0.0501887	-0.214592	-0.0714363	-0.195864	-0.143155	S	3	1	6.68e-05	240.61	79.7662	1.36238	-0.230322
Q9NRL2;Q9NRL2-2	850;818	Q9NRL2	Bromodomain adjacent to zinc finger domain protein 1A	BAZ1A	0.448694	-0.336872	DMLLPRPSSFQNNVQSQDPQVSTKTGEPLMS	1	-0.597802	-0.0501887	-0.197567	-0.0714363	-0.547613	-0.126131	S	2	0.999953	0.00054472	100.39	46.0808	0.527539	-0.397684
Q9NRL2;Q9NRL2-2	286;286	Q9NRL2	Bromodomain adjacent to zinc finger domain protein 1A	BAZ1A	0	-0.450513	PANRRRGRPPKRIHISQEDNVANKQTLASYR	1	NaN	-0.0501887	-0.52195	-0.0714363	NaN	-0.450513	S	2	1	0.00195251	130.87	130.869	0	-0.52195
Q9UIG0-2;Q9UIG0	158;158	Q9UIG0-2	Tyrosine-protein kinase BAZ1B	BAZ1B	0	NaN	VDEEATEKKSDGACDSPSSDKENSSQIAQDH	2	NaN	-0.129955	NaN	-0.125384	NaN	NaN	S	2	0.998916	6.15e-05	185.23	27.6181	0	NaN
Q9UIG0-2;Q9UIG0	161;161	Q9UIG0-2	Tyrosine-protein kinase BAZ1B	BAZ1B	0	NaN	EATEKKSDGACDSPSSDKENSSQIAQDHQKK	2	NaN	-0.129955	NaN	-0.125384	NaN	NaN	S	2	0.627503	0.000162907	185.23	2.25742	0	NaN
Q9UIG0-2;Q9UIG0	701;705	Q9UIG0-2	Tyrosine-protein kinase BAZ1B	BAZ1B	0	NaN	ELVRLCLRRSDVQEESEGSDTDDNKDSAAFE	2	NaN	-0.129955	NaN	-0.125384	NaN	NaN	S	2	0.999999	2.19e-21	277.64	59.7782	0	NaN
Q9UIG0-2;Q9UIG0	704;708	Q9UIG0-2	Tyrosine-protein kinase BAZ1B	BAZ1B	0	NaN	RLCLRRSDVQEESEGSDTDDNKDSAAFEDNE	2	NaN	-0.129955	NaN	-0.125384	NaN	NaN	S	2	0.999272	2.19e-21	277.64	31.3739	0	NaN
Q9UIG0-2;Q9UIG0	361;361	Q9UIG0-2	Tyrosine-protein kinase BAZ1B	BAZ1B	2.18997	0.841413	LSGSPLKVKNSKNSKSPEEHLEEMMKMMSPN	1	0.702923	-0.129955	0.724563	-0.125384	0.832878	0.849947	S	2	1	4.02e-05	203.71	160.067	2.01548	0.713743
Q9UIG0-2;Q9UIG0	1338;1342	Q9UIG0-2	Tyrosine-protein kinase BAZ1B	BAZ1B	1.16535	0.560018	VDELVLQTKRSSRRQSLELQKCEEILHKIVK	1	0.369718	-0.129955	0.494979	-0.125384	0.499673	0.620363	S	2	1	8.01e-05	205.97	88.5961	1.03818	0.432348
Q9UIG0-2;Q9UIG0	330;330	Q9UIG0-2	Tyrosine-protein kinase BAZ1B	BAZ1B	1.22621	0.44598	RKPSKKSKTDNSSLSSPLNPKLWCHVHLKKS	1	0.274292	-0.129955	0.36233	-0.125384	0.404246	0.487714	S	2	0.967279	0.000725093	168.05	14.8387	1.05808	0.318311
Q9UIG0-2;Q9UIG0	1464;1468	Q9UIG0-2	Tyrosine-protein kinase BAZ1B	BAZ1B	1.59142	0.167973	KRKKFPDRLAEDEGDSEPEAVGQSRGRRQKK	1	0.0312541	-0.129955	0.049352	-0.125384	0.161209	0.174736	S	2	1	5.42e-23	328.45	93.7066	0.852002	0.0403031
Q9UIG0-2;Q9UIG0	829;833	Q9UIG0-2	Tyrosine-protein kinase BAZ1B	BAZ1B	0.84317	0.122703	TDRKKEIVKFEPQVDTEAEDMISAVKSRRLL	1	-0.035387	-0.129955	0.0254541	-0.125384	0.0945679	0.150838	T	2	0.999542	0.0103975	53.998	33.392	0.04722	-0.00496646
Q9UIG0-2;Q9UIG0	943;947	Q9UIG0-2	Tyrosine-protein kinase BAZ1B	BAZ1B	0.779274	0.0981478	SIDYRFNHHCKDHTVSGDEDYCPRSKKANLG	1	-0.00557957	-0.129955	-0.0534637	-0.125384	0.124375	0.0719203	S	2	0.963537	7.38e-05	244.36	14.2202	0.36271	-0.0295217
Q9UIG0-2;Q9UIG0	349;349	Q9UIG0-2	Tyrosine-protein kinase BAZ1B	BAZ1B	0.411589	0.0819907	PKLWCHVHLKKSLSGSPLKVKNSKNSKSPEE	1	0.00920381	-0.129955	-0.100561	-0.125384	0.139159	0.0248226	S	2	0.999994	0.00677829	120.63	52.0047	0.253285	-0.0456788
Q9UIG0-2;Q9UIG0	160;160	Q9UIG0-2	Tyrosine-protein kinase BAZ1B	BAZ1B	0	-1.38726	EEATEKKSDGACDSPSSDKENSSQIAQDHQK	1;2	-1.51721	-0.129955	NaN	-0.125384	-1.38726	NaN	S	2	0.937184	6.15e-05	185.28	10.768	0	-1.51721
J3QK86;J3KPG5;F8VU39;Q9UIF9-2;Q9UIF9-3;Q9UIF9	1525;1527;1555;1530;1553;1557	J3QK86	Bromodomain adjacent to zinc finger domain protein 2A	BAZ2A	0	NaN	SPDSTREDLAYCEHLSDSQEDITWRGRGREG		NaN	0.0174944	NaN	-0.0437649	NaN	NaN	S	3	0.499471	0.0030821	63.979	0	0	NaN
J3QK86;J3KPG5;F8VU39;Q9UIF9-2;Q9UIF9-3;Q9UIF9	1527;1529;1557;1532;1555;1559	J3QK86	Bromodomain adjacent to zinc finger domain protein 2A	BAZ2A	0	NaN	DSTREDLAYCEHLSDSQEDITWRGRGREGLA		NaN	0.0174944	NaN	-0.0437649	NaN	NaN	S	3	0.499471	0.0030821	63.979	0	0	NaN
J3QK86;J3KPG5;F8VU39;Q9UIF9-2;Q9UIF9-3;Q9UIF9;H0YHL2	1365;1367;1395;1370;1397;1397;66	J3QK86	Bromodomain adjacent to zinc finger domain protein 2A	BAZ2A	1.25069	0.554384	LAPKRRAGDPGEMPQSPTGLGQPKRRGRPPS	1	0.522859	0.0174944	0.559639	-0.0437649	0.505365	0.603403	S	2	0.990068	2.59e-05	181.65	19.9864	1.66511	0.541249
J3QK86;J3KPG5;F8VU39;Q9UIF9-2;Q9UIF9-3;Q9UIF9	132;134;132;137;134;134	J3QK86	Bromodomain adjacent to zinc finger domain protein 2A	BAZ2A	0	0.42693	GQYPLNGILGGSRQPSSPSHNTNLRAGSQEF	1	NaN	0.0174944	0.383165	-0.0437649	NaN	0.42693	S	2	0.874469	0.0019511	135.5	8.43018	0	0.383165
J3QK86;J3KPG5;F8VU39;Q9UIF9-2;Q9UIF9-3;Q9UIF9	1751;1753;1781;1756;1779;1783	J3QK86	Bromodomain adjacent to zinc finger domain protein 2A	BAZ2A	1.1306	0.339069	RESPAAGPRYSEEGLSPSKRRRLSMRNHHSD	1	0.316957	0.0174944	0.334911	-0.0437649	0.299462	0.378676	S	2	0.992531	0.00260382	188.96	21.2347	1.75621	0.325934
J3QK86;J3KPG5;F8VU39;Q9UIF9-2;Q9UIF9-3;Q9UIF9	1152;1154;1182;1157;1184;1184	J3QK86	Bromodomain adjacent to zinc finger domain protein 2A	BAZ2A	0.565543	0.255422	FSMKMELAGSNTTASSPARARGRPRKTKPGS	1	0.156655	0.0174944	0.327917	-0.0437649	0.139161	0.371682	S	2	0.945283	3.13e-05	206.64	12.3745	0.664991	0.242286
J3QK86;J3KPG5;F8VU39;Q9UIF9-2;Q9UIF9-3;Q9UIF9	133;135;133;138;135;135	J3QK86	Bromodomain adjacent to zinc finger domain protein 2A	BAZ2A	0	0.254409	QYPLNGILGGSRQPSSPSHNTNLRAGSQEFW	1	0.271904	0.0174944	NaN	-0.0437649	0.254409	NaN	S	2	0.937735	0.00209671	117.77	11.8236	0	0.271904
J3QK86;J3KPG5;F8VU39;Q9UIF9-2;Q9UIF9-3;Q9UIF9	1019;1021;1049;1024;1051;1051	J3QK86	Bromodomain adjacent to zinc finger domain protein 2A	BAZ2A	0.958603	0.184447	ECLGRRRSSRIMEETSGMEEEEEEESIAAVP	1	0.234133	0.0174944	0.108491	-0.0437649	0.216639	0.152256	S	2	0.941538	9.74e-05	117.03	12.0697	0.65022	0.171312
J3QK86;J3KPG5;F8VU39;Q9UIF9-2;Q9UIF9-3;Q9UIF9	1018;1020;1048;1023;1050;1050	J3QK86	Bromodomain adjacent to zinc finger domain protein 2A	BAZ2A	0	0.152256	EECLGRRRSSRIMEETSGMEEEEEEESIAAV	1	NaN	0.0174944	0.108491	-0.0437649	NaN	0.152256	T	2	0.5	0.000340053	74.364	0	0	0.108491
J3QK86;J3KPG5;F8VU39;Q9UIF9-2;Q9UIF9-3;Q9UIF9;H0YHL2	1338;1340;1368;1343;1370;1370;39	J3QK86	Bromodomain adjacent to zinc finger domain protein 2A	BAZ2A	0.872406	0.125888	ASSKPMNRPSAANPCSPVQFSSTPLAGLAPK	1	0.17031	0.0174944	0.0551957	-0.0437649	0.152815	0.0989606	S	3	0.999198	2.73e-05	87.674	30.9857	0.522188	0.112753
J3QK86;J3KPG5;F8VU39;Q9UIF9-2;Q9UIF9-3;Q9UIF9	1738;1740;1768;1743;1766;1770	J3QK86	Bromodomain adjacent to zinc finger domain protein 2A	BAZ2A	0.213374	-0.0857307	EGDGRRRRVLLRGRESPAAGPRYSEEGLSPS	1	-0.190964	0.0174944	-0.00676763	-0.0437649	-0.208459	0.0369972	S	2	1	0.0169602	111.81	79.0365	0.321074	-0.0988659
J3QK86;J3KPG5;F8VU39;Q9UIF9-2;Q9UIF9-3;Q9UIF9;H0YHQ7	475;477;505;480;507;507;155	J3QK86	Bromodomain adjacent to zinc finger domain protein 2A	BAZ2A	0	-0.257252	SPKASPVTSPAAAFPTASPANKDVSSFLETT	1	NaN	0.0174944	-0.301017	-0.0437649	NaN	-0.257252	T	2	0.932342	0.00503322	60.171	11.3998	0	-0.301017
J3QK86;J3KPG5;F8VU39;Q9UIF9-2;Q9UIF9-3;Q9UIF9;H0YHQ7	467;469;497;472;499;499;147	J3QK86	Bromodomain adjacent to zinc finger domain protein 2A	BAZ2A	0	-0.290071	VPLTASVTSPKASPVTSPAAAFPTASPANKD	1	-0.272576	0.0174944	NaN	-0.0437649	-0.290071	NaN	T	2	0.581962	0.000249903	108.14	2.12791	0	-0.272576
J3QK86;J3KPG5;F8VU39;Q9UIF9-2;Q9UIF9-3;Q9UIF9;H0YHQ7	477;479;507;482;509;509;157	J3QK86	Bromodomain adjacent to zinc finger domain protein 2A	BAZ2A	1.01258	-0.323437	KASPVTSPAAAFPTASPANKDVSSFLETTAD	1;2	-0.256201	0.0174944	-0.416943	-0.0437649	-0.273695	-0.373178	S	2	0.998277	1.09e-05	168.92	27.6305	0.826155	-0.336572
J3QK86;J3KPG5;F8VU39;Q9UIF9-2;Q9UIF9-3;Q9UIF9;H0YHQ7	464;466;494;469;496;496;144	J3QK86	Bromodomain adjacent to zinc finger domain protein 2A	BAZ2A	0.495571	-0.339236	SLEVPLTASVTSPKASPVTSPAAAFPTASPA	1;2	-0.50787	0.0174944	-0.196872	-0.0437649	-0.525364	-0.153107	S	2	0.999949	1.09e-05	168.92	42.9326	0.577455	-0.352371
J3QK86;J3KPG5;F8VU39;Q9UIF9-2;Q9UIF9-3;Q9UIF9	1175;1177;1205;1180;1207;1207	J3QK86	Bromodomain adjacent to zinc finger domain protein 2A	BAZ2A	0.693834	-0.390025	PRKTKPGSMQPRHLKSPVRGQDSEQPQAQLQ	1	-0.500871	0.0174944	-0.30545	-0.0437649	-0.518365	-0.261685	S	4	0.994823	3.27e-25	246.91	22.8364	0.81995	-0.40316
Q9UIF8-4;Q9UIF8-2;Q9UIF8-5;Q9UIF8-3;Q9UIF8	1484;1580;1644;1646;1680	Q9UIF8-4	Bromodomain adjacent to zinc finger domain protein 2B	BAZ2B	0	NaN	GNSFLTSNVASSKSESPVPQNEKATSAQPAA	1	NaN	NaN	0.801241	NaN	NaN	NaN	S	2	0.988641	0.0108724	75.89	19.397	0	0.801241
Q8TAM1	719	Q8TAM1	Bardet-Biedl syndrome 10 protein	BBS10	0	NaN	VITVKRHPQKVHNQDSEDEL___________	1	NaN	NaN	NaN	NaN	NaN	NaN	S	2	1	0.00254859	99.5	53.4477	0	NaN
H3BRL0;Q9BXC9	365;365	H3BRL0	Bardet-Biedl syndrome 2 protein	BBS2	0	NaN	LELRNYEENAKAELASPLNEADGHRGIIPAN	1	1.26789	NaN	NaN	NaN	NaN	NaN	S	3	1	0.000737699	105.5	79.8366	0	1.2679
C9JA69;Q8WY36-2;Q8WY36	704;704;704	C9JA69	HMG box transcription factor BBX	BBX	0	NaN	LDEEFEKKFNSLPQYSPVTFDRKCVPVPRKK	1	-0.362733	NaN	0.0684644	NaN	NaN	NaN	S	2	0.988865	0.000800026	147.37	19.4898	0.208476	-0.147134
C9JA69;Q8WY36-2;Q8WY36;C9J8D0;A2RRM7;C9JYU6;C9JZA0	178;178;178;178;178;178;178	C9JA69	HMG box transcription factor BBX	BBX	0	NaN	TVNPRKKLWAFPSDSSRDLPSPKKAKTEEMP	1	0.4959	NaN	NaN	NaN	NaN	NaN	S	2	0.796529	0.0159973	66.004	6.77705	0	0.4959
C9JA69;Q8WY36-2;Q8WY36;C9J8D0;A2RRM7	243;243;243;243;243	C9JA69	HMG box transcription factor BBX	BBX	0	NaN	TCRPDVSESPELRQKSPLFQFAEISSSTSHS	1	1.39753	NaN	1.26051	NaN	NaN	NaN	S	2	1	7.02e-06	143.19	100.982	1.48428	1.32902
C9JA69;Q8WY36-2;Q8WY36;C9J8D0;A2RRM7;C9JYU6;C9JZA0	159;159;159;159;159;159;159	C9JA69	HMG box transcription factor BBX	BBX	0	NaN	NPGYKWCPTTNKPVKSPTPTVNPRKKLWAFP	1	1.13652	NaN	0.687956	NaN	NaN	NaN	S	2	0.97263	0.000167893	106.12	15.521	0.813964	0.912238
C9JA69;Q8WY36-2;Q8WY36;H7C1Q0	835;855;885;75	C9JA69	HMG box transcription factor BBX	BBX	0	NaN	CNDKCSHNTEVGETRSSTPEMPAVSAFFSLA		NaN	NaN	NaN	NaN	NaN	NaN	S	3	0.332074	0.00034135	51.321	0	0	NaN
C9JA69;Q8WY36-2;Q8WY36;H7C1Q0	836;856;886;76	C9JA69	HMG box transcription factor BBX	BBX	0	NaN	NDKCSHNTEVGETRSSTPEMPAVSAFFSLAA		NaN	NaN	NaN	NaN	NaN	NaN	S	3	0.332074	0.00034135	51.321	0	0	NaN
C9JA69;Q8WY36-2;Q8WY36	794;814;844	C9JA69	HMG box transcription factor BBX	BBX	0	NaN	KTKITHLVRTADGRVSPAGGTLDDKPKEQLQ	1	-0.092494	NaN	-0.159976	NaN	NaN	NaN	S	3	1	2.36e-08	242.5	71.136	0.779177	-0.126235
C9JA69;Q8WY36-2;Q8WY36;C9J8D0;A2RRM7;C9JYU6;C9JZA0	161;161;161;161;161;161;161	C9JA69	HMG box transcription factor BBX	BBX	0	NaN	GYKWCPTTNKPVKSPTPTVNPRKKLWAFPSD	1	0.895147	NaN	0.845591	NaN	NaN	NaN	T	2	0.979198	0.00339023	116.84	16.7509	1.74187	0.870369
C9JA69;Q8WY36-2;Q8WY36;H7C1Q0	837;857;887;77	C9JA69	HMG box transcription factor BBX	BBX	0	NaN	DKCSHNTEVGETRSSTPEMPAVSAFFSLAAL		NaN	NaN	NaN	NaN	NaN	NaN	T	3	0.332074	0.00034135	51.321	0	0	NaN
C9JA69;Q8WY36-2;Q8WY36	799;819;849	C9JA69	HMG box transcription factor BBX	BBX	0	NaN	HLVRTADGRVSPAGGTLDDKPKEQLQRSLPK	1	NaN	NaN	-0.198312	NaN	NaN	NaN	T	2	0.607051	0.00131406	126.55	1.88927	0	-0.198312
P51572;P51572-2	216;283	P51572	B-cell receptor-associated protein 31	BCAP31	0.0228521	0.159011	KLEKAENQVLAMRKQSEGLTKEYDRLLEEHA	1	-1.2614	0.550211	2.63013	0.500496	-1.81161	2.12963	S	2	0.999695	0.00703578	101.35	35.1592	0.105301	0.684365
P56945-5;P56945-8;P56945;P56945-7;P56945-3;P56945-2;P56945-6;F5H855;H3BVF0;H3BSY4;H3BQJ7;H3BSB2	137;139;139;157;139;157;185;110;110;110;110;110	P56945-5	Breast cancer anti-estrogen resistance protein 1	BCAR1	0	NaN	QQGLYQVPGPSPQFQSPPAKQTSTFSKQTPH	1	0.0408223	NaN	NaN	NaN	NaN	NaN	S	3	0.998778	6.48e-05	96.317	29.1232	0	0.0408223
P56945-5;P56945-8;P56945;P56945-7;P56945-3;P56945-2;P56945-6;F5H855;P56945-4	637;639;639;657;657;657;685;610;491	P56945-5	Breast cancer anti-estrogen resistance protein 1	BCAR1	0	NaN	NPTDKTSSIQSRPLPSPPKFTSQDSPDGQYE	1	0.709996	NaN	0.277747	NaN	NaN	NaN	S	2	1	0.0341208	78.939	78.9389	0.58069	0.493872
Q9H6U6-2;Q9H6U6;K7ESE9;Q9H6U6-6;Q9H6U6-3;Q9H6U6-8;Q9H6U6-7	480;480;251;251;480;480;480	Q9H6U6-2	Breast carcinoma-amplified sequence 3	BCAS3	0	NaN	EEIEQELTSKQGGRCSPVPGLSSSPSGSPLH	2	NaN	-0.440733	NaN	NaN	NaN	NaN	S	3	0.999975	9.92e-05	72.18	48.212	0	NaN
Q9H6U6-2;Q9H6U6;K7ESE9;Q9H6U6-6;Q9H6U6-3;Q9H6U6-8;Q9H6U6-7;K7EIE2	823;838;609;594;823;838;823;170	Q9H6U6-2	Breast carcinoma-amplified sequence 3	BCAS3	0	NaN	SGTFDRSVTLLEVCGSWPEGFGLRHMSSMEH	1	NaN	-0.440733	-0.166745	NaN	NaN	NaN	S	2	1	0.000414379	117.37	80.4491	0	-0.166746
Q9H6U6-2;Q9H6U6;K7ESE9;Q9H6U6-6;Q9H6U6-3;Q9H6U6-8	871;886;657;642;893;908	Q9H6U6-2	Breast carcinoma-amplified sequence 3	BCAS3	0	0.269414	SRDVVGSGTELQREGSIETLSNSSGSTSGSI	1	-0.17132	-0.440733	-0.491267	NaN	0.269414	NaN	S	2	0.999999	7.47e-06	156.23	61.0758	0.543047	-0.331293
Q9H6U6-2;Q9H6U6;K7ESE9;Q9H6U6-6;Q9H6U6-3;Q9H6U6-8;Q9H6U6-7	854;869;640;625;854;869;854	Q9H6U6-2	Breast carcinoma-amplified sequence 3	BCAS3	0	0.233672	TEEGLRERLADAMAESPSRDVVGSGTELQRE	1	-0.207061	-0.440733	-0.111352	NaN	0.233672	NaN	S	2	0.946111	4.22e-05	166.62	12.4447	0.730752	-0.159207
Q9H6U6-2;Q9H6U6;K7ESE9;Q9H6U6-6;Q9H6U6-3;Q9H6U6-8;Q9H6U6-7	488;488;259;259;488;488;488	Q9H6U6-2	Breast carcinoma-amplified sequence 3	BCAS3	0	0.0497128	SKQGGRCSPVPGLSSSPSGSPLHGKLNSQDS	1;2	-0.39102	-0.440733	-0.825057	NaN	0.0497128	NaN	S	2	0.78511	9.92e-05	94.359	7.53478	0.661051	-0.608039
Q9H6U6-2;Q9H6U6;K7ESE9;Q9H6U6-6;Q9H6U6-3;Q9H6U6-8;Q9H6U6-7	555;570;341;326;555;570;555	Q9H6U6-2	Breast carcinoma-amplified sequence 3	BCAS3	0	-0.071554	TITKRTGKVKPPPQISPSKSMGGEFCVAAIF	1	-0.512287	-0.440733	-0.359583	NaN	-0.071554	NaN	S	2	0.994938	0.000429962	202.8	22.9344	0.957103	-0.435935
Q9P287;Q9P287-3;Q9P287-2;Q9P287-4;B4E318	42;42;42;42;42	Q9P287;Q9P287-2	BRCA2 and CDKN1A-interacting protein	BCCIP	0.997967	0.487899	EEEKEVENEDEDDDDSDKEKDEEDEVIDEEV	1	0.545277	-0.0202673	0.379621	-0.030634	0.565544	0.410255	S	2	1	9.76e-70	387.26	356.118	0.947588	0.462449
F5H5P2;P12694;B4DP47;F5GXU9	372;338;341;309	F5H5P2	2-oxoisovalerate dehydrogenase subunit alpha, mitochondrial	BCKDHA	0	0.241035	PFLIEAMTYRIGHHSTSDDSSAYRSVDEVNY	1	-0.204798	-0.445834	NaN	-0.212668	0.241035	NaN	T	2	0.618575	0.000116143	218.83	2.11247	0	-0.204798
F5H5P2;P12694;B4DP47;F5GXU9	371;337;340;308	F5H5P2	2-oxoisovalerate dehydrogenase subunit alpha, mitochondrial	BCKDHA	0.670883	0.231268	QPFLIEAMTYRIGHHSTSDDSSAYRSVDEVN	1;2	-0.134018	-0.445834	-0.0619476	-0.212668	0.311816	0.15072	S	3	0.98682	8.75e-15	246.38	18.7497	0.649063	-0.0979827
F5H5P2;P12694;B4DP47;F5GXU9	381;347;350;318	F5H5P2	2-oxoisovalerate dehydrogenase subunit alpha, mitochondrial	BCKDHA	0.300374	0.196916	RIGHHSTSDDSSAYRSVDEVNYWDKQDHPIS	1;2	-0.0515338	-0.445834	-0.213136	-0.212668	0.3943	-0.0004682	S	2	1	8.75e-15	230.59	118.237	0.45721	-0.132335
Q96G95;A8MY43;O14874;H3BTL2;H3BS02;H3BQP2;H3BNP3	33;33;33;33;33;33;33	Q96G95	[3-methyl-2-oxobutanoate dehydrogenase [lipoamide]] kinase, mitochondrial	BCKDK	0	NaN	RPLLGPALALRARSTSATDTHHVEMARERSK	1	0.0396999	NaN	NaN	-0.112022	NaN	NaN	S	3	0.514915	0.000316644	112.34	1.11671	0	0.0396999
Q96G95;A8MY43;O14874;H3BTL2;H3BS02;H3BQP2;H3BNP3	32;32;32;32;32;32;32	Q96G95	[3-methyl-2-oxobutanoate dehydrogenase [lipoamide]] kinase, mitochondrial	BCKDK	0	0.233701	LRPLLGPALALRARSTSATDTHHVEMARERS	1	-0.109343	NaN	0.121679	-0.112022	NaN	0.233701	T	3	0.562097	0.00042951	95.197	2.31427	0.015005	0.00616772
Q96G95;A8MY43;O14874;H3BTL2;H3BS02;H3BQP2;H3BNP3	31;31;31;31;31;31;31	Q96G95	[3-methyl-2-oxobutanoate dehydrogenase [lipoamide]] kinase, mitochondrial	BCKDK	0	0.0896761	PLRPLLGPALALRARSTSATDTHHVEMARER	1	0.0650208	NaN	-0.0223464	-0.112022	NaN	0.0896761	S	2	0.935872	4.66e-45	385.33	12.231	0.148287	0.0213372
O95999	138	O95999	B-cell lymphoma/leukemia 10	BCL10	1.09831	0.735384	EPFPDGATNNLSRSNSDESNFSEKLRASTVM	1	1.03851	0.395721	1.0588	0.230818	0.642785	0.827983	S	2	1	0.000254888	267.93	69.3702	2.21041	1.04865
O95999	134	O95999	B-cell lymphoma/leukemia 10	BCL10	0.523114	0.0734698	CSSCEPFPDGATNNLSRSNSDESNFSEKLRA	1	0.506602	0.395721	0.266877	0.230818	0.110881	0.0360587	S	2	0.997945	4.7e-05	181.61	26.8629	0.718213	0.386739
F5H2Y4;Q9H165-2;Q9H165-4;Q9H165-6;Q9H165;Q9H165-3;Q9H165-5	86;86;120;86;86;86;120	F5H2Y4	B-cell lymphoma/leukemia 11A	BCL11A	0	NaN	CNGSLCLEKAVDKPPSPSPIEMKKASNPVEV	1	-0.634666	NaN	-0.613564	NaN	NaN	NaN	S	2	0.994569	0.000300178	194	22.6274	1.96814	-0.624115
F5H2Y4;Q9H165-2;Q9H165-4;Q9H165-6;Q9H165;B4DT16;Q9H165-3;Q9H165-5	171;205;239;171;205;53;205;239	F5H2Y4	B-cell lymphoma/leukemia 11A	BCL11A	0	NaN	QNTHGLRIYLESEHGSPLTPRVGIPSGLGAE	2	NaN	NaN	NaN	NaN	NaN	NaN	S	3	0.984276	0.000587618	103.9	17.9646	0	NaN
F5H2Y4;Q9H165-2;Q9H165-4;Q9H165-6;Q9H165;B4DT16	591;625;648;591;625;294	F5H2Y4	B-cell lymphoma/leukemia 11A	BCL11A	0	NaN	GESASGGLSKKLLLGSPSSLSPFSKRIKLEK	1;2	-0.0545721	NaN	NaN	NaN	NaN	NaN	S	2	0.997363	0.00130242	90.718	27.043	0	-0.0545721
F5H2Y4;Q9H165-2;Q9H165-4;Q9H165-6;Q9H165;B4DT16	596;630;653;596;630;299	F5H2Y4	B-cell lymphoma/leukemia 11A	BCL11A	0	NaN	GGLSKKLLLGSPSSLSPFSKRIKLEKEFDLP	2	NaN	NaN	NaN	NaN	NaN	NaN	S	2	0.937059	0.00130242	90.718	12.8471	0	NaN
F5H2Y4;Q9H165-2;Q9H165-4;Q9H165-6;Q9H165;B4DT16	667;701;724;667;701;370	F5H2Y4	B-cell lymphoma/leukemia 11A	BCL11A	0	NaN	SSSEHSSENGSLRFSTPPGELDGGISGRSGT	1	-0.14401	NaN	NaN	NaN	NaN	NaN	T	2	0.992913	0.00254858	79.489	21.4644	0	-0.14401
F5H2Y4;Q9H165-2;Q9H165-4;Q9H165-6;Q9H165;B4DT16;Q9H165-3;Q9H165-5	174;208;242;174;208;56;208;242	F5H2Y4	B-cell lymphoma/leukemia 11A	BCL11A	0	NaN	HGLRIYLESEHGSPLTPRVGIPSGLGAECPS	2	NaN	NaN	NaN	NaN	NaN	NaN	T	3	0.999804	0.000587618	103.9	37.0089	0	NaN
C9J417;O43521-11;O43521-10;O43521-14;O43521-19;O43521-4;O43521-8;O43521-12;O43521	86;86;86;86;86;86;86;86;86	C9J417	Bcl-2-like protein 11	BCL2L11	0	NaN	GPFATRSPLFIFMRRSSLLSRSSSGYFSFDT	1	-0.152837	NaN	NaN	NaN	NaN	NaN	S	2	0.945879	0.0233902	81.771	12.4252	0	-0.152837
Q9HB09-3;Q9HB09	191;192	Q9HB09-3	Bcl-2-like protein 12	BCL2L12	0	NaN	LVAQRLEQLVQEQLKSPPSPELQGPPSTEKE	2	NaN	0.731618	NaN	NaN	NaN	NaN	S	2	0.999999	0.00149335	65.833	62.3291	0	NaN
Q9HB09-3;Q9HB09	194;195	Q9HB09-3	Bcl-2-like protein 12	BCL2L12	0	0.533639	QRLEQLVQEQLKSPPSPELQGPPSTEKEAIL	1;2	1.26526	0.731618	NaN	NaN	0.533639	NaN	S	2	0.999991	0.00068695	168.68	50.6793	0	1.26526
Q9HB09-3;Q9HB09	241;242	Q9HB09-3	Bcl-2-like protein 12	BCL2L12	0	-0.505109	KLASDPALRSKLVRLSSDSFARLVELFCSRD	1	0.226509	0.731618	0.110497	NaN	-0.505109	NaN	S	2	0.998785	0.00903964	139.94	29.3435	0.675588	0.168503
Q9HB09-3;Q9HB09	272;273	Q9HB09-3	Bcl-2-like protein 12	BCL2L12	0	-0.729455	DSSRPSRACPGPPPPSPEPLARLALAMELSR	1	0.00216244	0.731618	0.223052	NaN	-0.729455	NaN	S	2	1	0.00157595	98.175	87.6757	0.306424	0.112607
Q9BXK5;B7Z238;Q9BXK5-4	298;174;136	Q9BXK5	Bcl-2-like protein 13	BCL2L13	0	NaN	PEEVKSLDSNGAGEKSENNSSNSDIVHVEKE	3	NaN	-0.223694	NaN	-0.0894822	NaN	NaN	S	2	0.999599	0.0022324	61.807	33.0592	0	NaN
Q9BXK5;B7Z238;Q9BXK5-4	302;178;140	Q9BXK5	Bcl-2-like protein 13	BCL2L13	0	NaN	KSLDSNGAGEKSENNSSNSDIVHVEKEEVPE	3	NaN	-0.223694	NaN	-0.0894822	NaN	NaN	S	2	0.877671	0.0022324	61.807	8.21784	0	NaN
Q9BXK5;B7Z238;Q9BXK5-4	305;181;143	Q9BXK5	Bcl-2-like protein 13	BCL2L13	0	NaN	DSNGAGEKSENNSSNSDIVHVEKEEVPEGME	1;3	NaN	-0.223694	NaN	-0.0894822	NaN	NaN	S	2	0.965401	1.32e-11	244.46	14.4804	0	NaN
Q9BXK5;B7Z238;Q9BXK5-4	370;246;208	Q9BXK5	Bcl-2-like protein 13	BCL2L13	0	NaN	LGTREPDTEVITVEKSSPATSLFVELDEEEV		NaN	-0.223694	NaN	-0.0894822	NaN	NaN	S	2	0.499488	0.0137927	57.806	0	0	NaN
Q9BXK5;B7Z238;Q9BXK5-4	371;247;209	Q9BXK5	Bcl-2-like protein 13	BCL2L13	0	NaN	GTREPDTEVITVEKSSPATSLFVELDEEEVK		NaN	-0.223694	NaN	-0.0894822	NaN	NaN	S	2	0.499488	0.0137927	57.806	0	0	NaN
Q9BXK5;B7Z238;Q9BXK5-4	444;320;282	Q9BXK5	Bcl-2-like protein 13	BCL2L13	2.26986	1.08817	SEKKPVPPSEGKSRLSPAGEMKPMPLSEGKS	1	0.873656	-0.223694	0.989502	-0.0894822	1.09735	1.07899	S	2	0.999329	0.0169948	112.24	31.728	1.40304	0.931579
Q9BXK5;Q9BXK5-2;E9PDD6;F2Z2C3;Q8IZP5	38;38;38;38;38	Q9BXK5	Bcl-2-like protein 13	BCL2L13	1.46494	0.850331	LGLLSQEKLQEQHLSSPQGVQLDIASQSLDQ	1	0.672471	-0.223694	0.715015	-0.0894822	0.896165	0.804497	S	3	0.80471	1.25e-06	144.24	6.14959	1.70964	0.693743
Q9BXK5;B7Z238;Q9BXK5-4	303;179;141	Q9BXK5	Bcl-2-like protein 13	BCL2L13	1.49128	0.394729	SLDSNGAGEKSENNSSNSDIVHVEKEEVPEG	1	0.191057	-0.223694	0.285225	-0.0894822	0.414751	0.374707	S	2	0.964567	7.88e-05	198.01	14.4452	0.905649	0.238141
Q9BXK5;B7Z238;Q9BXK5-4	420;296;258	Q9BXK5	Bcl-2-like protein 13	BCL2L13	0	0.23662	TETLLSEKEINAREESLVEELSPASEKKPVP	1	0.0129261	-0.223694	NaN	-0.0894822	0.23662	NaN	S	2	1	0.000241199	153.98	112.463	0	0.0129261
Q8N143	257	Q8N143	B-cell CLL/lymphoma 6 member B protein	BCL6B	0	NaN	SSSEEGPIPGPQSRLSPTAATVQFKCGAPAS	1	0.921741	NaN	0.77762	NaN	NaN	NaN	S	2	0.996336	0.00785763	83.856	24.3872	1.26872	0.84968
Q4VC05;Q4VC05-2	203;224	Q4VC05	B-cell CLL/lymphoma 7 protein family member A	BCL7A	0	NaN	DLEGVPPSKKMKLEASQQNSEEM________	1	NaN	NaN	NaN	NaN	NaN	NaN	S	2	0.989872	0.0433472	53.869	19.9006	0	NaN
Q4VC05;Q4VC05-2	207;228	Q4VC05	B-cell CLL/lymphoma 7 protein family member A	BCL7A	0	NaN	VPPSKKMKLEASQQNSEEM____________	1	NaN	NaN	NaN	NaN	NaN	NaN	S	2	1	0.000559507	147.73	70.088	0	NaN
Q4VC05;Q4VC05-2	113;113	Q4VC05	B-cell CLL/lymphoma 7 protein family member A	BCL7A	0	NaN	SIADASPIKQENSSNSSPAPEPNSAVPSDGT		NaN	NaN	NaN	NaN	NaN	NaN	S	3	0.411319	1.71e-05	91.416	0	0	NaN
Q4VC05;Q4VC05-2	114;114	Q4VC05	B-cell CLL/lymphoma 7 protein family member A	BCL7A	0	NaN	IADASPIKQENSSNSSPAPEPNSAVPSDGTE	1	-0.327059	NaN	-0.354114	NaN	NaN	NaN	S	2	0.894074	4.14e-09	183.1	10.0597	1.59735	-0.340586
Q9BQE9-2;Q9BQE9;Q9BQE9-3	52;112;112	Q9BQE9-2	B-cell CLL/lymphoma 7 protein family member B	BCL7B	0	NaN	VSDVYQLKVDSSTNSSPSPQQSESLSPAHTS	2	NaN	NaN	NaN	NaN	NaN	NaN	S	3	0.955951	1.63e-06	145.79	14.5127	0	NaN
Q9BQE9-2;Q9BQE9;Q9BQE9-3	60;120;120	Q9BQE9-2	B-cell CLL/lymphoma 7 protein family member B	BCL7B	0	NaN	VDSSTNSSPSPQQSESLSPAHTSDFRTDDSQ	2	NaN	NaN	NaN	NaN	NaN	NaN	S	3	0.501389	0.000588251	50.891	2.49988	0	NaN
Q9BQE9-2;Q9BQE9;Q9BQE9-3	62;122;122	Q9BQE9-2	B-cell CLL/lymphoma 7 protein family member B	BCL7B	0	NaN	SSTNSSPSPQQSESLSPAHTSDFRTDDSQPP	1;2	-0.135554	NaN	0.0594937	NaN	NaN	NaN	S	3	0.998857	1.35e-31	285.7	31.5626	0.117309	-0.0380303
Q9BQE9-2;Q9BQE9	71;131	Q9BQE9-2	B-cell CLL/lymphoma 7 protein family member B	BCL7B	0	NaN	QQSESLSPAHTSDFRTDDSQPPTLGQEILEE	1	NaN	NaN	-1.23409	NaN	NaN	NaN	T	3	0.504919	0.000405872	46.113	0.345619	0	-1.23409
I3L1Q2;Q8WUZ0;Q8WUZ0-2	97;97;97	I3L1Q2	B-cell CLL/lymphoma 7 protein family member C	BCL7C	0	NaN	RGGGPLILLDLNDENSNQSFHSEGSLQKGTE	1	-0.534496	NaN	-0.411522	NaN	NaN	NaN	S	3	0.999952	3.91e-44	324.97	43.2567	1.08463	-0.473009
I3L1Q2;Q8WUZ0;Q8WUZ0-2	126;126;126	I3L1Q2	B-cell CLL/lymphoma 7 protein family member C	BCL7C	0	NaN	TEPSPGGTPQPSRPVSPAGPPEGVPEEAQPP	1	-1.45451	NaN	-1.47045	NaN	NaN	NaN	S	3	0.998775	1.38e-11	185.31	29.1322	2.45968	-1.46248
O00512	687	O00512	B-cell CLL/lymphoma 9 protein	BCL9	0	NaN	GNNPIFPRIPVEGPLSPSRGDFPKGIPPQMG	1	-0.304808	NaN	-0.0718003	NaN	NaN	NaN	S	2	0.951385	0.000231528	133.7	12.9158	0.452566	-0.188304
O00512	288	O00512	B-cell CLL/lymphoma 9 protein	BCL9	0	NaN	PLDRESPGVENKLIPSVGSPASSTPLPPDGT		NaN	NaN	NaN	NaN	NaN	NaN	S	3	0.199971	0.00396355	41.475	0	0	NaN
O00512	291	O00512	B-cell CLL/lymphoma 9 protein	BCL9	0	NaN	RESPGVENKLIPSVGSPASSTPLPPDGTGPN		NaN	NaN	NaN	NaN	NaN	NaN	S	3	0.199971	0.00396355	41.475	0	0	NaN
O00512	294	O00512	B-cell CLL/lymphoma 9 protein	BCL9	0	NaN	PGVENKLIPSVGSPASSTPLPPDGTGPNSTP		NaN	NaN	NaN	NaN	NaN	NaN	S	3	0.199971	0.00396355	41.475	0	0	NaN
O00512	295	O00512	B-cell CLL/lymphoma 9 protein	BCL9	0	NaN	GVENKLIPSVGSPASSTPLPPDGTGPNSTPN		NaN	NaN	NaN	NaN	NaN	NaN	S	3	0.199971	0.00396355	41.475	0	0	NaN
O00512	278	O00512	B-cell CLL/lymphoma 9 protein	BCL9	0	NaN	PAPKPAAPPRPLDRESPGVENKLIPSVGSPA	1	-0.587641	NaN	-0.558835	NaN	NaN	NaN	S	2	1	1.96e-07	212.63	53.0333	1.79609	-0.573238
O00512	857	O00512	B-cell CLL/lymphoma 9 protein	BCL9	0	NaN	GRKPLDISVAGSQVHSPGINPLKSPTMHQVQ	1	0.913186	NaN	0.700883	NaN	NaN	NaN	S	3	0.996937	9.98e-08	174.4	25.2493	1.07957	0.807035
O00512	104	O00512	B-cell CLL/lymphoma 9 protein	BCL9	0	NaN	AGNGAKGKGKRERSISADSFDQRDPGTPNDD	1;2	0.760349	NaN	0.804301	NaN	NaN	NaN	S	2	0.999949	0.00238259	171.26	42.895	1.74767	0.782325
O00512	107	O00512	B-cell CLL/lymphoma 9 protein	BCL9	0	NaN	GAKGKGKRERSISADSFDQRDPGTPNDDSDI	2	NaN	NaN	NaN	NaN	NaN	NaN	S	2	0.999999	0.00956615	73.296	59.5054	0	NaN
O00512	907	O00512	B-cell CLL/lymphoma 9 protein	BCL9	0	NaN	LAGMLAGPAAAASIKSPPVLGSAAASPVHLK	1;2	NaN	NaN	-0.353321	NaN	NaN	NaN	S	2	1	0.000711112	103.02	80.2833	0	-0.353321
O00512	917	O00512	B-cell CLL/lymphoma 9 protein	BCL9	0	NaN	AASIKSPPVLGSAAASPVHLKSPSLPAPSPG	1;2	-0.367527	NaN	-0.589594	NaN	NaN	NaN	S	3	0.999999	2.01e-07	251.38	60.5383	0.83822	-0.47856
O00512	136	O00512	B-cell CLL/lymphoma 9 protein	BCL9	0	NaN	DIKECNSADHIKSQDSQHTPHSMTPSNATAP	1	-0.806317	NaN	-0.621622	NaN	NaN	NaN	S	3	0.623287	9.65e-05	93.21	3.9126	1.08678	-0.713969
O00512	10	O00512	B-cell CLL/lymphoma 9 protein	BCL9	0	NaN	______MHSSNPKVRSSPSGNTQSSPKSKQE	2	NaN	NaN	NaN	NaN	NaN	NaN	S	2	0.592105	0.00521989	87.208	1.69053	0	NaN
O00512	19	O00512	B-cell CLL/lymphoma 9 protein	BCL9	0	NaN	SNPKVRSSPSGNTQSSPKSKQEVMVRPPTVM	2	NaN	NaN	NaN	NaN	NaN	NaN	S	2	0.776526	0.00521989	87.208	5.63449	0	NaN
O00512	315	O00512	B-cell CLL/lymphoma 9 protein	BCL9	0	NaN	PDGTGPNSTPNNRAVTPVSQGSNSSSADPKA	1	-0.0987218	NaN	NaN	NaN	NaN	NaN	T	2	0.999993	0.000561352	111.99	51.3587	0	-0.0987218
O00512	115	O00512	B-cell CLL/lymphoma 9 protein	BCL9	0	NaN	ERSISADSFDQRDPGTPNDDSDIKECNSADH	1	0.238909	NaN	0.40294	NaN	NaN	NaN	T	2	1	0.000980884	193.32	94.2525	0.797824	0.320925
O00512	296	O00512	B-cell CLL/lymphoma 9 protein	BCL9	0	NaN	VENKLIPSVGSPASSTPLPPDGTGPNSTPNN		NaN	NaN	NaN	NaN	NaN	NaN	T	3	0.199971	0.00396355	41.475	0	0	NaN
O00512	257	O00512	B-cell CLL/lymphoma 9 protein	BCL9	0	NaN	ANQDQNSSQNTRLQPTPPIPAPAPKPAAPPR	1	-1.31029	NaN	-1.00831	NaN	NaN	NaN	T	2	1	0.0361414	42.947	42.9467	1.0838	-1.1593
O00512	155	O00512	B-cell CLL/lymphoma 9 protein	BCL9	0	NaN	PHSMTPSNATAPRSSTPSHGQTTATEPTPAQ	1	-0.125242	NaN	-1.54878	NaN	NaN	NaN	T	2	0.984968	2.51e-22	284.87	20.932	0.34811	-0.837009
Q86UU0-3;Q86UU0-4;Q86UU0-2;Q86UU0;E9PNR0	88;88;83;88;88	Q86UU0-3	B-cell CLL/lymphoma 9-like protein	BCL9L	0	NaN	KGVGAGNHGAKANQISPSNSSLKNPQAGVPP	1	0.359859	NaN	0.538141	NaN	NaN	NaN	S	2	0.996194	0.00205673	120.92	24.6389	0.903898	0.449
Q86UU0-3;Q86UU0-4;Q86UU0-2;Q86UU0;E9PNR0	21;21;16;21;21	Q86UU0-3	B-cell CLL/lymphoma 9-like protein	BCL9L	0	NaN	NKTRLPHPRRREAPGSPPLSPRGHCPPAPAK	1;2	NaN	NaN	-1.40717	NaN	NaN	NaN	S	2	1	0.00791673	72.311	72.3106	0	-1.40717
Q86UU0-3;Q86UU0-4;Q86UU0-2;Q86UU0;E9PNR0	25;25;20;25;25	Q86UU0-3	B-cell CLL/lymphoma 9-like protein	BCL9L	0	NaN	LPHPRRREAPGSPPLSPRGHCPPAPAKPMHP	2	NaN	NaN	NaN	NaN	NaN	NaN	S	2	1	0.00791673	72.311	72.3106	0	NaN
Q86UU0-3;Q86UU0-4;Q86UU0-2;Q86UU0	750;750;745;750	Q86UU0-3	B-cell CLL/lymphoma 9-like protein	BCL9L	0	NaN	GTPMGMEFGGGRGLLSPPMGQSGLREVDPPM	1	0.426963	NaN	NaN	NaN	NaN	NaN	S	2	0.999996	0.00390967	69.331	53.7038	0	0.426962
Q86UU0-3;Q86UU0-4;Q86UU0-2;Q86UU0	975;975;970;975	Q86UU0-3	B-cell CLL/lymphoma 9-like protein	BCL9L	0	NaN	QMVPLPSANPPGPLKSPQVLGSSLSVRSPTG	1	1.2658	NaN	1.29031	NaN	NaN	NaN	S	2	1	0.00209134	118.19	85.7308	2.21438	1.27805
Q86UU0-3;Q86UU0-4;Q86UU0-2;Q86UU0;E9PNR0	118;118;113;118;118	Q86UU0-3	B-cell CLL/lymphoma 9-like protein	BCL9L	0	NaN	PFSSLKGKVKRDRSVSVDSGEQREAGTPSLD	1	1.81803	NaN	NaN	NaN	NaN	NaN	S	2	0.999943	0.00413452	114.72	42.4303	0	1.81803
Q86UU0-3;Q86UU0-4;Q86UU0-2;Q86UU0	1017;1017;1012;1017	Q86UU0-3	B-cell CLL/lymphoma 9-like protein	BCL9L	0	NaN	VPSPGWVASPKTAMPSPGVSQNKQPPLNMNS	1	1.00598	NaN	0.893595	NaN	NaN	NaN	S	2	0.999659	0.00463147	85.742	34.8831	1.42459	0.949785
Q86UU0-3;Q86UU0-4;Q86UU0-2;Q86UU0	936;936;931;936	Q86UU0-3	B-cell CLL/lymphoma 9-like protein	BCL9L	0	NaN	INQMGSPGMGHLKSPTLSQVHSPLVTSPSAN	1	-1.61449	NaN	-1.21347	NaN	NaN	NaN	T	3	0.770339	0.00413025	43.696	5.75793	1.04731	-1.41398
E9PK91;Q9NYF8-3;E9PQN2;E9PKI6;E9PK09;Q9NYF8-2;Q9NYF8	389;387;387;389;389;387;389	E9PK91;Q9NYF8-2	Bcl-2-associated transcription factor 1	BCLAF1	0	NaN	EWEDQEALDYFSDKESGKQKFNDSEGDDTEE	2	NaN	0.12499	NaN	0.167333	NaN	NaN	S	3	1	7.93e-05	183.79	116.575	0	NaN
E9PK91;Q9NYF8-3;E9PQN2;E9PKI6;E9PK09;E9PJA7;Q9NYF8-2;Q9NYF8;Q9NYF8-4	259;257;257;259;259;257;257;259;259	E9PK91;Q9NYF8-2	Bcl-2-associated transcription factor 1	BCLAF1	0	NaN	DAPMLSTVHSAKNTPSQHSHSIQHSPERSGS	2	NaN	0.12499	NaN	0.167333	NaN	NaN	S	2	0.929645	0.000327622	146.39	12.9195	0	NaN
E9PK91;Q9NYF8-3;E9PQN2;E9PKI6;E9PK09;E9PJA7;Q9NYF8-2;Q9NYF8;Q9NYF8-4	262;260;260;262;262;260;260;262;262	E9PK91;Q9NYF8-2	Bcl-2-associated transcription factor 1	BCLAF1	0	NaN	MLSTVHSAKNTPSQHSHSIQHSPERSGSGSV	2;3	NaN	0.12499	NaN	0.167333	NaN	NaN	S	3	0.722572	0.000264697	124.08	5.76268	0	NaN
E9PK91;Q9NYF8-3;E9PQN2;E9PKI6;E9PK09;E9PJA7;Q9NYF8-2;Q9NYF8;Q9NYF8-4	264;262;262;264;264;262;262;264;264	E9PK91;Q9NYF8-2	Bcl-2-associated transcription factor 1	BCLAF1	0	NaN	STVHSAKNTPSQHSHSIQHSPERSGSGSVGN	2;3	NaN	0.12499	NaN	0.167333	NaN	NaN	S	2	0.995765	1.65e-10	277.91	23.7195	0	NaN
E9PK91;Q9NYF8-3;E9PQN2;E9PKI6;E9PK09;E9PJA7;H0YF00;Q9NYF8-2;Q9NYF8;Q9NYF8-4	276;274;274;276;276;274;17;274;276;276	E9PK91;Q9NYF8-2	Bcl-2-associated transcription factor 1	BCLAF1	0	NaN	HSHSIQHSPERSGSGSVGNGSSRYSPSQNSP	1	NaN	0.12499	NaN	0.167333	NaN	NaN	S	2	0.999998	0.00904253	157.07	56.8424	0	NaN
E9PK91;Q9NYF8-3;E9PQN2;E9PKI6;E9PK09;E9PJA7;H0YF00;Q9NYF8-2;Q9NYF8;Q9NYF8-4	287;285;285;287;287;285;28;285;287;287	E9PK91;Q9NYF8-2	Bcl-2-associated transcription factor 1	BCLAF1	0	NaN	SGSGSVGNGSSRYSPSQNSPIHHIPSRRSPA	3	NaN	0.12499	NaN	0.167333	NaN	NaN	S	3	0.992469	0.0120035	41.53	20.5635	0	NaN
E9PK91;Q9NYF8-3;E9PQN2;E9PKI6;E9PK09;E9PJA7;H0YF00;Q9NYF8-2;Q9NYF8;Q9NYF8-4	297;295;295;297;297;295;38;295;297;297	E9PK91;Q9NYF8-2	Bcl-2-associated transcription factor 1	BCLAF1	0	NaN	SRYSPSQNSPIHHIPSRRSPAKTIAPQNAPR	3	NaN	0.12499	NaN	0.167333	NaN	NaN	S	4	0.656521	9.75e-05	96.387	3.59916	0	NaN
E9PK91;Q9NYF8-3;E9PQN2;E9PKI6;E9PK09;E9PJA7;Q9NYF8-2;Q9NYF8;Q9NYF8-4	525;523;523;525;525;350;523;525;352	E9PK91;Q9NYF8-2	Bcl-2-associated transcription factor 1	BCLAF1	0	NaN	DYSPPLHKNLDAREKSTFREESPLRIKMIAS	2	NaN	0.12499	NaN	0.167333	NaN	NaN	S	2	0.89375	0.0397737	113.98	9.24889	0	NaN
E9PK91;Q9NYF8-3;E9PQN2;E9PKI6;E9PK09;E9PJA7;H0YF00;Q9NYF8-2;Q9NYF8;Q9NYF8-4	300;298;298;300;300;298;41;298;300;300	E9PK91;Q9NYF8-2	Bcl-2-associated transcription factor 1	BCLAF1	0	NaN	SPSQNSPIHHIPSRRSPAKTIAPQNAPRDES	3	NaN	0.12499	NaN	0.167333	NaN	NaN	S	3	0.520031	2.72e-05	126.91	0.455537	0	NaN
E9PK91;Q9NYF8-3;E9PQN2;E9PKI6;E9PK09;Q9NYF8-2;Q9NYF8	494;492;492;494;494;492;494	E9PK91;Q9NYF8-2	Bcl-2-associated transcription factor 1	BCLAF1	0	NaN	KEEDKNSERITVKKETQSPEQVKSEKLKDLF	2	NaN	0.12499	NaN	0.167333	NaN	NaN	T	2	1	0.00829249	213.47	213.47	0	NaN
E9PK91;Q9NYF8-3;E9PQN2;E9PKI6;E9PK09;Q9NYF8-2;Q9NYF8;Q9NYF8-4	661;659;659;661;660;659;661;488	E9PK91;Q9NYF8-2	Bcl-2-associated transcription factor 1	BCLAF1	0	NaN	QKSPEIHRRIDISPSTLRKHTRLAGEERVFK	2	NaN	0.12499	NaN	0.167333	NaN	NaN	T	2	0.790387	0.0192139	87.447	5.74416	0	NaN
E9PK91;Q9NYF8-3;E9PQN2;E9PKI6;E9PK09;E9PJA7;Q9NYF8-2;Q9NYF8;Q9NYF8-4	257;255;255;257;257;255;255;257;257	E9PK91;Q9NYF8-2	Bcl-2-associated transcription factor 1	BCLAF1	0	NaN	CSDAPMLSTVHSAKNTPSQHSHSIQHSPERS	2;3	NaN	0.12499	NaN	0.167333	NaN	NaN	T	3	0.999992	9.09e-15	313.32	50.7588	0	NaN
E9PK91;Q9NYF8-3;E9PQN2;E9PKI6;E9PK09;E9PJA7;Q9NYF8-2;Q9NYF8;Q9NYF8-4	578;576;576;578;578;403;576;578;405	E9PK91;Q9NYF8-2	Bcl-2-associated transcription factor 1	BCLAF1	0	0.916867	ASLTKDRLLASTLVHSVKKEQEFRSIFDHIK	1	NaN	0.12499	1.0842	0.167333	NaN	0.916867	S	2	0.999934	0.00279804	92.939	42.0426	0	1.0842
E9PK91;Q9NYF8-3;E9PQN2;E9PKI6;E9PK09;Q9NYF8-2;Q9NYF8;Q9NYF8-4	690;688;688;690;689;688;690;517	E9PK91;Q9NYF8-2	Bcl-2-associated transcription factor 1	BCLAF1	2.24722	0.63717	FKEENQKGDKKLRCDSADLRHDIDRRRKERS	1	0.767824	0.12499	0.798839	0.167333	0.642834	0.631505	S	2	1	0.0152096	119.25	103.975	1.89959	0.783331
E9PK91;Q9NYF8-3;E9PQN2;E9PKI6;E9PK09;Q9NYF8-2;Q9NYF8	397;395;395;397;397;395;397	E9PK91;Q9NYF8-2	Bcl-2-associated transcription factor 1	BCLAF1	1.40904	0.533562	DYFSDKESGKQKFNDSEGDDTEETEDYRQFR	1	0.625831	0.12499	0.733615	0.167333	0.500842	0.566281	S	2	0.999996	0.00150622	124.31	54.3305	1.29784	0.679723
E9PK91;Q9NYF8-3;E9PQN2;E9PKI6;E9PK09;Q9NYF8-2;Q9NYF8	385;383;383;385;385;383;385	E9PK91;Q9NYF8-2	Bcl-2-associated transcription factor 1	BCLAF1	1.51575	0.345762	RAEGEWEDQEALDYFSDKESGKQKFNDSEGD	1;2	0.454176	0.12499	0.529671	0.167333	0.329186	0.362338	S	3	1	6.06e-49	384.77	82.2104	1.31198	0.491924
E9PK91;Q9NYF8-3;E9PQN2;E9PKI6;E9PK09;E9PJA7;Q9NYF8-2;Q9NYF8;Q9NYF8-4	196;194;194;196;196;194;194;196;196	E9PK91;Q9NYF8-2	Bcl-2-associated transcription factor 1	BCLAF1	0.487582	0.322732	SKSQEEPKDTFEHDPSESIDEFNKSSATSGD	1	0.628727	0.12499	0.30906	0.167333	0.503737	0.141727	S	2	0.999271	1.56e-05	215.62	31.3729	0.679556	0.468893
E9PK91;Q9NYF8-3;E9PQN2;E9PKI6;E9PK09;Q9NYF8-2;Q9NYF8	427;425;425;427;427;425;427	E9PK91;Q9NYF8-2	Bcl-2-associated transcription factor 1	BCLAF1	0	0.268097	RKSVLADQGKSFATASHRNTEEEGLKYKSKV	1	0.393087	0.12499	NaN	0.167333	0.268097	NaN	S	3	0.577954	0.00279934	56.304	1.44727	0	0.393087
E9PK91;Q9NYF8-3;E9PQN2;E9PKI6;E9PK09;Q9NYF8-2;Q9NYF8	496;494;494;496;496;494;496	E9PK91;Q9NYF8-2	Bcl-2-associated transcription factor 1	BCLAF1	0.442286	0.196617	EDKNSERITVKKETQSPEQVKSEKLKDLFDY	1;2	0.446891	0.12499	0.238665	0.167333	0.321902	0.0713316	S	2	1	3.34e-07	289.75	80.4079	0.726476	0.342778
E9PK91;Q9NYF8-3;E9PQN2;E9PKI6;E9PK09;E9PJA7;Q9NYF8-2;Q9NYF8;Q9NYF8-4	531;529;529;531;531;356;529;531;358	E9PK91;Q9NYF8-2	Bcl-2-associated transcription factor 1	BCLAF1	0.610567	0.190535	HKNLDAREKSTFREESPLRIKMIASDSHRPE	1;2	0.238298	0.12499	0.435095	0.167333	0.113308	0.267762	S	3	1	0.00057902	223.03	77.7159	0.742298	0.336696
E9PK91;Q9NYF8-3;E9PQN2;E9PKI6;E9PK09;Q9NYF8-2;Q9NYF8;Q9NYF8-4	658;656;656;658;657;656;658;485	E9PK91;Q9NYF8-2	Bcl-2-associated transcription factor 1	BCLAF1	0.96091	0.182682	STRQKSPEIHRRIDISPSTLRKHTRLAGEER	1;2	0.275961	0.12499	0.381726	0.167333	0.150971	0.214393	S	2	0.999998	0.000664998	219.61	56.6751	0.993497	0.328843
E9PK91;Q9NYF8-3;E9PQN2;E9PKI6;E9PK09;E9PJA7;Q9NYF8-2;Q9NYF8;Q9NYF8-4	268;266;266;268;268;266;266;268;268	E9PK91;Q9NYF8-2	Bcl-2-associated transcription factor 1	BCLAF1	0	0.180333	SAKNTPSQHSHSIQHSPERSGSGSVGNGSSR	1;2;3	NaN	0.12499	0.347666	0.167333	NaN	0.180333	S	2	1	9.09e-15	313.32	98.6678	0	0.347666
E9PK91;Q9NYF8-3;E9PQN2;E9PKI6;E9PK09;E9PJA7;Q9NYF8-2;Q9NYF8;Q9NYF8-4	222;220;220;222;222;220;220;222;222	E9PK91;Q9NYF8-2	Bcl-2-associated transcription factor 1	BCLAF1	1.2622	0.146006	ATSGDIWPGLSAYDNSPRSPHSPSPIATPPS	1	0.283566	0.12499	0.300768	0.167333	0.158577	0.133435	S	3	0.999944	2.74e-06	170.1	45.3285	1.72734	0.292167
E9PK91;Q9NYF8-3;E9PQN2;E9PKI6;E9PK09;Q9NYF8-2;Q9NYF8;Q9NYF8-4	648;646;646;648;648;646;648;475	E9PK91;Q9NYF8-2	Bcl-2-associated transcription factor 1	BCLAF1	0.268511	0.0939098	TSYQKATEEHSTRQKSPEIHRRIDISPSTLR	1	0.325041	0.12499	0.155102	0.167333	0.200051	-0.0122315	S	3	1	0.0120388	112.85	51.2762	0.664416	0.240071
E9PK91;Q9NYF8-3;E9PQN2;E9PKI6;E9PK09;Q9NYF8-2;Q9NYF8	512;510;510;512;512;510;512	E9PK91;Q9NYF8-2	Bcl-2-associated transcription factor 1	BCLAF1	0.385837	0.0696731	PEQVKSEKLKDLFDYSPPLHKNLDAREKSTF	1	0.247198	0.12499	0.184471	0.167333	0.122209	0.0171376	S	2	1	0.000722579	198.29	76.747	1.03684	0.215835
E9PK91;Q9NYF8-3;E9PQN2;E9PKI6;E9PK09;E9PJA7;Q9NYF8-2;Q9NYF8;Q9NYF8-4	198;196;196;198;198;196;196;198;198	E9PK91;Q9NYF8-2	Bcl-2-associated transcription factor 1	BCLAF1	0.568939	0.0472994	SQEEPKDTFEHDPSESIDEFNKSSATSGDIW	1	0.150949	0.12499	0.235972	0.167333	0.0259597	0.068639	S	3	0.999989	6.02e-27	350.04	49.4926	0.861056	0.193461
E9PK91;Q9NYF8-3;E9PQN2;E9PKI6;E9PK09;E9PJA7;Q9NYF8-2;Q9NYF8;Q9NYF8-4	177;175;175;177;177;175;175;177;177	E9PK91;Q9NYF8-2	Bcl-2-associated transcription factor 1	BCLAF1	0.132421	-0.0398533	QEKQTKKAEGEPQEESPLKSKSQEEPKDTFE	1	-0.0058548	0.12499	0.218471	0.167333	-0.130845	0.0511381	S	2	1	5.77e-17	316.41	78.95	0.286462	0.106308
E9PK91;Q9NYF8-3;E9PQN2;E9PKI6;E9PK09;E9PJA7;Q9NYF8-2;Q9NYF8;Q9NYF8-4	564;562;562;564;564;389;562;564;391	E9PK91;Q9NYF8-2	Bcl-2-associated transcription factor 1	BCLAF1	0	-0.0935947	LKMAPVPLDDSNRPASLTKDRLLASTLVHSV	1	0.0313951	0.12499	NaN	0.167333	-0.0935947	NaN	S	2	0.99511	9.2e-05	150.95	23.2038	0	0.0313951
E9PK91;Q9NYF8-3;E9PQN2;E9PKI6;E9PK09;E9PJA7;Q9NYF8-2;Q9NYF8;Q9NYF8-4	183;181;181;183;183;181;181;183;183	E9PK91;Q9NYF8-2	Bcl-2-associated transcription factor 1	BCLAF1	3.91612	-0.144831	KAEGEPQEESPLKSKSQEEPKDTFEHDPSES	1	-0.0198138	0.12499	0.0224743	0.167333	-0.144804	-0.144859	S	3	1	2.8e-25	283.95	92.951	0.0177288	0.00133027
E9PK91;Q9NYF8-3;H0YF63;Q9NYF8-2;Q9NYF8;Q9NYF8-4	760;758;15;758;760;587	E9PK91;Q9NYF8-2	Bcl-2-associated transcription factor 1	BCLAF1	0.382743	-0.173734	EQDHSRSSSSSASPSSPSSREEKESKKEREE	1	0.0835197	0.12499	-0.138664	0.167333	-0.0414701	-0.305997	S	2	0.587147	0.000746724	169.06	2.90566	0.0730787	-0.0275721
Q9NYF8-2;Q9NYF8;Q9NYF8-4;B0AZU3;H0YF14	838;840;667;58;107	Q9NYF8-2	Bcl-2-associated transcription factor 1	BCLAF1	1.45754	-0.279368	TFQKRPKEEEWDPEYTPKSKKYFLHDDRDDG	1	-0.139061	0.12499	-0.239907	0.054779	-0.264051	-0.294686	T	2	0.999999	0.00209681	143.05	58.5755	0.781014	-0.189484
E9PK91;Q9NYF8-3;E9PQN2;E9PKI6;E9PK09;E9PJA7;H0YF00;Q9NYF8-2;Q9NYF8;Q9NYF8-4	290;288;288;290;290;288;31;288;290;290	E9PK91;Q9NYF8-2	Bcl-2-associated transcription factor 1	BCLAF1	1.28367	-0.342046	GSVGNGSSRYSPSQNSPIHHIPSRRSPAKTI	1;2;3	-0.245078	0.12499	-0.146691	0.167333	-0.370068	-0.314024	S	2	0.999999	1.94e-08	269.53	60.9279	0.805101	-0.195885
E9PK91;Q9NYF8-3;E9PQN2;E9PKI6;E9PK09;E9PJA7;H0YF00;Q9NYF8-2;Q9NYF8;Q9NYF8-4	285;283;283;285;285;283;26;283;285;285	E9PK91;Q9NYF8-2	Bcl-2-associated transcription factor 1	BCLAF1	1.56139	-0.415491	ERSGSGSVGNGSSRYSPSQNSPIHHIPSRRS	1;2;3	-0.30843	0.12499	-0.230228	0.167333	-0.43342	-0.397561	S	4	0.999977	2.25e-08	268.16	46.4314	1.03724	-0.269329
E9PK91;Q9NYF8-3;E9PQN2;E9PKI6;E9PK09;H0YF00;Q9NYF8-2;Q9NYF8	341;339;339;341;341;82;339;341	E9PK91;Q9NYF8-2	Bcl-2-associated transcription factor 1	BCLAF1	0	-0.491512	GDQETAKTGKFLKRFTDEESRVFLLDRGNTR	1	-0.366522	0.12499	NaN	0.167333	-0.491512	NaN	T	2	1	0.00284986	158.02	75.214	0	-0.366522
E9PK91;Q9NYF8-3;E9PQN2;E9PKI6;E9PK09;E9PJA7;Q9NYF8-2;Q9NYF8;Q9NYF8-4	228;226;226;228;228;226;226;228;228	E9PK91;Q9NYF8-2	Bcl-2-associated transcription factor 1	BCLAF1	0	-1.19617	WPGLSAYDNSPRSPHSPSPIATPPSQSSSCS	1	-1.07118	0.12499	NaN	0.167333	-1.19617	NaN	S	3	0.985453	4.26e-13	180.36	19.8384	0	-1.07118
Q6W2J9-4;Q6W2J9-2;Q6W2J9;H7BYY2;Q6W2J9-3	562;562;562;562;562	Q6W2J9-4	BCL-6 corepressor	BCOR	0	NaN	MGGTDAVITNVSGSVSSAGRPASASPAPNAN		NaN	0.144046	NaN	0.261832	NaN	NaN	S	3	0.415657	2e-06	129.25	1.26861	0	NaN
Q6W2J9-4;Q6W2J9-2;Q6W2J9;H7BYY2;Q6W2J9-3	563;563;563;563;563	Q6W2J9-4	BCL-6 corepressor	BCOR	0	NaN	GGTDAVITNVSGSVSSAGRPASASPAPNANA		NaN	0.144046	NaN	0.261832	NaN	NaN	S	3	0.314291	7.66e-05	89.771	0.98899	0	NaN
Q6W2J9-4;Q6W2J9-2;Q6W2J9;H7C2V9;A6NE70;H7BZ37;H7C231	1353;1371;1405;275;248;78;100	Q6W2J9-4	BCL-6 corepressor	BCOR	0	NaN	GKVTVRRFRKRPEPSSDYDLSPAKQEPKPFD	2	NaN	0.144046	NaN	0.261832	NaN	NaN	S	2	0.926171	0.00038576	136.67	10.9847	0	NaN
Q6W2J9-4;Q6W2J9-2;Q6W2J9;H7C2V9;A6NE70;H7BZ37;H7C231	1358;1376;1410;280;253;83;105	Q6W2J9-4	BCL-6 corepressor	BCOR	0.345142	1.82646	RRFRKRPEPSSDYDLSPAKQEPKPFDRLQQL	1;2	0.402067	0.144046	3.65672	0.261832	0.258021	3.39489	S	2	1	5.37e-16	247.27	144.005	0.366247	2.0294
Q6W2J9-4;Q6W2J9-2;Q6W2J9;H7BYY2;Q6W2J9-3	669;669;669;669;669	Q6W2J9-4	BCL-6 corepressor	BCOR	2.06338	0.728352	PRSYLPYPAPEGIAVSPLSLHGKGPVYPHPV	1	0.862511	0.144046	1.00007	0.261832	0.718464	0.73824	S	3	0.991409	7.23e-05	129.5	20.6223	1.32853	0.931291
Q6W2J9-4;Q6W2J9-2;Q6W2J9;H7BYY2;Q6W2J9-3	336;336;336;336;336	Q6W2J9-4	BCL-6 corepressor	BCOR	0	0.458981	VTSGLPGDTALLLPPSPRPSPRVHLPTQPAA	1	0.603027	0.144046	NaN	0.261832	0.458981	NaN	S	3	0.938131	3.82e-05	102.72	11.8197	0	0.603027
Q6W2J9-4;Q6W2J9-2;Q6W2J9;H7BYY2;Q6W2J9-3	488;488;488;488;488	Q6W2J9-4	BCL-6 corepressor	BCOR	0	0.426708	SGLVLSGSEIPKETLSPPGNGCAIYRSEIIS	1	0.570754	0.144046	NaN	0.261832	0.426708	NaN	S	2	0.999937	0.000391288	128.71	41.9972	0	0.570754
Q6W2J9-4;Q6W2J9-2;Q6W2J9;H7BYY2;H7C2V9;A6NE70	1121;1139;1139;1139;43;16	Q6W2J9-4	BCL-6 corepressor	BCOR	0.232324	0.385534	MPHSPTLRVDRKRKVSGDSSHTETTAEEVPE	1	1.03591	0.144046	0.14104	0.261832	0.891859	-0.120791	S	3	0.999135	9.65e-23	303.18	32.0184	0.383154	0.588473
Q6W2J9-4;Q6W2J9-2;Q6W2J9;H7BYY2;Q6W2J9-3	367;367;367;367;367	Q6W2J9-4	BCL-6 corepressor	BCOR	0.302112	0.370039	DTYSEFHKHYARISTSPSVALSKPYMTVSSE	1	0.882682	0.144046	0.263275	0.261832	0.738636	0.0014431	S	2	0.913068	0.004863	91.845	13.2483	0.501048	0.572978
Q6W2J9-4;Q6W2J9-2;Q6W2J9;H7BYY2;Q6W2J9-3	486;486;486;486;486	Q6W2J9-4	BCL-6 corepressor	BCOR	0.99659	0.328474	AGSGLVLSGSEIPKETLSPPGNGCAIYRSEI	1	0.420078	0.144046	0.642748	0.261832	0.276032	0.380916	T	2	0.516291	0.0021445	83.823	0.283109	0.881158	0.531413
Q6W2J9-4;Q6W2J9-2;Q6W2J9;H7BYY2;Q6W2J9-3	366;366;366;366;366	Q6W2J9-4	BCL-6 corepressor	BCOR	0	0.326881	ADTYSEFHKHYARISTSPSVALSKPYMTVSS	1	0.470927	0.144046	NaN	0.261832	0.326881	NaN	T	2	0.698004	0.00356043	103.76	3.64952	0	0.470927
Q6W2J9-4;Q6W2J9-2;Q6W2J9;H7BYY2;Q6W2J9-3	422;422;422;422;422	Q6W2J9-4	BCL-6 corepressor	BCOR	0.0097667	0.00602958	PGHARKTAVQDRKDGSSPPLLEKQTVTKDVT	1	0.32262	0.144046	0.0953169	0.261832	0.178574	-0.166515	S	2	0.884949	0.00138942	201.27	8.86026	0.498782	0.208969
Q6W2J9-4;Q6W2J9-2;Q6W2J9;H7BYY2;Q6W2J9-3	569;569;569;569;569	Q6W2J9-4	BCL-6 corepressor	BCOR	0.0123098	-0.00982642	ITNVSGSVSSAGRPASASPAPNANADGTKTS	1	-0.0894822	0.144046	0.475708	0.261832	-0.233529	0.213876	S	4	0.587556	2.27e-13	179.88	1.54132	0.208753	0.193113
Q6W2J9-4;Q6W2J9-2;Q6W2J9;H7BYY2;Q6W2J9-3	423;423;423;423;423	Q6W2J9-4	BCL-6 corepressor	BCOR	0.33385	-0.02535	GHARKTAVQDRKDGSSPPLLEKQTVTKDVTD	1	0.141302	0.144046	0.213876	0.261832	-0.0027444	-0.0479556	S	2	0.999273	0.00255303	136.24	31.3826	0.891722	0.177589
Q6W2J9-4;Q6W2J9-2;Q6W2J9;H7BYY2;H7C2V9	1109;1127;1127;1127;31	Q6W2J9-4	BCL-6 corepressor	BCOR	0.440499	-0.187725	VSEPPADQVASDMPHSPTLRVDRKRKVSGDS	1	0.0765591	0.144046	-0.0461314	0.261832	-0.0674873	-0.307963	S	2	0.850635	4.37e-10	201.79	7.68035	0.0730209	0.0152139
Q6W2J9-4;Q6W2J9-2;Q6W2J9;H7BYY2;Q6W2J9-3	571;571;571;571;571	Q6W2J9-4	BCL-6 corepressor	BCOR	1.04294	-0.190987	NVSGSVSSAGRPASASPAPNANADGTKTSRS	1	-0.0195798	0.144046	0.0434844	0.261832	-0.163626	-0.218347	S	2	1	8.5e-20	264.59	85.8504	0.113881	0.0119523
Q6W2J9-4;Q6W2J9-2;Q6W2J9;H7BYY2;H7C2V9;A6NE70	1238;1256;1290;1256;160;133	Q6W2J9-4	BCL-6 corepressor	BCOR	1.21905	-0.346767	LKPSDNEQGLPVFSGSPPMKSLSSTSAGGKK	1	-0.169728	0.144046	-0.117928	0.261832	-0.313775	-0.37976	S	3	0.977602	2.53e-05	113.39	16.4005	0.945293	-0.143828
Q5H9F3-3;Q5H9F3-2;Q5H9F3	496;496;496	Q5H9F3-3	BCL-6 corepressor-like protein 1	BCORL1	0	1.51897	LPSYLQDRCLPGVLASPELRSYPYAFSVARP	1	2.06029	0.541317	NaN	0.889084	1.51897	NaN	S	2	1	0.0230617	62.861	62.8609	0	2.06029
Q5H9F3-3	1469	Q5H9F3-3	BCL-6 corepressor-like protein 1	BCORL1	0	1.05619	VKPTEPCTPSKSRSASSEEASESPTARQIPP	1;2	1.59751	0.541317	NaN	0.889084	1.05619	NaN	S	2	0.981319	0.000312739	127.59	18.0889	0	1.59751
Q5H9F3-3	1452	Q5H9F3-3	BCL-6 corepressor-like protein 1	BCORL1	0	0.749638	KGRWSQQKTRSPKSPTPVKPTEPCTPSKSRS	1	1.29096	0.541317	NaN	0.889084	0.749638	NaN	T	2	0.891135	0.0298456	142.79	9.13056	0	1.29096
Q5H9F3-3	1450	Q5H9F3-3	BCL-6 corepressor-like protein 1	BCORL1	1.17061	0.663749	KGKGRWSQQKTRSPKSPTPVKPTEPCTPSKS	1;2	1.27572	0.541317	1.48218	0.889084	0.734405	0.593093	S	2	0.986965	0.00405246	144.58	18.7918	1.32268	1.37895
Q5H9F3-3;Q5H9F3-2;Q5H9F3;H7C4B2	1192;1192;1192;628	Q5H9F3-3	BCL-6 corepressor-like protein 1	BCORL1	0	0.248037	RGKHKHRKPTKPESQSPGKRADSHEEGSLEK	1	0.789354	0.541317	NaN	0.889084	0.248037	NaN	S	2	0.940381	0.0162265	103.79	11.9792	0	0.789354
Q5H9F3-3;Q5H9F3-2;Q5H9F3;H7C4B2	599;599;599;35	Q5H9F3-3	BCL-6 corepressor-like protein 1	BCORL1	0.114146	-0.181741	PSGTEQQTEGTSVTFSPLKSPPQLEREMASP	1	-0.118821	0.541317	1.18574	0.889084	-0.660138	0.296656	S	2	0.962656	0.00390847	49.266	14.8295	0.249043	0.533459
Q5H9F3-3	1476	Q5H9F3-3	BCL-6 corepressor-like protein 1	BCORL1	0.329011	-0.23072	TPSKSRSASSEEASESPTARQIPPEARRLIV	1;2	0.519743	0.541317	0.449218	0.889084	-0.0215735	-0.439866	S	2	0.905014	0.000138296	216.72	9.79978	1.33485	0.484481
Q5H9F3-3	1461	Q5H9F3-3	BCL-6 corepressor-like protein 1	BCORL1	0.82163	-1.3503	RSPKSPTPVKPTEPCTPSKSRSASSEEASES	1;2	-0.483037	0.541317	-0.787169	0.889084	-1.02435	-1.67625	T	2	0.992036	0.00405246	149.33	21.0381	0.825031	-0.635103
P11274-2;P11274;H0Y554	698;698;182	P11274-2	Breakpoint cluster region protein	BCR	0.792949	0.38091	NFLSSINEEITPRRQSMTVKKGEHRQLLKDS	1	0.397584	0.115166	0.594835	0.115433	0.282417	0.479402	S	2	0.989201	0.0133651	104.95	19.6189	0.903418	0.49621
P11274-2;P11274	459;459	P11274-2	Breakpoint cluster region protein	BCR	0.563996	-0.366383	EEQRRHQDGLPYIDDSPSSSPHLSSKGRGSR	1	-0.418658	0.115166	-0.0835081	0.115433	-0.533825	-0.198941	S	3	0.979347	3.28e-24	303.02	18.0044	0.426362	-0.251083
P11274-2;P11274;A9UF05	235;235;235	P11274-2	Breakpoint cluster region protein	BCR;BCR/ABL fusion	0	NaN	GSSVGDASRPPYRGRSSESSCGVDGDYEDAE		NaN	0.115166	NaN	0.115433	NaN	NaN	S	3	0.465827	2.62e-05	117.04	0	0	NaN
P11274-2;P11274;A9UF05	236;236;236	P11274-2	Breakpoint cluster region protein	BCR;BCR/ABL fusion	0	NaN	SSVGDASRPPYRGRSSESSCGVDGDYEDAEL		NaN	0.115166	NaN	0.115433	NaN	NaN	S	3	0.465827	2.62e-05	117.04	0	0	NaN
P11274-2;P11274;A9UF05	215;215;215	P11274-2	Breakpoint cluster region protein	BCR;BCR/ABL fusion	0.56049	0.388187	ISSLGSQAMQMERKKSQHGAGSSVGDASRPP	1	0.682393	0.115166	0.32458	0.115433	0.567227	0.209147	S	3	0.999945	0.000152715	94.671	43.8129	0.662831	0.503487
P11274-2;P11274;A9UF05	354;354;354	P11274-2	Breakpoint cluster region protein	BCR;BCR/ABL fusion	1.55477	-0.142635	TSSEEDFSSGQSSRVSPSPTTYRMFRDKSRS	1	-0.0212186	0.115166	-0.0334514	0.115433	-0.136385	-0.148884	S	2	0.99919	0.00732056	80.014	30.9339	0.853438	-0.027335
P11274-2;P11274;A9UF05	356;356;356	P11274-2	Breakpoint cluster region protein	BCR;BCR/ABL fusion	0.521636	-0.515619	SEEDFSSGQSSRVSPSPTTYRMFRDKSRSPS	1	-0.136854	0.115166	-0.663785	0.115433	-0.252021	-0.779218	S	2	0.919374	0.0107697	71.176	12.477	0.431141	-0.40032
P11274-2;P11274;A9UF05	122;122;122	P11274-2	Breakpoint cluster region protein	BCR;BCR/ABL fusion	2.26241	-1.13212	PPPAEEPEARPDGEGSPGKARPGTARRPGAA	1	-1.02668	0.115166	-1.00697	0.115433	-1.14184	-1.1224	S	3	1	6.87e-13	184.69	67.3453	2.20984	-1.01682
A6H8Y1-7;A6H8Y1-6;A6H8Y1;A6H8Y1-2;H0YCV8;H7C5U4;A6H8Y1-8	2195;2207;2227;2227;249;483;363	A6H8Y1-7	Transcription factor TFIIIB component B'' homolog	BDP1	0	NaN	TGPCTLGLDRGLGENSVEEPQIKDSKGDSVL	1	0.566669	NaN	NaN	NaN	NaN	NaN	S	2	1	0.0260894	46.318	46.3177	0	0.566669
A6H8Y1-7;A6H8Y1-6;A6H8Y1;H0YCV8	2419;2431;2451;473	A6H8Y1-7	Transcription factor TFIIIB component B'' homolog	BDP1	0	NaN	QRQQVEAAFQSRGSRSPDACMDKNVPQLPQD	1	0.218223	NaN	NaN	NaN	NaN	NaN	S	2	0.964541	0.0134128	117	14.346	0	0.218223
A6H8Y1-7;A6H8Y1-6;A6H8Y1;A6H8Y1-2;A6H8Y1-4;A6H8Y1-3	100;80;100;100;100;100	A6H8Y1-7	Transcription factor TFIIIB component B'' homolog	BDP1	0	NaN	SRSSSTVSQRRKRISSTSSLVKSSVSVPSES	1	2.24065	NaN	NaN	NaN	NaN	NaN	S	2	0.99052	0.00385609	111.63	20.5069	0	2.24065
Q5T5X7	164	Q5T5X7	BEN domain-containing protein 3	BEND3	0	NaN	LLNVYELFEKANASNSPSSLRLLNEPQKRDC	1	0.335255	NaN	-0.102729	NaN	NaN	NaN	S	2	0.800361	0.00318456	110.55	6.78665	0.161598	0.116263
Q5T5X7	379	Q5T5X7	BEN domain-containing protein 3	BEND3	0	NaN	DPGHFLDNKDQEEALSLDRSSTIASDHVVDT	1	-0.246823	NaN	-0.11821	NaN	NaN	NaN	S	2	1	0.00236635	172.57	134.685	0.666239	-0.182517
O15155;C9JTT8;Q68DU7;H7C1N3;Q96EA0	50;50;50;65;50	O15155	BET1 homolog	BET1;DKFZp781C0425	1.42074	0.392239	LTESLRSKVTAIKSLSIEIGHEVKTQNKLLA	1	0.414135	-0.00151562	0.327572	-0.0412538	0.415651	0.368826	S	2	0.99992	0.00329209	134.04	40.969	1.13098	0.370854
H7BXT7;B8ZZS0;Q9NYM9;E9PHY4	9;9;9;9	H7BXT7	BET1-like protein	BET1L	0	0.0021917	_______MADWARAQSPGAVEEILDRENKRM	1	-0.23943	NaN	-0.212618	-0.214809	NaN	0.0021917	S	3	1	0.000643618	153.36	74.5051	1.42348	-0.226024
A6NGY7;Q9H694-2;Q9H694	259;633;633	A6NGY7	Protein bicaudal C homolog 1	BICC1	0	NaN	TEGCNDAFVEVGMPRSPSHSGNAGDLKQMMC	1	0.893828	NaN	NaN	NaN	NaN	NaN	S	2	0.996329	0.0019213	85.006	24.3491	0	0.893828
A8MVZ6;Q96G01-4;Q96G01-3;Q96G01	593;593;593;593	A8MVZ6	Protein bicaudal D homolog 1	BICD1	0	NaN	SEPVAKESTEASKEPSPTKTPTISPVITAPP	1	NaN	NaN	NaN	NaN	NaN	NaN	S	2	0.802658	0.00644912	103.29	6.10446	0	NaN
Q8TD16;Q8TD16-2	329;329	Q8TD16	Protein bicaudal D homolog 2	BICD2	0	NaN	DNKTSTPKKEGLAPPSPSLVSDLLSELNISE		NaN	0.148348	NaN	0.23008	NaN	NaN	S	3	0.495614	2.16e-05	85.595	0	0	NaN
Q8TD16;Q8TD16-2	331;331	Q8TD16	Protein bicaudal D homolog 2	BICD2	0	NaN	KTSTPKKEGLAPPSPSLVSDLLSELNISEIQ		NaN	0.148348	NaN	0.23008	NaN	NaN	S	3	0.495614	2.16e-05	85.595	0	0	NaN
Q8TD16;Q8TD16-2	568;568	Q8TD16	Protein bicaudal D homolog 2	BICD2	0	NaN	MLDYYREGQGGAGRTSPGGRTSPEARGRRSP	2	NaN	0.148348	NaN	0.23008	NaN	NaN	S	2	0.686471	0.0548136	80.535	3.40868	0	NaN
Q8TD16;Q8TD16-2	574;574	Q8TD16	Protein bicaudal D homolog 2	BICD2	0	NaN	EGQGGAGRTSPGGRTSPEARGRRSPILLPKG	2	NaN	0.148348	NaN	0.23008	NaN	NaN	S	2	0.686447	0.0548136	80.535	3.40868	0	NaN
[truncated: 17,464 more rows]

## Sheet: Pax3 phospho sites
Proteins	Positions within proteins	Leading proteins	Protein names	Gene names	-Log10 t-test p value_Phospho H(PAX3+Braf)/L(PAX2) norm on Protein level	log2 Ratio_Phospho H(Pax3+Braf)/L(Pax3) norm on Protein level	Sequence window	Number of Phospho (STY)	log 2 Ratio Phospho Exp1 H(Pax3+Braf)/ L(Pax3)	log 2 Ratio Proteome Exp1 H(Pax3+Braf)/ L(Pax3)	log 2 Ratio Phospho Exp2 H(Pax3+Braf)/ L(Pax3)	log 2 Ratio Proteome Exp2 H(Pax3+Braf)/ L(Pax3)	log 2 Ratio Phospho Exp1 norm on prot (H: Pax3+Braf)/L(Pax3))	log 2 Ratio Phospho Exp2 norm on prot (H: Pax3+Braf)/L(Pax3))	Amino acid	Charge	Localization prob	PEP	Score	Score diff	-Log10 t-test p value_Phospho H(PAX2+Braf)/L(PAX2) without normalization on protein level	log2 Ratio_Phospho_H(Pax3+Braf)/Pax3 without normalization on protein level
[truncated: 24 more rows]
